# Supplementary material for: Hypoxia-induced tracheal elasticity in vector beetle facilitates the loading of pinewood nematode
Source: eLife. 2023 Mar 30;12:e84621. doi: 10.7554/eLife.84621 (PMC10063229; doi:10.7554/eLife.84621)
Supplement: Figure 1—source data 1. [file elife-84621-fig1-data1.xlsx]

## Sheet: Sheet1
Figure 1B			Figure 1C
without PWN	with PWN			PWN number/0.3g beetle	partial pressure of oxygen
18.7035	12.0573		Null	0	19.957
19.1249	1.41373			0	18.5922
18.7655	0.0580305			0	19.0583
19.3265	0.131217			0	19.3286
19.5561	0.0696097			0	19.2703
19.9079	8.80951		Light	8043	10.22
16.6442	1.80621			1343	18.92
17.2029	11.2414			5598	15.36
18.6858	8.38698			3213	15.86
19.7707	7.08483			2862	16.59
17.0804	2.68359			2867	17.98
18.7053	4.87173			1853	17.32
18.4109	7.10573			2268	18.22
17.2199	0.463307			4749	14.78
19.8662	0.894223			4154	12.87
20.365	1.4905			3000	17.67
18.7358	0.017703			1718	17.92
19.7243	2.20294			3746	17.57
18.1268	11.0544			7776	15.51
16.995	5.37427			6193	15.27
18.7196	11.688			383	19.66
18.8532	2.37535			382	19.04
18.7477	11.5128		Heavy	10791	12.93
19.1934	2.55878			47211	6.49
18.4317	12.3263			37364	7.67
20.142	1.15278			62918	1.8
19.4118	1.29115			68430	0.14
17.7217	0.277291			57600	0.28
17.8792	0.438308			30450	8.86
18.5216	2.4756			45194	1.64
20.277	9.74753			40547	0.11
18.8341	3.9168			26366	4.09
20.4483	6.84638			53162	1.54
20.3251	0.0655637			19533	11.18
19.7687	0.194621			34154	4.41
19.272	0.0222441			15729	5.86
19.3773	0.135721
18.2607	0.0122263
	0.00333209
	0.0125822
	0.021453
	0.00668305
	0.000866369
	0.020905
	0.0049102
	0.0311326
	0.684088
	1.50625
	0.0688957
	5.18022
	0.871915
	0.338885
	4.32024
	3.81819
	1.51572
	1.50174
	1.8707
	3.18125
	0.705201
	10.9994
	6.84036
	10.1302
	8.35727
	7.78198
	1.8006
	7.45994
	3.41788
	8.33709
	11.3535
	9.35321
	6.20686
	7.56543
	0.22952
	0.211297
	5.85306
	3.8109
