# Supplementary material for: Hypoxia-induced tracheal elasticity in vector beetle facilitates the loading of pinewood nematode
Source: eLife. 2023 Mar 30;12:e84621. doi: 10.7554/eLife.84621 (PMC10063229; doi:10.7554/eLife.84621)
Supplement: Figure 2—figure supplement 1—source data 1. [file elife-84621-fig2-figsupp1-data1.xlsx]

## Sheet: Sheet1
Figure 2-figure spplement1-Morphological change
Rubberization degree	PWN number/0.3g beetle
I	1129
	1692.11
	1128.95
	820.408
	30
	843.158
	1029.43
	126.923
	440.69
	81.75
	731.765
	98.4
	180
	187
II	3965.22
	4417.5
	1898.18
	4620
	2638.78
	2762.79
	2536.96
	2100
III	15920.5
	8062.5
	32715
	14825
	22617.9
	10200
	23166.7
	8971.15
	29382.3
	21169.2
	14004.9
	8902.5
	19092
	10509.1
	20742.9
	8550
	7885.71
