# Supplementary material for: Hypoxia-induced tracheal elasticity in vector beetle facilitates the loading of pinewood nematode
Source: eLife. 2023 Mar 30;12:e84621. doi: 10.7554/eLife.84621 (PMC10063229; doi:10.7554/eLife.84621)
Supplement: Figure 2—source data 1. [file elife-84621-fig2-data1.xlsx]

## Sheet: Sheet1
Figure 2A. Young's Module									Figure2C. Thinkness
Null	Light	Heavy	1%O2 6h	1%O2 12h	1%O2 24h				without PWN	with PWN	1%O2 6h	1%O2 12h	1%O2 24h
5.60315	4.34057	4.17873	5.22876	4.95994	1.81522				519.988	382.174	203.591	235.255	230.792
6.536	2.74717	2.9953	4.77219	0.982011	6.38625				702.905	501.263	191.826	279.703	260.021
7.29366	7.53846	3.73037	4.10494	6.48824	4.69231				531.096	639.589	442.92	276.983	287.712
6.43785	5.16434	3.55659	4.80851	7.32679	6.50197				480.112	596.266	919.053	175.328	293.5
3.29277	7.30039	3.00517	2.10463	4.10284	3.33106				809.033	740.59	1322.82	218.72	316.656
4.88855	4.53924	3.95041	7.91462	1.91752	2.83854				689.3	2146.03	592.568	210.814	256.203
4.23762	4.41356	8.49302	3.90111	3.93935	3.08371				517.031	890.014	645.948	285.259	294.016
7.60425	3.25745	2.49726	4.38941	2.25052	1.69062				565.35	1011.25	543.69	339.787	362.967
3.48351	4.15576	7.97385	4.04916	4.06824	3.4734				475.773	867.434	721.213	335.025	339.197
4.18012	5.30883	3.31843	8.52346	3.9718	1.86815				701.334	910.023	579.722	144.196	1874.66
2.90089	9.04651	1.44871	4.16235	7.00136	5.48224				779.398	591.457	952.188	1740.5	767.214
3.58527	2.27982	2.83546	1.62375	3.32981	4.51945				439.738	447.756	488.05	1901.82	1293.85
3.57302	7.53654	0.561143	2.08482	5.26393	2.07403				482.937	973.756	671.153	2218.82	943.448
4.20082	9.34496	2.49487	8.67951	2.17735	3.31453				449.597	1066.88	88.78	1943.57	654.156
8.44396	8.50713	1.25134	3.33232	3.57175	0.724333				478.323	1170.51	122.253	2059.42	772.886
6.60618	5.77458	2.20602	6.83039	1.47954	1.79078				712.884	1223.19	159.465	1857.91	792.547
10.1426	2.09076	1.45472	5.89813	3.68632	3.30908				759.129	1475.73	196.417	2082.05	997.304
13.4969	5.1946	3.07281	2.83803	4.85329	3.88407				311.752	681.108	166.028	1024.23	2203.54
4.92056	7.58657	3.10601	6.13314	1.56123	0.8235				333.147	1079	310.382	1061.62	1956.55
3.09797	5.16868	3.30971	2.48061	3.02162	1.21023				264.178	1208.79	249.74	609.577	2236.21
2.65569	9.95288	3.84923	4.29535	2.89785	2.39922				226.394	595.104	213.607	503.085	2076.77
5.51417	6.27645	2.56839	3.15998	2.31587	6.15744				226.735	749.597	169.755	803.417	1662.81
12.758	11.1702	6.13307	5.7286	3.16949	2.23263				303.408	666.015	244.855	786.038	838.776
5.63828		2.63283	4.25883	3.13487	1.02855				683.521	855.563	248.368	1030.64	1121
3.64966		2.76806	2.80285	2.75798	2.20602				224.021	1164.4	230.8	1153.59	1771.18
10.5741		3.21025	2.9621	2.60849	4.68789				193.829	1029.4	284.368	966.958	1715.59
			3.08761	3.18392	1.85912				192.025	410.02	160.343	1486.68	1188.14
			1.01055	2.33186	4.73413				210.978	1229.64	187.035	2016.89	1300.54
			9.47387	6.75352	1.79278				284.923	888.558	186.88	2032.72	1168.51
			4.78887		6.96566				269.692		287.613	2274.1	1689.65
			7.6219		4.075				219.124		238.817	591.042	1342.93
			5.57513		2.93001				214.911		261.125	390.817	595.116
			8.6519		2.77008				230.173		269.79		1204.64
			5.40906		1.28003				173.586		218.02
			4.68665		4.17133						232.913
			3.80506								126.105
			2.85563								253.883
			4.87313								173.222
			2.92382								271.96
			9.21416
			8.38218
