# Supplementary material for: Hypoxia-induced tracheal elasticity in vector beetle facilitates the loading of pinewood nematode
Source: eLife. 2023 Mar 30;12:e84621. doi: 10.7554/eLife.84621 (PMC10063229; doi:10.7554/eLife.84621)
Supplement: Figure 3—figure supplement 1—source data 1. [file elife-84621-fig3-figsupp1-data1.xlsx]

## Sheet: ECM-develp_2
FPKM values of 45 selected aECM genes
Gene	PAE1-1	PAE1-2	PAE1-3	PAE3-1	PAE3-2	PAE3-3	PAE5-1	PAE5-2	PAE5-3	PAE7-1	PAE7-2	PAE7-3
Mucin91C	17.16	7.72	64.31	88.24	51.25	44.56	15.01	8.92	65.29	6.72	19.55	12.97
Muc5ACl	117.48	44.62	63.07	91.85	55.52	107.72	43.77	17.68	60.98	5.64	11.5	14.24
Muc3A	3.11	4.25	1.85	2.05	3.46	9.15	4.62	2.04	3.53	2.28	2.29	1.7
col4a1a	33.96	32.24	144.29	252.94	341.04	361.33	281.87	166.72	358.37	182.09	162.58	76.57
col4a1b	62.41	55.92	270.83	401.96	568.59	585.72	502.41	266.5	596.34	283.84	244.04	119.78
col4a1c	46.63	39.52	73.94	73.18	23.09	38.68	15.76	38.01	37.26	7.43	5.23	4.42
chitinase7	34.25	10.03	14.63	22.65	27.27	25.25	10.58	6.22	17.82	6.7	7.67	4.41
chitinase2a	5.51	2.97	6.51	4.75	4.26	5.25	4.15	0.97	5.09	1.14	1.91	1.65
chitinase2b	3.14	0.41	872.47	792.19	9.76	42.92	3122.46	8904.69	3.28	9447.82	3885.12	3121.15
chitinase8/4/2	0.02	0.66	34.88	100.02	0.75	0.92	239.41	979.54	0.35	450.96	295.3	202.77
chitinase1	3.84	2.28	18.09	18.97	32.64	18.71	30.1	6.76	11.56	7.86	6.37	4.99
kkv	18.1	17.66	6.2	5.69	7.91	7.85	2.98	2.31	5.27	1.63	3.63	1.66
obstructor-B	343.11	109.51	171.54	259.94	195.09	298.48	109.78	64.56	188.44	33.1	54.04	70.57
obstructor-A	611.06	632.96	130.33	140.71	156.22	209.7	138.55	57.08	194.08	89.22	126.6	139.36
obstuctor-C	611.06	632.96	130.33	140.71	156.22	209.7	138.55	57.08	194.08	89.22	126.6	139.36
obstructor-E1	244.13	1228.38	33.8	46.76	47.49	69.96	62.13	35.85	55.63	30.7	43.32	40.68
obstructor-E2	570.16	218.71	185.05	169.87	129.3	229.64	113.25	184.82	241.4	113.03	60.43	151.96
CDA-like 5	34.06	15.56	14.33	13.7	20.07	21.58	12.52	8.33	15.79	2.76	4.22	4.26
serpentine	848.56	864.36	238.59	331.89	274.59	426.84	338.06	174.96	438.32	189.75	261.68	246.55
CDA-like 4	38.49	19.48	11.08	23.42	20.74	29.86	24.83	8.21	20.3	9.8	19.44	11.31
vermiform	578.22	730.91	192.06	214.86	199.72	306.52	194.23	140.51	253.7	91.37	125.82	97.17
CG14880-like	7.21	12.75	2.82	6.31	6.61	7.84	3.73	3.92	5.85	1.25	2.32	0.9
CG13676-like	76.21	25.97	31.51	49.41	38.04	55.97	21.14	7.77	33.07	11.53	25.37	17.95
trfA-like	254.58	454.96	82.87	65.72	83.83	134.33	71.08	45.07	99.03	14.3	20.57	9.48
DNA ligase 1-like	76.21	25.97	31.51	49.41	38.04	55.97	21.14	7.77	33.07	11.53	25.37	17.95
IMPI-like	12.19	15.5	69.07	30.28	44.14	162.43	68.05	3.78	23.98	15.12	144.77	15.67
Adam-sol narae	15.15	15.58	6.55	8.19	8.74	12.23	3.5	1.48	5.02	1.3	6.38	2.44
Kuzbanian-like	13.35	28.9	4.38	5.42	4.84	6	7.08	3.35	8.19	2.04	4.79	1.98
Dumpy	4.43	2.53	9	14.19	11.07	12.97	24.97	11.29	21.75	8.57	12.2	5.36
Adam-stall	3.52	0.78	7.03	14.95	10.49	4.25	4.93	4.02	5.84	0.79	1.71	2.91
kuzbanian	5.85	11.48	7.06	6.93	13.15	9.8	10.88	5.82	7.26	4.02	4.13	3.16
AdamTS	1.83	0.55	9.08	4.51	3.54	6	5.3	5.95	14.99	2.58	3.68	3.82
MMP1/2	16.9	7.29	31.61	39.75	85.76	45.99	39.59	14.14	39.67	28.03	46.2	18.48
c54254.graph_c0	0.44	0.38	1.11	1.35	0.2	3.73	2.02	3.23	1.87	2.29	0.64	2.19
Laminin B2	4.58	1.37	6.77	5.29	10.94	5.94	4.27	2.97	5.25	3.23	2.63	2.05
ItgaPS4/scab	1.9	0.82	14.5	8.07	39.36	9.62	40.63	3.91	11.43	8.05	5.64	4.73
ItgaPS5/scab	2.69	0.85	15.41	11.94	61.7	15.28	20.09	3.79	5.38	5.58	5.41	1.65
myospheroid/Itgbn	7.84	3	26.73	27.97	82.77	34.17	61.38	8.6	21.11	12.85	11.41	7.21
Cad99C	20.18	10.35	4.53	5.7	6	7.68	4.38	2.46	5.45	1.4	5.15	1.87
shotgun	6.3	6.39	6.61	7.12	7.77	8.45	6.93	9.61	8.81	4.29	7.49	2.84
Calsyntenin	72.73	87.84	37.82	48.5	36.83	51.51	48.35	54.41	44.53	26.36	53.63	26.82
Cad96Ca	4.43	3.35	2.74	5.35	3.92	5.7	5.49	3.13	5.5	2.61	6.27	2.6
Cad87A/74A	13.9	8.54	6.87	7.38	9.51	8.49	7.99	3.79	6.58	2.27	3.22	1.93
DIP	0.99	0.4	5.79	8.96	19.21	12.88	16.52	10.85	20.88	14.21	21.42	10.93
klingon	1.12	1.05	14.66	28.98	29.36	17.22	61.32	43.12	24.63	48.86	18.26	26.03
