# Supplementary material for: Hypoxia-induced tracheal elasticity in vector beetle facilitates the loading of pinewood nematode
Source: eLife. 2023 Mar 30;12:e84621. doi: 10.7554/eLife.84621 (PMC10063229; doi:10.7554/eLife.84621)
Supplement: Figure 3—source data 1. [file elife-84621-fig3-data1.xlsx]

## Sheet: DEGs for Fig. 3A
#ID	CK1_Count	CK2_Count	CK3_Count	Bx1_Count	Bx2_Count	Bx3_Count	CK1_FPKM	CK2_FPKM	CK3_FPKM	Bx1_FPKM	Bx2_FPKM	Bx3_FPKM	FDR	log2FC	regulated	COG_class	COG_class_annotation	GO_annotation	KEGG_annotation	KOG_class	KOG_class_annotation	Pfam_annotation	Swissprot_annotation	eggNOG_class	eggNOG_class_annotation	nr_annotation
c58626.graph_c0	172	430	350	25923	226724	219926	7.86	16.73	13.3	950.99	9873.65	8319.8	5.65331e-37	8.96662	up	--	--	--	--	--	--	Haemolymph juvenile hormone binding protein (JHBP)	Protein takeout OS=Drosophila melanogaster OX=7227 GN=to PE=2 SV=1	S	Function unknown	protein takeout [Anoplophora glabripennis]
c55763.graph_c0	547	962	997	157854	216759	579388	48.27	87.54	70.86	10839.8	19140.9	52295.3	1.18538e-56	8.64031	up	--	--	Molecular Function: odorant binding (GO:0005549);;	--	--	--	PBP/GOBP family	--	--	--	uncharacterized protein LOC108906297 [Anoplophora glabripennis]
c56448.graph_c0	346	396	184	17958	125406	122852	63.62	58.42	29.28	2479.46	20052.9	20630.3	6.58079e-32	8.13624	up	--	--	--	--	--	--	Insect pheromone-binding family, A10/OS-D	Ejaculatory bulb-specific protein 3 OS=Drosophila melanogaster OX=7227 GN=EbpIII PE=2 SV=2	S	Function unknown	chemosensory protein 11, partial [Monochamus alternatus]
c58969.graph_c0	431	918	667	54648	114263	242644	15.23	25.92	20.19	1503.96	3696.56	8250.13	4.88861e-42	7.75367	up	[X]	Mobilome: prophages, transposons	Molecular Function: odorant binding (GO:0005549);;	--	[R]	General function prediction only	PBP/GOBP family	Probable RNA-directed DNA polymerase from transposon X-element OS=Drosophila melanogaster OX=7227 GN=X-element\ORF2 PE=3 SV=1	S	Function unknown	PREDICTED: RNA-directed DNA polymerase from mobile element jockey-like [Diaphorina citri]
c58667.graph_c2	149	325	140	25179	19484	34207	4.02	6.94	3.14	505.17	468.89	847.93	1.48658e-60	7.09474	up	--	--	Cellular Component: extracellular region (GO:0005576);; Biological Process: killing of cells of other organism (GO:0031640);; Biological Process: defense response to fungus (GO:0050832);;	--	--	--	Antifungal peptide	Antimicrobial peptide Alo-2 OS=Acrocinus longimanus OX=227548 PE=1 SV=1	--	--	PREDICTED: antimicrobial peptide 1-like isoform X1 [Agrilus planipennis]
c56224.graph_c0	152	158	153	20064	17052	13574	3.11	2.36	2.32	281.76	278.11	260.18	5.30035e-125	6.84613	up	--	--	Cellular Component: integral component of membrane (GO:0016021);; Molecular Function: transferase activity, transferring acyl groups other than amino-acyl groups (GO:0016747);;	--	[R]	General function prediction only	Acyltransferase family	Nose resistant to fluoxetine protein 6 OS=Caenorhabditis elegans OX=6239 GN=nrf-6 PE=1 SV=3	S	Function unknown	nose resistant to fluoxetine protein 6-like [Anoplophora glabripennis]
c38144.graph_c0	940	1454	2180	57457	123458	130278	123.82	154.28	249.06	5730.8	14338.7	15884.1	6.76093e-40	6.20737	up	--	--	--	--	--	--	Insect pheromone-binding family, A10/OS-D	Ejaculatory bulb-specific protein 3 OS=Drosophila melanogaster OX=7227 GN=EbpIII PE=2 SV=2	S	Function unknown	chemosensory protein 5 [Monochamus alternatus]
c55853.graph_c0	458	362	547	17011	26133	40489	12.56	7.67	13.91	388.49	684.67	1054.61	1.20342e-39	6.01032	up	--	--	Cellular Component: integral component of membrane (GO:0016021);; Biological Process: transmembrane transport (GO:0055085);;	--	[U]	Intracellular trafficking, secretion, and vesicular transport	Major Facilitator Superfamily;; Major Facilitator Superfamily;; MFS_1 like family	--	G	Carbohydrate transport and metabolism	MFS-type transporter SLC18B1-like, partial [Anoplophora glabripennis]
c41168.graph_c0	442	576	468	14728	32561	26836	75.58	79.11	69.29	1895.06	4858.27	4204.79	3.89349e-43	5.74229	up	--	--	--	--	--	--	--	--	--	--	glycine-rich cell wall structural protein-like isoform X3 [Anoplophora glabripennis]
c52898.graph_c0	397	535	408	8094	25474	29602	18.06	19.72	16.2	282.7	1048.12	1276.56	5.13091e-26	5.64981	up	--	--	--	--	--	--	--	--	--	--	uncharacterized protein LOC108905487 [Anoplophora glabripennis]
c58975.graph_c0	222	227	263	5467	11743	11170	12.79	11.11	9.28	60.14	142.58	143.9	1.76822e-36	5.41387	up	[P]	Inorganic ion transport and metabolism	Cellular Component: integral component of membrane (GO:0016021);; Biological Process: transmembrane transport (GO:0055085);;	--	[G]	Carbohydrate transport and metabolism	Major Facilitator Superfamily;; Sugar (and other) transporter;; Uncharacterised MFS-type transporter YbfB	--	G	Carbohydrate transport and metabolism	monocarboxylate transporter 12 [Anoplophora glabripennis]
c43073.graph_c0	149	132	266	16	30757	1488	18.62	13.23	29.12	1.52	3386.13	172.42	0.00622257	5.13493	up	--	--	--	--	--	--	Ricin-type beta-trefoil lectin domain-like	--	S	Function unknown	uncharacterized protein LOC108908495 [Anoplophora glabripennis]
c46907.graph_c0	453	705	824	11128	24651	21692	27.87	35.13	44.07	524.5	1363.9	1259.15	2.57508e-30	4.98719	up	--	--	--	--	--	--	Insect cuticle protein	Cuticle protein 7 OS=Blaberus craniifer OX=6982 PE=1 SV=1	S	Function unknown	cuticle protein 16.8 [Anoplophora glabripennis]
c54841.graph_c0	3164	4041	2753	93737	81369	118837	76.9	80.06	58.43	1764.43	1911.72	2774.23	1.81661e-49	4.97777	up	[I]	Lipid transport and metabolism	Molecular Function: hydrolase activity (GO:0016787);;	--	[R]	General function prediction only	Carboxylesterase family	Esterase FE4 OS=Myzus persicae OX=13164 PE=1 SV=1	I	Lipid transport and metabolism	venom carboxylesterase-6-like [Anoplophora glabripennis]
c24852.graph_c0	803	1160	1636	13088	37118	37578	132.22	153.48	233.27	1623.19	5341.58	5678.7	3.80752e-20	4.73471	up	--	--	Molecular Function: structural constituent of cuticle (GO:0042302);;	--	--	--	Insect cuticle protein	Flexible cuticle protein 12 OS=Hyalophora cecropia OX=7123 GN=CP12 PE=2 SV=1	S	Function unknown	PREDICTED: flexible cuticle protein 12-like [Nicrophorus vespilloides]
c53284.graph_c0	220	329	654	4921	9975	14285	4.71	5.73	12.26	80.94	193.71	291.04	7.89216e-18	4.72945	up	[R]	General function prediction only	--	--	--	--	von Willebrand factor type A domain;; von Willebrand factor type A domain;; von Willebrand factor type A domain;; Vault protein inter-alpha-trypsin domain	--	S	Function unknown	inter-alpha-trypsin inhibitor heavy chain H4-like isoform X1 [Anoplophora glabripennis]
c52617.graph_c0	277	605	263	8209	8168	11083	11.38	20.52	9.36	283.44	332.84	469.85	3.11106e-29	4.70154	up	--	--	--	--	--	--	WAP-type (Whey Acidic Protein) 'four-disulfide core'	--	S	Function unknown	WAP four-disulfide core domain protein 2-like [Anoplophora glabripennis]
c56968.graph_c0	3420	6821	5893	65535	174449	134089	70.13	114.28	104.19	1013.98	3144.43	2616.86	5.92658e-23	4.672	up	--	--	--	--	--	--	--	--	--	--	transcription factor TBF1-like [Anoplophora glabripennis]
c55267.graph_c0	260	452	442	4183	12192	10483	7.38	10.41	10.92	91.43	313.99	283.16	4.04792e-21	4.67122	up	--	--	--	--	--	--	Insect pheromone-binding family, A10/OS-D	Ejaculatory bulb-specific protein 3 OS=Drosophila melanogaster OX=7227 GN=EbpIII PE=2 SV=2	S	Function unknown	chemosensory protein 1 [Monochamus alternatus]
c38457.graph_c0	721	1827	1624	17151	31370	40791	65.84	134.73	128.61	1192.39	2551.33	3481.45	3.19591e-21	4.57013	up	--	--	--	--	--	--	Insect pheromone-binding family, A10/OS-D	Ejaculatory bulb-specific protein 3 OS=Drosophila melanogaster OX=7227 GN=EbpIII PE=2 SV=2	S	Function unknown	chemosensory protein 10, partial [Monochamus alternatus]
c55127.graph_c1	295	391	392	1535	7923	14379	13.84	14.56	15.45	51.9	309.54	584.89	4.52678e-11	4.55415	up	--	--	--	--	[A]	RNA processing and modification	LSM domain	--	K	Transcription	U7 snRNA-associated Sm-like protein LSm10 [Anoplophora glabripennis]
c58315.graph_c0	828	802	753	13157	23614	14244	23	19.32	19.87	259.48	493.22	415.27	9.55942e-31	4.50483	up	--	--	Cellular Component: membrane (GO:0016020);;	K14209|1.18668e-179|tca:664514|K14209 solute carrier family 36 (proton-coupled amino acid transporter) | (RefSeq) proton-coupled amino acid transporter 4	[E]	Amino acid transport and metabolism	Transmembrane amino acid transporter protein	Proton-coupled amino acid transporter-like protein pathetic OS=Drosophila melanogaster OX=7227 GN=path PE=1 SV=1	E	Amino acid transport and metabolism	proton-coupled amino acid transporter-like protein pathetic isoform X1 [Anoplophora glabripennis]
c58369.graph_c0	1145	2113	2188	17706	44677	46422	286.46	422.02	472.73	3292.92	9574.77	10445	6.67355e-20	4.45997	up	--	--	--	--	--	--	--	--	--	--	glycine-rich protein 5-like [Anoplophora glabripennis]
c55999.graph_c0	770	567	421	8568	12940	15632	17.69	10.6	8.4	151.03	270.07	342.03	1.29145e-21	4.45076	up	[G]	Carbohydrate transport and metabolism	Cellular Component: integral component of membrane (GO:0016021);; Biological Process: transmembrane transport (GO:0055085);;	--	[G]	Carbohydrate transport and metabolism	Major Facilitator Superfamily;; Sugar (and other) transporter	--	G	Carbohydrate transport and metabolism	uncharacterized protein LOC108910200 [Anoplophora glabripennis]
c57404.graph_c1	1177	2358	2397	20959	38810	53146	43.52	70.59	76.94	594.83	1296.78	1865.56	1.50413e-20	4.39524	up	[T]	Signal transduction mechanisms	--	--	--	--	Ankyrin repeats (3 copies);; Ankyrin repeats (many copies);; Ankyrin repeats (many copies);; Ankyrin repeat;; Ankyrin repeat;; NACHT domain	Ankyrin repeat, PH and SEC7 domain containing protein secG OS=Dictyostelium discoideum OX=44689 GN=secG PE=2 SV=1	S	Function unknown	uncharacterized protein LOC108905920 [Anoplophora glabripennis]
c51522.graph_c0	226	503	333	3932	8523	7206	3.49	6.22	4.4	46.02	123.09	108.2	8.69566e-22	4.35085	up	--	--	Cellular Component: extracellular region (GO:0005576);; Biological Process: carbohydrate metabolic process (GO:0005975);; Biological Process: chitin metabolic process (GO:0006030);; Molecular Function: chitin binding (GO:0008061);; Molecular Function: hydrolase activity, acting on carbon-nitrogen (but not peptide) bonds (GO:0016810);;	--	--	--	Chitin binding Peritrophin-A domain;; Polysaccharide deacetylase	--	S	Function unknown	uncharacterized protein LOC108909440 isoform X5 [Anoplophora glabripennis]
c52325.graph_c0	135	180	136	1562	3884	2675	6.47	6.96	5.68	57.06	168.5	121.54	5.35049e-21	4.27897	up	--	--	--	--	--	--	--	Rhythmically expressed gene 5 protein OS=Drosophila melanogaster OX=7227 GN=Reg-5 PE=2 SV=2	S	Function unknown	rhythmically expressed gene 5 protein [Anoplophora glabripennis]
c52102.graph_c0	116	472	388	2196	7598	6620	4.09	13.55	11.9	59.3	241.56	220.8	5.49162e-12	4.22865	up	[G]	Carbohydrate transport and metabolism	Molecular Function: hydrolase activity, hydrolyzing O-glycosyl compounds (GO:0004553);; Biological Process: carbohydrate metabolic process (GO:0005975);;	--	[G]	Carbohydrate transport and metabolism	Glycosyl hydrolase family 1	Myrosinase 1 OS=Brevicoryne brassicae OX=69196 PE=1 SV=1	G	Carbohydrate transport and metabolism	myrosinase 1 [Anoplophora glabripennis]
c48100.graph_c0	951	1646	1058	15880	17180	28959	81.53	113.92	78.69	1037.44	1321.32	2336.33	6.23015e-25	4.20861	up	--	--	--	--	--	--	--	--	--	--	keratin, type II cytoskeletal 1-like isoform X1 [Anoplophora glabripennis]
c48882.graph_c0	836	1670	1110	20563	11218	28124	57.51	91.15	65.57	1060.98	679	1786.06	6.13878e-21	4.1639	up	--	--	--	--	[K]	Transcription	Pyridoxamine 5'-phosphate oxidase	--	S	Function unknown	protein CREG1-like [Anoplophora glabripennis]
c57324.graph_c0	129	130	214	4260	2386	1478	3.46	1.83	3.91	63.36	40.29	29.1	3.11248e-20	4.15271	up	[U]	Intracellular trafficking, secretion, and vesicular transport	Molecular Function: protein serine/threonine kinase activity (GO:0004674);; Molecular Function: ATP binding (GO:0005524);; Biological Process: protein phosphorylation (GO:0006468);;	K04445|0|tca:658616|K04445 ribosomal protein S6 kinase alpha-5 [EC:2.7.11.1] | (RefSeq) ribosomal protein S6 kinase alpha-5	[T]	Signal transduction mechanisms	Protein kinase domain;; Protein tyrosine kinase;; Kinase-like;; Phosphotransferase enzyme family;; Lipopolysaccharide kinase (Kdo/WaaP) family;; Protein kinase C terminal domain	Putative ribosomal protein S6 kinase alpha-2 OS=Caenorhabditis elegans OX=6239 GN=rskn-2 PE=3 SV=2	T	Signal transduction mechanisms	ribosomal protein S6 kinase alpha-5 isoform X2 [Anoplophora glabripennis]
c54376.graph_c1	336	282	223	2428	6664	4400	13.04	9.07	7.26	72.92	224.78	161.6	7.04984e-16	4.07152	up	--	--	Molecular Function: carbohydrate binding (GO:0030246);;	--	[TV]	--	--	--	S	Function unknown	uncharacterized protein LOC108903620 [Anoplophora glabripennis]
c54811.graph_c1	3268	4674	3656	54558	59997	62617	41.18	50.79	38.6	542.79	687.18	826.61	1.58427e-46	4.05176	up	[G]	Carbohydrate transport and metabolism	--	--	--	--	Major royal jelly protein	Protein yellow OS=Drosophila pseudoobscura pseudoobscura OX=46245 GN=y PE=3 SV=2	G	Carbohydrate transport and metabolism	major royal jelly protein 1-like [Anoplophora glabripennis]
c53141.graph_c0	265	146	592	4048	7093	4057	13.26	4.76	23.5	162.92	342.65	203.06	1.00491e-12	4.00186	up	--	--	Cellular Component: extracellular region (GO:0005576);; Biological Process: killing of cells of other organism (GO:0031640);; Biological Process: defense response to fungus (GO:0050832);;	--	--	--	Antifungal peptide	Antimicrobial peptide Alo-2 OS=Acrocinus longimanus OX=227548 PE=1 SV=1	--	--	PREDICTED: antimicrobial peptide 1-like isoform X1 [Agrilus planipennis]
c43129.graph_c0	167	190	143	863	4271	2189	14.32	13.17	10.65	56.45	327.03	175.89	2.99572e-11	3.958	up	--	--	Biological Process: proteolysis (GO:0006508);; Molecular Function: peptidase activity (GO:0008233);;	--	--	--	Trypsin Inhibitor like cysteine rich domain	Inducible metalloproteinase inhibitor protein OS=Galleria mellonella OX=7137 GN=IMPI PE=1 SV=2	S	Function unknown	inducible metalloproteinase inhibitor protein-like [Anoplophora glabripennis]
c56186.graph_c0	911	1299	1636	5227	19203	29692	41.38	51.5	72.9	215.95	940.77	1526.22	1.54839e-10	3.93872	up	--	--	--	--	--	--	Transposase protein;; THAP domain	Transposable element P transposase OS=Drosophila melanogaster OX=7227 GN=T PE=1 SV=2	S	Function unknown	uncharacterized protein LOC108907286, partial [Anoplophora glabripennis]
c57541.graph_c0	2251	2473	3204	19753	30169	61858	109.13	103.67	132.83	1349.04	2609.25	6114.71	9.44293e-15	3.93115	up	--	--	--	--	--	--	Trypsin Inhibitor like cysteine rich domain	--	--	--	chymotrypsin-elastase inhibitor ixodidin [Anoplophora glabripennis]
c55349.graph_c1	183	313	248	6458	1460	2306	2.86	4.06	3.31	75.51	20.35	34.68	9.98532e-13	3.81514	up	--	--	Molecular Function: metallopeptidase activity (GO:0008237);;	--	[O]	Posttranslational modification, protein turnover, chaperones	Metallo-peptidase family M12B Reprolysin-like;; Metallo-peptidase family M12B Reprolysin-like;; Reprolysin (M12B) family zinc metalloprotease;; Metallo-peptidase family M12;; Metallo-peptidase family M12B Reprolysin-like	Venom metalloproteinase 3 OS=Eulophus pennicornis OX=108749 PE=2 SV=1	S	Function unknown	A disintegrin and metalloproteinase with thrombospondin motifs 16 isoform X1 [Anoplophora glabripennis]
c55348.graph_c0	261	200	312	1450	4589	3934	6.56	4.12	6.8	28.05	107.82	100.29	1.1526e-12	3.78192	up	[IR]	Lipid transport and metabolism ;; General function prediction only	Molecular Function: oxidoreductase activity (GO:0016491);;	--	[R]	General function prediction only	GMC oxidoreductase;; GMC oxidoreductase;; GMC oxidoreductase	Glucose dehydrogenase [FAD, quinone] OS=Drosophila pseudoobscura pseudoobscura OX=46245 GN=Gld PE=3 SV=4	E	Amino acid transport and metabolism	glucose dehydrogenase [FAD, quinone] [Anoplophora glabripennis]
c49632.graph_c0	159	188	273	1767	2126	3803	3.12	3.06	4.66	26.92	38.13	72.41	5.22694e-17	3.75687	up	[E]	Amino acid transport and metabolism	Cellular Component: integral component of plasma membrane (GO:0005887);; Molecular Function: L-amino acid transmembrane transporter activity (GO:0015179);; Molecular Function: antiporter activity (GO:0015297);; Biological Process: L-alpha-amino acid transmembrane transport (GO:1902475);;	K13868|0|tca:660811|K13868 solute carrier family 7 (L-type amino acid transporter), member 9 | (RefSeq) b(0,+)-type amino acid transporter 1	[E]	Amino acid transport and metabolism	Amino acid permease;; Amino acid permease	--	E	Amino acid transport and metabolism	b(0,+)-type amino acid transporter 1 isoform X2 [Anoplophora glabripennis]
c58955.graph_c0	1451	2103	2737	23561	22771	28074	31.81	38.73	52.44	422.51	424.06	664.36	2.59038e-30	3.69492	up	[Q]	Secondary metabolites biosynthesis, transport and catabolism	Biological Process: polysaccharide catabolic process (GO:0000272);; Molecular Function: hydrolase activity, hydrolyzing O-glycosyl compounds (GO:0004553);;	K01179|1.95959e-155|tca:655607|K01179 endoglucanase [EC:3.2.1.4] | (RefSeq) endoglucanase F	--	--	Glycosyl hydrolase family 9	Endoglucanase OS=Dictyostelium discoideum OX=44689 GN=celA PE=2 SV=1	G	Carbohydrate transport and metabolism	uncharacterized protein LOC108908596 isoform X3 [Anoplophora glabripennis]
c55565.graph_c1	1121	1357	1111	5423	12962	22896	266.49	255.65	228.68	967.21	2678.55	4980.48	6.77858e-11	3.63278	up	--	--	--	--	[R]	General function prediction only	Reverse transcriptase (RNA-dependent DNA polymerase)	Probable RNA-directed DNA polymerase from transposon BS OS=Drosophila melanogaster OX=7227 GN=RTase PE=2 SV=1	S	Function unknown	PREDICTED: RNA-directed DNA polymerase from mobile element jockey-like isoform X1 [Amyelois transitella]
c58709.graph_c0	586	557	409	2768	8174	7124	29.6	21.72	17.94	104.64	337.56	340.21	3.32044e-12	3.62548	up	[O]	Posttranslational modification, protein turnover, chaperones	Molecular Function: carbohydrate binding (GO:0030246);;	--	[TV]	--	PPIC-type PPIASE domain;; PPIC-type PPIASE domain	--	S	Function unknown	uncharacterized protein LOC108903620 [Anoplophora glabripennis]
c52665.graph_c0	790	593	695	5011	8825	10119	24.5	15.08	18.36	124.14	258.05	309.97	3.51557e-16	3.61087	up	--	--	Cellular Component: integral component of membrane (GO:0016021);; Biological Process: metal ion transport (GO:0030001);; Molecular Function: metal ion transmembrane transporter activity (GO:0046873);; Biological Process: transmembrane transport (GO:0055085);;	K14715|3.13101e-130|tca:661597|K14715 solute carrier family 39 (zinc transporter), member 9 | (RefSeq) zinc transporter ZIP9	[U]	Intracellular trafficking, secretion, and vesicular transport	ZIP Zinc transporter	--	P	Inorganic ion transport and metabolism	zinc transporter ZIP9 isoform X1 [Anoplophora glabripennis]
c53555.graph_c0	356	261	187	2751	1677	4842	8.87	5.3	4.07	52.9	37.82	114.94	2.72602e-11	3.56433	up	[E]	Amino acid transport and metabolism	Molecular Function: carboxypeptidase activity (GO:0004180);; Biological Process: proteolysis (GO:0006508);; Molecular Function: metallopeptidase activity (GO:0008237);; Molecular Function: peptidyl-dipeptidase activity (GO:0008241);; Biological Process: cellular process (GO:0009987);; Cellular Component: membrane (GO:0016020);; Molecular Function: lyase activity (GO:0016829);; Biological Process:…	K01283|0|tca:658047|K01283 peptidyl-dipeptidase A [EC:3.4.15.1] | (RefSeq) angiotensin-converting enzyme	[E]	Amino acid transport and metabolism	Angiotensin-converting enzyme	Angiotensin-converting enzyme OS=Theromyzon tessulatum OX=13286 GN=ACE PE=2 SV=1	S	Function unknown	angiotensin-converting enzyme-like isoform X1 [Anoplophora glabripennis]
c35343.graph_c0	1652	1446	2613	10272	23024	27597	92.56	65.64	127.22	441.06	1161.21	1460.14	1.94317e-12	3.52869	up	--	--	--	--	--	--	--	--	S	Function unknown	uncharacterized protein LOC108907392 [Anoplophora glabripennis]
c56381.graph_c2	6075	12058	10024	75659	124433	93865	159.04	255.63	227.5	1547.26	2987.46	2331.92	6.02843e-21	3.52843	up	--	--	Cellular Component: membrane (GO:0016020);;	--	--	--	--	--	S	Function unknown	bromodomain-containing protein DDB_G0280777 [Anoplophora glabripennis]
c50099.graph_c0	769	1375	891	15829	5084	11465	75.23	109.14	76.62	1121.43	448.72	1003.76	2.79242e-14	3.49463	up	--	--	--	--	--	--	Antifungal peptide	Antimicrobial peptide Alo-3 OS=Acrocinus longimanus OX=227548 PE=1 SV=1	--	--	antimicrobial peptide Alo-2-like [Trichogramma pretiosum]
c58268.graph_c3	335	277	252	3974	2696	2664	5.77	3.89	3.79	52.53	41.95	43.84	6.20778e-23	3.48583	up	[Q]	Secondary metabolites biosynthesis, transport and catabolism	Molecular Function: catalytic activity (GO:0003824);; Biological Process: metabolic process (GO:0008152);;	--	[Q]	Secondary metabolites biosynthesis, transport and catabolism	AMP-binding enzyme	Acetyl-coenzyme A synthetase OS=Drosophila melanogaster OX=7227 GN=AcCoAS PE=2 SV=1	Q	Secondary metabolites biosynthesis, transport and catabolism	uncharacterized protein LOC108908938 [Anoplophora glabripennis]
c50844.graph_c0	117	202	169	1822	1701	1375	18.04	25.09	22.35	212.63	219.82	194.07	4.1437e-31	3.44706	up	--	--	--	--	--	--	--	--	--	--	Ras-related protein Rab-34, isoform NARR [Mizuhopecten yessoensis]
c59649.graph_c0	1433	1631	1201	36675	4757	5540	5.91	5.47	4.32	116.91	17.9	21.86	1.72004e-06	3.40424	up	--	--	Molecular Function: UDP-glycosyltransferase activity (GO:0008194);; Cellular Component: membrane (GO:0016020);;	K00771|0|tca:657929|K00771 protein xylosyltransferase [EC:2.4.2.26] | (RefSeq) xylosyltransferase oxt	[G]	Carbohydrate transport and metabolism	Core-2/I-Branching enzyme;; Xylosyltransferase C terminal;; WSC domain	Xylosyltransferase oxt OS=Drosophila pseudoobscura pseudoobscura OX=46245 GN=oxt PE=2 SV=1	S	Function unknown	xylosyltransferase oxt [Anoplophora glabripennis]
c54626.graph_c0	693	1083	815	4203	9040	10208	20.87	26.66	21.56	97.98	248.13	294.78	3.95948e-13	3.31211	up	[O]	Posttranslational modification, protein turnover, chaperones	Molecular Function: peptidase activity (GO:0008233);;	--	[E]	Amino acid transport and metabolism	Trypsin	Serine protease snake OS=Drosophila melanogaster OX=7227 GN=snk PE=1 SV=2	O	Posttranslational modification, protein turnover, chaperones	serine protease snake-like isoform X1 [Anoplophora glabripennis]
c59384.graph_c0	151	304	285	1588	2426	2565	1.17	1.92	1.94	13.79	26.38	29.07	9.18668e-17	3.30268	up	[O]	Posttranslational modification, protein turnover, chaperones	Molecular Function: peptidase activity (GO:0008233);;	--	[E]	Amino acid transport and metabolism	Trypsin;; Serine protease gd N-terminus;; Trypsin;; Serine protease gd N-terminus;; Ribosomal protein L34	Serine protease gd OS=Drosophila melanogaster OX=7227 GN=gd PE=1 SV=2	O	Posttranslational modification, protein turnover, chaperones	limulus clotting factor C-like [Anoplophora glabripennis]
c53763.graph_c0	360	448	546	3101	4966	3977	7.72	7.8	10.19	51.27	96.84	81.34	2.98978e-20	3.27972	up	--	--	Cellular Component: integral component of membrane (GO:0016021);;	--	[D]	Cell cycle control, cell division, chromosome partitioning	Electron transfer DM13;; DOMON domain	Protein Skeletor, isoforms B/C OS=Drosophila melanogaster OX=7227 GN=Skeletor PE=1 SV=2	S	Function unknown	protein Skeletor, isoforms B/C [Anoplophora glabripennis]
c52836.graph_c1	202	264	147	848	1618	2869	7.21	9.82	5.1	15.66	31.94	57.38	3.60394e-09	3.22844	up	[E]	Amino acid transport and metabolism	Molecular Function: aspartate 1-decarboxylase activity (GO:0004068);; Biological Process: carboxylic acid metabolic process (GO:0019752);; Molecular Function: pyridoxal phosphate binding (GO:0030170);;	--	[E]	Amino acid transport and metabolism	Pyridoxal-dependent decarboxylase conserved domain;; Beta-eliminating lyase;; Aminotransferase class-V	Glutamate decarboxylase OS=Drosophila melanogaster OX=7227 GN=Gad1 PE=2 SV=2	E	Amino acid transport and metabolism	cysteine sulfinic acid decarboxylase [Anoplophora glabripennis]
c47613.graph_c0	288	342	340	2367	3423	2578	15.66	15.12	16.11	98.95	168.09	132.73	5.80941e-23	3.22356	up	--	--	--	--	--	--	Serpin (serine protease inhibitor)	--	O	Posttranslational modification, protein turnover, chaperones	uncharacterized protein LOC108910995 [Anoplophora glabripennis]
c58136.graph_c0	145	110	139	1376	1167	950	3.26	2.14	2.62	21.67	22.77	20.93	1.76901e-20	3.21544	up	[R]	General function prediction only	--	K09215|2.91071e-179|tca:660842|K09215 odd-skipped | (RefSeq) bowel, bowl; protein bowel	[R]	General function prediction only	Zinc finger, C2H2 type;; Zinc-finger double domain;; C2H2-type zinc finger;; C2H2-type zinc finger;; Zinc-finger of C2H2 type;; Zinc-finger double-stranded RNA-binding	Protein bowel OS=Drosophila melanogaster OX=7227 GN=bowl PE=1 SV=1	S	Function unknown	protein bowel [Anoplophora glabripennis]
c49483.graph_c0	283	370	268	2307	2693	2877	14.7	15.57	12.1	91.94	126.09	141.31	4.4254e-23	3.20915	up	--	--	Molecular Function: transcription coactivator activity (GO:0003713);; Cellular Component: nucleus (GO:0005634);; Biological Process: regulation of nucleic acid-templated transcription (GO:1903506);;	--	[K]	Transcription	Core binding factor beta subunit	Protein big brother OS=Drosophila melanogaster OX=7227 GN=Bgb PE=2 SV=3	K	Transcription	protein big brother [Anoplophora glabripennis]
c51590.graph_c1	597	742	893	10789	4919	4042	8.82	9.21	10.99	145.82	76.77	68.13	2.20278e-14	3.20856	up	[G]	Carbohydrate transport and metabolism	Molecular Function: chitinase activity (GO:0004568);; Cellular Component: extracellular region (GO:0005576);; Biological Process: carbohydrate metabolic process (GO:0005975);; Biological Process: chitin catabolic process (GO:0006032);; Molecular Function: chitin binding (GO:0008061);;	K01183|0|tca:660881|K01183 chitinase [EC:3.2.1.14] | (RefSeq) Cht7, TcCht7; chitinase 7	[G]	Carbohydrate transport and metabolism	Glycosyl hydrolases family 18;; Chitin binding Peritrophin-A domain	Probable chitinase 10 OS=Drosophila melanogaster OX=7227 GN=Cht10 PE=2 SV=2	G	Carbohydrate transport and metabolism	probable chitinase 10 [Anoplophora glabripennis]
c56984.graph_c0	2582	3409	22593	73515	85505	83547	523.76	559.71	4384.25	12143.6	16635.8	17143.8	1.36609e-05	3.20385	up	--	--	--	--	[R]	General function prediction only	Integrase core domain	Uncharacterized protein K02A2.6 OS=Caenorhabditis elegans OX=6239 GN=K02A2.6 PE=4 SV=1	S	Function unknown	PREDICTED: uncharacterized protein K02A2.6-like [Papilio xuthus]
c43501.graph_c0	787	1017	757	5277	6793	9420	58.41	61.07	48.81	299.38	451.7	657.23	1.49179e-16	3.18579	up	--	--	--	K20694|7.80203e-08|tca:103315108|K20694 protein spaetzle | (RefSeq) uncharacterized LOC103315108	--	--	Spaetzle	Protein spaetzle OS=Drosophila melanogaster OX=7227 GN=spz PE=1 SV=3	S	Function unknown	uncharacterized protein LOC108913750 isoform X1 [Anoplophora glabripennis]
c56811.graph_c0	1448	1825	1879	19884	14587	9508	29.6	30.23	33.97	317.97	266.09	180.27	8.50223e-21	3.17929	up	--	--	Molecular Function: receptor activity (GO:0004872);; Cellular Component: lysosome (GO:0005764);; Cellular Component: integral component of membrane (GO:0016021);;	--	[T]	Signal transduction mechanisms	CD36 family	Protein croquemort OS=Drosophila melanogaster OX=7227 GN=crq PE=1 SV=3	U	Intracellular trafficking, secretion, and vesicular transport	scavenger receptor class B member 1 isoform X2 [Anoplophora glabripennis]
c51164.graph_c0	1083	1858	1534	6234	14618	15621	34.9	48.63	43.03	154.66	427.18	478.77	1.23978e-11	3.17106	up	--	--	--	--	--	--	--	--	S	Function unknown	uncharacterized protein LOC108917057 [Anoplophora glabripennis]
c54127.graph_c0	180	309	331	907	2818	2904	5.49	7.57	8.68	20.88	74.93	82.85	3.25309e-09	3.16276	up	[G]	Carbohydrate transport and metabolism	Cellular Component: integral component of membrane (GO:0016021);; Molecular Function: transmembrane transporter activity (GO:0022857);; Biological Process: transmembrane transport (GO:0055085);;	--	[R]	General function prediction only	Major Facilitator Superfamily;; Sugar (and other) transporter	Organic cation transporter-like protein OS=Drosophila melanogaster OX=7227 GN=Orct2 PE=2 SV=2	G	Carbohydrate transport and metabolism	synaptic vesicle glycoprotein 2B-like [Anoplophora glabripennis]
c54215.graph_c0	119	310	275	943	2454	2181	1.78	3.81	3.63	10.96	34.07	31.38	1.12206e-09	3.14946	up	[K]	Transcription	--	--	[R]	General function prediction only	Leucine rich repeat;; Leucine Rich repeats (2 copies);; Leucine rich repeats (6 copies);; Leucine Rich Repeat;; Leucine Rich repeat;; Leucine-rich repeat	Protein artichoke OS=Drosophila melanogaster OX=7227 GN=atk PE=1 SV=2	S	Function unknown	protein artichoke [Anoplophora glabripennis]
c22462.graph_c0	103	131	110	57	2279	530	5.6	5.77	5.21	2.38	111.65	27.24	0.00126136	3.11374	up	--	--	--	--	--	--	Insect cuticle protein	Pupal cuticle protein Edg-78E OS=Drosophila melanogaster OX=7227 GN=Edg78E PE=2 SV=1	S	Function unknown	uncharacterized protein LOC108907888 [Anoplophora glabripennis]
c54143.graph_c0	193	271	649	4515	4319	285	1.98	2.26	5.81	35.83	40.48	2.8	0.000250605	3.06814	up	--	--	--	--	--	--	--	--	S	Function unknown	titin [Anoplophora glabripennis]
c58943.graph_c0	160	236	317	1317	2844	1275	1.82	2.21	3.16	11.59	29.45	13.93	6.32753e-11	3.06089	up	--	--	Biological Process: single-organism process (GO:0044699);;	K05635|0|tca:657051|K05635 laminin, gamma 1 | (RefSeq) laminin subunit gamma-1	[W]	Extracellular structures	Laminin EGF domain;; Laminin B (Domain IV)	Laminin subunit gamma-1 OS=Drosophila melanogaster OX=7227 GN=LanB2 PE=2 SV=2	S	Function unknown	laminin subunit gamma-1-like isoform X1 [Anoplophora glabripennis]
c49976.graph_c0	227	272	363	1000	2450	3060	11.49	11.58	16.21	40.24	112.78	147.1	1.98744e-09	3.04988	up	--	--	--	--	[E]	Amino acid transport and metabolism	Trypsin	Venom peptide isomerase heavy chain OS=Agelenopsis aperta OX=6908 PE=1 SV=1	O	Posttranslational modification, protein turnover, chaperones	venom peptide isomerase heavy chain-like [Anoplophora glabripennis]
c59173.graph_c2	133	180	237	1083	1101	1968	5.65	6.2	8.76	35.39	42.29	79.32	3.91454e-13	3.04847	up	--	--	Molecular Function: copper ion binding (GO:0005507);; Biological Process: peptide metabolic process (GO:0006518);; Cellular Component: membrane (GO:0016020);; Molecular Function: oxidoreductase activity, acting on paired donors, with incorporation or reduction of molecular oxygen, reduced ascorbate as one donor, and incorporation of one atom of oxygen (GO:0016715);; Biological Process: oxidation-…	K00504|2.48081e-165|tca:664519|K00504 peptidylglycine monooxygenase [EC:1.14.17.3] | (RefSeq) peptidylglycine alpha-hydroxylating monooxygenase	[O]	Posttranslational modification, protein turnover, chaperones	Copper type II ascorbate-dependent monooxygenase, C-terminal domain;; Copper type II ascorbate-dependent monooxygenase, N-terminal domain	Peptidylglycine alpha-hydroxylating monooxygenase OS=Drosophila melanogaster OX=7227 GN=Phm PE=1 SV=2	S	Function unknown	peptidylglycine alpha-hydroxylating monooxygenase [Anoplophora glabripennis]
c50691.graph_c0	259	283	314	1203	3066	2218	8.23	7.15	8.66	28.77	86.78	65.75	2.57304e-11	3.03981	up	--	--	--	--	--	--	Mucin-like	--	--	--	--
c55592.graph_c1	1729	1054	1769	6222	13456	15347	78.88	38.15	65.94	204.84	527.22	592.3	2.1858e-09	3.0288	up	[O]	Posttranslational modification, protein turnover, chaperones	Molecular Function: serine-type endopeptidase activity (GO:0004252);; Biological Process: proteolysis (GO:0006508);; Cellular Component: integral component of membrane (GO:0016021);;	K08653|0|tca:100142346|K08653 membrane-bound transcription factor site-1 protease [EC:3.4.21.112] | (RefSeq) membrane-bound transcription factor site-1 protease	[O]	Posttranslational modification, protein turnover, chaperones	Subtilase family	Tripeptidyl-peptidase 2 OS=Drosophila melanogaster OX=7227 GN=TppII PE=1 SV=2	O	Posttranslational modification, protein turnover, chaperones	membrane-bound transcription factor site-1 protease isoform X1 [Anoplophora glabripennis]
c57262.graph_c0	386	539	517	2236	4409	3831	5.6	6.36	6.53	25.04	58.29	53.11	7.96254e-14	2.99458	up	[Q]	Secondary metabolites biosynthesis, transport and catabolism	Molecular Function: peroxidase activity (GO:0004601);; Biological Process: response to oxidative stress (GO:0006979);; Molecular Function: heme binding (GO:0020037);; Cellular Component: chorion (GO:0042600);; Biological Process: oxidation-reduction process (GO:0055114);; Biological Process: cellular oxidant detoxification (GO:0098869);;	--	[R]	General function prediction only	Animal haem peroxidase	Peroxidase OS=Drosophila melanogaster OX=7227 GN=Pxd PE=2 SV=2	S	Function unknown	peroxidase-like [Anoplophora glabripennis]
c55311.graph_c0	2452	2719	3921	9519	32726	23990	64.74	58.75	92.43	201.63	811.78	597.64	1.23603e-08	2.99283	up	[O]	Posttranslational modification, protein turnover, chaperones	Molecular Function: serine-type peptidase activity (GO:0008236);;	K20753|1.33313e-114|tca:659360|K20753 limulus clotting enzyme [EC:3.4.21.86] | (RefSeq) P55; serine protease P55	[E]	Amino acid transport and metabolism	Trypsin;; Chymotrypsin family Peptidase-S1;; Regulatory CLIP domain of proteinases	Venom serine protease Bi-VSP OS=Bombus ignitus OX=130704 PE=1 SV=1	O	Posttranslational modification, protein turnover, chaperones	venom protease [Anoplophora glabripennis]
c55671.graph_c0	167	230	138	1049	1124	1715	4.43	4.95	3.17	22.19	26.84	43.86	2.5552e-13	2.973	up	[R]	General function prediction only	Cellular Component: membrane (GO:0016020);;	K10532|1.11707e-118|tca:655343|K10532 heparan-alpha-glucosaminide N-acetyltransferase [EC:2.3.1.78] | (RefSeq) heparan-alpha-glucosaminide N-acetyltransferase	[S]	Function unknown	Domain of unknown function (DUF5009)	--	S	Function unknown	heparan-alpha-glucosaminide N-acetyltransferase-like [Anoplophora glabripennis]
c52118.graph_c1	1100	1729	2578	12280	12162	13953	51.98	65.47	105.75	442.12	514.48	620.99	3.8482e-16	2.96718	up	--	--	--	--	--	--	Haemolymph juvenile hormone binding protein (JHBP)	Protein takeout OS=Drosophila melanogaster OX=7227 GN=to PE=2 SV=1	S	Function unknown	protein takeout-like [Anoplophora glabripennis]
c54608.graph_c0	173	344	235	102	2483	2854	5.05	8.27	6.09	1.84	52.04	64.95	0.00118689	2.96342	up	[G]	Carbohydrate transport and metabolism	Molecular Function: transporter activity (GO:0005215);; Cellular Component: integral component of membrane (GO:0016021);; Biological Process: transmembrane transport (GO:0055085);;	K08193|0|tca:100142465|K08193 MFS transporter, ACS family, solute carrier family 17 (sodium-dependent inorganic phosphate cotransporter), other | (RefSeq) sialin	[G]	Carbohydrate transport and metabolism	Major Facilitator Superfamily;; Sugar (and other) transporter	Putative inorganic phosphate cotransporter OS=Drosophila ananassae OX=7217 GN=Picot PE=3 SV=1	G	Carbohydrate transport and metabolism	putative inorganic phosphate cotransporter [Anoplophora glabripennis]
c51408.graph_c0	1437	2540	1989	24128	9423	10319	68.98	98.25	81.35	852.21	426.52	436.12	4.04042e-12	2.95566	up	--	--	--	--	--	--	--	--	--	--	myb-like protein Q isoform X2 [Anoplophora glabripennis]
c51037.graph_c0	274	302	300	979	3557	1747	8.45	7.8	8.16	24.37	104.42	53.84	3.23395e-08	2.95205	up	[Q]	Secondary metabolites biosynthesis, transport and catabolism	Cellular Component: membrane (GO:0016020);;	K13356|0|tca:662610|K13356 alcohol-forming fatty acyl-CoA reductase [EC:1.2.1.84] | (RefSeq) putative fatty acyl-CoA reductase CG5065	[I]	Lipid transport and metabolism	Male sterility protein;; Male sterility protein;; 3-beta hydroxysteroid dehydrogenase/isomerase family;; NAD dependent epimerase/dehydratase family;; GDP-mannose 4,6 dehydratase;; Polysaccharide biosynthesis protein	Fatty acyl-CoA reductase wat OS=Drosophila melanogaster OX=7227 GN=wat PE=1 SV=1	S	Function unknown	fatty acyl-CoA reductase wat-like [Anoplophora glabripennis]
c53661.graph_c0	202	542	382	3967	2275	1760	4.64	10.59	7.89	99.87	64.13	53.04	1.53898e-11	2.93875	up	[L]	Replication, recombination and repair	Molecular Function: DNA binding (GO:0003677);; Molecular Function: DNA ligase (ATP) activity (GO:0003910);; Molecular Function: serine-type endopeptidase activity (GO:0004252);; Molecular Function: ATP binding (GO:0005524);; Biological Process: DNA recombination (GO:0006310);; Biological Process: proteolysis (GO:0006508);; Molecular Function: zinc ion binding (GO:0008270);; Biological Process: DN…	K10776|0|tca:656322|K10776 DNA ligase 3 [EC:6.5.1.1] | (RefSeq) ligase III	[L]	Replication, recombination and repair	ATP dependent DNA ligase domain;; DNA ligase N terminus;; Poly(ADP-ribose) polymerase and DNA-Ligase Zn-finger region;; ATP dependent DNA ligase C terminal region;; DNA ligase 3 BRCT domain	DNA ligase 3 OS=Dictyostelium discoideum OX=44689 GN=lig3 PE=3 SV=1	L	Replication, recombination and repair	DNA ligase 3 [Anoplophora glabripennis]
c55120.graph_c0	1717	1718	8497	26507	24894	32194	67.15	55.7	306.4	840.15	913.28	1164.27	3.42614e-06	2.93135	up	[I]	Lipid transport and metabolism	Molecular Function: hydrolase activity (GO:0016787);;	--	[R]	General function prediction only	Carboxylesterase family;; alpha/beta hydrolase fold;; Prolyl oligopeptidase family	Esterase FE4 OS=Myzus persicae OX=13164 PE=1 SV=1	I	Lipid transport and metabolism	uncharacterized protein LOC108911898 [Anoplophora glabripennis]
c48840.graph_c0	175	358	312	602	1640	3538	13.03	21.56	20.18	34.26	109.42	247.64	5.72392e-06	2.92542	up	--	--	Biological Process: cellular process (GO:0009987);; Biological Process: single-organism process (GO:0044699);;	--	[R]	General function prediction only	Leucine rich repeat;; Leucine rich repeats (6 copies);; Leucine Rich repeats (2 copies)	--	S	Function unknown	leucine-rich repeat-containing protein 15-like [Anoplophora glabripennis]
c45064.graph_c0	372	790	761	1726	5456	5670	26.43	45.31	46.86	93.54	346.73	378.06	1.31192e-07	2.90116	up	--	--	Cellular Component: extracellular region (GO:0005576);; Biological Process: chitin metabolic process (GO:0006030);; Molecular Function: chitin binding (GO:0008061);;	--	--	--	Chitin binding Peritrophin-A domain	Protein obstructor-E OS=Drosophila melanogaster OX=7227 GN=obst-E PE=2 SV=2	S	Function unknown	protein obstructor-E [Anoplophora glabripennis]
c53667.graph_c0	499	496	1603	5072	4832	7609	31.9	25.78	86.42	247.47	278.63	459.75	7.98496e-08	2.8801	up	--	--	Cellular Component: extracellular region (GO:0005576);; Biological Process: metabolic process (GO:0008152);; Cellular Component: membrane (GO:0016020);;	--	--	--	Eukaryotic cytochrome b561	--	S	Function unknown	cytochrome b561 domain-containing protein 2 [Anoplophora glabripennis]
c56640.graph_c0	2952	5210	4275	41663	27159	16441	55.18	76.98	63.32	535.63	435.51	328.37	4.0981e-13	2.86988	up	--	--	--	--	--	--	--	--	O	Posttranslational modification, protein turnover, chaperones	mucin-2-like [Anoplophora glabripennis]
c54136.graph_c0	253	257	435	2494	2744	1157	8.13	6.71	12.16	61.67	79.93	35.35	1.23334e-10	2.84848	up	--	--	Cellular Component: membrane (GO:0016020);;	--	--	--	--	--	S	Function unknown	protein grindelwald [Anoplophora glabripennis]
c47531.graph_c0	103	169	341	537	905	2526	6.2	8.29	18.02	25.2	49.67	145.95	2.6209e-05	2.8463	up	--	--	--	--	--	--	--	--	--	--	uncharacterized protein LOC108905677 [Anoplophora glabripennis]
c59568.graph_c0	967	1037	949	1186	9037	9311	39.66	40.72	34.35	47.52	482.95	521.38	6.36809e-05	2.82927	up	[R]	General function prediction only	--	--	[I]	Lipid transport and metabolism	GDSL-like Lipase/Acylhydrolase;; Ras family;; Ras of Complex, Roc, domain of DAPkinase;; ADP-ribosylation factor family;; 50S ribosome-binding GTPase	Ras-related protein Rab-1A OS=Lymnaea stagnalis OX=6523 GN=RAB1A PE=2 SV=1	I	Lipid transport and metabolism	phospholipase B1, membrane-associated-like [Anoplophora glabripennis]
c59395.graph_c0	1642	2251	2118	9668	13837	15416	20.73	23.11	23.28	95.4	161.67	188.94	6.02886e-16	2.82707	up	[P]	Inorganic ion transport and metabolism	--	K07232|1.89524e-114|tca:658543|K07232 cation transport protein ChaC | (RefSeq) glutathione-specific gamma-glutamylcyclotransferase 1	[P]	Inorganic ion transport and metabolism	ChaC-like protein;; Serpin (serine protease inhibitor)	Serine protease inhibitor 42Dd OS=Drosophila melanogaster OX=7227 GN=Spn42Dd PE=2 SV=1	P	Inorganic ion transport and metabolism	uncharacterized protein LOC108910995 [Anoplophora glabripennis]
c58618.graph_c0	178	487	262	1128	2114	2633	3.37	6.89	3.89	14.84	30.94	46.6	2.1785e-08	2.82516	up	--	--	--	--	--	--	Phage integrase family	--	S	Function unknown	uncharacterized protein LOC108910939 [Anoplophora glabripennis]
c56057.graph_c0	401	137	166	1151	1621	2192	8.51	2.31	3.69	20.09	31.31	46.94	2.25826e-06	2.8203	up	[P]	Inorganic ion transport and metabolism	Molecular Function: secondary active sulfate transmembrane transporter activity (GO:0008271);; Cellular Component: integral component of membrane (GO:0016021);; Biological Process: sulfate transmembrane transport (GO:1902358);;	K14708|0|tca:661007|K14708 solute carrier family 26 (sodium-independent sulfate anion transporter), member 11 | (RefSeq) sodium-independent sulfate anion transporter	[P]	Inorganic ion transport and metabolism	Sulfate permease family;; STAS domain	Sulfate permease family protein 3 OS=Caenorhabditis elegans OX=6239 GN=sulp-3 PE=2 SV=3	P	Inorganic ion transport and metabolism	sodium-independent sulfate anion transporter isoform X2 [Anoplophora glabripennis]
c58583.graph_c1	452	704	681	3056	4820	3909	5.81	7.42	7.14	25.79	46.93	46.7	7.91947e-16	2.81983	up	--	--	--	--	--	--	Fibronectin type III domain;; von Willebrand factor type C domain;; TILa domain	Putative epidermal cell surface receptor OS=Drosophila melanogaster OX=7227 GN=sas PE=2 SV=2	U	Intracellular trafficking, secretion, and vesicular transport	putative epidermal cell surface receptor [Anoplophora glabripennis]
c55585.graph_c1	129	120	203	1955	1078	153	2.48	1.87	3.39	28.95	18.83	2.8	0.00014999	2.81533	up	--	--	Molecular Function: calcium ion binding (GO:0005509);; Cellular Component: integral component of membrane (GO:0016021);;	--	[T]	Signal transduction mechanisms	EGF domain	Cadherin-related tumor suppressor OS=Drosophila melanogaster OX=7227 GN=ft PE=1 SV=3	S	Function unknown	uncharacterized protein LOC108904997 [Anoplophora glabripennis]
c59343.graph_c1	108	154	283	1758	1447	420	2.86	3.31	6.54	35.83	34.77	10.58	9.58948e-07	2.81332	up	[O]	Posttranslational modification, protein turnover, chaperones	--	--	--	--	Serpin (serine protease inhibitor);; Vault protein inter-alpha-trypsin domain	Serine protease inhibitor 42Dd OS=Drosophila melanogaster OX=7227 GN=Spn42Dd PE=2 SV=1	S	Function unknown	inter-alpha-trypsin inhibitor heavy chain H3-like isoform X2 [Anoplophora glabripennis]
c54034.graph_c0	289	362	305	831	2693	2612	9.8	9.9	8.95	21.24	84.29	83.35	1.20334e-07	2.80629	up	--	--	--	--	--	--	--	--	S	Function unknown	uncharacterized protein LOC108903663 [Anoplophora glabripennis]
c51699.graph_c0	4697	12566	5908	76524	33446	40966	135.38	293.25	148.54	1686.3	869.35	1116.36	1.58479e-09	2.80488	up	--	--	--	--	--	--	--	--	--	--	uncharacterized protein LOC108912997 [Anoplophora glabripennis]
c33761.graph_c0	162	403	152	598	2004	1896	20.61	41.32	16.77	57.66	225.13	223.58	4.09561e-06	2.79691	up	--	--	Molecular Function: structural constituent of cuticle (GO:0042302);;	--	--	--	Insect cuticle protein	Endocuticle structural glycoprotein SgAbd-2 OS=Schistocerca gregaria OX=7010 PE=1 SV=1	S	Function unknown	endocuticle structural glycoprotein SgAbd-2-like [Anoplophora glabripennis]
c48233.graph_c0	913	1720	1744	4844	10039	12361	23.7	36.26	39.4	96.86	236.5	305.53	4.1331e-09	2.79556	up	--	--	Cellular Component: extracellular region (GO:0005576);; Biological Process: chitin metabolic process (GO:0006030);; Molecular Function: chitin binding (GO:0008061);;	--	--	--	Chitin binding Peritrophin-A domain	Protein obstructor-E OS=Drosophila melanogaster OX=7227 GN=obst-E PE=2 SV=2	S	Function unknown	protein obstructor-E [Anoplophora glabripennis]
c51785.graph_c1	259	477	589	731	2993	4527	10.51	15.73	20.79	22.8	109.84	174.3	2.35192e-05	2.79381	up	--	--	--	K20694|3.72081e-65|tca:103315111|K20694 protein spaetzle | (RefSeq) spz-like; protein spaetzle	--	--	Spaetzle	Protein spaetzle OS=Drosophila melanogaster OX=7227 GN=spz PE=1 SV=3	S	Function unknown	protein spaetzle isoform X2 [Anoplophora glabripennis]
c50360.graph_c0	281	257	389	1368	1442	3064	18.04	13.36	21.71	67.26	83.2	185.47	4.36089e-09	2.77599	up	--	--	--	--	--	--	Eukaryotic cytochrome b561	--	S	Function unknown	cytochrome b561 domain-containing protein 2-like [Anoplophora glabripennis]
c55585.graph_c0	140	188	191	2102	1142	224	1.87	2	1.91	15.11	10.04	2.42	3.6918e-05	2.76143	up	--	--	Molecular Function: calcium ion binding (GO:0005509);; Cellular Component: membrane (GO:0016020);;	--	[T]	Signal transduction mechanisms	EGF domain	Neurogenic locus Notch protein OS=Drosophila melanogaster OX=7227 GN=N PE=1 SV=3	S	Function unknown	uncharacterized protein LOC108904997 [Anoplophora glabripennis]
c57348.graph_c0	339	428	470	3439	2750	1680	7.13	6.96	8.1	52.54	49.24	31.67	2.41026e-15	2.76142	up	[T]	Signal transduction mechanisms	Molecular Function: ATP binding (GO:0005524);; Cellular Component: integral component of membrane (GO:0016021);; Molecular Function: ATPase activity (GO:0016887);;	K14861|0|tca:100141557|K14861 nucleolar pre-ribosomal-associated protein 1 | (RefSeq) uncharacterized LOC100141557	[Q]	Secondary metabolites biosynthesis, transport and catabolism	ABC-2 type transporter;; ABC transporter;; AAA domain, putative AbiEii toxin, Type IV TA system	ABC transporter G family member 1 OS=Dictyostelium discoideum OX=44689 GN=abcG1 PE=3 SV=1	V	Defense mechanisms	ATP-binding cassette sub-family G member 4-like [Anoplophora glabripennis]
c57925.graph_c0	350	499	596	2871	3564	2494	7.41	8.58	10.99	47.12	69.51	50.24	2.21061e-17	2.75534	up	[M]	Cell wall/membrane/envelope biogenesis	Molecular Function: hydrolase activity (GO:0016787);;	K01296|2.75307e-149|tca:100142054|K01296 carboxypeptidase M [EC:3.4.17.12] | (RefSeq) carboxypeptidase D	[R]	General function prediction only	Zinc carboxypeptidase;; Carboxypeptidase regulatory-like domain	Carboxypeptidase E OS=Caenorhabditis elegans OX=6239 GN=egl-21 PE=1 SV=1	E	Amino acid transport and metabolism	PREDICTED: carboxypeptidase D [Tribolium castaneum]
c52946.graph_c0	151	176	331	1778	1846	551	8.41	7.94	15.28	69.35	87.51	27.08	3.07102e-07	2.75088	up	[R]	General function prediction only	--	--	--	--	von Willebrand factor type A domain;; von Willebrand factor type A domain;; von Willebrand factor type A domain	von Willebrand factor A domain-containing protein DDB_G0292028 OS=Dictyostelium discoideum OX=44689 GN=DDB_G0292028 PE=4 SV=1	S	Function unknown	inter-alpha-trypsin inhibitor heavy chain H3 [Anoplophora glabripennis]
c57174.graph_c0	2824	2464	2770	15069	19582	15477	57.37	41.48	50.18	241.06	365.43	271.99	2.5494e-16	2.73003	up	--	--	--	--	--	--	--	--	--	--	fibroin heavy chain-like isoform X1 [Anoplophora glabripennis]
c43886.graph_c0	204	183	166	430	1077	1880	20.58	14.87	14.5	33.01	96.45	176.61	4.67071e-06	2.71253	up	--	--	Cellular Component: membrane (GO:0016020);;	K02268|5.69164e-24|tca:656279|K02268 cytochrome c oxidase subunit 6c | (RefSeq) cox-b; cytochrome c oxidase subunit 6C	--	--	Cytochrome c oxidase subunit VIc	--	O	Posttranslational modification, protein turnover, chaperones	cytochrome c oxidase subunit 6C-like [Anoplophora glabripennis]
c58461.graph_c0	1168	1194	1396	5801	7934	8326	9.67	8.03	10.07	37.11	60.02	65.95	5.1101e-15	2.6689	up	[G]	Carbohydrate transport and metabolism	Biological Process: carbohydrate transport (GO:0008643);; Cellular Component: integral component of membrane (GO:0016021);; Molecular Function: substrate-specific transmembrane transporter activity (GO:0022891);; Biological Process: transmembrane transport (GO:0055085);;	--	[R]	General function prediction only	Sugar (and other) transporter;; Major Facilitator Superfamily;; Protein of unknown function (DUF1647)	Facilitated trehalose transporter Tret1 OS=Culex quinquefasciatus OX=7176 GN=Tret1 PE=3 SV=1	S	Function unknown	facilitated trehalose transporter Tret1 isoform X1 [Anoplophora glabripennis]
c58654.graph_c0	319	306	411	2024	1443	2649	7.97	5.21	7.88	41.21	35.98	57.71	2.08269e-12	2.6633	up	[E]	Amino acid transport and metabolism	--	K11141|2.7066e-137|tca:103314340|K11141 glutamyl aminopeptidase [EC:3.4.11.7] | (RefSeq) glutamyl aminopeptidase	[EO]	--	Peptidase family M1 domain	Puromycin-sensitive aminopeptidase OS=Caenorhabditis elegans OX=6239 GN=pam-1 PE=1 SV=1	E	Amino acid transport and metabolism	puromycin-sensitive aminopeptidase-like protein isoform X2 [Anoplophora glabripennis]
c56000.graph_c0	456	1346	1141	2696	8115	5686	6.43	15.45	14.01	29.34	104.31	76.69	1.24792e-06	2.65937	up	--	--	--	--	--	--	--	--	S	Function unknown	mucin-5AC-like isoform X1 [Anoplophora glabripennis]
c54758.graph_c0	2269	1937	2423	11978	14901	11961	43.01	29.83	39.99	175.14	257.05	216.38	8.97348e-16	2.64527	up	[R]	General function prediction only	--	--	--	--	Fasciclin domain	--	S	Function unknown	uncharacterized protein LOC108909119 [Anoplophora glabripennis]
c57354.graph_c0	1543	2561	1268	16177	6324	9437	59.9	80.91	42.88	485.54	223.94	349.04	3.27994e-09	2.64449	up	[O]	Posttranslational modification, protein turnover, chaperones	--	--	[V]	Defense mechanisms	Serpin (serine protease inhibitor)	Serine protease inhibitor 3/4 (Fragment) OS=Lonomia obliqua OX=304329 PE=1 SV=1	O	Posttranslational modification, protein turnover, chaperones	leukocyte elastase inhibitor-like isoform X3 [Anoplophora glabripennis]
c49961.graph_c0	950	1845	1370	4527	7244	11625	76.87	120.27	95.55	280.42	525.84	890.02	2.14232e-08	2.64249	up	[Q]	Secondary metabolites biosynthesis, transport and catabolism	--	--	[TV]	--	Lectin C-type domain	Perlucin OS=Haliotis laevigata OX=36097 PE=1 SV=3	S	Function unknown	perlucin-like [Anoplophora glabripennis]
c54744.graph_c0	184	241	473	921	2421	1719	4.56	4.87	10.19	17.59	54.56	40.6	5.74486e-07	2.641	up	[G]	Carbohydrate transport and metabolism	Molecular Function: chitinase activity (GO:0004568);; Biological Process: carbohydrate metabolic process (GO:0005975);; Biological Process: chitin catabolic process (GO:0006032);;	K01183|0|tca:658736|K01183 chitinase [EC:3.2.1.14] | (RefSeq) probable chitinase 2	[G]	Carbohydrate transport and metabolism	Glycosyl hydrolases family 18	Probable chitinase 2 OS=Drosophila melanogaster OX=7227 GN=Cht2 PE=1 SV=1	G	Carbohydrate transport and metabolism	probable chitinase 2 [Anoplophora glabripennis]
c57518.graph_c1	1872	1853	1443	14143	8865	7456	17.52	14.1	11.76	102.2	75.67	66.73	1.10734e-12	2.61606	up	[Q]	Secondary metabolites biosynthesis, transport and catabolism	Molecular Function: peroxidase activity (GO:0004601);; Biological Process: response to oxidative stress (GO:0006979);; Cellular Component: membrane (GO:0016020);; Molecular Function: heme binding (GO:0020037);; Biological Process: oxidation-reduction process (GO:0055114);; Biological Process: cellular oxidant detoxification (GO:0098869);;	--	[R]	General function prediction only	Animal haem peroxidase	Peroxidasin OS=Drosophila melanogaster OX=7227 GN=Pxn PE=1 SV=1	S	Function unknown	uncharacterized protein LOC108903983 [Anoplophora glabripennis]
c52946.graph_c1	108	236	294	1409	1457	711	5	9.33	12.06	50.49	62.03	31.57	7.21683e-09	2.61536	up	--	--	--	--	--	--	--	--	--	--	inter-alpha-trypsin inhibitor heavy chain H3-like isoform X2 [Anoplophora glabripennis]
c49646.graph_c0	369	320	462	3056	1656	1931	12.71	8.85	13.93	80.74	51.22	62.46	6.73052e-13	2.60028	up	--	--	Molecular Function: GTP binding (GO:0005525);;	K16943|1.7571e-151|dwi:Dwil_GK10092|K16943 septin 4 | (RefSeq) GK10092 gene product from transcript GK10092-RB	[DZU]	--	Septin;; Septin;; 50S ribosome-binding GTPase	Septin-1 OS=Drosophila melanogaster OX=7227 GN=Sep1 PE=1 SV=1	DZ	--	septin-2 [Anoplophora glabripennis]
c52564.graph_c1	214	319	223	1151	1183	1865	10.59	11.92	9.41	41.53	50.12	82.46	1.43093e-11	2.5986	up	--	--	Molecular Function: growth factor activity (GO:0008083);; Cellular Component: membrane (GO:0016020);;	--	--	--	PDGF/VEGF domain	--	S	Function unknown	uncharacterized protein LOC108905450 isoform X1 [Anoplophora glabripennis]
c48516.graph_c0	224	302	281	1694	951	1871	16.2	17.65	17.64	93.56	61.58	127.33	3.33719e-12	2.59167	up	--	--	--	--	--	--	Kazal-type serine protease inhibitor domain	--	--	--	uncharacterized protein LOC108911092 [Anoplophora glabripennis]
c56117.graph_c0	1300	921	1799	4580	7088	10808	47.48	24.84	57.99	124.94	225.6	379.92	1.31903e-07	2.59085	up	[M]	Cell wall/membrane/envelope biogenesis	Cellular Component: membrane (GO:0016020);;	K01446|3.59982e-100|tca:660982|K01446 peptidoglycan recognition protein | (RefSeq) PGRP; peptidoglycan-recognition protein LE	--	--	N-acetylmuramoyl-L-alanine amidase	Peptidoglycan-recognition protein LE OS=Drosophila melanogaster OX=7227 GN=PGRP-LE PE=1 SV=1	M	Cell wall/membrane/envelope biogenesis	peptidoglycan-recognition protein LC-like [Anoplophora glabripennis]
c59140.graph_c0	2000	2497	1444	5139	13465	14058	84.99	87.84	53.7	183.04	542.15	576.82	7.3343e-07	2.57282	up	--	--	--	--	--	--	--	--	S	Function unknown	uncharacterized protein LOC108903662 isoform X1 [Anoplophora glabripennis]
c59454.graph_c0	2193	3039	2260	14445	13249	13470	12.28	13.77	10.95	64.07	69.38	74.1	4.80516e-21	2.57056	up	[G]	Carbohydrate transport and metabolism	Molecular Function: calcium ion binding (GO:0005509);; Cellular Component: integral component of membrane (GO:0016021);;	K06233|0|aag:AaeL_AAEL009869|K06233 low density lipoprotein-related protein 2 | (RefSeq) AAEL009869-PA	[T]	Signal transduction mechanisms	Low-density lipoprotein receptor domain class A;; Low-density lipoprotein receptor repeat class B;; Coagulation Factor Xa inhibitory site;; Domain of unknown function (DUF5050);; Calcium-binding EGF domain;; SMP-30/Gluconolaconase/LRE-like region;; Complement Clr-like EGF-like;; Arylesterase	Low-density lipoprotein receptor-related protein OS=Caenorhabditis elegans OX=6239 GN=lrp-1 PE=1 SV=1	S	Function unknown	low-density lipoprotein receptor-related protein 2 [Anoplophora glabripennis]
c36217.graph_c0	121	237	100	955	454	1117	7.76	12.31	5.57	46.89	26.22	67.53	2.94976e-07	2.5682	up	[P]	Inorganic ion transport and metabolism	--	K01672|3.09456e-55|tca:659821|K01672 carbonic anhydrase [EC:4.2.1.1] | (RefSeq) putative carbonic anhydrase 3	[R]	General function prediction only	Eukaryotic-type carbonic anhydrase	Putative carbonic anhydrase 3 OS=Caenorhabditis elegans OX=6239 GN=cah-3 PE=3 SV=1	P	Inorganic ion transport and metabolism	putative carbonic anhydrase 3 isoform X1 [Anoplophora glabripennis]
c57157.graph_c0	441	385	1055	5610	2540	2427	29.1	18.45	51.37	208.26	110.96	110.82	6.97085e-07	2.56077	up	--	--	--	--	--	--	Homeodomain-like domain	--	S	Function unknown	PREDICTED: putative uncharacterized protein FLJ37770 [Vollenhovia emeryi]
c48811.graph_c0	970	1269	1724	5194	8973	6916	66.15	70.06	102.16	271	549.1	444.06	3.68723e-11	2.54903	up	--	--	--	--	--	--	Single domain von Willebrand factor type C	--	S	Function unknown	uncharacterized protein LOC108906571 [Anoplophora glabripennis]
c52492.graph_c0	140	131	154	604	1099	595	8.38	6.39	8.04	27.74	59.14	33.52	1.4216e-09	2.53565	up	[Q]	Secondary metabolites biosynthesis, transport and catabolism	Cellular Component: integral component of membrane (GO:0016021);; Biological Process: oxidation-reduction process (GO:0055114);; Molecular Function: fatty-acyl-CoA reductase (alcohol-forming) activity (GO:0080019);;	K13356|4.33546e-137|tca:656856|K13356 alcohol-forming fatty acyl-CoA reductase [EC:1.2.1.84] | (RefSeq) putative fatty acyl-CoA reductase CG5065	[I]	Lipid transport and metabolism	Male sterility protein;; NAD dependent epimerase/dehydratase family;; 3-beta hydroxysteroid dehydrogenase/isomerase family;; Polysaccharide biosynthesis protein	Putative fatty acyl-CoA reductase CG5065 OS=Drosophila melanogaster OX=7227 GN=CG5065 PE=3 SV=1	S	Function unknown	fatty acyl-CoA reductase 1-like, partial [Anoplophora glabripennis]
c46862.graph_c0	411	937	469	3913	1574	4226	59.44	109.06	58.78	427.64	200.02	563.84	3.52378e-07	2.53297	up	--	--	--	--	--	--	--	Antimicrobial peptide Alo-1 OS=Acrocinus longimanus OX=227548 PE=1 SV=1	--	--	PREDICTED: antimicrobial peptide 1-like isoform X2 [Agrilus planipennis]
c52492.graph_c1	111	119	143	440	721	817	6.03	5.38	6.74	18.4	35.23	41.81	7.93142e-10	2.53013	up	--	--	Cellular Component: integral component of membrane (GO:0016021);; Biological Process: oxidation-reduction process (GO:0055114);; Molecular Function: fatty-acyl-CoA reductase (alcohol-forming) activity (GO:0080019);;	K13356|2.95468e-97|tca:656856|K13356 alcohol-forming fatty acyl-CoA reductase [EC:1.2.1.84] | (RefSeq) putative fatty acyl-CoA reductase CG5065	[I]	Lipid transport and metabolism	Male sterility protein	Putative fatty acyl-CoA reductase CG5065 OS=Drosophila melanogaster OX=7227 GN=CG5065 PE=3 SV=1	S	Function unknown	putative fatty acyl-CoA reductase CG5065 [Leptinotarsa decemlineata]
c55197.graph_c1	175	179	720	291	3495	1838	3.03	2.5	10.6	3.92	54.73	30.32	0.00461407	2.52405	up	--	--	Biological Process: regulation of microtubule polymerization or depolymerization (GO:0031110);;	--	--	--	Stathmin family	--	S	Function unknown	S phase cyclin A-associated protein in the endoplasmic reticulum isoform X1 [Anoplophora glabripennis]
c48857.graph_c0	304	635	573	927	3331	3503	6.39	10.87	10.49	15.03	63.71	70.27	1.45445e-05	2.5228	up	--	--	Cellular Component: extracellular region (GO:0005576);; Biological Process: carbohydrate metabolic process (GO:0005975);; Biological Process: chitin metabolic process (GO:0006030);; Molecular Function: chitin binding (GO:0008061);; Cellular Component: integral component of membrane (GO:0016021);; Molecular Function: hydrolase activity, acting on carbon-nitrogen (but not peptide) bonds (GO:0016810…	--	--	--	Chitin binding Peritrophin-A domain	--	S	Function unknown	uncharacterized protein LOC108906420 [Anoplophora glabripennis]
c57810.graph_c0	5446	7174	6648	27992	37299	35891	148.51	156.7	161.64	599.71	933.55	845.67	3.99063e-16	2.51982	up	--	--	Molecular Function: chitin deacetylase activity (GO:0004099);; Cellular Component: extracellular region (GO:0005576);; Biological Process: carbohydrate metabolic process (GO:0005975);; Biological Process: chitin metabolic process (GO:0006030);; Molecular Function: chitin binding (GO:0008061);;	--	--	--	Low-density lipoprotein receptor domain class A;; Chitin binding Peritrophin-A domain	--	S	Function unknown	uncharacterized protein LOC108904405 isoform X1 [Anoplophora glabripennis]
c48024.graph_c0	376	384	374	1562	2010	2427	16.86	13.96	14.59	53.8	81.43	103.15	2.72696e-12	2.5131	up	--	--	Cellular Component: integral component of membrane (GO:0016021);;	--	--	--	Tight junction protein, Claudin-like	--	S	Function unknown	uncharacterized protein LOC108914566 [Anoplophora glabripennis]
c52624.graph_c0	1573	3024	3093	10417	17325	11665	29.61	46.25	50.68	151.2	296.68	209.5	1.18423e-10	2.50797	up	[R]	General function prediction only	--	--	--	--	Vault protein inter-alpha-trypsin domain;; von Willebrand factor type A domain;; von Willebrand factor type A domain	--	S	Function unknown	inter-alpha-trypsin inhibitor heavy chain H4 isoform X1 [Anoplophora glabripennis]
c52817.graph_c1	313	285	373	1762	1996	1397	6.65	4.83	7.26	26.84	35.83	27.99	3.01845e-14	2.50423	up	[E]	Amino acid transport and metabolism	Biological Process: amino acid transmembrane transport (GO:0003333);; Molecular Function: amino acid transmembrane transporter activity (GO:0015171);; Cellular Component: integral component of membrane (GO:0016021);;	K13865|0|tca:655390|K13865 solute carrier family 7 (cationic amino acid transporter), member 3 | (RefSeq) high affinity cationic amino acid transporter 1	[E]	Amino acid transport and metabolism	Amino acid permease;; Amino acid permease;; C-terminus of AA_permease	--	E	Amino acid transport and metabolism	cationic amino acid transporter 3 [Anoplophora glabripennis]
c52772.graph_c0	219	370	685	2311	1579	2590	8.1	11.04	22.24	68.87	55.33	95.79	5.87891e-08	2.48443	up	--	--	--	--	--	--	Fuseless	--	S	Function unknown	uncharacterized protein LOC108905848 isoform X1 [Anoplophora glabripennis]
c51507.graph_c1	445	812	669	1991	2987	4687	16.39	24.26	21.43	56.41	99.59	163.91	3.84543e-08	2.47893	up	--	--	--	--	--	--	Protein of unknown function (DUF3105)	--	S	Function unknown	uncharacterized protein LOC108904036 [Anoplophora glabripennis]
c57654.graph_c0	16318	20692	20758	51842	66769	173079	4288.85	4317.78	4627.19	10094	14764.9	40874.4	4.9183e-06	2.46656	up	[X]	Mobilome: prophages, transposons	--	--	[R]	General function prediction only	Reverse transcriptase (RNA-dependent DNA polymerase);; Endonuclease-reverse transcriptase	Probable RNA-directed DNA polymerase from transposon BS OS=Drosophila melanogaster OX=7227 GN=RTase PE=2 SV=1	S	Function unknown	uncharacterized protein LOC111351717 [Spodoptera litura]
c47118.graph_c0	267	261	312	1131	1169	1976	49.22	38.6	49.88	156.61	188.09	333.22	7.03516e-10	2.45913	up	--	--	--	--	--	--	--	--	--	--	uncharacterized protein LOC108904774 [Anoplophora glabripennis]
c53741.graph_c0	170	292	386	895	1399	1881	13.64	18.49	24.28	55.61	101.92	141.6	7.58133e-08	2.45635	up	--	--	--	--	--	--	--	--	--	--	uncharacterized protein LOC108905683 isoform X3 [Anoplophora glabripennis]
c49606.graph_c0	1001	237	1107	4444	3673	4437	125.06	23.85	120.09	420.77	405.89	514.35	5.53146e-05	2.44728	up	--	--	--	--	--	--	--	Attacin-C OS=Drosophila melanogaster OX=7227 GN=AttC PE=1 SV=1	--	--	uncharacterized protein LOC108910919 [Anoplophora glabripennis]
c56157.graph_c2	277	553	584	3638	1838	1530	9.12	18.11	17.29	72.71	64.3	53.26	1.51671e-08	2.41046	up	--	--	--	--	[R]	General function prediction only	Reverse transcriptase (RNA-dependent DNA polymerase)	Probable RNA-directed DNA polymerase from transposon X-element OS=Drosophila melanogaster OX=7227 GN=X-element\ORF2 PE=3 SV=1	S	Function unknown	uncharacterized protein LOC111423567 [Onthophagus taurus]
c46835.graph_c1	931	1686	1342	3548	5957	9225	46.58	68.16	58.09	135.23	266.76	434.49	3.59433e-07	2.39498	up	--	--	--	--	--	--	--	--	S	Function unknown	protein obstructor-E isoform X3 [Anoplophora glabripennis]
c58735.graph_c1	271	404	461	1519	2458	1428	2.69	3.25	3.97	11.62	22.2	13.52	4.1971e-10	2.3845	up	[U]	Intracellular trafficking, secretion, and vesicular transport	Molecular Function: calcium ion binding (GO:0005509);; Cellular Component: plasma membrane (GO:0005886);; Biological Process: homophilic cell adhesion via plasma membrane adhesion molecules (GO:0007156);; Cellular Component: integral component of membrane (GO:0016021);;	K16500|0|tca:656828|K16500 protocadherin-15 | (RefSeq) protocadherin-15	[S]	Function unknown	Cadherin domain;; Cadherin-like;; Cadherin-like	Cadherin-99C OS=Drosophila melanogaster OX=7227 GN=Cad99C PE=1 SV=2	U	Intracellular trafficking, secretion, and vesicular transport	cadherin-99C [Anoplophora glabripennis]
c51677.graph_c0	1462	2222	2555	11881	10826	7262	21.22	26.2	31.48	128.78	139.76	103.93	2.34376e-13	2.38255	up	[E]	Amino acid transport and metabolism	Molecular Function: peptidase activity, acting on L-amino acid peptides (GO:0070011);;	K11140|0|tca:655036|K11140 aminopeptidase N [EC:3.4.11.2] | (RefSeq) aminopeptidase N	[EO]	--	Peptidase family M1 domain;; ERAP1-like C-terminal domain	Aminopeptidase N OS=Manduca sexta OX=7130 GN=APN2 PE=1 SV=2	E	Amino acid transport and metabolism	aminopeptidase N [Anoplophora glabripennis]
c59397.graph_c0	815	1294	1622	6327	6888	4236	19.71	24.95	30.44	94.19	120.97	116.49	3.65633e-11	2.35371	up	--	--	--	--	--	--	Chitin binding Peritrophin-A domain	--	S	Function unknown	mucin-5AC-like [Anoplophora glabripennis]
c57825.graph_c0	166	392	410	1762	2299	472	1.99	3.83	4.28	16.29	25.12	5.4	0.00011899	2.34312	up	--	--	--	--	--	--	--	--	Z	Cytoskeleton	titin isoform X3 [Anoplophora glabripennis]
c58180.graph_c0	271	454	370	1313	2101	1619	2.85	3.89	3.4	10.69	20.19	16.32	9.58866e-11	2.34037	up	[K]	Transcription	Molecular Function: catalytic activity (GO:0003824);;	K16340|0|tca:662191|K16340 PH domain and leucine-rich repeat-containing protein phosphatase [EC:3.1.3.16] | (RefSeq) protein phosphatase PHLPP-like protein	[T]	Signal transduction mechanisms	Leucine rich repeat;; Leucine Rich repeats (2 copies);; Protein phosphatase 2C	Protein phosphatase PHLPP-like protein OS=Drosophila melanogaster OX=7227 GN=Phlpp PE=4 SV=1	S	Function unknown	protein phosphatase PHLPP-like protein [Anoplophora glabripennis]
c54799.graph_c0	3881	5484	6008	22989	28894	19253	103.43	118.69	139.36	471.94	699.15	488.61	1.28834e-13	2.33731	up	--	--	--	--	--	--	--	--	--	--	uncharacterized protein LOC108909505 [Anoplophora glabripennis]
c57414.graph_c0	533	568	666	3852	2465	2093	10.27	8.97	11.77	57.85	42.84	38.33	1.35197e-12	2.33316	up	[M]	Cell wall/membrane/envelope biogenesis	Molecular Function: metallocarboxypeptidase activity (GO:0004181);; Biological Process: proteolysis (GO:0006508);; Molecular Function: zinc ion binding (GO:0008270);;	--	[R]	General function prediction only	Zinc carboxypeptidase;; Carboxypeptidase regulatory-like domain	Carboxypeptidase D OS=Drosophila melanogaster OX=7227 GN=svr PE=1 SV=2	E	Amino acid transport and metabolism	carboxypeptidase [Monochamus alternatus]
c51870.graph_c1	170	213	147	1419	778	389	8.1	8.22	6.07	52.05	33.37	17.5	2.79019e-06	2.33245	up	--	--	--	K06515|2.87655e-31|tca:658554|K06515 solute carrier family 44 (choline transporter-like protein), member 1 | (RefSeq) choline transporter-like protein 1	--	--	Plasma-membrane choline transporter	--	S	Function unknown	uncharacterized protein LOC108908198 [Anoplophora glabripennis]
c55009.graph_c0	618	175	324	1496	2121	1937	18.39	4.15	8.46	34.96	58.19	55.01	8.51737e-05	2.32038	up	[E]	Amino acid transport and metabolism	Molecular Function: hydrolase activity (GO:0016787);;	K01372|3.71525e-149|tca:660395|K01372 bleomycin hydrolase [EC:3.4.22.40] | (RefSeq) bleomycin hydrolase	[E]	Amino acid transport and metabolism	Peptidase C1-like family	--	E	Amino acid transport and metabolism	bleomycin hydrolase-like [Anoplophora glabripennis]
c56632.graph_c0	439	764	574	2575	2528	2793	8.2	11.57	9.41	37.24	42.92	50.83	3.10343e-14	2.28552	up	--	--	Cellular Component: integral component of membrane (GO:0016021);;	--	[T]	Signal transduction mechanisms	CD36 family	Protein peste OS=Drosophila melanogaster OX=7227 GN=pes PE=2 SV=1	U	Intracellular trafficking, secretion, and vesicular transport	scavenger receptor class B member 1 [Anoplophora glabripennis]
c53537.graph_c0	101	135	157	752	542	456	1.19	1.3	1.62	6.87	5.85	5.16	4.9439e-12	2.25889	up	[K]	Transcription	Molecular Function: phosphoprotein phosphatase activity (GO:0004721);; Biological Process: protein dephosphorylation (GO:0006470);; Biological Process: signal transduction (GO:0007165);; Cellular Component: integral component of membrane (GO:0016021);;	--	[T]	Signal transduction mechanisms	Leucine rich repeat;; Leucine Rich repeats (2 copies);; Leucine rich repeats (6 copies);; TIR domain;; Leucine-rich repeat;; TIR domain;; Leucine Rich Repeat	Toll-like receptor Tollo OS=Drosophila melanogaster OX=7227 GN=Tollo PE=1 SV=1	S	Function unknown	toll-like receptor Tollo [Anoplophora glabripennis]
c58460.graph_c1	1020	1171	1895	2353	8799	6446	24.72	23.03	39.96	43.92	193.65	148.77	7.75476e-05	2.24908	up	--	--	Cellular Component: extracellular region (GO:0005576);; Biological Process: chitin metabolic process (GO:0006030);; Molecular Function: chitin binding (GO:0008061);;	--	--	--	Chitin binding Peritrophin-A domain	Protein obstructor-E OS=Drosophila melanogaster OX=7227 GN=obst-E PE=2 SV=2	S	Function unknown	protein obstructor-E-like [Anoplophora glabripennis]
c50831.graph_c0	312	968	660	2207	3140	2843	9.34	23.93	17.58	51.81	87.75	82.88	3.32707e-07	2.24579	up	[G]	Carbohydrate transport and metabolism	Molecular Function: calcium ion binding (GO:0005509);; Molecular Function: enzyme regulator activity (GO:0030234);; Biological Process: regulation of catalytic activity (GO:0050790);;	--	[PT]	--	SMP-30/Gluconolaconase/LRE-like region	--	G	Carbohydrate transport and metabolism	regucalcin isoform X1 [Anoplophora glabripennis]
c53434.graph_c0	2856	4574	5205	10753	20687	22156	87.51	111.79	133.45	256.25	564.21	631.04	2.50868e-07	2.23933	up	[O]	Posttranslational modification, protein turnover, chaperones	Molecular Function: hydrolase activity (GO:0016787);;	--	[E]	Amino acid transport and metabolism	Trypsin;; Regulatory CLIP domain of proteinases	Phenoloxidase-activating factor 3 OS=Holotrichia diomphalia OX=33394 GN=PPAF3 PE=1 SV=1	O	Posttranslational modification, protein turnover, chaperones	serine protease easter [Anoplophora glabripennis]
c48689.graph_c0	458	235	587	1495	2099	2072	11.43	4.76	12.75	28.76	47.58	49.26	2.89431e-06	2.23244	up	--	--	--	--	--	--	Immunoglobulin domain;; Immunoglobulin domain;; Immunoglobulin I-set domain;; TIR domain;; Immunoglobulin domain;; Izumo-like Immunoglobulin domain	--	S	Function unknown	X-linked interleukin-1 receptor accessory protein-like 2 [Anoplophora glabripennis]
c53898.graph_c0	2516	2931	3452	12528	13980	11502	67.82	63.16	79.71	254.62	337.68	299.06	2.33203e-15	2.2123	up	[O]	Posttranslational modification, protein turnover, chaperones	--	K20674|2.59672e-145|tca:659559|K20674 modular serine protease [EC:3.4.21.-] | (RefSeq) suppressor of tumorigenicity 14 protein	[E]	Amino acid transport and metabolism	Trypsin;; Low-density lipoprotein receptor domain class A;; Sushi repeat (SCR repeat)	Modular serine protease OS=Drosophila melanogaster OX=7227 GN=modSP PE=1 SV=2	O	Posttranslational modification, protein turnover, chaperones	modular serine protease [Anoplophora glabripennis]
c56624.graph_c1	191	107	214	551	1200	485	6.86	3.12	6.92	15.24	39.32	16.53	5.6165e-05	2.20297	up	--	--	Cellular Component: membrane (GO:0016020);; Biological Process: localization (GO:0051179);;	K10949|9.07782e-44|lcm:102350923|K10949 ER lumen protein retaining receptor | (RefSeq) KDELR1; KDEL endoplasmic reticulum protein retention receptor 1	[U]	Intracellular trafficking, secretion, and vesicular transport	ER lumen protein retaining receptor	ER lumen protein-retaining receptor OS=Caenorhabditis elegans OX=6239 GN=erd-2 PE=3 SV=2	U	Intracellular trafficking, secretion, and vesicular transport	ER lumen protein-retaining receptor-like [Anoplophora glabripennis]
c57589.graph_c0	100	139	238	1034	1418	549	1.66	1.85	3.47	13.45	21.34	9.32	1.06085e-08	2.76838	up	--	--	--	--	[T]	Signal transduction mechanisms	WH1 domain;; VASP tetramerisation domain;; RanBP1 domain	Protein enabled OS=Drosophila melanogaster OX=7227 GN=ena PE=1 SV=4	U	Intracellular trafficking, secretion, and vesicular transport	protein enabled isoform X1 [Anoplophora glabripennis]
c57493.graph_c0	325	133	416	624	1856	1268	7.35	2.58	9.13	10.84	36.35	28.94	0.000505664	2.18463	up	[M]	Cell wall/membrane/envelope biogenesis	Molecular Function: zinc ion binding (GO:0008270);; Molecular Function: N-acetylmuramoyl-L-alanine amidase activity (GO:0008745);; Biological Process: peptidoglycan catabolic process (GO:0009253);; Biological Process: innate immune response (GO:0045087);;	K01446|9.53122e-78|tca:658396|K01446 peptidoglycan recognition protein | (RefSeq) PGRP; peptidoglycan-recognition protein 2	--	--	Reverse transcriptase (RNA-dependent DNA polymerase);; N-acetylmuramoyl-L-alanine amidase	Peptidoglycan-recognition protein 2 OS=Holotrichia diomphalia OX=33394 GN=PGRP-2 PE=1 SV=1	S	Function unknown	peptidoglycan-recognition protein 2 [Anoplophora glabripennis]
c46814.graph_c0	528	585	471	1662	2478	2512	48.16	43.12	37.3	115.55	201.53	214.39	3.91327e-09	2.18266	up	--	--	--	--	--	--	--	--	--	--	ATP-dependent RNA helicase DHH1-like [Anoplophora glabripennis]
c56206.graph_c0	1297	355	1396	3121	5496	4704	29.05	6.46	27.22	53.9	111.91	100.47	0.000425902	2.18117	up	[DPM]	Cell cycle control, cell division, chromosome partitioning ;; Inorganic ion transport and metabolism ;; Cell wall/membrane/envelope biogenesis	Molecular Function: copper ion binding (GO:0005507);; Molecular Function: oxidoreductase activity (GO:0016491);; Biological Process: oxidation-reduction process (GO:0055114);;	--	[Q]	Secondary metabolites biosynthesis, transport and catabolism	Multicopper oxidase;; Multicopper oxidase;; Multicopper oxidase	--	Q	Secondary metabolites biosynthesis, transport and catabolism	laccase I [Monochamus alternatus]
c58311.graph_c1	680	708	803	2767	3435	2984	18.86	17.47	21.3	52.26	72.56	73.07	6.9654e-13	2.18024	up	[T]	Signal transduction mechanisms	Molecular Function: protein tyrosine phosphatase activity (GO:0004725);; Biological Process: peptidyl-tyrosine dephosphorylation (GO:0035335);;	--	[T]	Signal transduction mechanisms	Protein-tyrosine phosphatase;; Fibronectin type III domain;; Farnesoic acid 0-methyl transferase	Tyrosine-protein phosphatase Lar OS=Drosophila melanogaster OX=7227 GN=Lar PE=1 SV=2	T	Signal transduction mechanisms	receptor-type tyrosine-protein phosphatase mu-like [Anoplophora glabripennis]
c58312.graph_c0	920	1352	1057	3946	5578	4246	12.63	14.67	12.42	40.85	68.28	55.23	2.96916e-11	2.1763	up	[Q]	Secondary metabolites biosynthesis, transport and catabolism	--	--	[W]	Extracellular structures	Integrin alpha;; FG-GAP repeat;; Repeat domain in Vibrio, Colwellia, Bradyrhizobium and Shewanella	Integrin alpha-PS3 OS=Drosophila melanogaster OX=7227 GN=scb PE=1 SV=2	S	Function unknown	integrin alpha-PS5-like [Anoplophora glabripennis]
c54482.graph_c0	646	654	947	3805	3237	2445	17.01	14	21.7	77.2	77.4	61.33	1.87977e-11	2.17595	up	--	--	--	K08069|1.39174e-22|tca:103313746|K08069 pantetheine hydrolase [EC:3.5.1.92] | (RefSeq) vanin-like protein 1	[E]	Amino acid transport and metabolism	Carbon-nitrogen hydrolase	Vanin-like protein 3 OS=Drosophila melanogaster OX=7227 GN=CG32750 PE=3 SV=1	S	Function unknown	vanin-like protein 3 [Anoplophora glabripennis]
c52039.graph_c0	149	323	292	589	992	1472	6.9	12.16	11.79	20.97	41.49	64.57	1.11889e-05	2.16462	up	--	--	--	--	--	--	Uncharacterized conserved protein (DUF2367)	--	--	--	brain protein I3-like isoform X1 [Anoplophora glabripennis]
c51543.graph_c0	402	629	458	1562	2300	2213	11.1	14.09	10.98	33.28	57.65	58.1	1.3891e-09	2.16404	up	[E]	Amino acid transport and metabolism	Molecular Function: obsolete gamma-glutamyltransferase activity (GO:0003840);; Biological Process: glutathione metabolic process (GO:0006749);; Cellular Component: integral component of membrane (GO:0016021);;	K00681|0|tca:656159|K00681 gamma-glutamyltranspeptidase / glutathione hydrolase [EC:2.3.2.2 3.4.19.13] | (RefSeq) gamma-glutamyltransferase 7	[E]	Amino acid transport and metabolism	Gamma-glutamyltranspeptidase	--	E	Amino acid transport and metabolism	glutathione hydrolase 7-like [Anoplophora glabripennis]
c55530.graph_c0	147	197	256	1113	744	638	2.56	2.81	3.88	14.98	11.81	10.62	4.13135e-10	2.16005	up	[V]	Defense mechanisms	Molecular Function: nucleotide binding (GO:0000166);; Cellular Component: membrane (GO:0016020);;	--	[Q]	Secondary metabolites biosynthesis, transport and catabolism	ABC-2 type transporter;; ABC transporter;; AAA domain, putative AbiEii toxin, Type IV TA system	ABC transporter ATP-binding protein/permease wht-1 OS=Caenorhabditis elegans OX=6239 GN=wht-1 PE=2 SV=2	V	Defense mechanisms	ATP-binding cassette sub-family G member 1 [Anoplophora glabripennis]
c57084.graph_c0	253	383	330	692	1612	1598	3.04	3.74	3.46	6.42	17.7	18.33	3.61666e-06	2.15915	up	--	--	Cellular Component: extracellular region (GO:0005576);; Biological Process: chitin metabolic process (GO:0006030);; Molecular Function: chitin binding (GO:0008061);;	--	--	--	Chitin binding Peritrophin-A domain	--	S	Function unknown	uncharacterized protein LOC111511895 isoform X2 [Leptinotarsa decemlineata]
c52344.graph_c1	173	156	305	816	972	814	19.16	13.94	29.31	68.69	95.5	83.9	3.14682e-08	2.15186	up	--	--	--	--	[E]	Amino acid transport and metabolism	Trypsin	Serine protease snake OS=Drosophila melanogaster OX=7227 GN=snk PE=1 SV=2	O	Posttranslational modification, protein turnover, chaperones	serine protease persephone-like [Anoplophora glabripennis]
c53688.graph_c0	1292	535	1571	2168	7891	4134	44.06	14.82	46.52	57.08	244.6	135.91	0.00108999	2.14306	up	[O]	Posttranslational modification, protein turnover, chaperones	--	--	[E]	Amino acid transport and metabolism	Sushi repeat (SCR repeat)	Limulus clotting factor C OS=Tachypleus tridentatus OX=6853 PE=1 SV=1	O	Posttranslational modification, protein turnover, chaperones	uncharacterized protein LOC108917697 isoform X1 [Anoplophora glabripennis]
c55498.graph_c0	204	229	316	1068	926	1033	8.14	8.35	13.16	33.75	34.46	41.6	2.78754e-12	2.13077	up	--	--	Cellular Component: nucleus (GO:0005634);; Cellular Component: ribosome (GO:0005840);; Biological Process: response to stress (GO:0006950);; Biological Process: regulation of cell cycle (GO:0051726);;	K04402|7.3872e-37|tca:664422|K04402 growth arrest and DNA-damage-inducible protein | (RefSeq) uncharacterized LOC664422	--	--	--	--	S	Function unknown	growth arrest and DNA damage-inducible protein GADD45 alpha [Anoplophora glabripennis]
c56825.graph_c0	869	1116	1071	3571	4704	3873	10.69	11.17	11.49	33.93	52.77	45.57	2.14429e-12	2.11539	up	--	--	--	--	--	--	--	Protein javelin OS=Drosophila melanogaster OX=7227 GN=jv PE=4 SV=1	S	Function unknown	protein javelin [Anoplophora glabripennis]
c59148.graph_c0	173	255	372	712	1441	954	2.25	2.8	4.22	6.94	16.63	11.89	2.9673e-06	2.10548	up	[G]	Carbohydrate transport and metabolism	Cellular Component: Golgi membrane (GO:0000139);; Biological Process: protein glycosylation (GO:0006486);; Cellular Component: integral component of membrane (GO:0016021);; Molecular Function: transferase activity, transferring glycosyl groups (GO:0016757);; Molecular Function: carbohydrate binding (GO:0030246);;	K00710|0|tca:658959|K00710 polypeptide N-acetylgalactosaminyltransferase [EC:2.4.1.41] | (RefSeq) putative polypeptide N-acetylgalactosaminyltransferase 9	[O]	Posttranslational modification, protein turnover, chaperones	Glycosyl transferase family 2;; Ricin-type beta-trefoil lectin domain;; N-terminal domain of galactosyltransferase	Putative polypeptide N-acetylgalactosaminyltransferase 9 OS=Drosophila melanogaster OX=7227 GN=pgant9 PE=2 SV=2	S	Function unknown	PREDICTED: putative polypeptide N-acetylgalactosaminyltransferase 9 isoform X1 [Tribolium castaneum]
c53385.graph_c0	217	293	226	902	995	996	9.87	9.63	6.17	27.76	36.65	43.56	5.95788e-12	2.09404	up	--	--	--	--	--	--	--	--	--	--	uncharacterized protein LOC108916321 isoform X2 [Anoplophora glabripennis]
c59475.graph_c0	169	140	264	549	921	778	2.51	1.85	3.53	7.15	17.82	17.1	1.58464e-06	2.08988	up	--	--	Cellular Component: membrane (GO:0016020);;	--	--	--	--	--	S	Function unknown	uncharacterized protein LOC108904516 [Anoplophora glabripennis]
c51170.graph_c0	163	365	219	483	783	1573	6.67	12.06	7.95	14.06	29.29	58.59	0.000240408	2.08714	up	--	--	Molecular Function: hydrolase activity (GO:0016787);;	K13915|1.01475e-34|tca:658610|K13915 lysozyme C [EC:3.2.1.17] | (RefSeq) Lyz, TC010350, TC010351, TC010352; lysozyme	--	--	C-type lysozyme/alpha-lactalbumin family;; Transglycosylase SLT domain	Lysozyme c-1 OS=Anopheles gambiae OX=7165 GN=AGAP007347 PE=2 SV=2	G	Carbohydrate transport and metabolism	lysozyme c-1-like [Anoplophora glabripennis]
c52588.graph_c0	16519	25835	16043	84913	72372	71834	656.52	833.01	554.7	2594.34	2602.21	2709.25	1.08572e-11	2.08538	up	[O]	Posttranslational modification, protein turnover, chaperones	Molecular Function: catalytic activity (GO:0003824);;	--	[E]	Amino acid transport and metabolism	Trypsin	Phenoloxidase-activating factor 2 OS=Holotrichia diomphalia OX=33394 GN=PPAF2 PE=1 SV=1	O	Posttranslational modification, protein turnover, chaperones	uncharacterized protein LOC108903548 [Anoplophora glabripennis]
c57558.graph_c0	297	461	431	1871	1662	1117	4.83	5.85	6.09	22.25	22.32	15.78	6.87466e-11	2.08182	up	[T]	Signal transduction mechanisms	Molecular Function: protein kinase activity (GO:0004672);; Biological Process: phosphorylation (GO:0016310);;	K05096|0|tca:662470|K05096 FMS-like tyrosine kinase 1 [EC:2.7.10.1] | (RefSeq) vascular endothelial growth factor receptor 1	[T]	Signal transduction mechanisms	Protein tyrosine kinase;; Immunoglobulin I-set domain;; Protein kinase domain;; Immunoglobulin domain;; Immunoglobulin domain;; Immunoglobulin domain;; Immunoglobulin V-set domain	Tyrosine-protein kinase receptor torso OS=Drosophila melanogaster OX=7227 GN=tor PE=1 SV=2	T	Signal transduction mechanisms	vascular endothelial growth factor receptor 1 isoform X2 [Anoplophora glabripennis]
c49155.graph_c0	379	314	355	676	1497	1940	9.94	6.72	8.04	13.86	36.36	48.82	5.82343e-05	2.08051	up	[C]	Energy production and conversion	Molecular Function: L-lactate dehydrogenase activity (GO:0004459);; Cellular Component: cytoplasm (GO:0005737);; Biological Process: carbohydrate metabolic process (GO:0005975);; Biological Process: carboxylic acid metabolic process (GO:0019752);; Biological Process: oxidation-reduction process (GO:0055114);;	K00016|1.11869e-155|hst:105190700|K00016 L-lactate dehydrogenase [EC:1.1.1.27] | (RefSeq) L-lactate dehydrogenase-like	[C]	Energy production and conversion	lactate/malate dehydrogenase, NAD binding domain;; lactate/malate dehydrogenase, alpha/beta C-terminal domain	L-lactate dehydrogenase OS=Drosophila melanogaster OX=7227 GN=ImpL3 PE=2 SV=1	C	Energy production and conversion	L-lactate dehydrogenase isoform X1 [Anoplophora glabripennis]
c59243.graph_c0	626	985	850	2614	3496	3341	12.93	15.7	13.52	31.16	41.74	55.4	1.14543e-10	2.08025	up	--	--	Cellular Component: integral component of membrane (GO:0016021);;	--	--	--	--	--	S	Function unknown	uncharacterized protein LOC111518026 [Leptinotarsa decemlineata]
c59421.graph_c0	196	258	331	1695	1037	425	2.81	3.01	4.59	19.63	14.34	6.27	5.45376e-05	2.07899	up	--	--	Molecular Function: guanyl-nucleotide exchange factor activity (GO:0005085);; Cellular Component: intracellular (GO:0005622);; Biological Process: small GTPase mediated signal transduction (GO:0007264);; Biological Process: positive regulation of GTPase activity (GO:0043547);;	K05727|0|tca:657438|K05727 dedicator of cytokinesis protein 3 | (RefSeq) dedicator of cytokinesis protein 3	[T]	Signal transduction mechanisms	Dock homology region 2	--	S	Function unknown	dedicator of cytokinesis protein 3 [Anoplophora glabripennis]
c42845.graph_c0	2037	8456	2768	7916	11916	29531	143.51	482.22	169.51	426.56	752.97	1957.89	0.00337925	2.07714	up	--	--	Cellular Component: membrane (GO:0016020);;	--	--	--	Thaumatin family	--	S	Function unknown	pathogenesis-related protein 5-like [Anoplophora glabripennis]
c55868.graph_c0	2646	3496	3565	12854	13810	10864	104.66	110.95	122.48	389.43	489.41	403.93	1.25368e-14	2.07147	up	--	--	--	--	[R]	General function prediction only	Fibrinogen beta and gamma chains, C-terminal globular domain	Techylectin-5B OS=Tachypleus tridentatus OX=6853 PE=1 SV=1	S	Function unknown	microfibril-associated glycoprotein 4 [Anoplophora glabripennis]
c58098.graph_c0	334	442	430	2170	1810	790	3.81	4.24	5.28	20.21	19.6	10.23	1.2723e-06	2.06962	up	--	--	Molecular Function: metalloendopeptidase activity (GO:0004222);; Biological Process: proteolysis (GO:0006508);; Biological Process: integrin-mediated signaling pathway (GO:0007229);; Molecular Function: zinc ion binding (GO:0008270);;	K06704|0|tca:661872|K06704 disintegrin and metalloproteinase domain-containing protein 10 [EC:3.4.24.81] | (RefSeq) disintegrin and metalloproteinase domain-containing protein 10	[W]	Extracellular structures	Metallo-peptidase family M12;; Metallo-peptidase family M12B Reprolysin-like;; Metallo-peptidase family M12B Reprolysin-like;; Disintegrin;; Reprolysin family propeptide;; Metallo-peptidase family M12B Reprolysin-like;; Reprolysin (M12B) family zinc metalloprotease	Disintegrin and metalloproteinase domain-containing protein 10 homolog OS=Caenorhabditis elegans OX=6239 GN=sup-17 PE=1 SV=1	O	Posttranslational modification, protein turnover, chaperones	disintegrin and metalloproteinase domain-containing protein 10 [Anoplophora glabripennis]
c25307.graph_c0	102	178	116	133	474	883	19.72	27.59	19.4	19.28	79.5	155.58	0.00370965	2.06027	up	--	--	Molecular Function: structural constituent of cuticle (GO:0042302);;	--	--	--	Insect cuticle protein	Endocuticle structural protein SgAbd-6 OS=Schistocerca gregaria OX=7010 PE=1 SV=1	S	Function unknown	endocuticle structural protein SgAbd-6-like isoform X1 [Anoplophora glabripennis]
c53701.graph_c0	264	287	270	791	1103	1239	12.68	11	12.39	29.16	48.68	56.52	2.07912e-08	2.04923	up	--	--	--	--	[R]	General function prediction only	Phosphatidylethanolamine-binding protein	OV-16 antigen OS=Onchocerca volvulus OX=6282 GN=OV16 PE=2 SV=2	S	Function unknown	protein D3 isoform X1 [Anoplophora glabripennis]
c58283.graph_c0	180	317	303	1422	997	642	1.58	2.32	2.4	9.71	8.19	5.42	1.05778e-07	2.04309	up	--	--	Cellular Component: integral component of membrane (GO:0016021);;	--	--	--	--	--	S	Function unknown	uncharacterized protein LOC108911668 [Anoplophora glabripennis]
c45416.graph_c1	199	619	678	888	1159	3379	7.36	18.14	20.75	25.17	37.3	113.73	0.0025646	2.0424	up	[D]	Cell cycle control, cell division, chromosome partitioning	--	--	[R]	General function prediction only	Ankyrin repeats (3 copies);; Ankyrin repeats (many copies);; Ankyrin repeats (many copies);; Ankyrin repeat;; Ankyrin repeat	Ankyrin repeat and KH domain-containing protein mask-1 OS=Caenorhabditis elegans OX=6239 GN=mask-1 PE=3 SV=3	S	Function unknown	uncharacterized protein LOC108913204 [Anoplophora glabripennis]
c49998.graph_c0	2323	3059	5214	6157	22039	11143	242.8	257.96	472.93	489.44	2045.65	1085.89	0.000437393	2.04221	up	--	--	--	--	--	--	Destabilase	--	S	Function unknown	uncharacterized protein LOC108915662 [Anoplophora glabripennis]
c56151.graph_c0	691	808	765	3277	2839	2537	29.9	28.13	27.41	101.67	106.36	87.95	6.45704e-15	2.03744	up	--	--	Cellular Component: integral component of membrane (GO:0016021);; Biological Process: oxidation-reduction process (GO:0055114);;	--	[T]	Signal transduction mechanisms	DOMON domain;; Eukaryotic cytochrome b561;; Reeler domain	Putative ferric-chelate reductase 1 homolog OS=Drosophila melanogaster OX=7227 GN=CG8399 PE=2 SV=1	S	Function unknown	putative ferric-chelate reductase 1 homolog [Anoplophora glabripennis]
c51870.graph_c0	173	147	172	885	542	498	12.35	8.52	10.68	47.28	34.98	32.9	2.98707e-08	2.03329	up	--	--	--	K15377|4.37354e-15|pxy:105393032|K15377 solute carrier family 44 (choline transporter-like protein), member 2/4/5 | (RefSeq) CTL-like protein 2	[I]	Lipid transport and metabolism	Plasma-membrane choline transporter	Choline transporter-like protein 1 OS=Caenorhabditis elegans OX=6239 GN=chtl-1 PE=3 SV=1	S	Function unknown	uncharacterized protein LOC108908198 [Anoplophora glabripennis]
c51874.graph_c0	219	284	233	1052	881	845	5.87	6.18	5.46	21.73	21.46	21.58	3.42584e-13	2.02285	up	--	--	Cellular Component: intracellular (GO:0005622);; Biological Process: regulation of transcription, DNA-templated (GO:0006355);;	--	--	--	MH2 domain;; Interferon-regulatory factor 3	--	S	Function unknown	uncharacterized protein LOC108917023 [Anoplophora glabripennis]
c56537.graph_c0	101	107	106	387	461	337	1.65	1.39	1.51	4.91	6.75	5.19	1.72363e-09	2.01994	up	--	--	--	--	[R]	General function prediction only	Ankyrin repeats (3 copies);; Ankyrin repeat;; Ankyrin repeat;; Ankyrin repeats (many copies);; Ankyrin repeats (many copies)	Transient receptor potential cation channel protein painless OS=Drosophila melanogaster OX=7227 GN=pain PE=1 SV=1	S	Function unknown	transient receptor potential cation channel subfamily A member 1-like [Anoplophora glabripennis]
c58026.graph_c0	120	121	187	574	547	484	2.42	1.99	3.36	8.99	10.18	9.55	1.47325e-09	2.01652	up	--	--	Cellular Component: membrane (GO:0016020);;	K04136|0|tca:103313384|K04136 adrenergic receptor alpha-1B | (RefSeq) alpha-1D adrenergic receptor	--	--	7 transmembrane receptor (rhodopsin family)	--	S	Function unknown	5-hydroxytryptamine receptor 5B [Anoplophora glabripennis]
c59291.graph_c0	1193	1115	1884	4520	6011	4920	24.39	24.88	33.02	105.92	272.83	158.25	4.32548e-08	1.99997	up	[M]	Cell wall/membrane/envelope biogenesis	--	K01446|1.11112e-41|tca:103312794|K01446 peptidoglycan recognition protein | (RefSeq) PGRP; peptidoglycan-recognition protein SC2	--	--	N-acetylmuramoyl-L-alanine amidase	Peptidoglycan-recognition protein SC1a/b OS=Drosophila simulans OX=7240 GN=PGRP-SC1a PE=3 SV=1	M	Cell wall/membrane/envelope biogenesis	peptidoglycan-recognition protein SA-like isoform X2 [Anoplophora glabripennis]
c50564.graph_c0	911	1599	1594	1926	6204	6349	26.69	36.77	38.36	39.92	140.01	189.49	0.000392223	1.98188	up	[T]	Signal transduction mechanisms	Biological Process: regulation of transcription, DNA-templated (GO:0006355);; Molecular Function: hydrolase activity (GO:0016787);; Molecular Function: sequence-specific DNA binding (GO:0043565);;	K12350|0|tca:664240|K12350 sphingomyelin phosphodiesterase [EC:3.1.4.12] | (RefSeq) sphingomyelin phosphodiesterase	[I]	Lipid transport and metabolism	Calcineurin-like phosphoesterase;; PHD-finger	Sphingomyelin phosphodiesterase 2 OS=Caenorhabditis elegans OX=6239 GN=asm-2 PE=1 SV=3	S	Function unknown	sphingomyelin phosphodiesterase-like [Anoplophora glabripennis]
c54591.graph_c0	837	800	1565	2870	3941	4727	21.68	16.96	35.09	57.45	93.1	117.12	4.84235e-06	1.98094	up	[G]	Carbohydrate transport and metabolism	Molecular Function: beta-N-acetylhexosaminidase activity (GO:0004563);; Biological Process: carbohydrate metabolic process (GO:0005975);;	K12373|0|tca:659187|K12373 hexosaminidase [EC:3.2.1.52] | (RefSeq) Hexo1, Nag1; hexosaminidase 1	[G]	Carbohydrate transport and metabolism	Glycosyl hydrolase family 20, catalytic domain;; beta-acetyl hexosaminidase like	Chitooligosaccharidolytic beta-N-acetylglucosaminidase OS=Bombyx mori OX=7091 PE=1 SV=1	G	Carbohydrate transport and metabolism	chitooligosaccharidolytic beta-N-acetylglucosaminidase isoform X1 [Anoplophora glabripennis]
c52453.graph_c0	121	201	164	547	634	567	3.08	4.16	3.63	10.73	14.66	13.75	3.81051e-10	1.98027	up	--	--	--	--	--	--	--	--	--	--	uncharacterized protein LOC108916321 isoform X1 [Anoplophora glabripennis]
c59360.graph_c0	402	425	502	1718	1658	1480	9.94	8.39	9.94	28.3	30.93	35.15	8.49296e-13	1.97669	up	--	--	Cellular Component: integral component of membrane (GO:0016021);;	--	--	--	CD80-like C2-set immunoglobulin domain;; Immunoglobulin I-set domain;; Immunoglobulin domain;; Immunoglobulin domain	Fasciclin-3 OS=Drosophila melanogaster OX=7227 GN=Fas3 PE=1 SV=1	S	Function unknown	fasciclin-3 [Leptinotarsa decemlineata]
c55388.graph_c0	463	238	333	1242	1118	1548	10.48	4.54	6.66	22.23	23.31	35.96	1.49216e-05	1.97138	up	[F]	Nucleotide transport and metabolism	Cellular Component: membrane (GO:0016020);;	K11536|0|tca:660360|K11536 pyrimidine nucleoside transport protein | (RefSeq) solute carrier family 28 member 3	[FP]	--	Na+ dependent nucleoside transporter C-terminus;; Na+ dependent nucleoside transporter N-terminus;; Nucleoside recognition	--	F	Nucleotide transport and metabolism	sodium/nucleoside cotransporter 2 [Anoplophora glabripennis]
c58435.graph_c0	406	530	562	2850	1615	1049	4.63	4.9	5.59	73.67	45.54	31.21	2.02184e-06	1.95855	up	[O]	Posttranslational modification, protein turnover, chaperones	Molecular Function: ATP binding (GO:0005524);;	--	[O]	Posttranslational modification, protein turnover, chaperones	ATPase family associated with various cellular activities (AAA);; Bromodomain;; AAA domain (Cdc48 subfamily)	Tat-binding homolog 7 OS=Caenorhabditis elegans OX=6239 GN=lex-1 PE=1 SV=3	O	Posttranslational modification, protein turnover, chaperones	ATPase family AAA domain-containing protein 2 isoform X2 [Anoplophora glabripennis]
c53086.graph_c1	742	909	734	3790	2394	2493	37.4	36.9	32.04	147.41	109.68	119.6	2.59186e-10	1.95213	up	--	--	--	--	--	--	Haemolymph juvenile hormone binding protein (JHBP)	Protein takeout OS=Drosophila melanogaster OX=7227 GN=to PE=2 SV=1	S	Function unknown	protein takeout-like isoform X1 [Anoplophora glabripennis]
c56626.graph_c0	2690	3130	4039	6339	19998	8474	56.52	53.45	73.89	102.72	382.2	169.85	0.000279238	1.95102	up	--	--	Cellular Component: extracellular region (GO:0005576);; Biological Process: chitin metabolic process (GO:0006030);; Molecular Function: chitin binding (GO:0008061);;	--	--	--	Chitin binding Peritrophin-A domain	--	--	--	general transcriptional corepressor trfA-like [Anoplophora glabripennis]
c40889.graph_c0	4687	7066	3569	26592	19941	9665	401.92	489.77	265.8	1739.46	1526.9	776.58	3.55995e-05	1.94865	up	--	--	--	--	--	--	--	--	S	Function unknown	pro-resilin-like [Anoplophora glabripennis]
c57847.graph_c0	556	741	626	1530	2457	2777	7.14	7.9	7.08	15.55	29.33	34.97	6.29981e-07	1.94811	up	[H]	Coenzyme transport and metabolism	Biological Process: isoprenoid biosynthetic process (GO:0008299);; Molecular Function: transferase activity (GO:0016740);;	K12504|0|tca:662107|K12504 decaprenyl-diphosphate synthase subunit 1 [EC:2.5.1.91] | (RefSeq) decaprenyl-diphosphate synthase subunit 1	[H]	Coenzyme transport and metabolism	Polyprenyl synthetase;; Ribosomal L32p protein family	Decaprenyl-diphosphate synthase OS=Dictyostelium discoideum OX=44689 GN=coq1 PE=3 SV=1	H	Coenzyme transport and metabolism	decaprenyl-diphosphate synthase subunit 1 [Anoplophora glabripennis]
c56920.graph_c0	933	1242	1371	3675	5001	3781	14.09	15.25	18.04	42.86	68.84	54.59	7.6563e-10	1.94338	up	[O]	Posttranslational modification, protein turnover, chaperones	--	K07752|0|tca:655207|K07752 carboxypeptidase D [EC:3.4.17.22] | (RefSeq) carboxypeptidase D	[R]	General function prediction only	Zinc carboxypeptidase;; Carboxypeptidase regulatory-like domain;; CarboxypepD_reg-like domain;; PEGA domain	Carboxypeptidase D OS=Drosophila melanogaster OX=7227 GN=svr PE=1 SV=2	E	Amino acid transport and metabolism	carboxypeptidase D [Anoplophora glabripennis]
c50725.graph_c0	1030	1099	962	3958	4197	2977	25.33	21.96	20.6	75.03	93.8	69.78	3.9965e-10	1.94334	up	[E]	Amino acid transport and metabolism	Molecular Function: tyrosine 3-monooxygenase activity (GO:0004511);; Molecular Function: iron ion binding (GO:0005506);; Biological Process: aromatic amino acid family metabolic process (GO:0009072);; Biological Process: catecholamine biosynthetic process (GO:0042423);; Biological Process: oxidation-reduction process (GO:0055114);;	K00501|0|tca:654918|K00501 tyrosine 3-monooxygenase [EC:1.14.16.2] | (RefSeq) Th; tyrosine hydroxylase	[E]	Amino acid transport and metabolism	Biopterin-dependent aromatic amino acid hydroxylase	Tyrosine 3-monooxygenase OS=Drosophila melanogaster OX=7227 GN=ple PE=2 SV=2	E	Amino acid transport and metabolism	tyrosine 3-monooxygenase [Anoplophora glabripennis]
c53229.graph_c0	600	1038	655	1457	2921	3570	22.1	31.47	21	37.7	83.82	115.19	5.75266e-05	1.94176	up	--	--	Molecular Function: peptidase activity (GO:0008233);; Cellular Component: membrane (GO:0016020);;	--	[T]	Signal transduction mechanisms	Rhomboid family	Protein rhomboid OS=Drosophila melanogaster OX=7227 GN=rho PE=1 SV=2	S	Function unknown	protein rhomboid [Anoplophora glabripennis]
c58779.graph_c0	787	867	1074	3051	3869	2739	14.49	12.71	17.29	41.37	62.9	50.02	1.02881e-09	1.94032	up	--	--	--	--	[W]	Extracellular structures	Integrin alpha;; FG-GAP repeat	Integrin alpha-PS3 OS=Drosophila melanogaster OX=7227 GN=scb PE=1 SV=2	S	Function unknown	integrin alpha-5-like [Anoplophora glabripennis]
c54597.graph_c0	996	1066	949	3142	3484	4076	26.39	22.92	22.12	64.13	83.82	102.73	1.72978e-09	1.93868	up	--	--	--	--	--	--	--	--	--	--	uncharacterized protein LOC108914211 [Anoplophora glabripennis]
c59602.graph_c0	640	706	932	2393	3038	2569	4.86	4.46	6.01	13.9	20.58	18.27	1.23265e-09	1.93484	up	[P]	Inorganic ion transport and metabolism	Molecular Function: ATP binding (GO:0005524);; Biological Process: cation transport (GO:0006812);; Cellular Component: integral component of membrane (GO:0016021);; Molecular Function: ATPase activity (GO:0016887);; Molecular Function: metal ion binding (GO:0046872);;	K14951|0|tca:660831|K14951 cation-transporting ATPase 13A3/4/5 [EC:3.6.3.-] | (RefSeq) probable cation-transporting ATPase 13A3	[P]	Inorganic ion transport and metabolism	E1-E2 ATPase;; P5-type ATPase cation transporter;; haloacid dehalogenase-like hydrolase;; Cation transport ATPase (P-type)	Probable cation-transporting ATPase W08D2.5 OS=Caenorhabditis elegans OX=6239 GN=W08D2.5 PE=3 SV=2	U	Intracellular trafficking, secretion, and vesicular transport	probable cation-transporting ATPase 13A3 [Anoplophora glabripennis]
c51364.graph_c0	274	279	530	1357	1580	881	4.36	3.63	7.43	16.73	23.5	13.55	4.78018e-06	1.9298	up	[J]	Translation, ribosomal structure and biogenesis	Molecular Function: nucleotide binding (GO:0000166);; Molecular Function: RNA binding (GO:0003723);;	--	[R]	General function prediction only	RNA recognition motif. (a.k.a. RRM, RBD, or RNP domain)	Protein alan shepard OS=Drosophila mojavensis OX=7230 GN=shep PE=3 SV=1	S	Function unknown	protein alan shepard isoform X5 [Anoplophora glabripennis]
c55624.graph_c1	1101	2038	1742	4964	6202	5610	20.75	32.05	29.36	71.96	110.85	96.29	2.475e-09	1.92787	up	[V]	Defense mechanisms	Molecular Function: ATP binding (GO:0005524);; Biological Process: transport (GO:0006810);; Cellular Component: integral component of membrane (GO:0016021);; Molecular Function: ATPase activity (GO:0016887);;	--	[IR]	--	ABC-2 type transporter;; ABC-2 family transporter protein;; ABC transporter;; AAA domain, putative AbiEii toxin, Type IV TA system;; ABC-2 family transporter protein	ABC transporter G family member 23 OS=Dictyostelium discoideum OX=44689 GN=abcG23 PE=3 SV=2	V	Defense mechanisms	ABC transporter G family member 20 isoform X1 [Anoplophora glabripennis]
c46190.graph_c0	1672	3396	3399	8100	11267	9423	107.68	177.16	190.5	399.42	651.77	571.93	1.65466e-07	1.92213	up	[P]	Inorganic ion transport and metabolism	Biological Process: superoxide metabolic process (GO:0006801);; Molecular Function: oxidoreductase activity (GO:0016491);;	K04565|5.38869e-55|aag:AaeL_AAEL006271|K04565 superoxide dismutase, Cu-Zn family [EC:1.15.1.1] | (RefSeq) CUSOD2; AAEL006271-PC	[P]	Inorganic ion transport and metabolism	Copper/zinc superoxide dismutase (SODC)	Superoxide dismutase [Cu-Zn] OS=Halocynthia roretzi OX=7729 PE=1 SV=2	P	Inorganic ion transport and metabolism	superoxide dismutase [Cu-Zn]-like [Anoplophora glabripennis]
c59389.graph_c0	2979	1449	1204	5704	8264	6927	49.25	19.67	17.53	72.68	123.51	108.59	0.000428773	1.91797	up	--	--	--	--	--	--	Domain of unknown function (DUF4781)	--	S	Function unknown	uncharacterized protein LOC108906262 [Anoplophora glabripennis]
c58406.graph_c0	497	637	695	1307	3155	1826	3.25	3.38	3.95	6.59	18.8	11.41	2.37809e-05	1.91667	up	--	--	Molecular Function: calcium ion binding (GO:0005509);; Cellular Component: integral component of membrane (GO:0016021);;	--	[T]	Signal transduction mechanisms	Putative ephrin-receptor like;; EGF-like domain;; Human growth factor-like EGF;; HYR domain;; Concanavalin A-like lectin/glucanases superfamily	Fibropellin-1 OS=Strongylocentrotus purpuratus OX=7668 GN=EGF1 PE=1 SV=2	S	Function unknown	PREDICTED: LOW QUALITY PROTEIN: sushi, von Willebrand factor type A, EGF and pentraxin domain-containing protein 1 [Aethina tumida]
c56644.graph_c0	3665	7201	4790	13027	17831	22275	82.75	132.15	94.28	226.88	366.92	479.94	1.70008e-06	1.9153	up	[Q]	Secondary metabolites biosynthesis, transport and catabolism	Molecular Function: RNA binding (GO:0003723);; Molecular Function: adenosine deaminase activity (GO:0004000);; Biological Process: RNA processing (GO:0006396);; Molecular Function: oxidoreductase activity (GO:0016491);; Biological Process: oxidation-reduction process (GO:0055114);;	--	[A]	RNA processing and modification	Aldo/keto reductase family;; Adenosine-deaminase (editase) domain	tRNA-specific adenosine deaminase 1 OS=Drosophila melanogaster OX=7227 GN=Adat1 PE=1 SV=1	S	Function unknown	tRNA-specific adenosine deaminase 1 isoform X1 [Anoplophora glabripennis]
c59206.graph_c0	1065	1063	1185	3279	4205	3934	23.81	17.6	23.4	53.65	79.69	79.24	2.40753e-09	1.89696	up	--	--	Molecular Function: gap junction channel activity (GO:0005243);; Cellular Component: plasma membrane (GO:0005886);; Cellular Component: gap junction (GO:0005921);; Biological Process: ion transport (GO:0006811);; Cellular Component: integral component of membrane (GO:0016021);; Biological Process: transmembrane transport (GO:0055085);;	--	--	--	Innexin	Innexin inx1 OS=Schistocerca americana OX=7009 GN=inx1 PE=1 SV=1	S	Function unknown	innexin inx1 [Anoplophora glabripennis]
c48968.graph_c0	314	269	450	660	1667	1193	20.39	13.82	25.02	31.88	97.6	79.1	0.000155473	1.89157	up	--	--	--	--	[T]	Signal transduction mechanisms	--	--	S	Function unknown	neurogenic locus notch homolog protein 1-like [Anoplophora glabripennis]
c48579.graph_c0	160	142	212	371	684	692	5.73	3.73	5.9	9.36	20.7	22.65	2.62287e-05	1.88642	up	--	--	Molecular Function: protein binding (GO:0005515);; Cellular Component: endoplasmic reticulum membrane (GO:0005789);; Cellular Component: plasma membrane (GO:0005886);; Biological Process: response to oxidative stress (GO:0006979);; Biological Process: long-term memory (GO:0007616);; Biological Process: asymmetric protein localization (GO:0008105);; Biological Process: olfactory learning (GO:00083…	K17233|0|tca:659379|K17233 dual oxidase maturation factor 1 | (RefSeq) dual oxidase maturation factor 1	[S]	Function unknown	Dual oxidase maturation factor	Dual oxidase maturation factor 1 OS=Caenorhabditis elegans OX=6239 GN=doxa-1 PE=1 SV=2	U	Intracellular trafficking, secretion, and vesicular transport	dual oxidase maturation factor 1 isoform X1 [Anoplophora glabripennis]
c52387.graph_c0	142	122	290	847	593	476	2.47	1.73	4.39	11.38	9.4	7.92	3.4362e-05	1.88255	up	[T]	Signal transduction mechanisms	--	K09258|3.23211e-59|tca:655576|K09258 B-cell CLL/lymphoma protein 3 | (RefSeq) uncharacterized LOC655576	[R]	General function prediction only	Ankyrin repeats (3 copies);; Ankyrin repeats (many copies);; Ankyrin repeat;; Ankyrin repeats (many copies);; Ankyrin repeat	26S proteasome non-ATPase regulatory subunit 10 OS=Dictyostelium discoideum OX=44689 GN=psmD10 PE=2 SV=1	S	Function unknown	uncharacterized protein LOC108909987 [Anoplophora glabripennis]
c54729.graph_c0	1273	1539	1274	3957	5573	4347	24.24	23.82	21.12	58.13	96.6	79.02	1.02585e-08	1.88027	up	[R]	General function prediction only	--	K05719|0|tca:656761|K05719 integrin beta 1 | (RefSeq) integrin beta-PS	[TW]	--	Integrin beta chain VWA domain;; Integrin beta cytoplasmic domain;; Integrin beta tail domain;; EGF-like domain	Integrin beta-PS OS=Drosophila melanogaster OX=7227 GN=mys PE=1 SV=3	U	Intracellular trafficking, secretion, and vesicular transport	integrin beta-PS-like [Anoplophora glabripennis]
c51737.graph_c0	313	507	878	1456	1815	2286	16.69	22.55	40.77	59.73	87.19	115.93	4.46897e-05	1.86817	up	--	--	--	--	--	--	Domain of unknown function (DUF4789)	--	S	Function unknown	uncharacterized protein LOC108905852 [Anoplophora glabripennis]
c58729.graph_c0	320	543	426	1449	1454	1380	4.48	5.41	5.3	15.18	16.48	17.11	1.14783e-10	1.86447	up	[T]	Signal transduction mechanisms	Molecular Function: protein kinase activity (GO:0004672);; Biological Process: protein phosphorylation (GO:0006468);; Cellular Component: membrane (GO:0016020);; Molecular Function: ion binding (GO:0043167);;	--	[T]	Signal transduction mechanisms	Protein tyrosine kinase;; Protein kinase domain	Tyrosine kinase receptor Cad96Ca OS=Drosophila melanogaster OX=7227 GN=Cad96Ca PE=2 SV=2	T	Signal transduction mechanisms	tyrosine kinase receptor Cad96Ca, partial [Anoplophora glabripennis]
c53546.graph_c0	142	178	136	630	482	440	8.98	8.05	6.1	27.38	24.15	22.32	3.41541e-09	1.86293	up	--	--	Cellular Component: extracellular space (GO:0005615);; Molecular Function: structural constituent of cuticle (GO:0042302);;	--	--	--	Insect cuticle protein	Endocuticle structural glycoprotein SgAbd-9 OS=Schistocerca gregaria OX=7010 PE=1 SV=1	S	Function unknown	putative cuticle protein RR1-5, partial [Monochamus alternatus]
c55130.graph_c0	642	585	732	2122	2186	2317	7.66	5.68	7.63	19.53	23.81	26.41	1.584e-09	1.86164	up	[T]	Signal transduction mechanisms	Cellular Component: membrane (GO:0016020);; Molecular Function: kinase activity (GO:0016301);; Biological Process: phosphorylation (GO:0016310);;	--	[T]	Signal transduction mechanisms	Protein tyrosine kinase;; Protein kinase domain;; Fibronectin type III domain;; WSC domain	Putative tyrosine-protein kinase Wsck OS=Drosophila melanogaster OX=7227 GN=Wsck PE=2 SV=2	T	Signal transduction mechanisms	putative tyrosine-protein kinase Wsck [Anoplophora glabripennis]
c57196.graph_c1	387	510	537	1554	1863	1311	6.06	6.14	7.9	16.38	25.63	20.04	1.37888e-09	1.84377	up	[R]	General function prediction only	--	--	[R]	General function prediction only	Tub family;; Anaphase-promoting complex subunit 4 WD40 domain	Protein king tubby OS=Drosophila pseudoobscura pseudoobscura OX=46245 GN=king-tubby PE=3 SV=3	S	Function unknown	tubby-related protein 4 [Anoplophora glabripennis]
c53448.graph_c0	2281	2300	2861	2655	12108	9619	76.69	95.95	167.87	191.34	2477.24	2038.97	0.0029778	1.84322	up	[T]	Signal transduction mechanisms	Cellular Component: integral component of membrane (GO:0016021);;	K14026|0|tca:107398173|K14026 SEL1 protein | (RefSeq) protein sel-1 homolog 1	[MOT]	--	Sel1 repeat	--	S	Function unknown	protein sel-1 homolog 1 isoform X1 [Anoplophora glabripennis]
c46226.graph_c0	7394	7664	8021	24573	27228	24813	400.72	358.91	370.26	962.34	1414.24	1243.01	6.73296e-11	1.83881	up	--	--	--	K08059|2.97039e-90|tca:659790|K08059 interferon, gamma-inducible protein 30 | (RefSeq) gamma-interferon-inducible lysosomal thiol reductase	[O]	Posttranslational modification, protein turnover, chaperones	Gamma interferon inducible lysosomal thiol reductase (GILT)	GILT-like protein 1 OS=Drosophila melanogaster OX=7227 GN=GILT1 PE=2 SV=1	S	Function unknown	PREDICTED: gamma-interferon-inducible lysosomal thiol reductase-like [Dendroctonus ponderosae]
c59084.graph_c0	388	566	499	2050	1406	1352	9.98	14.22	12.1	22.13	21.26	21.01	2.85939e-10	1.83399	up	--	--	--	--	--	--	--	--	S	Function unknown	uncharacterized protein LOC108915052 [Anoplophora glabripennis]
c56087.graph_c2	1229	2199	1929	6659	5090	5668	44.63	64.75	61.25	189.74	170.54	199.48	2.51843e-10	1.83203	up	--	--	--	K10421|1.1211e-85|bmor:101739189|K10421 CAP-Gly domain-containing linker protein 1 | (RefSeq) restin homolog	[ZR]	--	CAP-Gly domain	Restin homolog OS=Drosophila melanogaster OX=7227 GN=CLIP-190 PE=1 SV=1	D	Cell cycle control, cell division, chromosome partitioning	CAP-Gly domain-containing linker protein 1 isoform X4 [Anoplophora glabripennis]
c58569.graph_c0	301	310	425	1019	1274	1101	4.93	4.4	5.96	12.83	19.06	17.27	2.57068e-08	1.83077	up	--	--	Molecular Function: protein disulfide isomerase activity (GO:0003756);; Cellular Component: endoplasmic reticulum (GO:0005783);; Molecular Function: oxidoreductase activity, acting on a sulfur group of donors, disulfide as acceptor (GO:0016671);; Biological Process: oxidation-reduction process (GO:0055114);;	K10950|0|tca:655911|K10950 ERO1-like protein alpha [EC:1.8.4.-] | (RefSeq) ero1-like protein	[OU]	--	Endoplasmic Reticulum Oxidoreductin 1 (ERO1)	Ero1-like protein OS=Drosophila melanogaster OX=7227 GN=Ero1L PE=2 SV=2	OU	--	ero1-like protein isoform X2 [Anoplophora glabripennis]
c50767.graph_c0	1330	2167	1719	10578	3171	3948	45.39	60.03	51.05	277.84	98.08	128.08	0.000247571	1.83003	up	[G]	Carbohydrate transport and metabolism	Cellular Component: integral component of membrane (GO:0016021);; Molecular Function: substrate-specific transmembrane transporter activity (GO:0022891);; Biological Process: transmembrane transport (GO:0055085);;	K08145|0|tca:661437|K08145 MFS transporter, SP family, solute carrier family 2 (facilitated glucose transporter), member 8 | (RefSeq) facilitated trehalose transporter Tret1	[R]	General function prediction only	Sugar (and other) transporter;; Major Facilitator Superfamily	Facilitated trehalose transporter Tret1 OS=Culex quinquefasciatus OX=7176 GN=Tret1 PE=3 SV=1	G	Carbohydrate transport and metabolism	facilitated trehalose transporter Tret1-like [Anoplophora glabripennis]
c49909.graph_c0	1586	2589	2150	5365	6706	8149	76.33	101.02	89.99	198.25	291.3	371.33	1.71021e-07	1.82068	up	--	--	--	--	--	--	--	--	--	--	uncharacterized protein LOC108903370 [Anoplophora glabripennis]
c51667.graph_c0	907	1283	1352	5125	3962	2550	19.89	23.92	29.1	97.79	100.4	63.42	1.17471e-07	1.82001	up	--	--	Cellular Component: integral component of membrane (GO:0016021);;	--	--	--	--	--	S	Function unknown	uncharacterized protein LOC108909882 [Anoplophora glabripennis]
c57836.graph_c0	166	196	276	696	910	468	1.92	2.01	2.71	6.74	9.97	5.77	5.7855e-06	1.81756	up	[G]	Carbohydrate transport and metabolism	Molecular Function: hydrolase activity, hydrolyzing O-glycosyl compounds (GO:0004553);; Biological Process: carbohydrate metabolic process (GO:0005975);; Cellular Component: integral component of membrane (GO:0016021);; Molecular Function: carbohydrate binding (GO:0030246);;	K12316|0|tca:658192|K12316 lysosomal alpha-glucosidase [EC:3.2.1.20] | (RefSeq) lysosomal alpha-glucosidase	[G]	Carbohydrate transport and metabolism	Glycosyl hydrolases family 31;; N-terminal barrel of NtMGAM and CtMGAM, maltase-glucoamylase;; Trefoil (P-type) domain;; Galactose mutarotase-like	Lysosomal acid alpha-glucosidase OS=Tetrahymena pyriformis OX=5908 PE=1 SV=1	G	Carbohydrate transport and metabolism	lysosomal alpha-glucosidase-like [Anoplophora glabripennis]
c56787.graph_c0	213	365	880	1034	2329	1218	3.05	4.25	10.98	11.43	30.39	16.68	0.00334166	1.81444	up	--	--	--	--	--	--	von Willebrand factor type C domain	--	S	Function unknown	mucin-3A isoform X1 [Anoplophora glabripennis]
c54746.graph_c0	366	596	601	902	2324	1707	9.18	12.14	12.24	17.76	42.69	36.22	0.000158165	1.81294	up	--	--	Cellular Component: extracellular region (GO:0005576);; Biological Process: chitin metabolic process (GO:0006030);; Molecular Function: chitin binding (GO:0008061);;	--	--	--	Chitin binding Peritrophin-A domain	--	S	Function unknown	DNA ligase 1-like [Anoplophora glabripennis]
c56713.graph_c0	2267	1470	3372	6604	9421	7050	59.79	29.7	71.96	124.87	212.91	164.9	5.87195e-05	1.79997	up	[G]	Carbohydrate transport and metabolism	Cellular Component: extracellular region (GO:0005576);; Biological Process: defense response to bacterium (GO:0042742);; Biological Process: regulation of innate immune response (GO:0045088);;	K20692|1.47037e-156|tca:660764|K20692 gram-negative bacteria-binding protein 3 | (RefSeq) GNBP, GNBP3; Gram-negative bacteria binding protein 3	--	--	Carbohydrate binding domain (family 32);; Glycosyl hydrolases family 16	Beta-1,3-glucan-binding protein OS=Tenebrio molitor OX=7067 GN=GRP PE=1 SV=1	S	Function unknown	beta-1,3-glucan-binding protein-like [Anoplophora glabripennis]
c57600.graph_c1	363	582	415	1383	1634	1303	8.89	9.17	7.4	20.27	28.46	23.53	1.26734e-08	1.79533	up	--	--	--	--	--	--	SH2 domain	--	--	--	uncharacterized protein LOC108904458 [Anoplophora glabripennis]
c56845.graph_c0	2987	1820	3131	6259	10507	8836	41.98	20.79	38.32	67.92	134.58	118.68	7.82368e-05	1.78021	up	[E]	Amino acid transport and metabolism	Cellular Component: membrane (GO:0016020);; Molecular Function: peptidase activity, acting on L-amino acid peptides (GO:0070011);;	K11140|0|tca:657160|K11140 aminopeptidase N [EC:3.4.11.2] | (RefSeq) aminopeptidase N	[EO]	--	Peptidase family M1 domain;; ERAP1-like C-terminal domain	Aminopeptidase N OS=Plutella xylostella OX=51655 GN=APN1 PE=1 SV=1	E	Amino acid transport and metabolism	aminopeptidase N isoform X1 [Anoplophora glabripennis]
c52516.graph_c0	608	796	996	2912	2070	2553	26.58	29.05	37.87	97.18	81.34	105.4	3.45938e-09	1.76962	up	--	--	Cellular Component: integral component of membrane (GO:0016021);;	K01185|1.33296e-56|tca:100142316|K01185 lysozyme [EC:3.2.1.17] | (RefSeq) lysozyme-like	--	--	C-type lysozyme/alpha-lactalbumin family	Lysozyme OS=Bombyx mori OX=7091 PE=1 SV=1	G	Carbohydrate transport and metabolism	lysozyme-like [Anoplophora glabripennis]
c58815.graph_c0	109	142	184	339	557	445	4.47	3.72	4.96	6.65	13.71	11.57	8.89987e-06	1.76266	up	--	--	--	--	--	--	--	--	--	--	hypothetical protein ALC62_11487, partial [Cyphomyrmex costatus]
c57003.graph_c0	894	1166	1211	2954	4549	2658	19.6	20.93	23.29	49.63	90.99	55.11	9.89866e-07	1.76105	up	--	--	--	--	--	--	Baculovirus F protein	--	S	Function unknown	uncharacterized protein LOC108911222 [Anoplophora glabripennis]
c49428.graph_c0	656	456	672	1570	2352	1715	38.1	21.45	33.93	69.93	122.95	94.09	1.64974e-05	1.75046	up	--	--	Cellular Component: membrane (GO:0016020);;	--	--	--	--	--	--	--	uncharacterized protein LOC108904282 [Anoplophora glabripennis]
c57248.graph_c1	10447	14362	14838	34383	48176	38559	298.58	331.66	368.63	753.12	1235.77	1040.43	3.23134e-08	1.74554	up	--	--	--	--	--	--	--	--	S	Function unknown	uncharacterized protein LOC108913215 [Anoplophora glabripennis]
c47041.graph_c0	602	956	717	2740	1876	2415	24.23	31.28	25.15	84.94	68.35	92.41	8.77091e-09	1.7455	up	--	--	Biological Process: signal transduction (GO:0007165);;	--	[R]	General function prediction only	Arrestin (or S-antigen), C-terminal domain;; Arrestin (or S-antigen), N-terminal domain	Arrestin domain-containing protein 17 OS=Caenorhabditis elegans OX=6239 GN=arrd-17 PE=1 SV=2	S	Function unknown	arrestin domain-containing protein 2 isoform X1 [Anoplophora glabripennis]
c57368.graph_c0	180	183	234	711	612	540	2.86	2.37	3.24	8.73	8.85	8.22	8.20998e-09	1.74362	up	[F]	Nucleotide transport and metabolism	--	--	[T]	Signal transduction mechanisms	Guanylate kinase;; PDZ domain (Also known as DHR or GLGF);; PDZ domain;; SH3 domain;; Variant SH3 domain;; Tricorn protease PDZ domain	Peripheral plasma membrane protein CASK OS=Drosophila melanogaster OX=7227 GN=CASK PE=1 SV=4	F	Nucleotide transport and metabolism	PREDICTED: LOW QUALITY PROTEIN: MAGUK p55 subfamily member 6 [Aethina tumida]
c53974.graph_c0	12818	14920	23760	30209	65854	59452	467.03	439.15	747.62	842.93	2157.93	2061.95	0.000234943	1.74116	up	[O]	Posttranslational modification, protein turnover, chaperones	Molecular Function: serine-type endopeptidase activity (GO:0004252);; Biological Process: proteolysis (GO:0006508);;	--	[E]	Amino acid transport and metabolism	Trypsin	Phenoloxidase-activating factor 2 OS=Holotrichia diomphalia OX=33394 GN=PPAF2 PE=1 SV=1	O	Posttranslational modification, protein turnover, chaperones	tryptase alpha/beta-1 [Anoplophora glabripennis]
c51013.graph_c0	195	343	260	865	705	864	7.83	11.17	9.08	26.7	25.6	32.93	2.5308e-08	1.73947	up	--	--	--	--	--	--	--	--	--	--	cell wall integrity and stress response component 3-like [Anoplophora glabripennis]
c54751.graph_c3	293	389	244	820	938	1090	9.87	10.61	7.13	21.22	28.58	34.83	2.19459e-06	1.73727	up	[Q]	Secondary metabolites biosynthesis, transport and catabolism	--	--	[S]	Function unknown	Domain of unknown function (DUF1794)	Uncharacterized protein C28H8.5 OS=Caenorhabditis elegans OX=6239 GN=C28H8.5 PE=3 SV=1	S	Function unknown	THAP domain-containing protein 4-like [Anoplophora glabripennis]
c58999.graph_c0	1823	1666	2209	6628	6628	4476	16.49	12.25	17.4	46.32	54.71	38.75	1.53391e-07	1.73122	up	[R]	General function prediction only	Molecular Function: endopeptidase inhibitor activity (GO:0004866);; Cellular Component: extracellular space (GO:0005615);; Biological Process: negative regulation of endopeptidase activity (GO:0010951);;	K06530|0|tca:661594|K06530 CD109 antigen | (RefSeq) CD109 antigen	[O]	Posttranslational modification, protein turnover, chaperones	A-macroglobulin complement component;; A-macroglobulin receptor;; Alpha-2-macroglobulin family;; Alpha-2-macroglobulin family N-terminal region;; MG2 domain;; Alpha-macro-globulin thiol-ester bond-forming region	--	S	Function unknown	CD109 antigen-like isoform X1 [Anoplophora glabripennis]
c52927.graph_c0	212	338	287	1011	738	804	8.64	11.17	10.16	31.64	27.21	31.12	2.40885e-09	1.72826	up	[O]	Posttranslational modification, protein turnover, chaperones	Molecular Function: hydrolase activity (GO:0016787);;	K02857|6.60863e-84|tca:661276|K02857 rhomboid-related protein 1/2/3 [EC:3.4.21.105] | (RefSeq) rhomboid-related protein 2	[T]	Signal transduction mechanisms	Rhomboid family;; EF-hand domain pair;; EF hand;; EF-hand domain;; EF hand	Rhomboid-related protein 1 OS=Caenorhabditis elegans OX=6239 GN=rom-1 PE=3 SV=2	S	Function unknown	rhomboid-related protein 3-like [Anoplophora glabripennis]
c53870.graph_c0	1673	2250	2445	5818	5651	7731	20.78	22.54	26.63	70.6	80.76	116.47	5.87208e-08	1.72507	up	[O]	Posttranslational modification, protein turnover, chaperones	Molecular Function: serine-type peptidase activity (GO:0008236);; Cellular Component: membrane (GO:0016020);; Molecular Function: transferase activity, transferring acyl groups (GO:0016746);; Molecular Function: metal ion binding (GO:0046872);;	K18932|2.93484e-162|tca:658317|K18932 palmitoyltransferase [EC:2.3.1.225] | (RefSeq) probable palmitoyltransferase ZDHHC16	[R]	General function prediction only	Trypsin;; DHHC palmitoyltransferase	Serine protease snake OS=Drosophila melanogaster OX=7227 GN=snk PE=1 SV=2	O	Posttranslational modification, protein turnover, chaperones	serine protease snake-like [Anoplophora glabripennis]
c52857.graph_c0	292	483	469	637	1313	1715	8.87	11.93	12.41	14.92	36.21	49.59	0.000604084	1.71801	up	--	--	Cellular Component: endoplasmic reticulum membrane (GO:0005789);; Biological Process: transport (GO:0006810);; Cellular Component: integral component of membrane (GO:0016021);;	K20351|6.77779e-139|tca:663625|K20351 p24 family protein gamma-5 | (RefSeq) transmembrane emp24 domain-containing protein A	[U]	Intracellular trafficking, secretion, and vesicular transport	emp24/gp25L/p24 family/GOLD	Transmembrane emp24 domain-containing protein B OS=Dictyostelium discoideum OX=44689 GN=empB PE=3 SV=1	U	Intracellular trafficking, secretion, and vesicular transport	transmembrane emp24 domain-containing protein 5 [Anoplophora glabripennis]
c49659.graph_c0	1436	2028	1659	2474	7194	5571	86.15	98.51	86.55	113.7	388.32	315.5	0.000729313	1.71552	up	--	--	--	--	--	--	Complex I intermediate-associated protein 30 (CIA30)	--	S	Function unknown	uncharacterized protein LOC108917585 isoform X2 [Anoplophora glabripennis]
c58415.graph_c0	787	1151	1372	2145	4174	3469	20.08	23.23	30.6	45.94	109.36	93.21	4.25448e-05	1.71484	up	[O]	Posttranslational modification, protein turnover, chaperones	--	K00683|7.22139e-70|tca:659407|K00683 glutaminyl-peptide cyclotransferase [EC:2.3.2.5] | (RefSeq) glutaminyl-peptide cyclotransferase-like protein	[O]	Posttranslational modification, protein turnover, chaperones	Peptidase family M28;; Peptidase family M28	Glutaminyl-peptide cyclotransferase OS=Dictyostelium discoideum OX=44689 GN=qpct PE=3 SV=1	S	Function unknown	glutaminyl-peptide cyclotransferase [Anoplophora glabripennis]
c49872.graph_c0	526	646	850	1427	1950	2602	22.96	22.44	31.88	47.72	75.54	105.97	2.50305e-05	1.70504	up	[P]	Inorganic ion transport and metabolism	--	K01672|8.6131e-145|tca:658563|K01672 carbonic anhydrase [EC:4.2.1.1] | (RefSeq) carbonic anhydrase 1	[R]	General function prediction only	Eukaryotic-type carbonic anhydrase	Putative carbonic anhydrase 3 OS=Caenorhabditis elegans OX=6239 GN=cah-3 PE=3 SV=1	P	Inorganic ion transport and metabolism	carbonic anhydrase 2 isoform X2 [Anoplophora glabripennis]
c49904.graph_c0	157	301	194	612	626	693	3.64	5.67	3.92	10.94	13.19	15.32	9.62692e-07	1.70483	up	--	--	Molecular Function: protein-glutamine gamma-glutamyltransferase activity (GO:0003810);; Biological Process: peptide cross-linking (GO:0018149);; Molecular Function: metal ion binding (GO:0046872);;	K05619|0|tca:663265|K05619 transglutaminase 1 [EC:2.3.2.13] | (RefSeq) hemocyte protein-glutamine gamma-glutamyltransferase	--	--	Transglutaminase family, C-terminal ig like domain;; Transglutaminase family;; Transglutaminase-like superfamily	Hemocyte protein-glutamine gamma-glutamyltransferase OS=Tachypleus tridentatus OX=6853 PE=1 SV=1	O	Posttranslational modification, protein turnover, chaperones	hemocyte protein-glutamine gamma-glutamyltransferase-like [Anoplophora glabripennis]
c53587.graph_c0	173	236	159	552	574	583	4.79	5.31	3.83	11.78	14.44	15.38	2.01859e-07	1.70431	up	[O]	Posttranslational modification, protein turnover, chaperones	Molecular Function: hydrolase activity (GO:0016787);;	--	[E]	Amino acid transport and metabolism	Trypsin;; Regulatory CLIP domain of proteinases	Phenoloxidase-activating factor 1 OS=Holotrichia diomphalia OX=33394 GN=PPAF1 PE=1 SV=1	O	Posttranslational modification, protein turnover, chaperones	serine protease 7-like [Anoplophora glabripennis]
c59159.graph_c0	1417	1795	1538	4197	5377	4427	19.74	19.97	17.95	51.95	62.3	56.1	2.81104e-08	1.68006	up	--	--	--	--	--	--	Peptidase family M13;; Peptidase family M13	--	O	Posttranslational modification, protein turnover, chaperones	endothelin-converting enzyme homolog isoform X2 [Anoplophora glabripennis]
c51160.graph_c0	745	838	669	4827	996	1301	31.86	28.23	23.76	154.04	37.24	48.36	0.00795632	1.67827	up	--	--	--	--	--	--	--	--	S	Function unknown	uncharacterized protein LOC108913748 [Anoplophora glabripennis]
c59414.graph_c0	168	300	308	940	704	627	4.69	6.92	5.68	11.83	7.79	10.83	3.57894e-07	1.67481	up	[D]	Cell cycle control, cell division, chromosome partitioning	Molecular Function: zinc ion binding (GO:0008270);;	--	[D]	Cell cycle control, cell division, chromosome partitioning	LIM domain	Hillarin OS=Drosophila melanogaster OX=7227 GN=Hil PE=1 SV=1	D	Cell cycle control, cell division, chromosome partitioning	hillarin [Anoplophora glabripennis]
c56484.graph_c0	706	939	1124	1430	3353	3169	14.16	15.35	19.84	21.92	60.8	60.51	0.000451224	1.67167	up	[G]	Carbohydrate transport and metabolism	Biological Process: transport (GO:0006810);; Cellular Component: membrane (GO:0016020);; Molecular Function: transmembrane transporter activity (GO:0022857);;	--	[R]	General function prediction only	Sugar (and other) transporter;; Major Facilitator Superfamily	Facilitated trehalose transporter Tret1-2 homolog OS=Drosophila sechellia OX=7238 GN=Tret1-2 PE=3 SV=1	G	Carbohydrate transport and metabolism	facilitated trehalose transporter Tret1-like isoform X1 [Anoplophora glabripennis]
c56643.graph_c0	2105	1643	3221	6767	8795	5075	54.23	34.13	76.11	129.31	203.47	120.27	9.09589e-05	1.66784	up	--	--	--	K06515|2.54718e-29|tca:103314504|K06515 solute carrier family 44 (choline transporter-like protein), member 1 | (RefSeq) choline transporter-like protein 1	[I]	Lipid transport and metabolism	Plasma-membrane choline transporter	CTL-like protein 1 OS=Aedes aegypti OX=7159 GN=AAEL001935 PE=3 SV=1	S	Function unknown	uncharacterized protein LOC108908198 [Anoplophora glabripennis]
c59972.graph_c0	4810	4129	4718	9536	15147	15481	177.55	123.65	151.5	270.71	506.16	542.61	3.01697e-05	1.66401	up	[O]	Posttranslational modification, protein turnover, chaperones	Molecular Function: arginine kinase activity (GO:0004054);; Molecular Function: ATP binding (GO:0005524);; Biological Process: phosphorylation (GO:0016310);;	K00933|0|tca:660479|K00933 creatine kinase [EC:2.7.3.2] | (RefSeq) arginine kinase	[C]	Energy production and conversion	ATP:guanido phosphotransferase, C-terminal catalytic domain;; ATP:guanido phosphotransferase, N-terminal domain	Arginine kinase OS=Drosophila melanogaster OX=7227 GN=Argk PE=2 SV=2	E	Amino acid transport and metabolism	arginine kinase [Monochamus alternatus]
c59067.graph_c0	109	167	139	278	519	392	0.93	1.17	1.02	1.83	4.12	3.17	7.28132e-05	1.65862	up	[N]	Cell motility	Molecular Function: chitin synthase activity (GO:0004100);; Cellular Component: integral component of membrane (GO:0016021);;	K00698|0|tca:641504|K00698 chitin synthase [EC:2.4.1.16] | (RefSeq) Chs1, TcChs1; chitin synthase 1	[M]	Cell wall/membrane/envelope biogenesis	Chitin synthase;; Glycosyl transferase family group 2	Chitin synthase chs-2 OS=Caenorhabditis elegans OX=6239 GN=chs-2 PE=1 SV=1	M	Cell wall/membrane/envelope biogenesis	uncharacterized protein LOC108904526 isoform X1 [Anoplophora glabripennis]
c53165.graph_c0	192	142	193	494	221	846	3.41	2.05	2.86	15.59	7.32	17.8	0.00588071	1.64829	up	[K]	Transcription	--	--	[R]	General function prediction only	Leucine rich repeat;; Leucine rich repeats (6 copies);; Leucine Rich repeats (2 copies);; Leucine-rich repeat;; Leucine Rich Repeat	Protein artichoke OS=Drosophila melanogaster OX=7227 GN=atk PE=1 SV=2	S	Function unknown	slit homolog 3 protein-like [Anoplophora glabripennis]
c53518.graph_c0	916	1351	975	2728	2908	3653	26.03	31.18	24.14	59.72	75.02	98.86	7.55725e-07	1.64789	up	--	--	--	--	--	--	--	--	S	Function unknown	uncharacterized protein LOC108914397 [Anoplophora glabripennis]
c51094.graph_c0	1164	915	1482	3774	2971	3704	46.31	29.62	51.66	116.33	107.12	139.73	2.83125e-06	1.64716	up	--	--	Cellular Component: integral component of membrane (GO:0016021);;	K12386|2.69927e-179|tca:655809|K12386 cystinosin | (RefSeq) cystinosin homolog	[E]	Amino acid transport and metabolism	PQ loop repeat	Cystinosin homolog OS=Drosophila melanogaster OX=7227 GN=CG17119 PE=1 SV=2	U	Intracellular trafficking, secretion, and vesicular transport	cystinosin homolog [Anoplophora glabripennis]
c53792.graph_c0	1150	1301	1713	6309	3826	2209	32.71	30	42.41	137.71	98.74	59.33	0.000178504	1.64503	up	[O]	Posttranslational modification, protein turnover, chaperones	--	--	[V]	Defense mechanisms	Serpin (serine protease inhibitor);; Serpin (serine protease inhibitor)	Serine protease inhibitor 28Dc OS=Drosophila melanogaster OX=7227 GN=Spn28Dc PE=2 SV=2	O	Posttranslational modification, protein turnover, chaperones	serpin B6-like [Anoplophora glabripennis]
c56211.graph_c0	432	640	483	1404	2384	708	18.74	18.12	11.93	24.3	45.6	25.24	0.0016532	1.64373	up	--	--	--	--	--	--	Immunoglobulin domain;; Immunoglobulin domain;; Immunoglobulin I-set domain;; Immunoglobulin domain	Protein slit OS=Drosophila melanogaster OX=7227 GN=sli PE=1 SV=2	S	Function unknown	LOW QUALITY PROTEIN: uncharacterized protein LOC108910229 [Anoplophora glabripennis]
c55596.graph_c0	1167	1502	1768	3017	5507	4066	30.71	31.68	39.75	59.2	126.94	97.56	2.49261e-05	1.6436	up	[E]	Amino acid transport and metabolism	Molecular Function: asparagine synthase (glutamine-hydrolyzing) activity (GO:0004066);; Biological Process: asparagine biosynthetic process (GO:0006529);;	K01953|0|tca:100141713|K01953 asparagine synthase (glutamine-hydrolysing) [EC:6.3.5.4] | (RefSeq) asparagine synthetase [glutamine-hydrolyzing]	[E]	Amino acid transport and metabolism	Asparagine synthase;; Glutamine amidotransferase domain;; Glutamine amidotransferase domain	Probable asparagine synthetase [glutamine-hydrolyzing] OS=Dictyostelium discoideum OX=44689 GN=asns PE=1 SV=1	E	Amino acid transport and metabolism	asparagine synthetase [glutamine-hydrolyzing] [Anoplophora glabripennis]
c58383.graph_c0	925	867	944	1496	2625	3743	23.3	17.77	20.72	29.1	60.08	89.69	0.000675615	1.64297	up	[V]	Defense mechanisms	Molecular Function: peroxidase activity (GO:0004601);; Molecular Function: peroxiredoxin activity (GO:0051920);; Biological Process: oxidation-reduction process (GO:0055114);; Biological Process: cellular oxidant detoxification (GO:0098869);;	K13279|7.22347e-113|tca:659393|K13279 peroxiredoxin 1 [EC:1.11.1.15] | (RefSeq) peroxiredoxin 1	[O]	Posttranslational modification, protein turnover, chaperones	AhpC/TSA family;; C-terminal domain of 1-Cys peroxiredoxin;; Redoxin	Peroxiredoxin 1 OS=Drosophila melanogaster OX=7227 GN=Jafrac1 PE=1 SV=1	O	Posttranslational modification, protein turnover, chaperones	peroxiredoxin 1 [Anoplophora glabripennis]
c56116.graph_c0	3954	3195	4639	6461	18202	9364	77.51	50.9	79.19	97.71	324.71	175.18	0.00194364	1.64102	up	[R]	General function prediction only	--	--	[MW]	--	Fasciclin domain	--	M	Cell wall/membrane/envelope biogenesis	transforming growth factor-beta-induced protein ig-h3 [Anoplophora glabripennis]
c55728.graph_c0	1556	2252	2993	4505	8361	6225	33.71	39.4	55.52	61.4	124.08	94.48	8.73016e-05	1.63944	up	[E]	Amino acid transport and metabolism	Molecular Function: obsolete gamma-glutamyltransferase activity (GO:0003840);; Biological Process: glutathione metabolic process (GO:0006749);;	K18592|0|tca:663258|K18592 gamma-glutamyltranspeptidase / glutathione hydrolase / leukotriene-C4 hydrolase [EC:2.3.2.2 3.4.19.13 3.4.19.14] | (RefSeq) gamma-glutamyltranspeptidase 1	[E]	Amino acid transport and metabolism	Gamma-glutamyltranspeptidase;; Group 7 allergen	--	E	Amino acid transport and metabolism	glutathione hydrolase 1 proenzyme isoform X2 [Anoplophora glabripennis]
c52179.graph_c0	507	556	451	2064	1207	1182	11.86	10.53	9.06	36.94	25.46	26.17	3.67424e-06	1.63089	up	--	--	--	--	--	--	Spaetzle	Protein spaetzle 3 OS=Drosophila melanogaster OX=7227 GN=spz3 PE=2 SV=2	S	Function unknown	protein spaetzle 3 [Anoplophora glabripennis]
c58601.graph_c0	108	130	169	438	433	294	0.73	0.72	1	2.23	2.61	1.84	2.76356e-06	1.62976	up	--	--	Molecular Function: motor activity (GO:0003774);; Molecular Function: ATP binding (GO:0005524);; Cellular Component: myosin complex (GO:0016459);; Biological Process: intracellular signal transduction (GO:0035556);; Molecular Function: metal ion binding (GO:0046872);;	K10360|0|tca:656579|K10360 myosin IX | (RefSeq) Myo9; myosin 9	[N]	Cell motility	Myosin head (motor domain);; RhoGAP domain;; IQ calmodulin-binding motif;; Phorbol esters/diacylglycerol binding domain (C1 domain);; Ras association (RalGDS/AF-6) domain	Myosin-I heavy chain OS=Dictyostelium discoideum OX=44689 GN=myoI PE=1 SV=1	Z	Cytoskeleton	unconventional myosin-IXa isoform X1 [Anoplophora glabripennis]
c50874.graph_c0	1241	1795	1777	5237	5630	2838	9.55	10.91	11.38	29.06	38.19	20.48	1.16574e-05	1.62382	up	[T]	Signal transduction mechanisms	Molecular Function: binding (GO:0005488);; Cellular Component: membrane (GO:0016020);; Molecular Function: oxidoreductase activity (GO:0016491);; Biological Process: response to stimulus (GO:0050896);;	K13411|0|cfo:105249651|K13411 dual oxidase [EC:1.6.3.1 1.11.1.-] | (RefSeq) dual oxidase 2-like	[PQ]	--	Animal haem peroxidase;; Ferric reductase NAD binding domain;; FAD-binding domain;; Ferric reductase like transmembrane component;; EF hand;; EF-hand domain pair;; EF-hand domain;; Neuronal voltage-dependent calcium channel alpha 2acd;; Cache domain;; Animal haem peroxidase;; VWA N-terminal;; von Willebrand factor type A domain	Dual oxidase OS=Drosophila melanogaster OX=7227 GN=Duox PE=1 SV=2	U	Intracellular trafficking, secretion, and vesicular transport	dual oxidase 2-like [Anoplophora glabripennis]
c58303.graph_c0	978	1169	1302	3459	2490	3846	14.36	14.44	16.47	44.22	38.8	62.79	3.6374e-07	1.62193	up	[P]	Inorganic ion transport and metabolism	Molecular Function: transporter activity (GO:0005215);; Biological Process: transport (GO:0006810);; Cellular Component: integral component of membrane (GO:0016021);;	K12347|0|tca:655866|K12347 natural resistance-associated macrophage protein | (RefSeq) protein Malvolio	[P]	Inorganic ion transport and metabolism	Natural resistance-associated macrophage protein	Protein Malvolio OS=Drosophila melanogaster OX=7227 GN=Mvl PE=2 SV=2	P	Inorganic ion transport and metabolism	protein Malvolio isoform X1 [Anoplophora glabripennis]
c52480.graph_c0	559	666	593	1351	1582	2193	19.26	18.69	17.84	35.75	49.53	71.11	1.07864e-05	1.61923	up	--	--	Cellular Component: integral component of membrane (GO:0016021);;	--	[R]	General function prediction only	Leucine rich repeat;; Leucine Rich repeats (2 copies)	--	S	Function unknown	phospholipase A2 inhibitor [Anoplophora glabripennis]
c52456.graph_c0	416	437	355	919	1439	1083	13.33	11.38	9.63	22.91	42.47	33.53	2.16954e-05	1.61729	up	--	--	Cellular Component: membrane part (GO:0044425);;	K17233|2.82866e-145|tca:660375|K17233 dual oxidase maturation factor 1 | (RefSeq) dual oxidase maturation factor 1	[S]	Function unknown	Dual oxidase maturation factor	Dual oxidase maturation factor 1 OS=Caenorhabditis elegans OX=6239 GN=doxa-1 PE=1 SV=2	U	Intracellular trafficking, secretion, and vesicular transport	dual oxidase maturation factor 1 [Anoplophora glabripennis]
c56250.graph_c0	262	212	322	579	997	669	6.1	4	6.52	10.36	21.04	14.82	0.000169904	1.60417	up	--	--	--	--	--	--	--	--	--	--	uncharacterized protein LOC108914211 [Anoplophora glabripennis]
c54859.graph_c0	340	392	444	1448	955	936	6.7	6.39	7.4	21.44	16.76	16.91	1.35942e-07	1.60276	up	--	--	--	--	--	--	--	--	S	Function unknown	uncharacterized protein LOC108908962 isoform X1 [Anoplophora glabripennis]
c42750.graph_c0	130	369	214	320	745	847	4.73	14.66	9.2	9.25	29.9	31.51	0.00591477	1.60261	up	[F]	Nucleotide transport and metabolism	Biological Process: deoxyribonucleoside diphosphate metabolic process (GO:0009186);; Cellular Component: integral component of membrane (GO:0016021);; Molecular Function: oxidoreductase activity (GO:0016491);; Biological Process: oxidation-reduction process (GO:0055114);;	K10808|0|tca:657724|K10808 ribonucleoside-diphosphate reductase subunit M2 [EC:1.17.4.1] | (RefSeq) ribonucleoside-diphosphate reductase subunit M2 B	[F]	Nucleotide transport and metabolism	Ribonucleotide reductase, small chain	Ribonucleoside-diphosphate reductase subunit M2 OS=Drosophila melanogaster OX=7227 GN=RnrS PE=1 SV=2	F	Nucleotide transport and metabolism	ribonucleoside-diphosphate reductase subunit M2 B [Anoplophora glabripennis]
c59407.graph_c0	461	678	977	2605	2440	889	3.42	3.84	6.31	18.64	21.42	6.31	0.00177715	1.59544	up	--	--	Molecular Function: guanyl-nucleotide exchange factor activity (GO:0005085);; Cellular Component: intracellular (GO:0005622);; Biological Process: small GTPase mediated signal transduction (GO:0007264);; Biological Process: positive regulation of GTPase activity (GO:0043547);;	--	[T]	Signal transduction mechanisms	Dock homology region 2;; C2 domain in Dock180 and Zizimin proteins;; PH domain	--	S	Function unknown	dedicator of cytokinesis protein 9 [Anoplophora glabripennis]
c48019.graph_c0	957	1382	1400	1661	4149	4333	54.22	63.48	68.98	72.14	211.65	231.89	0.00162083	1.59322	up	--	--	--	--	[TV]	--	Lectin C-type domain	--	S	Function unknown	uncharacterized protein LOC108905782 [Anoplophora glabripennis]
c55254.graph_c0	201	200	244	532	660	605	5.96	4.95	5.98	12.19	17.93	18.17	1.56701e-06	1.59262	up	--	--	--	--	--	--	--	--	--	--	uncharacterized protein LOC108916324 [Anoplophora glabripennis]
c55307.graph_c0	200	283	395	1488	554	469	4.21	4.84	7.23	24.14	10.6	9.41	0.00272911	1.59124	up	--	--	--	--	--	--	Chitin binding Peritrophin-A domain	--	S	Function unknown	uncharacterized protein LOC108911097 [Anoplophora glabripennis]
c50734.graph_c0	106	168	157	349	415	415	2.83	3.31	3.87	5.62	8.4	8.35	1.84173e-06	1.59019	up	[R]	General function prediction only	--	--	[R]	General function prediction only	Ankyrin repeats (3 copies);; Ankyrin repeat;; Ankyrin repeats (many copies);; Ankyrin repeats (many copies);; Ankyrin repeat	Ankyrin repeat and KH domain-containing protein mask-1 OS=Caenorhabditis elegans OX=6239 GN=mask-1 PE=3 SV=3	S	Function unknown	ankyrin repeat domain-containing protein 6-like [Leptinotarsa decemlineata]
c55810.graph_c0	184	253	166	506	566	584	4.83	5.4	3.8	10.24	13.5	14.62	5.27771e-06	1.57579	up	--	--	--	--	--	--	--	--	--	--	uncharacterized protein LOC108913725 [Anoplophora glabripennis]
c37025.graph_c0	2690	3286	4194	7132	8587	11779	773.47	752.42	1040.31	1516.2	2100.36	3022.56	3.06943e-05	1.57306	up	--	--	Cellular Component: membrane (GO:0016020);;	--	--	--	--	--	--	--	hypothetical protein YQE_08505, partial [Dendroctonus ponderosae]
c53147.graph_c0	4547	3866	4463	10359	13578	11631	184.51	127.24	157.52	323.06	498.29	447.74	5.76635e-06	1.56515	up	--	--	--	--	[E]	Amino acid transport and metabolism	Trypsin;; Serine protease gd N-terminus	Proclotting enzyme OS=Tachypleus tridentatus OX=6853 PE=1 SV=1	O	Posttranslational modification, protein turnover, chaperones	trypsin beta-like [Anoplophora glabripennis]
c52230.graph_c0	1466	3129	1774	3500	7859	5467	70.84	123.3	74.25	130.63	343.04	251.04	0.00148155	1.55935	up	--	--	Cellular Component: extracellular region (GO:0005576);; Biological Process: chitin metabolic process (GO:0006030);; Molecular Function: chitin binding (GO:0008061);; Cellular Component: integral component of membrane (GO:0016021);;	--	--	--	Chitin binding Peritrophin-A domain	Protein obstructor-E OS=Drosophila melanogaster OX=7227 GN=obst-E PE=2 SV=2	S	Function unknown	protein obstructor-E-like [Anoplophora glabripennis]
c51946.graph_c0	205	371	234	1230	673	354	6.9	10.14	6.86	31.88	20.57	11.33	0.00268113	1.55886	up	[M]	Cell wall/membrane/envelope biogenesis	Molecular Function: hydrolase activity (GO:0016787);; Biological Process: primary metabolic process (GO:0044238);; Biological Process: organic substance metabolic process (GO:0071704);;	K01201|1.62412e-161|tca:664564|K01201 glucosylceramidase [EC:3.2.1.45] | (RefSeq) glucosylceramidase-like	[G]	Carbohydrate transport and metabolism	Glycosyl hydrolase family 30 TIM-barrel domain;; Glycosyl hydrolase family 30 beta sandwich domain	Putative glucosylceramidase 4 OS=Caenorhabditis elegans OX=6239 GN=gba-4 PE=3 SV=2	G	Carbohydrate transport and metabolism	putative glucosylceramidase 3 [Anoplophora glabripennis]
c49678.graph_c0	123	133	208	395	434	423	9.74	8.52	14.31	23.89	30.74	31.44	1.37812e-05	1.5565	up	--	--	--	--	--	--	Ecdysteroid kinase	--	S	Function unknown	uncharacterized protein LOC108904810 [Anoplophora glabripennis]
c59560.graph_c0	193	419	261	752	731	784	4.94	8.55	5.83	15.38	17.58	19.42	2.64101e-05	1.52046	up	--	--	--	--	--	--	--	--	--	--	uncharacterized protein LOC111692732, partial [Anoplophora glabripennis]
c59621.graph_c0	9957	12409	11437	42232	29012	19907	52.14	53.75	52.79	167.89	132.56	100.01	1.53872e-05	1.51869	up	--	--	Molecular Function: calcium ion binding (GO:0005509);; Cellular Component: integral component of membrane (GO:0016021);;	--	[T]	Signal transduction mechanisms	EGF domain	Cuticlin-1 OS=Caenorhabditis elegans OX=6239 GN=cut-1 PE=2 SV=2	S	Function unknown	uncharacterized protein LOC108904997 [Anoplophora glabripennis]
c54076.graph_c0	1212	1555	1231	3412	4263	2803	48.54	50.69	43.11	101.33	153.8	101.23	4.89577e-06	1.5031	up	--	--	--	K06560|4.08875e-29|pss:102456704|K06560 mannose receptor, C type | (RefSeq) macrophage mannose receptor 1-like	[TV]	--	Lectin C-type domain	Perlucin OS=Haliotis laevigata OX=36097 PE=1 SV=3	S	Function unknown	macrophage mannose receptor 1 [Anoplophora glabripennis]
c52811.graph_c0	1026	1136	1205	1301	3381	3956	26.67	23.98	27.26	26.05	79.83	97.96	0.00591794	1.4968	up	--	--	Biological Process: protein N-linked glycosylation (GO:0006487);; Cellular Component: oligosaccharyltransferase complex (GO:0008250);; Cellular Component: integral component of membrane (GO:0016021);; Molecular Function: transferase activity (GO:0016740);;	K12667|0|tca:660020|K12667 oligosaccharyltransferase complex subunit delta (ribophorin II) | (RefSeq) dolichyl-diphosphooligosaccharide--protein glycosyltransferase subunit 2	[O]	Posttranslational modification, protein turnover, chaperones	Oligosaccharyltransferase subunit Ribophorin II	Dolichyl-diphosphooligosaccharide--protein glycosyltransferase subunit 2 OS=Caenorhabditis elegans OX=6239 GN=ostd-1 PE=3 SV=1	S	Function unknown	dolichyl-diphosphooligosaccharide--protein glycosyltransferase subunit 2 [Anoplophora glabripennis]
c46106.graph_c0	393	527	413	852	1130	1439	41.17	44.61	37.38	67.75	104.8	140.17	0.000117528	1.49135	up	--	--	--	--	--	--	Spaetzle	--	S	Function unknown	uncharacterized protein LOC108905716 [Anoplophora glabripennis]
c53676.graph_c1	586	605	903	1589	2084	1716	5.38	4.49	7.25	10.67	16.57	14.72	2.30436e-05	1.4876	up	[Q]	Secondary metabolites biosynthesis, transport and catabolism	Molecular Function: catalytic activity (GO:0003824);; Biological Process: metabolic process (GO:0008152);;	--	[R]	General function prediction only	AMP-binding enzyme;; DMAP1-binding Domain	Disco-interacting protein 2 OS=Drosophila melanogaster OX=7227 GN=DIP2 PE=1 SV=2	IQ	--	disco-interacting protein 2 isoform X3 [Anoplophora glabripennis]
c47593.graph_c0	572	451	536	1080	1457	1535	53.26	35.65	43.29	73.15	121.27	134.77	0.000148481	1.48431	up	[CI]	Energy production and conversion ;; Lipid transport and metabolism	Molecular Function: heme binding (GO:0020037);; Molecular Function: metal ion binding (GO:0046872);;	--	[C]	Energy production and conversion	Cytochrome b5-like Heme/Steroid binding domain	Cytochrome b5 OS=Musca domestica OX=7370 GN=Cyt-b5 PE=1 SV=1	CI	--	cytochrome b5 [Anoplophora glabripennis]
c52303.graph_c0	160	124	195	352	393	499	4.9	3.09	5.12	8.38	10.97	14.65	0.000308979	1.48347	up	--	--	--	--	--	--	--	--	--	--	uncharacterized protein LOC108916321 isoform X3 [Anoplophora glabripennis]
c57675.graph_c0	640	896	985	2177	2489	1778	9.26	10.55	12.41	24.36	32.91	24.68	1.2373e-06	1.48201	up	--	--	Cellular Component: integral component of membrane (GO:0016021);;	--	--	--	--	--	S	Function unknown	uncharacterized protein LOC108910798 [Anoplophora glabripennis]
c58986.graph_c0	305	513	449	1497	854	903	3.1	4.46	4.13	11.5	7.53	8.32	1.93566e-05	1.47123	up	[V]	Defense mechanisms	--	K05643|0|tca:659344|K05643 ATP-binding cassette, subfamily A (ABC1), member 3 | (RefSeq) ATP-binding cassette sub-family A member 3	[IR]	--	ABC-2 family transporter protein;; ABC transporter;; AAA domain, putative AbiEii toxin, Type IV TA system;; ABC transporter;; AAA domain, putative AbiEii toxin, Type IV TA system	ABC transporter ced-7 OS=Caenorhabditis elegans OX=6239 GN=ced-7 PE=1 SV=6	V	Defense mechanisms	ATP-binding cassette sub-family A member 3-like isoform X1 [Anoplophora glabripennis]
c49516.graph_c1	162	163	172	426	411	443	6.12	4.75	5.16	10.38	12.51	15.41	2.50881e-06	1.47059	up	--	--	--	--	[D]	Cell cycle control, cell division, chromosome partitioning	Electron transfer DM13	Protein Skeletor, isoforms D/E OS=Drosophila melanogaster OX=7227 GN=Skeletor PE=1 SV=3	S	Function unknown	G-protein coupled receptor Mth-like isoform X1 [Anoplophora glabripennis]
c51224.graph_c0	525	539	640	918	1614	1777	17.56	14.58	18.48	23.5	48.84	56.2	0.000685699	1.46732	up	--	--	Molecular Function: zinc ion binding (GO:0008270);; Cellular Component: integral component of membrane (GO:0016021);;	--	[O]	Posttranslational modification, protein turnover, chaperones	Zinc finger, C3HC4 type (RING finger)	RING finger protein B OS=Dictyostelium discoideum OX=44689 GN=rngB PE=2 SV=2	S	Function unknown	cell growth regulator with RING finger domain protein 1 [Anoplophora glabripennis]
c56049.graph_c0	378	448	450	1088	1050	1111	6.21	5.92	6.37	13.66	15.56	17.26	7.45302e-08	1.46501	up	[O]	Posttranslational modification, protein turnover, chaperones	--	--	[E]	Amino acid transport and metabolism	Peptidase family M13;; Peptidase family M13	Protein gone early OS=Drosophila melanogaster OX=7227 GN=goe PE=2 SV=1	O	Posttranslational modification, protein turnover, chaperones	protein gone early [Anoplophora glabripennis]
c58728.graph_c0	1295	1620	1833	4828	5039	2264	19.26	18.91	22.35	49.81	61.67	32.91	0.000380741	1.45715	up	--	--	Cellular Component: membrane (GO:0016020);;	K16681|0|tca:659222|K16681 protein crumbs | (RefSeq) protein crumbs	[T]	Signal transduction mechanisms	EGF-like domain;; Human growth factor-like EGF;; Laminin G domain;; Laminin G domain;; Calcium-binding EGF domain;; EGF-like domain	Protein crumbs OS=Drosophila melanogaster OX=7227 GN=crb PE=1 SV=3	S	Function unknown	protein crumbs [Anoplophora glabripennis]
c57115.graph_c2	143	113	113	444	389	144	4.93	3.29	3.5	11.52	11.8	4.99	0.00827993	1.45179	up	[R]	General function prediction only	--	--	--	--	von Willebrand factor type A domain;; Reverse transcriptase (RNA-dependent DNA polymerase)	--	S	Function unknown	inter-alpha-trypsin inhibitor heavy chain H3-like [Anoplophora glabripennis]
c54530.graph_c0	830	1526	1196	4369	2603	1999	16.39	24.47	20.54	66.48	46.72	37.63	0.000229063	1.44265	up	--	--	--	--	--	--	--	--	S	Function unknown	uncharacterized protein LOC108903195 [Anoplophora glabripennis]
c46188.graph_c1	551	820	802	1618	1603	2146	24.28	29.31	30.78	54.77	63.87	89.67	9.46604e-06	1.44247	up	--	--	Cellular Component: integral component of membrane (GO:0016021);;	--	--	--	PMP-22/EMP/MP20/Claudin tight junction	--	S	Function unknown	uncharacterized protein LOC108905793 [Anoplophora glabripennis]
c59445.graph_c1	430	413	459	1399	1175	762	2.78	2.17	2.64	7.12	7.64	4.72	5.05687e-05	1.44017	up	--	--	Molecular Function: scavenger receptor activity (GO:0005044);; Biological Process: receptor-mediated endocytosis (GO:0006898);; Cellular Component: integral component of membrane (GO:0016021);;	--	--	--	Scavenger receptor cysteine-rich domain;; Scavenger receptor cysteine-rich domain	Protein bark beetle OS=Drosophila melanogaster OX=7227 GN=bark PE=1 SV=1	S	Function unknown	protein bark beetle isoform X1 [Anoplophora glabripennis]
c54635.graph_c1	1048	1144	1437	3711	2796	2647	24.06	21.58	28.68	65.56	58.3	57.89	5.90997e-07	1.43803	up	--	--	Molecular Function: actin binding (GO:0003779);; Cellular Component: cytoplasm (GO:0005737);; Cellular Component: cytoskeleton (GO:0005856);; Cellular Component: extrinsic component of membrane (GO:0019898);;	--	[R]	General function prediction only	Ezrin/radixin/moesin family;; FERM central domain;; FERM C-terminal PH-like domain;; FERM N-terminal domain	Moesin/ezrin/radixin homolog 1 OS=Aedes aegypti OX=7159 GN=Moe PE=3 SV=1	S	Function unknown	moesin/ezrin/radixin homolog 1 [Anoplophora glabripennis]
c58101.graph_c0	267	315	148	693	608	567	4.14	3.93	2.06	8.55	8.84	8.46	0.000924223	1.43799	up	--	--	Molecular Function: metalloendopeptidase activity (GO:0004222);; Biological Process: proteolysis (GO:0006508);; Biological Process: integrin-mediated signaling pathway (GO:0007229);; Molecular Function: zinc ion binding (GO:0008270);;	--	[O]	Posttranslational modification, protein turnover, chaperones	Reprolysin (M12B) family zinc metalloprotease;; Metallo-peptidase family M12;; Metallo-peptidase family M12B Reprolysin-like;; Reprolysin family propeptide;; Metallo-peptidase family M12B Reprolysin-like;; Metallo-peptidase family M12B Reprolysin-like	A disintegrin and metalloproteinase with thrombospondin motifs adt-1 OS=Caenorhabditis elegans OX=6239 GN=adt-1 PE=2 SV=1	S	Function unknown	A disintegrin and metalloproteinase with thrombospondin motifs adt-1-like [Anoplophora glabripennis]
c50743.graph_c0	299	422	302	530	1005	983	13.68	15.66	12.04	18.63	41.54	42.62	0.00129111	1.43671	up	--	--	--	--	--	--	--	--	--	--	uncharacterized protein LOC108907745 [Anoplophora glabripennis]
c57349.graph_c0	745	1057	593	1520	2248	2174	11.42	13.58	7.86	17.82	30.51	32.67	0.000536129	1.43528	up	[O]	Posttranslational modification, protein turnover, chaperones	Cellular Component: cell (GO:0005623);; Molecular Function: electron carrier activity (GO:0009055);; Molecular Function: protein disulfide oxidoreductase activity (GO:0015035);; Biological Process: cell redox homeostasis (GO:0045454);; Biological Process: oxidation-reduction process (GO:0055114);;	K17479|2.26501e-151|tca:658863|K17479 glutaredoxin domain-containing cysteine-rich protein 1 | (RefSeq) glutaredoxin domain-containing cysteine-rich protein CG12206	[O]	Posttranslational modification, protein turnover, chaperones	Glutaredoxin;; SH3-binding, glutamic acid-rich protein	Glutaredoxin domain-containing cysteine-rich protein CG31559 OS=Drosophila melanogaster OX=7227 GN=CG31559 PE=2 SV=2	O	Posttranslational modification, protein turnover, chaperones	glutaredoxin domain-containing cysteine-rich protein CG31559-like [Anoplophora glabripennis]
c58862.graph_c0	1187	1312	1490	2496	3568	3772	11.99	10.77	13.11	19.47	32.87	36.44	6.91793e-05	1.43021	up	--	--	Molecular Function: zinc ion binding (GO:0008270);; Cellular Component: integral component of membrane (GO:0016021);; Molecular Function: ligase activity (GO:0016874);;	K10636|0|tca:661853|K10636 autocrine motility factor receptor [EC:2.3.2.27] | (RefSeq) E3 ubiquitin-protein ligase AMFR	[O]	Posttranslational modification, protein turnover, chaperones	Ring finger domain;; CUE domain;; Zinc finger, C3HC4 type (RING finger);; Zinc finger, C3HC4 type (RING finger);; RING-type zinc-finger;; RING-like zinc finger;; Anaphase-promoting complex subunit 11 RING-H2 finger	E3 ubiquitin-protein ligase hrd-like protein 1 OS=Caenorhabditis elegans OX=6239 GN=hrdl-1 PE=1 SV=2	O	Posttranslational modification, protein turnover, chaperones	E3 ubiquitin-protein ligase AMFR-like isoform X1 [Anoplophora glabripennis]
c53880.graph_c0	454	532	638	995	1795	1199	14.75	13.94	18.11	24.84	52.95	36.88	0.000366182	1.42802	up	[G]	Carbohydrate transport and metabolism	Cellular Component: integral component of membrane (GO:0016021);; Molecular Function: substrate-specific transmembrane transporter activity (GO:0022891);; Biological Process: transmembrane transport (GO:0055085);;	K08145|0|tca:663245|K08145 MFS transporter, SP family, solute carrier family 2 (facilitated glucose transporter), member 8 | (RefSeq) facilitated trehalose transporter Tret1	[R]	General function prediction only	Sugar (and other) transporter;; Major Facilitator Superfamily	Facilitated trehalose transporter Tret1 OS=Bombyx mori OX=7091 GN=Tret1 PE=1 SV=1	G	Carbohydrate transport and metabolism	facilitated trehalose transporter Tret1-like [Anoplophora glabripennis]
c58053.graph_c0	262	248	332	763	745	599	4.04	3.01	4.35	8.79	10.13	8.65	8.23272e-06	1.4254	up	--	--	--	K20121|0|tca:657861|K20121 formin-binding protein 1 | (RefSeq) cdc42-interacting protein 4 homolog	[Z]	Cytoskeleton	Fes/CIP4, and EFC/F-BAR homology domain;; SH3 domain	Transducer of Cdc42-dependent actin assembly protein 1 homolog OS=Caenorhabditis elegans OX=6239 GN=toca-1 PE=1 SV=2	Z	Cytoskeleton	formin-binding protein 1-like isoform X1 [Leptinotarsa decemlineata]
c59187.graph_c0	768	910	1184	2322	2620	2109	12.91	12.42	15.87	31.2	41.93	43.88	3.22782e-06	1.42489	up	[R]	General function prediction only	Molecular Function: GTP binding (GO:0005525);; Cellular Component: intracellular (GO:0005622);; Biological Process: small GTPase mediated signal transduction (GO:0007264);;	K04392|9.59185e-125|tca:656798|K04392 Ras-related C3 botulinum toxin substrate 1 | (RefSeq) Rac1; Ras-related protein Rac1	[R]	General function prediction only	Zinc finger, C2H2 type;; Zinc-finger double domain;; C2H2-type zinc finger;; C2H2-type zinc finger;; Zinc-finger double-stranded RNA-binding;; Ras family;; Ras of Complex, Roc, domain of DAPkinase;; ADP-ribosylation factor family	Ras-related protein Rac1 OS=Drosophila melanogaster OX=7227 GN=Rac1 PE=1 SV=2	S	Function unknown	zinc finger protein 239-like [Anoplophora glabripennis]
c58235.graph_c0	153	214	278	651	728	227	1.76	2	2.8	5.79	7.62	2.5	0.00873057	1.42399	up	[M]	Cell wall/membrane/envelope biogenesis	Molecular Function: protein kinase activity (GO:0004672);; Molecular Function: ATP binding (GO:0005524);; Biological Process: protein phosphorylation (GO:0006468);; Molecular Function: zinc ion binding (GO:0008270);;	K05743|0|tca:657421|K05743 LIM domain kinase 1 [EC:2.7.11.1] | (RefSeq) LIM domain kinase 1	--	--	Protein tyrosine kinase;; Protein kinase domain;; LIM domain;; Lipopolysaccharide kinase (Kdo/WaaP) family	LIM domain kinase 1 OS=Drosophila melanogaster OX=7227 GN=LIMK1 PE=1 SV=1	T	Signal transduction mechanisms	LIM domain kinase 1 isoform X2 [Anoplophora glabripennis]
c48488.graph_c0	1620	1641	1398	2164	3931	5408	48.22	39.67	36.23	49.6	106.17	153.18	0.00449857	1.42357	up	--	--	Cellular Component: endoplasmic reticulum (GO:0005783);; Cellular Component: integral component of membrane (GO:0016021);; Biological Process: phosphorylation (GO:0016310);; Molecular Function: transferase activity (GO:0016740);; Biological Process: organophosphate metabolic process (GO:0019637);; Biological Process: carbohydrate derivative metabolic process (GO:1901135);;	K14010|8.14519e-170|tca:655979|K14010 translocating chain-associated membrane protein 1 | (RefSeq) translocating chain-associated membrane protein 1	[U]	Intracellular trafficking, secretion, and vesicular transport	TLC domain;; TRAM1-like protein	--	U	Intracellular trafficking, secretion, and vesicular transport	translocating chain-associated membrane protein 1 isoform X1 [Anoplophora glabripennis]
c59369.graph_c0	1857	2224	2600	6686	6041	3916	25.48	24.96	32.1	72.96	80.44	50.7	1.18556e-05	1.42251	up	[R]	General function prediction only	Molecular Function: endopeptidase inhibitor activity (GO:0004866);; Cellular Component: extracellular space (GO:0005615);; Biological Process: negative regulation of endopeptidase activity (GO:0010951);; Cellular Component: integral component of membrane (GO:0016021);;	--	[O]	Posttranslational modification, protein turnover, chaperones	A-macroglobulin complement component;; Alpha-2-macroglobulin family;; A-macroglobulin receptor;; Alpha-2-macroglobulin family N-terminal region;; MG2 domain;; Low-density lipoprotein receptor domain class A	--	S	Function unknown	CD109 antigen [Anoplophora glabripennis]
c40468.graph_c0	190	211	204	280	517	677	20.21	18.12	18.89	22.65	48.83	67.16	0.00421737	1.41577	up	--	--	Cellular Component: integral component of membrane (GO:0016021);;	--	--	--	Domain of unknown function (DUF4519)	Single-pass membrane and coiled-coil domain-containing protein 4 homolog OS=Anopheles gambiae OX=7165 GN=AGAP003534 PE=3 SV=3	S	Function unknown	single-pass membrane and coiled-coil domain-containing protein 4 homolog [Anoplophora glabripennis]
c41520.graph_c0	577	692	649	1094	1611	1966	32.84	31.89	32.14	47.71	82.54	105.59	0.000372512	1.41533	up	[IQR]	Lipid transport and metabolism ;; Secondary metabolites biosynthesis, transport and catabolism ;; General function prediction only	Molecular Function: oxidoreductase activity (GO:0016491);; Biological Process: oxidation-reduction process (GO:0055114);;	K00357|2.57641e-110|tca:659558|K00357 dihydropteridine reductase [EC:1.5.1.34] | (RefSeq) dihydropteridine reductase	[E]	Amino acid transport and metabolism	short chain dehydrogenase;; Enoyl-(Acyl carrier protein) reductase	Dihydropteridine reductase OS=Dictyostelium discoideum OX=44689 GN=qdpr PE=1 SV=1	I	Lipid transport and metabolism	dihydropteridine reductase [Anoplophora glabripennis]
c58326.graph_c0	303	275	312	572	831	794	5.55	4.06	5.14	8.17	14.35	13.79	0.00020615	1.41424	up	--	--	--	--	--	--	--	--	--	--	uncharacterized protein LOC108907749 [Anoplophora glabripennis]
c58878.graph_c0	799	932	1492	1477	2635	3618	29.83	35.82	61.26	45.45	107.57	171.94	0.00609579	1.41349	up	[O]	Posttranslational modification, protein turnover, chaperones	Molecular Function: hydrolase activity (GO:0016787);;	--	[E]	Amino acid transport and metabolism	Trypsin	Serine protease snake OS=Drosophila melanogaster OX=7227 GN=snk PE=1 SV=2	O	Posttranslational modification, protein turnover, chaperones	uncharacterized protein LOC108904131 [Anoplophora glabripennis]
c57566.graph_c0	298	372	463	523	1049	1146	5.09	5.15	6.86	6.87	16.27	18.63	0.00308931	1.40993	up	[O]	Posttranslational modification, protein turnover, chaperones	Molecular Function: metalloendopeptidase activity (GO:0004222);; Cellular Component: cell (GO:0005623);; Biological Process: proteolysis (GO:0006508);; Biological Process: cell redox homeostasis (GO:0045454);; Molecular Function: metal ion binding (GO:0046872);;	K09530|0|tca:660466|K09530 DnaJ homolog subfamily C member 10 | (RefSeq) dnaJ homolog subfamily C member 10-like	[O]	Posttranslational modification, protein turnover, chaperones	Thioredoxin;; DnaJ domain;; Thioredoxin-like domain;; OST3 / OST6 family, transporter family;; Thioredoxin-like;; AhpC/TSA family;; Thioredoxin-like domain;; Thioredoxin-like	Thioredoxin domain-containing protein 5 homolog OS=Drosophila melanogaster OX=7227 GN=prtp PE=1 SV=2	O	Posttranslational modification, protein turnover, chaperones	dnaJ homolog subfamily C member 10-like [Anoplophora glabripennis]
c51731.graph_c0	1249	2724	2044	3758	4655	5868	37.63	66.54	53.67	87.26	127.36	168.26	0.000510138	1.40892	up	--	--	--	--	--	--	--	--	S	Function unknown	PREDICTED: uncharacterized protein LOC109536561 isoform X2 [Dendroctonus ponderosae]
c57372.graph_c0	152	139	156	436	364	315	2.11	1.57	1.88	4.66	4.6	4.18	2.18885e-05	1.40731	up	--	--	Biological Process: superoxide metabolic process (GO:0006801);; Molecular Function: metal ion binding (GO:0046872);; Biological Process: oxidation-reduction process (GO:0055114);;	--	[P]	Inorganic ion transport and metabolism	Copper/zinc superoxide dismutase (SODC)	--	S	Function unknown	uncharacterized protein LOC108908397 [Anoplophora glabripennis]
c54178.graph_c0	119	124	237	330	585	249	7.36	6.84	13.83	17.04	34.94	15.36	0.00895748	1.40403	up	[R]	General function prediction only	--	--	--	--	Vault protein inter-alpha-trypsin domain;; Serpin (serine protease inhibitor);; von Willebrand factor type A domain	--	S	Function unknown	inter-alpha-trypsin inhibitor heavy chain H3-like isoform X2 [Anoplophora glabripennis]
c54065.graph_c0	466	620	701	1247	1520	1526	12.27	13.18	16.43	27.19	34.8	37.98	9.78619e-06	1.40027	up	--	--	Molecular Function: kinase activity (GO:0016301);;	K00915|1.35332e-157|tca:661775|K00915 inositol-polyphosphate multikinase [EC:2.7.1.140 2.7.1.151] | (RefSeq) inositol polyphosphate multikinase	[KIT]	--	Inositol polyphosphate kinase	--	S	Function unknown	inositol polyphosphate multikinase isoform X1 [Anoplophora glabripennis]
c58452.graph_c0	460	428	449	1212	1165	932	6.91	5.32	5.85	14.2	15.96	13.52	8.02118e-06	1.39854	up	--	--	--	K16756|3.06995e-104|tca:657193|K16756 coiled-coil domain-containing protein 64 | (RefSeq) bicaudal D-related protein homolog	--	--	--	Bicaudal D-related protein homolog OS=Drosophila melanogaster OX=7227 GN=CG17365 PE=2 SV=1	S	Function unknown	bicaudal D-related protein homolog isoform X1 [Anoplophora glabripennis]
c51457.graph_c0	2205	3143	3016	5921	7794	6362	64.56	74.74	76.88	133.52	207.07	177.28	5.24683e-06	1.39796	up	[O]	Posttranslational modification, protein turnover, chaperones	Molecular Function: hydrolase activity (GO:0016787);;	--	[E]	Amino acid transport and metabolism	Trypsin	Serine protease snake OS=Drosophila melanogaster OX=7227 GN=snk PE=1 SV=2	O	Posttranslational modification, protein turnover, chaperones	serine protease persephone [Anoplophora glabripennis]
c54874.graph_c0	2528	4016	4283	9170	9089	7474	55.42	71.53	81.75	155.01	181.19	156.25	2.01028e-06	1.3829	up	--	--	--	K03103|7.87036e-169|tca:661691|K03103 multiple inositol-polyphosphate phosphatase / 2,3-bisphosphoglycerate 3-phosphatase [EC:3.1.3.62 3.1.3.80] | (RefSeq) multiple inositol polyphosphate phosphatase 1	[R]	General function prediction only	Histidine phosphatase superfamily (branch 2)	Multiple inositol polyphosphate phosphatase 1 OS=Drosophila melanogaster OX=7227 GN=Mipp1 PE=1 SV=2	S	Function unknown	multiple inositol polyphosphate phosphatase 1-like [Anoplophora glabripennis]
c47701.graph_c1	1420	1841	1218	2320	3609	4743	116.56	120.98	86.74	143.84	261.14	358.18	0.00253643	1.38141	up	--	--	--	--	--	--	--	--	--	--	uncharacterized protein LOC108914877 [Anoplophora glabripennis]
c49489.graph_c1	163	189	232	502	529	374	2.14	1.97	2.57	4.83	6.08	4.74	2.74724e-05	1.3806	up	--	--	Molecular Function: calcium ion binding (GO:0005509);; Biological Process: Notch signaling pathway (GO:0007219);; Biological Process: multicellular organism development (GO:0007275);; Cellular Component: integral component of membrane (GO:0016021);;	K06051|0|tca:658619|K06051 delta | (RefSeq) neurogenic locus protein delta	[T]	Signal transduction mechanisms	EGF-like domain;; Human growth factor-like EGF;; N terminus of Notch ligand;; Delta serrate ligand;; EGF-like domain;; Calcium-binding EGF domain	Neurogenic locus protein delta OS=Drosophila melanogaster OX=7227 GN=Dl PE=1 SV=2	U	Intracellular trafficking, secretion, and vesicular transport	neurogenic locus protein delta [Anoplophora glabripennis]
c58299.graph_c0	2025	2859	2388	7361	5583	4601	17.27	19.82	17.74	48.5	43.45	37.55	2.69734e-06	1.37691	up	[T]	Signal transduction mechanisms	Molecular Function: protein tyrosine phosphatase activity (GO:0004725);; Cellular Component: integral component of membrane (GO:0016021);; Biological Process: peptidyl-tyrosine dephosphorylation (GO:0035335);;	K05694|0|tca:663785|K05694 receptor-type tyrosine-protein phosphatase beta [EC:3.1.3.48] | (RefSeq) tyrosine-protein phosphatase 10D	[T]	Signal transduction mechanisms	Fibronectin type III domain;; Protein-tyrosine phosphatase;; Interferon-alpha/beta receptor, fibronectin type III;; Uncharacterised conserved protein (DUF2369)	Tyrosine-protein phosphatase 10D OS=Drosophila melanogaster OX=7227 GN=Ptp10D PE=1 SV=4	T	Signal transduction mechanisms	tyrosine-protein phosphatase 10D [Anoplophora glabripennis]
c48951.graph_c0	209	316	413	550	782	846	42.46	51.04	73.51	82.58	134.65	155.42	0.000855617	1.36833	up	--	--	--	--	--	--	--	--	--	--	hypothetical protein TcasGA2_TC031770 [Tribolium castaneum]
c55512.graph_c1	437	491	652	1059	963	1705	13.36	12.84	17.16	24.58	27.3	54.72	0.000933427	1.36765	up	[G]	Carbohydrate transport and metabolism	--	K07299|0|tca:103312341|K07299 MFS transporter, SP family, solute carrier family 2 (facilitated glucose transporter), member 1 | (RefSeq) glucose transporter type 1	[G]	Carbohydrate transport and metabolism	Sugar (and other) transporter;; Major Facilitator Superfamily	Glucose transporter type 1 OS=Drosophila melanogaster OX=7227 GN=Glut1 PE=2 SV=4	G	Carbohydrate transport and metabolism	PREDICTED: glucose transporter type 1 isoform X6 [Aethina tumida]
c58915.graph_c0	628	673	1016	1849	1976	1672	7.8	6.5	10.28	14.67	16.95	18.11	3.29104e-05	1.36692	up	[T]	Signal transduction mechanisms	Molecular Function: hydrolase activity (GO:0016787);;	--	[T]	Signal transduction mechanisms	Protein-tyrosine phosphatase;; Fibronectin type III domain	Tyrosine-protein phosphatase 10D OS=Drosophila melanogaster OX=7227 GN=Ptp10D PE=1 SV=4	T	Signal transduction mechanisms	phosphatidylinositol phosphatase PTPRQ isoform X2 [Anoplophora glabripennis]
c56304.graph_c0	413	488	639	1330	1215	1105	5.56	5.34	7.5	13.84	14.92	14.25	3.20729e-06	1.36338	up	--	--	--	--	[S]	Function unknown	PDZ domain (Also known as DHR or GLGF);; PDZ domain	Disks large homolog 1 OS=Caenorhabditis elegans OX=6239 GN=dlg-1 PE=1 SV=1	S	Function unknown	uncharacterized protein LOC108911001 [Anoplophora glabripennis]
c50352.graph_c0	4469	3286	6526	8344	12155	13197	122.02	72.86	155.1	175.51	301.34	343.13	0.00310698	1.35592	up	[S]	Function unknown	Molecular Function: binding (GO:0005488);; Molecular Function: hydrolase activity (GO:0016787);;	K19970|0|tca:663694|K19970 5'-nucleotidase [EC:3.1.3.5] | (RefSeq) protein 5NUC	[F]	Nucleotide transport and metabolism	5'-nucleotidase, C-terminal domain;; Calcineurin-like phosphoesterase	Protein 5NUC OS=Lutzomyia longipalpis OX=7200 GN=5NUC PE=1 SV=1	F	Nucleotide transport and metabolism	protein 5NUC [Anoplophora glabripennis]
c51777.graph_c0	3839	4278	5621	6992	12744	12164	109.89	103	144.36	160.13	327.98	339.89	0.00142121	1.35371	up	[O]	Posttranslational modification, protein turnover, chaperones	--	--	[V]	Defense mechanisms	Serpin (serine protease inhibitor)	Serine protease inhibitor 27A OS=Drosophila melanogaster OX=7227 GN=Spn27A PE=1 SV=1	O	Posttranslational modification, protein turnover, chaperones	serine protease inhibitor 27A-like isoform X2 [Anoplophora glabripennis]
c57285.graph_c0	514	379	691	922	1760	1067	56.07	26.6	56.41	55.54	191.96	125.76	0.00547188	1.35337	up	--	--	Molecular Function: binding (GO:0005488);;	--	[R]	General function prediction only	--	--	S	Function unknown	putative RNA-directed DNA polymerase from transposon BS-like Protein [Tribolium castaneum]
c59100.graph_c0	850	832	993	3118	2092	1277	12.23	10.38	11.77	50.17	39.03	25.6	0.00107152	1.35077	up	--	--	--	--	--	--	--	--	S	Function unknown	uncharacterized protein LOC108915033 [Anoplophora glabripennis]
c57866.graph_c0	155	189	310	444	553	514	4.64	5.36	8.03	11.41	17.86	16.69	0.000710343	1.34626	up	--	--	Biological Process: protein dephosphorylation (GO:0006470);; Molecular Function: protein tyrosine/serine/threonine phosphatase activity (GO:0008138);;	K14165|3.0171e-85|tca:659125|K14165 atypical dual specificity phosphatase [EC:3.1.3.16 3.1.3.48] | (RefSeq) dual specificity protein phosphatase 14	[V]	Defense mechanisms	Dual specificity phosphatase, catalytic domain	Tyrosine-protein phosphatase vhp-1 OS=Caenorhabditis elegans OX=6239 GN=vhp-1 PE=1 SV=2	T	Signal transduction mechanisms	dual specificity protein phosphatase 18-like [Anoplophora glabripennis]
c43075.graph_c0	5266	6527	8967	12006	16257	19511	403.19	404.26	596.4	702.31	1114.35	1403.32	0.000626555	1.34606	up	--	--	Molecular Function: lysozyme activity (GO:0003796);; Cellular Component: extracellular space (GO:0005615);; Biological Process: multicellular organism reproduction (GO:0032504);;	--	--	--	Destabilase	Lysozyme OS=Meretrix lusoria OX=74491 PE=1 SV=1	S	Function unknown	lysozyme [Anoplophora glabripennis]
c50514.graph_c0	199	312	218	440	630	614	8.09	10.51	7.71	13.86	24.1	23.88	0.00044991	1.34553	up	[O]	Posttranslational modification, protein turnover, chaperones	Molecular Function: hydrolase activity (GO:0016787);;	--	[E]	Amino acid transport and metabolism	Trypsin;; Regulatory CLIP domain of proteinases	Serine protease snake OS=Drosophila melanogaster OX=7227 GN=snk PE=1 SV=2	O	Posttranslational modification, protein turnover, chaperones	serine protease snake-like [Anoplophora glabripennis]
c53506.graph_c0	197	276	328	689	748	701	7.86	9	11.42	21.32	27.24	26.53	4.93476e-07	1.54987	up	--	--	--	--	--	--	--	--	--	--	uncharacterized protein LOC108907749 [Anoplophora glabripennis]
c57538.graph_c1	340	378	406	1281	1125	665	6.17	5.43	6.09	11.77	11.64	7.88	1.55326e-05	1.54241	up	--	--	Molecular Function: guanyl-nucleotide exchange factor activity (GO:0005085);; Cellular Component: intracellular (GO:0005622);; Biological Process: small GTPase mediated signal transduction (GO:0007264);; Biological Process: positive regulation of GTPase activity (GO:0043547);;	K13708|0|tca:661070|K13708 dedicator of cytokinesis protein 1 | (RefSeq) dedicator of cytokinesis protein 1	[T]	Signal transduction mechanisms	DOCK N-terminus;; Dock homology region 2;; C2 domain in Dock180 and Zizimin proteins;; Variant SH3 domain;; SH3 domain	--	S	Function unknown	dedicator of cytokinesis protein 1 isoform X1 [Anoplophora glabripennis]
c58777.graph_c0	120	245	313	746	682	370	1.8	2.97	3.97	8.32	8.98	5.28	0.000849772	1.53899	up	--	--	Biological Process: lipid transport (GO:0006869);;	K20463|0|tca:661896|K20463 oxysterol-binding protein-related protein 3/6/7 | (RefSeq) OSBPL6; oxysterol-binding protein-related protein 6	[I]	Lipid transport and metabolism	Oxysterol-binding protein	Oxysterol-binding protein 8 OS=Dictyostelium discoideum OX=44689 GN=osbH PE=1 SV=1	S	Function unknown	oxysterol-binding protein-related protein 3 isoform X1 [Anoplophora glabripennis]
c43949.graph_c0	441	525	498	1257	1183	1445	22.65	21.82	22.21	49.48	54.7	70.1	1.89887e-07	1.52502	up	--	--	--	--	--	--	--	--	S	Function unknown	uncharacterized protein LOC108917234 [Anoplophora glabripennis]
c51033.graph_c0	616	507	705	988	2175	1118	22.28	14.92	22.29	27.51	71.58	38.79	0.00740911	1.33696	up	--	--	Molecular Function: GTPase activity (GO:0003924);; Molecular Function: structural constituent of cytoskeleton (GO:0005200);; Molecular Function: GTP binding (GO:0005525);; Cellular Component: cytoplasm (GO:0005737);; Cellular Component: microtubule (GO:0005874);; Biological Process: microtubule-based process (GO:0007017);;	K07375|0|tca:655694|K07375 tubulin beta | (RefSeq) tubulin beta chain	[Z]	Cytoskeleton	Tubulin/FtsZ family, GTPase domain;; Tubulin C-terminal domain	Tubulin beta-3 chain OS=Drosophila melanogaster OX=7227 GN=betaTub60D PE=2 SV=2	Z	Cytoskeleton	tubulin beta chain [Anoplophora glabripennis]
c59416.graph_c0	263	483	744	1336	1036	1038	1.92	2.88	4.74	7.52	6.88	7.19	0.00163455	1.33617	up	[M]	Cell wall/membrane/envelope biogenesis	Cellular Component: integral component of membrane (GO:0016021);;	--	--	--	Fibronectin type III domain;; DB module;; Immunoglobulin domain;; Immunoglobulin I-set domain;; Immunoglobulin domain;; Immunoglobulin domain;; Immunoglobulin V-set domain;; Tissue factor;; Interferon-alpha/beta receptor, fibronectin type III	Ig-like and fibronectin type-III domain-containing protein 2 OS=Caenorhabditis elegans OX=6239 GN=igdb-2 PE=1 SV=4	S	Function unknown	Ig-like and fibronectin type-III domain-containing protein 1 isoform X2 [Anoplophora glabripennis]
c48860.graph_c0	104	206	164	318	405	354	6.86	11	9.4	16.05	23.99	22	0.000364556	1.33267	up	--	--	--	--	--	--	--	--	S	Function unknown	apolipoprotein D [Anoplophora glabripennis]
c58966.graph_c0	503	514	687	1164	1561	1219	6.58	5.83	7.31	10.76	18.22	16.18	0.000118522	1.33057	up	--	--	Molecular Function: metalloendopeptidase activity (GO:0004222);; Biological Process: membrane protein ectodomain proteolysis (GO:0006509);; Biological Process: Notch signaling pathway (GO:0007219);; Molecular Function: zinc ion binding (GO:0008270);; Cellular Component: integral component of membrane (GO:0016021);;	K06704|0|tca:659820|K06704 disintegrin and metalloproteinase domain-containing protein 10 [EC:3.4.24.81] | (RefSeq) disintegrin and metalloproteinase domain-containing protein 10	[W]	Extracellular structures	Metallo-peptidase family M12B Reprolysin-like;; Metallo-peptidase family M12;; Metallo-peptidase family M12B Reprolysin-like;; Disintegrin;; Reprolysin family propeptide;; Metallo-peptidase family M12B Reprolysin-like;; Reprolysin (M12B) family zinc metalloprotease	Disintegrin and metalloproteinase domain-containing protein 10 homolog OS=Caenorhabditis elegans OX=6239 GN=sup-17 PE=1 SV=1	O	Posttranslational modification, protein turnover, chaperones	disintegrin and metalloproteinase domain-containing protein 10 isoform X3 [Anoplophora glabripennis]
c59193.graph_c1	242	280	324	437	868	633	3.36	4.54	4.13	6.37	12.52	7.74	0.00223905	1.32962	up	[O]	Posttranslational modification, protein turnover, chaperones	--	--	--	--	Serpin (serine protease inhibitor);; von Willebrand factor type A domain;; Vault protein inter-alpha-trypsin domain;; von Willebrand factor type A domain	Serine protease inhibitor 3/4 (Fragment) OS=Lonomia obliqua OX=304329 PE=1 SV=1	S	Function unknown	inter-alpha-trypsin inhibitor heavy chain H3-like isoform X1 [Anoplophora glabripennis]
c54090.graph_c0	1916	1376	1777	4182	3514	4339	62.29	41.17	53.35	93.74	91.75	118.46	0.000300919	1.32846	up	[Q]	Secondary metabolites biosynthesis, transport and catabolism	Cellular Component: integral component of membrane (GO:0016021);; Biological Process: oxidation-reduction process (GO:0055114);; Molecular Function: fatty-acyl-CoA reductase (alcohol-forming) activity (GO:0080019);;	K13356|4.01717e-179|tca:655283|K13356 alcohol-forming fatty acyl-CoA reductase [EC:1.2.1.84] | (RefSeq) putative fatty acyl-CoA reductase CG5065	[I]	Lipid transport and metabolism	Male sterility protein;; NAD dependent epimerase/dehydratase family;; Male sterility protein	Fatty acyl-CoA reductase wat OS=Drosophila melanogaster OX=7227 GN=wat PE=1 SV=1	S	Function unknown	PREDICTED: putative fatty acyl-CoA reductase CG5065 [Tribolium castaneum]
c56576.graph_c1	4979	9519	4067	10325	17831	14094	168.33	307.77	121.95	316.65	733.59	426.38	0.00678464	1.32779	up	--	--	Molecular Function: catechol oxidase activity (GO:0004097);; Molecular Function: monophenol monooxygenase activity (GO:0004503);; Molecular Function: metal ion binding (GO:0046872);; Biological Process: oxidation-reduction process (GO:0055114);;	--	--	--	Hemocyanin, ig-like domain;; Hemocyanin, copper containing domain;; Common central domain of tyrosinase	Phenoloxidase 1 OS=Holotrichia diomphalia OX=33394 GN=PPO1 PE=1 SV=1	S	Function unknown	uncharacterized protein LOC108904736 [Anoplophora glabripennis]
c58208.graph_c1	5849	7426	8800	13221	21006	15884	185.27	190.07	240.81	328.86	619.26	491.1	0.000286144	1.31981	up	[O]	Posttranslational modification, protein turnover, chaperones	--	--	[V]	Defense mechanisms	Serpin (serine protease inhibitor);; Serpin (serine protease inhibitor)	Alaserpin OS=Manduca sexta OX=7130 PE=1 SV=1	O	Posttranslational modification, protein turnover, chaperones	antichymotrypsin-2-like [Anoplophora glabripennis]
c50300.graph_c0	2390	3678	3454	6594	8461	6484	61.79	77.24	77.72	131.36	198.68	159.68	2.45045e-05	1.31496	up	--	--	--	K19558|3.93564e-69|tca:660885|K19558 neuroblastoma suppressor of tumorigenicity 1 | (RefSeq) DAN, Nbl1; neuroblastoma, suppression of tumorigenicity 1	--	--	DAN domain	--	O	Posttranslational modification, protein turnover, chaperones	uncharacterized protein LOC108915226 [Anoplophora glabripennis]
c46410.graph_c0	100	161	109	439	179	247	10.23	13.3	9.68	34.18	16.28	23.58	0.00454031	1.31487	up	--	--	--	--	--	--	--	--	U	Intracellular trafficking, secretion, and vesicular transport	uncharacterized protein LOC108903653 [Anoplophora glabripennis]
c50539.graph_c0	789	915	887	1056	2333	2472	17.94	17.9	18.23	18.47	47.28	52.44	0.00768847	1.31433	up	--	--	Biological Process: transport (GO:0006810);; Cellular Component: integral component of membrane (GO:0016021);;	--	[I]	Lipid transport and metabolism	CRAL/TRIO domain;; Golgi-dynamics membrane-trafficking;; CRAL/TRIO, N-terminal domain;; Divergent CRAL/TRIO domain;; Eukaryotic protein of unknown function (DUF953)	Retinal-binding protein OS=Todarodes pacificus OX=6637 PE=1 SV=2	S	Function unknown	SEC14-like protein 2 [Anoplophora glabripennis]
c56070.graph_c0	178	268	178	502	457	468	2.78	3.26	2.4	5.99	6.23	7.01	5.48375e-05	1.31188	up	--	--	Molecular Function: zinc ion binding (GO:0008270);;	K04511|0|tca:661337|K04511 prickle | (RefSeq) protein prickle-like	[TZR]	--	PET Domain;; LIM domain	Protein prickle OS=Anopheles gambiae OX=7165 GN=pk PE=3 SV=4	S	Function unknown	protein prickle-like [Leptinotarsa decemlineata]
c48047.graph_c0	167	270	288	478	488	657	15.86	20.71	23.74	34.57	41.27	58.31	0.000385474	1.30849	up	--	--	--	--	--	--	WAP-type (Whey Acidic Protein) 'four-disulfide core'	--	S	Function unknown	uncharacterized protein LOC108905715 [Anoplophora glabripennis]
c57478.graph_c1	179	287	297	491	706	512	11.81	16.56	16.66	30.51	48.14	38.98	0.000388513	1.3068	up	[R]	General function prediction only	Molecular Function: NAD+ synthase (glutamine-hydrolyzing) activity (GO:0003952);; Molecular Function: ATP binding (GO:0005524);; Biological Process: NAD biosynthetic process (GO:0009435);; Molecular Function: hydrolase activity, acting on carbon-nitrogen (but not peptide) bonds (GO:0016810);;	K01950|0|tca:663765|K01950 NAD+ synthase (glutamine-hydrolysing) [EC:6.3.5.1] | (RefSeq) probable glutamine-dependent NAD(+) synthetase	[HR]	--	Carbon-nitrogen hydrolase;; NAD synthase	Probable glutamine-dependent NAD(+) synthetase OS=Drosophila melanogaster OX=7227 GN=CG9940 PE=1 SV=1	S	Function unknown	probable glutamine-dependent NAD(+) synthetase [Anoplophora glabripennis]
c51254.graph_c0	2609	3136	3157	6408	7111	6701	80.66	78.74	84.95	152.54	199.43	197.09	1.81121e-06	1.30477	up	--	--	Cellular Component: plasma membrane (GO:0005886);; Cellular Component: gap junction (GO:0005921);; Biological Process: ion transport (GO:0006811);; Cellular Component: integral component of membrane (GO:0016021);;	--	--	--	Innexin	Innexin inx3 OS=Drosophila melanogaster OX=7227 GN=Inx3 PE=1 SV=1	S	Function unknown	innexin inx3 [Anoplophora glabripennis]
c56892.graph_c0	2148	2890	2831	6138	6761	4923	31.17	34.24	35.64	68.41	89.29	67.96	5.63928e-06	1.30144	up	--	--	Cellular Component: integral component of membrane (GO:0016021);;	--	--	--	--	--	S	Function unknown	uncharacterized protein LOC108917894 [Anoplophora glabripennis]
c56482.graph_c0	267	225	265	479	637	618	8.36	6.2	6.79	10.83	19.41	18.44	0.000666362	1.2998	up	[H]	Coenzyme transport and metabolism	Biological Process: biosynthetic process (GO:0009058);;	K01930|5.22525e-125|tca:663414|K01930 folylpolyglutamate synthase [EC:6.3.2.17] | (RefSeq) folylpolyglutamate synthase, mitochondrial	[H]	Coenzyme transport and metabolism	--	Putative folylpolyglutamate synthase OS=Caenorhabditis elegans OX=6239 GN=F25B5.6 PE=3 SV=1	H	Coenzyme transport and metabolism	folylpolyglutamate synthase, mitochondrial-like isoform X1 [Anoplophora glabripennis]
c57821.graph_c0	845	1114	1033	2353	2503	1918	10.04	10.79	10.7	21.64	27.12	21.86	3.57797e-06	1.2976	up	[G]	Carbohydrate transport and metabolism	--	--	[G]	Carbohydrate transport and metabolism	Glycosyl hydrolases family 18;; Trypsin;; Sushi repeat (SCR repeat)	Endochitinase OS=Manduca sexta OX=7130 PE=2 SV=1	O	Posttranslational modification, protein turnover, chaperones	uncharacterized protein LOC108913103 [Anoplophora glabripennis]
c48889.graph_c0	267	235	339	405	612	875	19.2	13.68	21.18	22.27	39.47	59.26	0.00828577	1.29465	up	--	--	Molecular Function: binding (GO:0005488);; Cellular Component: nucleus (GO:0005634);;	K11656|1.33555e-28|tca:658814|K11656 chromatin accessibility complex protein 1 | (RefSeq) chromatin accessibility complex protein 1	[K]	Transcription	Histone-like transcription factor (CBF/NF-Y) and archaeal histone	--	K	Transcription	chromatin accessibility complex protein 1 [Anoplophora glabripennis]
c50861.graph_c0	354	469	534	852	915	1258	14.95	16.02	19.57	27.58	34.88	50.27	0.00034959	1.29439	up	--	--	Cellular Component: integral component of membrane (GO:0016021);;	--	[S]	Function unknown	Lipoma HMGIC fusion partner-like protein	--	U	Intracellular trafficking, secretion, and vesicular transport	LHFPL tetraspan subfamily member 3 protein [Anoplophora glabripennis]
c55901.graph_c2	462	871	1094	1576	1378	2374	11.75	17.96	23.96	32.83	31.99	58.77	0.00420507	1.29319	up	[E]	Amino acid transport and metabolism	--	--	[E]	Amino acid transport and metabolism	--	Enolase-phosphatase E1 OS=Drosophila simulans OX=7240 GN=GD19634 PE=3 SV=1	S	Function unknown	uncharacterized protein LOC108905306 [Anoplophora glabripennis]
c58275.graph_c0	730	858	968	2022	2392	1377	15.68	14.27	17.21	28.57	38.71	25.72	0.00022828	1.29271	up	[J]	Translation, ribosomal structure and biogenesis	Cellular Component: integral component of membrane (GO:0016021);; Molecular Function: hydrolase activity (GO:0016787);; Molecular Function: carbon-nitrogen ligase activity, with glutamine as amido-N-donor (GO:0016884);;	K19176|0|tca:656783|K19176 fatty acid amide hydrolase 2 [EC:3.5.1.99] | (RefSeq) fatty-acid amide hydrolase 2	[JIT]	--	Amidase;; Cytochrome b5-like Heme/Steroid binding domain	Fatty acid amide hydrolase 1 OS=Caenorhabditis elegans OX=6239 GN=faah-1 PE=2 SV=1	J	Translation, ribosomal structure and biogenesis	fatty-acid amide hydrolase 2 [Anoplophora glabripennis]
c57574.graph_c0	1153	1867	1499	4448	2822	2951	13.85	18.01	15.34	39.68	29.48	32.62	3.8575e-05	1.29022	up	--	--	--	--	--	--	SAM domain (Sterile alpha motif);; SAM domain (Sterile alpha motif)	--	S	Function unknown	uncharacterized protein LOC108912850 isoform X4 [Anoplophora glabripennis]
c54739.graph_c0	316	242	358	914	677	535	7.46	4.65	7.35	16.6	14.51	12.04	0.000891603	1.28951	up	--	--	Molecular Function: transferase activity (GO:0016740);;	--	--	--	Ecdysteroid kinase;; Protein of unknown function (DUF1679);; Phosphotransferase enzyme family	--	S	Function unknown	uncharacterized protein LOC108914917 [Anoplophora glabripennis]
c59455.graph_c0	138	273	230	376	378	645	4.68	7.1	6.46	7.72	10.09	18.56	0.0045646	1.28245	up	--	--	--	--	--	--	--	--	--	--	uncharacterized protein LOC108912846 [Anoplophora glabripennis]
c59032.graph_c1	320	349	345	666	1002	610	4.59	4.6	4.15	8.71	13.26	10.55	0.000775767	1.28075	up	--	--	Molecular Function: Rho guanyl-nucleotide exchange factor activity (GO:0005089);; Cellular Component: intracellular (GO:0005622);; Biological Process: regulation of Rho protein signal transduction (GO:0035023);; Biological Process: positive regulation of GTPase activity (GO:0043547);; Molecular Function: metal ion binding (GO:0046872);;	K21066|0|tca:656196|K21066 A-kinase anchor protein 18 | (RefSeq) rho guanine nucleotide exchange factor 18	[T]	Signal transduction mechanisms	RhoGEF domain	--	T	Signal transduction mechanisms	rho guanine nucleotide exchange factor 18 isoform X3 [Anoplophora glabripennis]
c49840.graph_c0	22947	42946	27933	40892	89984	73202	859.88	1305.87	910.69	1178.46	3052.8	2604.86	0.00845448	1.27838	up	--	--	Molecular Function: structural constituent of cuticle (GO:0042302);;	--	--	--	Insect cuticle protein	Endocuticle structural glycoprotein SgAbd-4 OS=Schistocerca gregaria OX=7010 PE=1 SV=1	S	Function unknown	endocuticle structural glycoprotein SgAbd-4-like [Anoplophora glabripennis]
c59304.graph_c0	3540	3522	4017	8985	9804	6169	45.01	36.57	45.32	94.42	121.99	77.26	0.000155899	1.27071	up	--	--	Molecular Function: motor activity (GO:0003774);; Molecular Function: actin binding (GO:0003779);; Molecular Function: ATP binding (GO:0005524);; Cellular Component: myosin complex (GO:0016459);;	K10352|0|tca:663025|K10352 myosin heavy chain | (RefSeq) Mhc2; myosin heavy chain 2	[Z]	Cytoskeleton	Myosin tail;; Myosin tail	Myosin heavy chain, non-muscle OS=Drosophila melanogaster OX=7227 GN=zip PE=1 SV=2	Z	Cytoskeleton	myosin heavy chain, non-muscle [Anoplophora glabripennis]
c38636.graph_c0	898	1289	1233	2523	2469	2543	28.8	33.53	34.38	62.23	71.75	77.48	1.80817e-06	1.26949	up	--	--	Cellular Component: integral component of membrane (GO:0016021);;	--	--	--	PMP-22/EMP/MP20/Claudin tight junction;; PMP-22/EMP/MP20/Claudin family	--	S	Function unknown	uncharacterized protein LOC108905792 [Anoplophora glabripennis]
c59292.graph_c0	134	204	229	448	395	402	1.36	1.75	2.41	5.18	4.04	4.55	5.22407e-05	1.26576	up	[D]	Cell cycle control, cell division, chromosome partitioning	--	--	[R]	General function prediction only	Ankyrin repeats (3 copies);; Ankyrin repeat;; Ankyrin repeats (many copies);; Ankyrin repeat;; Ankyrin repeats (many copies);; NACHT domain	Ankyrin repeat, PH and SEC7 domain containing protein secG OS=Dictyostelium discoideum OX=44689 GN=secG PE=2 SV=1	S	Function unknown	uncharacterized protein LOC108905886 [Anoplophora glabripennis]
c58296.graph_c0	310	518	464	816	1122	873	4.72	6.58	6.39	9.83	15.64	13.39	0.000265118	1.26497	up	--	--	--	--	[S]	Function unknown	zinc-finger of a C2HC-type	Zinc finger C2HC domain-containing protein CBG14627 OS=Caenorhabditis briggsae OX=6238 GN=CBG14627 PE=3 SV=2	S	Function unknown	uncharacterized protein LOC111515691 [Leptinotarsa decemlineata]
c51895.graph_c0	445	450	618	820	1094	1409	14.14	11.58	17.05	20.01	31.45	42.49	0.00229395	1.26483	up	--	--	Cellular Component: Golgi membrane (GO:0000139);; Molecular Function: sugar:proton symporter activity (GO:0005351);; Biological Process: carbohydrate transport (GO:0008643);; Biological Process: proton transport (GO:0015992);; Cellular Component: integral component of membrane (GO:0016021);;	K15272|1.30545e-178|tca:660810|K15272 solute carrier family 35 (UDP-sugar transporter), member A1/2/3 | (RefSeq) UDP-galactose translocator	[G]	Carbohydrate transport and metabolism	Nucleotide-sugar transporter;; EamA-like transporter family;; UAA transporter family	UDP-galactose/UDP-N-acetylglucosamine transporter srf-3 OS=Caenorhabditis elegans OX=6239 GN=srf-3 PE=1 SV=5	EG	--	UDP-N-acetylglucosamine transporter isoform X1 [Anoplophora glabripennis]
c58582.graph_c0	205	292	291	552	677	501	11.15	8.49	9.21	14.83	15.32	12.46	9.23186e-05	1.26465	up	--	--	--	--	--	--	--	--	S	Function unknown	uncharacterized protein LOC108905594 [Anoplophora glabripennis]
c55253.graph_c0	658	812	833	1287	1773	1967	15.98	16.18	17.77	24.57	40.18	46.15	0.000488176	1.26008	up	[O]	Posttranslational modification, protein turnover, chaperones	Molecular Function: protein disulfide isomerase activity (GO:0003756);; Cellular Component: endoplasmic reticulum (GO:0005783);; Biological Process: protein folding (GO:0006457);; Biological Process: response to endoplasmic reticulum stress (GO:0034976);; Biological Process: cell redox homeostasis (GO:0045454);;	K09583|0|tca:659551|K09583 protein disulfide isomerase family A, member 5 [EC:5.3.4.1] | (RefSeq) protein disulfide-isomerase A5	[O]	Posttranslational modification, protein turnover, chaperones	Thioredoxin;; Thioredoxin-like domain;; OST3 / OST6 family, transporter family;; Thioredoxin-like;; AhpC/TSA family;; Thioredoxin-like;; Redoxin;; Thioredoxin-like domain;; Glutaredoxin;; Thioredoxin;; Calsequestrin;; Thioredoxin;; Thioredoxin-like domain;; AhpC/TSA family	Thioredoxin domain-containing protein 5 homolog OS=Drosophila melanogaster OX=7227 GN=prtp PE=1 SV=2	O	Posttranslational modification, protein turnover, chaperones	protein disulfide-isomerase A5 [Anoplophora glabripennis]
c53149.graph_c1	379	650	493	1376	1037	935	5.52	8.43	5.92	14.64	12.59	12.37	6.3236e-05	1.25691	up	[V]	Defense mechanisms	Molecular Function: ATP binding (GO:0005524);; Cellular Component: integral component of membrane (GO:0016021);; Molecular Function: ATPase activity, coupled to transmembrane movement of substances (GO:0042626);; Biological Process: transmembrane transport (GO:0055085);;	K05673|0|tca:661269|K05673 ATP-binding cassette, subfamily C (CFTR/MRP), member 4 | (RefSeq) probable multidrug resistance-associated protein lethal(2)03659	[Q]	Secondary metabolites biosynthesis, transport and catabolism	ABC transporter transmembrane region;; ABC transporter;; AAA domain, putative AbiEii toxin, Type IV TA system;; 50S ribosome-binding GTPase;; AAA domain	Probable multidrug resistance-associated protein lethal(2)03659 OS=Drosophila melanogaster OX=7227 GN=l(2)03659 PE=2 SV=4	V	Defense mechanisms	probable multidrug resistance-associated protein lethal(2)03659 [Anoplophora glabripennis]
c52077.graph_c0	13084	19049	15274	37823	36238	29835	335.76	396.99	341	747.67	843.57	729.36	4.84877e-06	1.25137	up	[GM]	Carbohydrate transport and metabolism ;; Cell wall/membrane/envelope biogenesis	Molecular Function: chitin deacetylase activity (GO:0004099);; Molecular Function: chitinase activity (GO:0004568);; Cellular Component: extracellular region (GO:0005576);; Biological Process: carbohydrate metabolic process (GO:0005975);; Biological Process: chitin catabolic process (GO:0006032);; Molecular Function: chitin binding (GO:0008061);;	--	--	--	Polysaccharide deacetylase	--	S	Function unknown	uncharacterized protein LOC108904406 [Anoplophora glabripennis]
c53475.graph_c0	341	345	323	642	698	885	12.67	10.4	10.43	18.32	23.44	31.2	0.000566963	1.25095	up	--	--	Cellular Component: integral component of membrane (GO:0016021);;	K17352|2.76998e-111|tca:664198|K17352 tetraspanin-11 | (RefSeq) CD151 antigen	[R]	General function prediction only	Tetraspanin family	23 kDa integral membrane protein OS=Schistosoma japonicum OX=6182 PE=2 SV=1	S	Function unknown	CD151 antigen [Anoplophora glabripennis]
c58872.graph_c0	124	133	236	353	476	248	5.97	5.47	12.68	11.29	39.4	14.03	0.00838235	1.24936	up	--	--	--	K16172|0|tca:103313904|K16172 insulin receptor substrate 1 | (RefSeq) insulin receptor substrate 1	--	--	PTB domain (IRS-1 type);; PH domain	Insulin receptor substrate 1 OS=Drosophila melanogaster OX=7227 GN=chico PE=1 SV=1	T	Signal transduction mechanisms	insulin receptor substrate 1 isoform X1 [Anoplophora glabripennis]
c52641.graph_c0	212	452	209	552	549	776	5.97	10.41	5.19	12.06	13.92	20.71	0.00769414	1.24894	up	[G]	Carbohydrate transport and metabolism	Cellular Component: integral component of membrane (GO:0016021);; Molecular Function: transmembrane transporter activity (GO:0022857);; Biological Process: transmembrane transport (GO:0055085);;	--	[R]	General function prediction only	Major Facilitator Superfamily;; Sugar (and other) transporter	Organic cation transporter protein OS=Drosophila melanogaster OX=7227 GN=Orct PE=1 SV=1	G	Carbohydrate transport and metabolism	organic cation transporter protein-like [Anoplophora glabripennis]
c55490.graph_c0	557	1010	614	1463	1476	1770	15.76	22.2	15.4	33.77	41.53	49.7	0.000605049	1.24849	up	[G]	Carbohydrate transport and metabolism	Molecular Function: catalytic activity (GO:0003824);; Biological Process: metabolic process (GO:0008152);;	K00615|4.19858e-88|ame:550804|K00615 transketolase [EC:2.2.1.1] | (RefSeq) GB15619; transketolase	[G]	Carbohydrate transport and metabolism	Transketolase, C-terminal domain;; Transketolase, pyrimidine binding domain	Activity-regulated cytoskeleton associated protein 1 OS=Drosophila melanogaster OX=7227 GN=Arc1 PE=1 SV=1	G	Carbohydrate transport and metabolism	transketolase-like protein 2 [Anoplophora glabripennis]
c58229.graph_c0	194	201	302	335	658	514	3.55	2.95	4.9	5.36	11.81	10.46	0.00790436	1.24786	up	[M]	Cell wall/membrane/envelope biogenesis	--	K15046|0|tca:656281|K15046 influenza virus NS1A-binding protein | (RefSeq) influenza virus NS1A-binding protein	[TR]	--	Kelch motif;; Kelch motif;; Galactose oxidase, central domain;; Galactose oxidase, central domain;; Kelch motif;; Kelch motif;; BTB And C-terminal Kelch	Kelch-like protein diablo OS=Drosophila pseudoobscura pseudoobscura OX=46245 GN=dbo PE=3 SV=2	S	Function unknown	influenza virus NS1A-binding protein isoform X1 [Anoplophora glabripennis]
c57937.graph_c0	118	177	133	343	408	189	2.19	2.68	2.14	4.92	6.9	3.36	0.00513923	1.24733	up	[C]	Energy production and conversion	Molecular Function: copper ion binding (GO:0005507);; Molecular Function: oxidoreductase activity, acting on paired donors, with incorporation or reduction of molecular oxygen, reduced ascorbate as one donor, and incorporation of one atom of oxygen (GO:0016715);; Biological Process: oxidation-reduction process (GO:0055114);;	--	[E]	Amino acid transport and metabolism	Copper type II ascorbate-dependent monooxygenase, C-terminal domain;; Copper type II ascorbate-dependent monooxygenase, N-terminal domain;; DOMON domain	MOXD1 homolog 1 OS=Drosophila melanogaster OX=7227 GN=CG5235 PE=2 SV=2	S	Function unknown	MOXD1 homolog 1 [Anoplophora glabripennis]
c54810.graph_c0	251	305	211	475	638	568	4.76	4.7	3.48	6.95	11.01	10.28	0.00101676	1.24679	up	--	--	Cellular Component: membrane (GO:0016020);; Molecular Function: transferase activity (GO:0016740);;	--	[G]	Carbohydrate transport and metabolism	Galactosyltransferase	Beta-1,3-galactosyltransferase bre-2 OS=Caenorhabditis elegans OX=6239 GN=bre-2 PE=1 SV=1	S	Function unknown	beta-1,3-galactosyltransferase 5-like [Anoplophora glabripennis]
c59604.graph_c1	390	420	662	1041	1390	779	9.89	11.93	16.04	15.93	20.16	18.09	0.00280172	1.24588	up	--	--	--	--	[U]	Intracellular trafficking, secretion, and vesicular transport	Domain of unknown function (DUF4704)	Neurobeachin OS=Drosophila melanogaster OX=7227 GN=rg PE=1 SV=4	S	Function unknown	neurobeachin [Anoplophora glabripennis]
c58489.graph_c0	346	838	695	1023	1137	1796	5.04	10.7	8.98	10.99	14.47	22.35	0.00878191	1.24471	up	[S]	Function unknown	--	--	--	--	Macro domain	--	S	Function unknown	putative uncharacterized protein DDB_G0282133 isoform X1 [Anoplophora glabripennis]
c58213.graph_c0	1483	1899	2331	5960	4292	2407	28.44	30.06	35.1	60.13	54.26	39.36	0.00314304	1.24401	up	--	--	Molecular Function: magnesium ion binding (GO:0000287);; Molecular Function: holo-[acyl-carrier-protein] synthase activity (GO:0008897);; Cellular Component: integral component of membrane (GO:0016021);;	--	[T]	Signal transduction mechanisms	Laminin G domain;; Laminin G domain;; Concanavalin A-like lectin/glucanases superfamily;; EGF-like domain	Neurexin-4 OS=Drosophila melanogaster OX=7227 GN=Nrx-IV PE=1 SV=2	S	Function unknown	neurexin-4 [Anoplophora glabripennis]
c58592.graph_c0	787	951	1128	2718	2263	1342	7.54	8.71	9.89	25.53	24.03	11.54	0.000842653	1.24222	up	[U]	Intracellular trafficking, secretion, and vesicular transport	Molecular Function: calcium ion binding (GO:0005509);; Cellular Component: plasma membrane (GO:0005886);; Biological Process: homophilic cell adhesion via plasma membrane adhesion molecules (GO:0007156);; Cellular Component: integral component of membrane (GO:0016021);;	--	[S]	Function unknown	Cadherin domain;; Cadherin-like;; Cadherin-like;; Cadherin prodomain like	Cadherin-87A OS=Drosophila melanogaster OX=7227 GN=Cad87A PE=1 SV=4	S	Function unknown	PREDICTED: LOW QUALITY PROTEIN: cadherin-87A-like [Aethina tumida]
c59155.graph_c0	1192	1681	2385	4003	3730	3587	14.44	18.91	26.12	36.9	43.11	43.61	0.000203901	1.24128	up	--	--	Molecular Function: serine-type endopeptidase inhibitor activity (GO:0004867);; Cellular Component: extracellular region (GO:0005576);; Biological Process: negative regulation of endopeptidase activity (GO:0010951);; Cellular Component: integral component of membrane (GO:0016021);;	--	[T]	Signal transduction mechanisms	Thyroglobulin type-1 repeat;; Kunitz/Bovine pancreatic trypsin inhibitor domain;; Antistasin family;; WAP-type (Whey Acidic Protein) 'four-disulfide core';; Lustrin, cysteine-rich repeated domain	Uncharacterized protein ZC84.1 OS=Caenorhabditis elegans OX=6239 GN=ZC84.1 PE=3 SV=6	S	Function unknown	balbiani ring protein 3-like [Anoplophora glabripennis]
c59599.graph_c1	100	137	186	297	366	249	5.25	3.46	5.86	4.42	4.8	4.95	0.00152536	1.24099	up	[D]	Cell cycle control, cell division, chromosome partitioning	--	--	[M]	Cell wall/membrane/envelope biogenesis	Ankyrin repeats (3 copies);; Ankyrin repeats (many copies);; Ankyrin repeats (many copies);; Ankyrin repeat;; Ankyrin repeat;; NACHT domain	Ankyrin repeat, PH and SEC7 domain containing protein secG OS=Dictyostelium discoideum OX=44689 GN=secG PE=2 SV=1	S	Function unknown	uncharacterized protein LOC108909316 [Anoplophora glabripennis]
c57480.graph_c0	125	116	185	267	433	227	1.41	1.06	1.81	2.31	4.43	2.43	0.00923434	1.23731	up	--	--	--	--	--	--	Chitin binding Peritrophin-A domain	--	G	Carbohydrate transport and metabolism	uncharacterized protein LOC108918005 [Anoplophora glabripennis]
c58082.graph_c0	339	465	426	1263	875	574	2.84	3.33	3.29	9.73	7.8	5.06	0.00124456	1.23575	up	[T]	Signal transduction mechanisms	Molecular Function: protein kinase activity (GO:0004672);; Molecular Function: ATP binding (GO:0005524);; Biological Process: protein phosphorylation (GO:0006468);;	K08840|0|tca:656940|K08840 TRAF2 and NCK interacting kinase [EC:2.7.11.1] | (RefSeq) serine/threonine-protein kinase mig-15	[T]	Signal transduction mechanisms	Protein kinase domain;; CNH domain;; Protein tyrosine kinase	Serine/threonine-protein kinase mig-15 OS=Caenorhabditis elegans OX=6239 GN=mig-15 PE=2 SV=3	T	Signal transduction mechanisms	mitogen-activated protein kinase kinase kinase kinase 4 isoform X1 [Anoplophora glabripennis]
c58818.graph_c0	323	464	310	942	803	646	5.1	5.64	4.48	10.31	11.3	11.78	0.000228149	1.23039	up	[M]	Cell wall/membrane/envelope biogenesis	Molecular Function: ATP binding (GO:0005524);; Cellular Component: integral component of membrane (GO:0016021);; Molecular Function: ATPase activity (GO:0016887);;	--	[Q]	Secondary metabolites biosynthesis, transport and catabolism	ABC transporter;; ABC-2 type transporter	ABC transporter G family member 1 OS=Dictyostelium discoideum OX=44689 GN=abcG1 PE=3 SV=1	V	Defense mechanisms	ATP-binding cassette sub-family G member 5 [Anoplophora glabripennis]
c34375.graph_c0	316	583	663	1393	861	1077	79.06	116.44	143.25	259.05	184.52	242.32	0.00105419	1.22492	up	--	--	--	--	--	--	--	--	--	--	glycine-rich RNA-binding protein 2, mitochondrial-like isoform X2 [Anoplophora glabripennis]
c57489.graph_c0	659	980	830	1870	1844	1579	8.47	11.26	9.76	20.05	22.64	21.39	7.80637e-06	1.22479	up	--	--	Biological Process: cellular process (GO:0009987);; Molecular Function: hydrolase activity (GO:0016787);;	K08601|0|tca:663788|K08601 ubiquitin thioesterase [EC:3.4.19.12] | (RefSeq) ubiquitin carboxyl-terminal hydrolase CYLD	[R]	General function prediction only	CAP-Gly domain	--	O	Posttranslational modification, protein turnover, chaperones	ubiquitin carboxyl-terminal hydrolase CYLD [Anoplophora glabripennis]
c55605.graph_c1	4783	5197	6118	9852	14178	10518	184.81	164.83	207.9	297.82	503.64	399.85	0.000367018	1.22398	up	--	--	--	--	--	--	--	--	--	--	uncharacterized protein LOC108907831 isoform X1 [Anoplophora glabripennis]
c59324.graph_c0	104	169	218	387	434	223	1.47	1.94	2.68	4.25	5.51	3.01	0.00701577	1.21911	up	[T]	Signal transduction mechanisms	--	K05725|0|tca:664221|K05725 focal adhesion kinase 1 [EC:2.7.10.2] | (RefSeq) focal adhesion kinase 1	[T]	Signal transduction mechanisms	Protein tyrosine kinase;; Focal adhesion targeting region;; Protein kinase domain;; FERM central domain	Inactive tyrosine-protein kinase kin-32 OS=Caenorhabditis elegans OX=6239 GN=kin-32 PE=1 SV=1	T	Signal transduction mechanisms	focal adhesion kinase 1 isoform X6 [Anoplophora glabripennis]
c57804.graph_c2	500	553	716	1215	969	1596	18.73	14.01	16.67	34.69	29.23	44.27	0.00119705	1.21777	up	[K]	Transcription	--	--	[R]	General function prediction only	Leucine rich repeat;; Leucine rich repeats (6 copies);; Leucine Rich repeats (2 copies);; Leucine-rich repeat	Toll-like receptor 7 OS=Drosophila melanogaster OX=7227 GN=Toll-7 PE=1 SV=1	S	Function unknown	protein artichoke-like [Anoplophora glabripennis]
c56798.graph_c0	478	349	705	879	1231	1177	9.58	5.54	12.27	13.46	22.69	21.47	0.00779806	1.21625	up	--	--	--	--	--	--	Domain of unknown function (DUF4804)	--	S	Function unknown	uncharacterized protein LOC108905878 [Anoplophora glabripennis]
c59200.graph_c0	784	917	991	2515	1591	1719	10.17	9.82	11.29	25.41	19.7	25.11	6.20426e-05	1.21267	up	[D]	Cell cycle control, cell division, chromosome partitioning	--	--	[M]	Cell wall/membrane/envelope biogenesis	Ankyrin repeats (3 copies);; Ankyrin repeats (many copies);; Ankyrin repeat;; Ankyrin repeat;; Ankyrin repeats (many copies);; NACHT domain	Ankyrin repeat, PH and SEC7 domain containing protein secG OS=Dictyostelium discoideum OX=44689 GN=secG PE=2 SV=1	S	Function unknown	uncharacterized protein LOC108905886 [Anoplophora glabripennis]
c59186.graph_c0	528	407	642	1362	1094	952	27.3	18.86	27.97	35.75	41.46	38.09	0.00117116	1.19688	up	--	;;	Molecular Function: nucleotide binding (GO:0000166);; Molecular Function: protein kinase activity (GO:0004672);; Biological Process: phosphorylation (GO:0016310);;	K04730|0|tca:654877|K04730 interleukin-1 receptor-associated kinase 1 [EC:2.7.11.1] | (RefSeq) IL-1, pll; pelle	[T]	Signal transduction mechanisms	Protein tyrosine kinase;; Protein kinase domain;; Death domain	Serine/threonine-protein kinase pelle OS=Drosophila melanogaster OX=7227 GN=pll PE=1 SV=1	T	Signal transduction mechanisms	serine/threonine-protein kinase pelle-like [Anoplophora glabripennis]
c58933.graph_c0	303	489	392	878	680	914	3.4	4.46	3.83	7.62	6.96	9.81	0.000208001	1.19114	up	[E]	Amino acid transport and metabolism	Molecular Function: aminopeptidase activity (GO:0004177);; Biological Process: proteolysis (GO:0006508);; Molecular Function: metallopeptidase activity (GO:0008237);; Molecular Function: zinc ion binding (GO:0008270);; Cellular Component: membrane (GO:0016020);;	K11140|0|tca:657312|K11140 aminopeptidase N [EC:3.4.11.2] | (RefSeq) aminopeptidase N	[EO]	--	Peptidase family M1 domain;; ERAP1-like C-terminal domain	Aminopeptidase N OS=Plutella xylostella OX=51655 GN=APN1 PE=1 SV=1	E	Amino acid transport and metabolism	aminopeptidase N [Anoplophora glabripennis]
c55574.graph_c0	18786	18765	24338	49841	57056	25147	283.95	216.57	262.03	343.9	463.14	333.98	0.00657615	1.19016	up	--	--	--	K04437|0|nvi:100123445|K04437 filamin | (RefSeq) filamin-A	[Z]	Cytoskeleton	Filamin/ABP280 repeat;; Calponin homology (CH) domain;; Y_Y_Y domain;; Domain of unknown function (DUF5060);; emp24/gp25L/p24 family/GOLD;; YtkA-like;; Bacterial Ig-like domain (group 3)	Filamin-A OS=Drosophila melanogaster OX=7227 GN=cher PE=1 SV=2	Z	Cytoskeleton	filamin-A isoform X1 [Anoplophora glabripennis]
c58302.graph_c0	131	205	184	371	338	373	1.58	1.78	2.19	3.35	3.51	4.79	0.000131945	1.18803	up	--	--	--	--	--	--	--	--	--	--	putative leucine-rich repeat-containing protein DDB_G0290503 isoform X2 [Anoplophora glabripennis]
c53050.graph_c0	228	191	230	408	546	422	12.6	8.63	11.13	17.44	27.25	22.21	0.002131	1.18468	up	--	--	--	--	--	--	--	--	--	--	uncharacterized protein LOC108910040 isoform X2 [Anoplophora glabripennis]
c49749.graph_c0	196	226	174	595	298	388	7.2	6.72	5.55	41.89	22.71	30.09	0.00338639	1.1837	up	--	--	--	--	--	--	--	--	--	--	uncharacterized protein LOC108907908 isoform X2 [Anoplophora glabripennis]
c47105.graph_c1	10331	11771	13092	25025	22905	25730	1127.09	1036.48	1239.81	2074.95	2216.2	2616.83	1.18116e-05	1.18273	up	[O]	Posttranslational modification, protein turnover, chaperones	Biological Process: sulfate assimilation (GO:0000103);; Cellular Component: nucleus (GO:0005634);; Cellular Component: mitochondrion (GO:0005739);; Biological Process: protein folding (GO:0006457);; Biological Process: glycerol ether metabolic process (GO:0006662);; Biological Process: cellular response to DNA damage stimulus (GO:0006974);; Biological Process: determination of adult lifespan (GO:…	K03671|1.83171e-23|tca:656356|K03671 thioredoxin 1 | (RefSeq) thioredoxin-2	[O]	Posttranslational modification, protein turnover, chaperones	Thioredoxin;; AhpC/TSA family	Thioredoxin-2 OS=Drosophila melanogaster OX=7227 GN=Trx-2 PE=1 SV=3	O	Posttranslational modification, protein turnover, chaperones	thioredoxin-2 [Anoplophora glabripennis]
c55824.graph_c0	189	248	211	448	508	397	4.35	4.64	4.24	8.01	10.55	8.77	0.000202401	1.1807	up	[T]	Signal transduction mechanisms	Molecular Function: protein kinase activity (GO:0004672);; Molecular Function: ATP binding (GO:0005524);; Biological Process: protein phosphorylation (GO:0006468);;	K04409|0|tca:655315|K04409 p21-activated kinase 1 [EC:2.7.11.1] | (RefSeq) serine/threonine-protein kinase PAK 1	[T]	Signal transduction mechanisms	Protein kinase domain;; Protein tyrosine kinase;; Kinase-like	Serine/threonine-protein kinase pak-1 OS=Caenorhabditis elegans OX=6239 GN=pak-1 PE=1 SV=2	T	Signal transduction mechanisms	serine/threonine-protein kinase PAK 1 [Anoplophora glabripennis]
c58172.graph_c1	570	515	426	901	918	1377	13.54	9.99	8.81	16.49	19.82	30.95	0.00665174	1.17749	up	[V]	Defense mechanisms	--	K05673|0|tca:657184|K05673 ATP-binding cassette, subfamily C (CFTR/MRP), member 4 | (RefSeq) probable multidrug resistance-associated protein lethal(2)03659	[Q]	Secondary metabolites biosynthesis, transport and catabolism	ABC transporter transmembrane region;; ABC transporter	Probable multidrug resistance-associated protein lethal(2)03659 OS=Drosophila melanogaster OX=7227 GN=l(2)03659 PE=2 SV=4	V	Defense mechanisms	probable multidrug resistance-associated protein lethal(2)03659 isoform X2 [Anoplophora glabripennis]
c53650.graph_c0	152	226	169	384	384	367	5.53	6.67	5.35	10.74	12.64	12.67	0.000212933	1.17656	up	--	--	--	--	--	--	--	--	--	--	uncharacterized protein LOC108909081 [Anoplophora glabripennis]
c20491.graph_c0	251	263	296	381	578	713	27.12	22.93	27.75	31.29	55.5	71.75	0.00767447	1.17427	up	--	--	--	--	--	--	Sep15/SelM redox domain	Selenoprotein M OS=Eriocheir sinensis OX=95602 GN=Selenom PE=2 SV=1	S	Function unknown	selenoprotein M [Anoplophora glabripennis]
c55793.graph_c0	503	714	718	1251	1397	1332	9.11	10.51	11.31	17.46	23.01	23.01	5.50374e-05	1.1742	up	[E]	Amino acid transport and metabolism	Molecular Function: catalytic activity (GO:0003824);; Cellular Component: membrane (GO:0016020);;	K01278|0|tca:660714|K01278 dipeptidyl-peptidase 4 [EC:3.4.14.5] | (RefSeq) venom dipeptidyl peptidase 4	[O]	Posttranslational modification, protein turnover, chaperones	Dipeptidyl peptidase IV (DPP IV) N-terminal region;; Prolyl oligopeptidase family	Venom dipeptidyl peptidase 4 OS=Apis mellifera OX=7460 PE=1 SV=1	E	Amino acid transport and metabolism	venom dipeptidyl peptidase 4 isoform X1 [Anoplophora glabripennis]
c57635.graph_c0	2596	3998	3537	6136	7268	7340	67.16	83.46	80.11	122.47	172.38	182.01	0.000137895	1.17366	up	--	--	Biological Process: proteolysis (GO:0006508);; Molecular Function: cysteine-type peptidase activity (GO:0008234);;	--	[O]	Posttranslational modification, protein turnover, chaperones	Cathepsin propeptide inhibitor domain (I29)	Cathepsin L-like proteinase OS=Phaedon cochleariae OX=80249 PE=2 SV=1	O	Posttranslational modification, protein turnover, chaperones	protein CTLA-2-alpha-like isoform X1 [Anoplophora glabripennis]
c55384.graph_c0	11233	11474	12803	28699	25470	20564	159.06	129.99	157.93	315.7	327.56	274.54	4.9583e-05	1.17185	up	--	--	Molecular Function: actin binding (GO:0003779);; Cellular Component: cytoplasm (GO:0005737);; Cellular Component: cytoskeleton (GO:0005856);; Cellular Component: extrinsic component of membrane (GO:0019898);;	--	[R]	General function prediction only	Ezrin/radixin/moesin family;; FERM central domain;; FERM C-terminal PH-like domain;; FERM N-terminal domain	Moesin/ezrin/radixin homolog 1 OS=Culex quinquefasciatus OX=7176 GN=Moe PE=3 SV=1	S	Function unknown	moesin/ezrin/radixin homolog 1 isoform X1 [Anoplophora glabripennis]
c59334.graph_c1	438	538	547	1141	800	1222	6.54	6.69	7	22.29	15.75	29.76	0.000392351	1.16996	up	--	--	--	--	--	--	Phage integrase family	--	S	Function unknown	uncharacterized protein LOC111692276 [Anoplophora glabripennis]
c45036.graph_c0	480	491	449	1245	660	1102	73.86	58.8	57.96	143.58	89.06	153.46	0.00274615	1.16856	up	--	--	--	--	--	--	--	--	--	--	hypothetical protein YQE_04242, partial [Dendroctonus ponderosae]
c58754.graph_c0	530	619	697	1488	1435	906	6.58	6.28	7.29	14.53	17.29	12.17	0.000617573	1.15875	up	--	--	Cellular Component: intracellular (GO:0005622);; Molecular Function: kinase activity (GO:0016301);; Biological Process: phosphatidylinositol phosphorylation (GO:0046854);; Biological Process: phosphatidylinositol-mediated signaling (GO:0048015);;	K19801|0|tca:661577|K19801 phosphatidylinositol 4-kinase B [EC:2.7.1.67] | (RefSeq) fwd; four wheel drive	[TU]	--	Phosphatidylinositol 3- and 4-kinase	Phosphatidylinositol 4-kinase OS=Dictyostelium discoideum OX=44689 GN=pikD PE=3 SV=3	I	Lipid transport and metabolism	PREDICTED: phosphatidylinositol 4-kinase beta [Aethina tumida]
c56948.graph_c0	405	451	707	861	971	1339	5.74	5.05	8.36	9.25	11.85	17.86	0.0062196	1.15838	up	--	--	Cellular Component: integral component of membrane (GO:0016021);;	--	--	--	Domain of unknown function (DUF4203)	--	S	Function unknown	transmembrane protein 198 isoform X2 [Anoplophora glabripennis]
c55528.graph_c0	152	156	199	322	305	415	5.71	4.13	6.61	8.09	8.13	12.11	0.00185935	1.15785	up	--	--	--	--	--	--	Protein of unknown function (DUF229);; Sulfatase	--	S	Function unknown	uncharacterized protein LOC108911111 [Anoplophora glabripennis]
c49397.graph_c0	654	1006	703	1886	1816	1138	8.67	10.62	7.9	18.99	21.04	14.91	0.00154411	1.14648	up	[T]	Signal transduction mechanisms	Molecular Function: DNA binding (GO:0003677);; Cellular Component: nucleus (GO:0005634);; Biological Process: regulation of transcription, DNA-templated (GO:0006355);; Molecular Function: protein dimerization activity (GO:0046983);;	K09098|0|tca:655476|K09098 neuronal PAS domain-containing protein 1/3 | (RefSeq) Trh; protein trachealess	[TK]	--	PAS fold;; PAS domain;; PAS fold;; PAS domain;; Helix-loop-helix DNA-binding domain	Protein trachealess OS=Drosophila melanogaster OX=7227 GN=trh PE=1 SV=4	K	Transcription	trachealess [Tribolium castaneum]
c58811.graph_c0	184	202	278	401	504	440	3.33	2.59	3.2	6.08	10.02	10.38	0.00147772	1.14491	up	--	--	Molecular Function: Rho guanyl-nucleotide exchange factor activity (GO:0005089);; Cellular Component: cytoskeleton (GO:0005856);; Biological Process: regulation of Rho protein signal transduction (GO:0035023);; Biological Process: positive regulation of GTPase activity (GO:0043547);;	K06082|0|tca:655359|K06082 FERM, RhoGEF and pleckstrin domain protein 2 | (RefSeq) FERM, RhoGEF and pleckstrin domain-containing protein 1	[T]	Signal transduction mechanisms	FERM C-terminal PH-like domain;; FERM central domain;; FERM N-terminal domain;; FERM adjacent (FA);; PH domain;; RhoGEF domain;; Pleckstrin homology domain	Protein 4.1 homolog OS=Drosophila melanogaster OX=7227 GN=cora PE=1 SV=1	T	Signal transduction mechanisms	FERM, ARHGEF and pleckstrin domain-containing protein 1 isoform X2 [Anoplophora glabripennis]
c50455.graph_c1	2618	3506	2089	6998	4693	5306	138.81	150.54	96.39	284.37	224.49	266.73	0.00168638	1.14442	up	[O]	Posttranslational modification, protein turnover, chaperones	Biological Process: response to oxidative stress (GO:0006979);; Molecular Function: peptide-methionine (S)-S-oxide reductase activity (GO:0008113);; Biological Process: protein repair (GO:0030091);; Biological Process: oxidation-reduction process (GO:0055114);;	K07304|1.6461e-133|tca:655619|K07304 peptide-methionine (S)-S-oxide reductase [EC:1.8.4.11] | (RefSeq) peptide methionine sulfoxide reductase	[O]	Posttranslational modification, protein turnover, chaperones	Peptide methionine sulfoxide reductase	Peptide methionine sulfoxide reductase OS=Drosophila melanogaster OX=7227 GN=Eip71CD PE=2 SV=2	O	Posttranslational modification, protein turnover, chaperones	peptide methionine sulfoxide reductase isoform X1 [Anoplophora glabripennis]
c58806.graph_c0	1901	2462	2446	6138	4246	3566	27.49	27.9	27.62	56.11	44.33	50.17	0.000263819	1.1363	up	--	--	Cellular Component: integral component of membrane (GO:0016021);;	--	[T]	Signal transduction mechanisms	DOMON domain;; Procyclic acidic repetitive protein (PARP);; Lytic polysaccharide mono-oxygenase, cellulose-degrading;; EGF-like domain	--	S	Function unknown	uncharacterized protein LOC108905871 isoform X1 [Anoplophora glabripennis]
c55021.graph_c0	822	807	1000	1941	1905	1521	9.92	9.1	9.74	13.05	15.5	18.79	0.000215364	1.13301	up	[T]	Signal transduction mechanisms	Molecular Function: magnesium ion binding (GO:0000287);; Molecular Function: protein serine/threonine kinase activity (GO:0004674);; Molecular Function: ATP binding (GO:0005524);; Biological Process: protein phosphorylation (GO:0006468);;	K08789|0|tca:661405|K08789 microtubule-associated serine/threonine kinase [EC:2.7.11.1] | (RefSeq) microtubule-associated serine/threonine-protein kinase 3	[TR]	--	Domain of unknown function (DUF1908);; Protein kinase domain;; Protein tyrosine kinase;; Kinase-like;; Phosphotransferase enzyme family	Probable serine/threonine-protein kinase DDB_G0272282 OS=Dictyostelium discoideum OX=44689 GN=DDB_G0272282 PE=3 SV=1	T	Signal transduction mechanisms	microtubule-associated serine/threonine-protein kinase 3 isoform X1 [Anoplophora glabripennis]
c58031.graph_c0	3555	3649	5235	8514	9244	7370	56.91	47.33	71.66	103.35	131.73	110.23	0.000517216	1.13055	up	[O]	Posttranslational modification, protein turnover, chaperones	--	--	[V]	Defense mechanisms	Serpin (serine protease inhibitor)	Serine protease inhibitor 28Dc OS=Drosophila melanogaster OX=7227 GN=Spn28Dc PE=2 SV=2	O	Posttranslational modification, protein turnover, chaperones	serine protease inhibitor 28Dc-like [Anoplophora glabripennis]
c58668.graph_c0	184	288	333	544	608	450	3.59	4.55	5.59	8.05	10.44	8.25	0.00123429	1.1294	up	--	--	Biological Process: signal transduction (GO:0007165);;	--	[R]	General function prediction only	Ankyrin repeats (many copies)	--	S	Function unknown	uncharacterized protein LOC108912914 isoform X1 [Anoplophora glabripennis]
c46086.graph_c0	429	558	491	903	892	1167	12.43	13.13	12.4	20.18	23.46	32.21	0.000638304	1.12893	up	--	--	--	K03122|3.1012e-68|tca:657518|K03122 transcription initiation factor TFIIA large subunit | (RefSeq) transcription initiation factor IIA subunit 1	[K]	Transcription	Transcription factor IIA, alpha/beta subunit	Transcription initiation factor IIA subunit 1 OS=Drosophila melanogaster OX=7227 GN=TfIIA-L PE=1 SV=2	K	Transcription	transcription initiation factor IIA subunit 1 [Anoplophora glabripennis]
c59069.graph_c0	1169	1396	1597	3559	3190	1736	13.05	12.55	15.53	31.66	35.79	18.66	0.00367164	1.12828	up	--	--	Molecular Function: actin binding (GO:0003779);;	K10369|0|cfo:105254811|K10369 supervillin | (RefSeq) uncharacterized LOC105254811	[Z]	Cytoskeleton	Gelsolin repeat;; Villin headpiece domain	Villidin OS=Dictyostelium discoideum OX=44689 GN=vilA PE=1 SV=2	S	Function unknown	supervillin-like isoform X1 [Anoplophora glabripennis]
c53656.graph_c0	344	482	414	826	757	900	7.01	7.98	7.35	12.99	14.05	17.52	0.000149624	1.12748	up	--	--	Biological Process: cellular protein modification process (GO:0006464);; Cellular Component: integral component of membrane (GO:0016021);;	K16610|0|tca:660482|K16610 tubulin monoglycylase TTLL15 | (RefSeq) tubulin polyglutamylase TTLL4	[O]	Posttranslational modification, protein turnover, chaperones	Tubulin-tyrosine ligase family	Tubulin polyglutamylase ttll-4 OS=Caenorhabditis briggsae OX=6238 GN=ttll-4 PE=3 SV=1	S	Function unknown	tubulin polyglutamylase TTLL4 isoform X1 [Anoplophora glabripennis]
c49597.graph_c0	515	822	804	1143	1730	1351	10.44	13.55	14.19	17.87	31.9	26.14	0.00233368	1.12735	up	--	--	Cellular Component: cytoplasm (GO:0005737);; Cellular Component: cytoskeleton (GO:0005856);; Biological Process: actin filament organization (GO:0007015);; Molecular Function: protein binding, bridging (GO:0030674);; Molecular Function: actin filament binding (GO:0051015);;	K17455|0|tca:661226|K17455 fascin 1/2 | (RefSeq) protein singed	--	--	Fascin domain;; FRG1-like domain;; Fibroblast growth factor	Protein singed OS=Drosophila melanogaster OX=7227 GN=sn PE=3 SV=1	O	Posttranslational modification, protein turnover, chaperones	protein singed [Anoplophora glabripennis]
c58733.graph_c2	194	230	229	524	402	398	2.72	2.63	2.8	5.64	5.02	5.31	0.000142002	1.12518	up	--	--	Molecular Function: metal ion binding (GO:0046872);;	--	[TU]	--	Domain of unknown function (DUF4704)	BEACH domain-containing protein lvsA OS=Dictyostelium discoideum OX=44689 GN=lvsA PE=4 SV=2	S	Function unknown	WD repeat and FYVE domain-containing protein 3 [Anoplophora glabripennis]
c56460.graph_c0	581	690	682	1523	1246	1173	23.01	23.89	28.41	49.39	51.58	42.73	2.97741e-05	1.12035	up	--	--	Biological Process: cellular protein modification process (GO:0006464);; Biological Process: methylation (GO:0032259);;	--	--	--	Ly6/PLAUR domain-containing protein 6, Lypd6	--	S	Function unknown	uncharacterized protein LOC108913970 [Anoplophora glabripennis]
c55174.graph_c0	103	111	130	328	220	156	2.38	1.8	2.43	4.96	4.22	2.78	0.00775343	1.11938	up	--	--	Molecular Function: microtubule motor activity (GO:0003777);; Molecular Function: ATP binding (GO:0005524);; Cellular Component: cell (GO:0005623);; Molecular Function: microtubule binding (GO:0008017);; Biological Process: plus-end-directed vesicle transport along microtubule (GO:0072383);;	K17914|0|tca:661047|K17914 kinesin family member 13 | (RefSeq) kinesin-3A; kinesin 3A	[Z]	Cytoskeleton	Kinesin protein;; CAP-Gly domain;; Kinesin protein 1B	Kinesin-like protein unc-104 OS=Caenorhabditis elegans OX=6239 GN=unc-104 PE=1 SV=4	Z	Cytoskeleton	kinesin-like protein KIF13B isoform X1 [Anoplophora glabripennis]
c41268.graph_c0	1096	1659	1535	2705	3126	2628	33.73	41.43	41.09	64.09	87.23	76.91	0.000150294	1.11428	up	--	--	Cellular Component: integral component of membrane (GO:0016021);;	--	--	--	PMP-22/EMP/MP20/Claudin tight junction	--	S	Function unknown	uncharacterized protein LOC108905791 [Anoplophora glabripennis]
c55103.graph_c2	162	215	298	523	451	368	5.14	5.72	8.38	13.37	13.68	11.29	0.00179084	1.11346	up	--	--	--	K15369|1.02026e-34|tca:661863|K15369 trafficking kinesin-binding protein 1 | (RefSeq) trafficking kinesin-binding protein milt	--	--	--	--	U	Intracellular trafficking, secretion, and vesicular transport	trafficking kinesin-binding protein milt isoform X3 [Anoplophora glabripennis]
c51772.graph_c0	971	1472	1451	2958	2177	2565	31.81	39.02	41.23	74.41	64.81	79.81	9.98645e-05	1.1092	up	--	--	Cellular Component: integral component of membrane (GO:0016021);;	--	--	--	PMP-22/EMP/MP20/Claudin tight junction	--	S	Function unknown	uncharacterized protein LOC108908434 isoform X1 [Anoplophora glabripennis]
c54490.graph_c0	212	190	282	505	523	347	3.04	2.15	3.53	5.53	6.9	5.18	0.00423159	1.10748	up	--	--	--	--	[K]	Transcription	BAH domain	--	S	Function unknown	uncharacterized protein LOC108911080 [Anoplophora glabripennis]
c48533.graph_c0	678	905	901	1633	1492	1774	41.41	44.84	47.86	76.44	82.02	102.26	9.73504e-05	1.10665	up	--	--	Cellular Component: integral component of membrane (GO:0016021);;	--	--	--	--	--	S	Function unknown	uncharacterized protein LOC108916343 [Anoplophora glabripennis]
c58346.graph_c0	287	246	409	722	739	435	3.74	3.44	4.67	7.61	8.13	5.01	0.00971745	1.1061	up	--	--	Molecular Function: phosphatidylinositol phospholipase C activity (GO:0004435);; Molecular Function: signal transducer activity (GO:0004871);; Molecular Function: calcium ion binding (GO:0005509);; Cellular Component: intracellular (GO:0005622);; Biological Process: lipid catabolic process (GO:0016042);; Biological Process: intracellular signal transduction (GO:0035556);;	K05858|0|tca:659062|K05858 phosphatidylinositol phospholipase C, beta [EC:3.1.4.11] | (RefSeq) 1-phosphatidylinositol 4,5-bisphosphate phosphodiesterase	[I]	Lipid transport and metabolism	Phosphatidylinositol-specific phospholipase C, X domain;; Phosphatidylinositol-specific phospholipase C, Y domain;; Protein of unknown function (DUF1154);; Phosphoinositide-specific phospholipase C, efhand-like;; C2 domain	1-phosphatidylinositol 4,5-bisphosphate phosphodiesterase OS=Drosophila melanogaster OX=7227 GN=norpA PE=1 SV=4	S	Function unknown	1-phosphatidylinositol 4,5-bisphosphate phosphodiesterase isoform X1 [Anoplophora glabripennis]
c24997.graph_c0	498	623	633	1176	1036	1257	35.81	36.26	39.55	64.67	66.79	85.03	0.000119732	1.10548	up	--	--	Cellular Component: integral component of membrane (GO:0016021);;	--	--	--	--	--	S	Function unknown	uncharacterized protein LOC108916730 [Anoplophora glabripennis]
c58365.graph_c0	9884	11154	18783	23575	25512	28841	745.55	680.96	1229.95	1336.03	1721.19	2070.62	0.00456708	1.10471	up	[O]	Posttranslational modification, protein turnover, chaperones	Molecular Function: serine-type peptidase activity (GO:0008236);; Cellular Component: membrane (GO:0016020);;	--	[E]	Amino acid transport and metabolism	Trypsin	CLIP domain-containing serine protease 2 OS=Bombyx mori OX=7091 PE=1 SV=1	O	Posttranslational modification, protein turnover, chaperones	uncharacterized protein LOC108917267 [Anoplophora glabripennis]
c41262.graph_c0	267	309	409	654	632	657	20.43	19.07	27.13	38.28	43.27	46.91	0.000477924	1.10377	up	--	--	Cellular Component: integral component of membrane (GO:0016021);;	--	--	--	--	--	S	Function unknown	uncharacterized protein LOC108916338 [Anoplophora glabripennis]
c59540.graph_c0	114	142	183	279	313	271	1.85	1.3	1.87	2.7	3.72	2.66	0.00163427	1.10345	up	--	--	Cellular Component: integral component of membrane (GO:0016021);;	--	[S]	Function unknown	Pecanex protein (C-terminus);; FERM central domain	Protein pecanex OS=Drosophila melanogaster OX=7227 GN=pcx PE=2 SV=4	S	Function unknown	pecanex-like protein 1 [Anoplophora glabripennis]
c50877.graph_c0	620	734	734	1505	1450	1196	6.34	6.28	6.31	28.25	20.21	14.2	6.39993e-05	1.10255	up	[T]	Signal transduction mechanisms	Molecular Function: protein tyrosine phosphatase activity (GO:0004725);; Biological Process: peptidyl-tyrosine dephosphorylation (GO:0035335);;	K16667|0|tca:660278|K16667 receptor-type tyrosine-protein phosphatase gamma [EC:3.1.3.48] | (RefSeq) tyrosine-protein phosphatase 99A	[T]	Signal transduction mechanisms	Protein-tyrosine phosphatase;; Fibronectin type III domain;; Interferon-alpha/beta receptor, fibronectin type III	Tyrosine-protein phosphatase 99A OS=Drosophila melanogaster OX=7227 GN=Ptp99A PE=2 SV=2	T	Signal transduction mechanisms	tyrosine-protein phosphatase 99A [Anoplophora glabripennis]
c56055.graph_c0	366	361	294	847	672	551	8.65	7.06	6.78	52.62	54.89	34.83	0.0024702	1.09923	up	--	--	--	--	--	--	--	--	--	--	uncharacterized protein LOC108914921 [Anoplophora glabripennis]
c55687.graph_c0	656	861	794	1642	1334	1567	14.43	15.42	15.04	27.67	26.28	32.59	6.28421e-05	1.09323	up	--	--	Cellular Component: membrane (GO:0016020);;	--	--	--	Domain of unknown function (DUF3827)	--	S	Function unknown	uncharacterized protein LOC108905425 isoform X2 [Anoplophora glabripennis]
c56426.graph_c0	1839	1311	1702	4088	2865	2886	39.44	22.84	31.79	67.61	55.88	59.04	0.00464916	1.08755	up	--	--	--	--	--	--	Transferrin	Transferrin OS=Blaberus discoidalis OX=6981 PE=1 SV=1	--	--	transferrin [Anoplophora glabripennis]
c52123.graph_c0	220	220	305	390	547	514	6.05	6.15	10.58	11.44	15.79	14.11	0.00589203	1.08733	up	[R]	General function prediction only	Molecular Function: GTPase activity (GO:0003924);; Molecular Function: protein binding (GO:0005515);; Molecular Function: GTP binding (GO:0005525);; Cellular Component: Golgi apparatus (GO:0005794);; Cellular Component: cytosol (GO:0005829);; Biological Process: exocytosis (GO:0006887);; Biological Process: retrograde vesicle-mediated transport, Golgi to ER (GO:0006890);; Biological Process: intr…	K07893|1.79712e-142|aag:AaeL_AAEL006091|K07893 Ras-related protein Rab-6A | (RefSeq) AAEL006091-PA	[U]	Intracellular trafficking, secretion, and vesicular transport	Ras family;; Ras of Complex, Roc, domain of DAPkinase;; ADP-ribosylation factor family;; Elongation factor Tu GTP binding domain;; Signal recognition particle receptor beta subunit;; 50S ribosome-binding GTPase;; Gtr1/RagA G protein conserved region	Ras-related protein Rab6 OS=Drosophila melanogaster OX=7227 GN=Rab6 PE=1 SV=1	S	Function unknown	PREDICTED: ras-related protein Rab6 isoform X2 [Tribolium castaneum]
c55618.graph_c0	2534	3523	2774	5165	7743	4292	38.97	44.19	37.06	65.95	118.24	63.66	0.00631321	1.08562	up	[T]	Signal transduction mechanisms	Molecular Function: protein tyrosine phosphatase activity (GO:0004725);; Cellular Component: cytoplasm (GO:0005737);; Biological Process: peptidyl-tyrosine dephosphorylation (GO:0035335);;	K07293|0|tca:660085|K07293 tyrosine-protein phosphatase non-receptor type 11 [EC:3.1.3.48] | (RefSeq) tyrosine-protein phosphatase corkscrew	[T]	Signal transduction mechanisms	SH2 domain;; Protein-tyrosine phosphatase;; Protein-tyrosine phosphatase;; Cytochrome oxidase c assembly	Tyrosine-protein phosphatase corkscrew OS=Drosophila melanogaster OX=7227 GN=csw PE=1 SV=2	T	Signal transduction mechanisms	tyrosine-protein phosphatase corkscrew isoform X1 [Anoplophora glabripennis]
c53174.graph_c0	928	988	1249	1485	2327	2317	24.29	21.06	29	30.55	56.48	58.08	0.00733127	1.08555	up	[E]	Amino acid transport and metabolism	Biological Process: spermine biosynthetic process (GO:0006597);; Molecular Function: spermine synthase activity (GO:0016768);;	K00802|1.42435e-128|tca:656524|K00802 spermine synthase [EC:2.5.1.22] | (RefSeq) spermine synthase	[E]	Amino acid transport and metabolism	Spermine/spermidine synthase domain;; Methyltransferase domain	--	E	Amino acid transport and metabolism	spermine synthase isoform X1 [Anoplophora glabripennis]
c51764.graph_c0	118	141	166	213	290	310	4.58	4.66	5.85	6.88	10.88	13.09	0.00791162	1.06996	up	--	--	Cellular Component: membrane (GO:0016020);;	--	--	--	Immunoglobulin domain;; Immunoglobulin I-set domain	--	--	--	uncharacterized protein LOC108916624 [Anoplophora glabripennis]
c43457.graph_c0	1035	1005	1159	1935	2394	1870	53.18	41.86	51.79	76.29	110.92	90.89	0.00138546	1.06345	up	--	--	--	--	--	--	Microtubule-Associated protein Jupiter	Microtubule-associated protein Jupiter OS=Drosophila mojavensis OX=7230 GN=Jupiter PE=3 SV=1	--	--	microtubule-associated protein Jupiter-like [Anoplophora glabripennis]
c58272.graph_c0	439	570	602	1152	1075	868	8.87	9.38	10.62	18	19.76	16.75	0.000199579	1.05967	up	--	--	Molecular Function: ubiquitin-protein transferase activity (GO:0004842);; Molecular Function: zinc ion binding (GO:0008270);; Cellular Component: integral component of membrane (GO:0016021);; Biological Process: protein ubiquitination (GO:0016567);; Molecular Function: ligase activity (GO:0016874);;	K11975|0|tca:656253|K11975 E3 ubiquitin-protein ligase RNF144 [EC:2.3.2.27] | (RefSeq) probable E3 ubiquitin-protein ligase RNF144A	[O]	Posttranslational modification, protein turnover, chaperones	IBR domain, a half RING-finger domain	Uncharacterized protein DDB_G0292642 OS=Dictyostelium discoideum OX=44689 GN=DDB_G0292642 PE=4 SV=2	O	Posttranslational modification, protein turnover, chaperones	E3 ubiquitin-protein ligase RNF144A [Anoplophora glabripennis]
c57068.graph_c0	1513	1348	1515	3002	2746	2759	10.26	7.25	7.64	13.59	14.52	16.14	0.000740912	1.05377	up	[U]	Intracellular trafficking, secretion, and vesicular transport	Biological Process: cell adhesion (GO:0007155);; Cellular Component: membrane (GO:0016020);;	--	[S]	Function unknown	Cadherin domain;; Cadherin cytoplasmic region;; Laminin G domain;; Laminin G domain;; Cadherin-like	DE-cadherin OS=Drosophila melanogaster OX=7227 GN=shg PE=1 SV=2	S	Function unknown	DE-cadherin [Anoplophora glabripennis]
c57617.graph_c0	116	130	150	195	281	275	1.72	1.56	1.93	2.23	3.79	3.89	0.00994562	1.05245	up	--	--	Cellular Component: intracellular (GO:0005622);; Biological Process: transport (GO:0006810);;	K12404|0|tca:661696|K12404 ADP-ribosylation factor-binding protein GGA | (RefSeq) ADP-ribosylation factor-binding protein GGA3	[U]	Intracellular trafficking, secretion, and vesicular transport	VHS domain;; GAT domain	Signal transducing adapter molecule 1 OS=Caenorhabditis elegans OX=6239 GN=stam-1 PE=1 SV=2	S	Function unknown	ADP-ribosylation factor-binding protein GGA1 [Anoplophora glabripennis]
c56402.graph_c0	235	281	360	679	600	395	5.15	4.97	4.77	7.96	8.18	6.1	0.00480086	1.04334	up	--	--	--	K10148|6.12109e-77|tca:657307|K10148 tumor protein p73 | (RefSeq) cellular tumor antigen p53	--	--	P53 DNA-binding domain	--	K	Transcription	cellular tumor antigen p53 [Anoplophora glabripennis]
c51924.graph_c1	541	684	648	1394	1191	990	10.99	10.23	10.08	17.11	17.14	17.54	0.000225241	1.0419	up	--	--	--	--	[S]	Function unknown	PDZ domain (Also known as DHR or GLGF);; PDZ domain	Protein lap4 OS=Drosophila melanogaster OX=7227 GN=scrib PE=1 SV=1	O	Posttranslational modification, protein turnover, chaperones	uncharacterized protein LOC108916947 isoform X1 [Anoplophora glabripennis]
c54991.graph_c0	1035	1139	1146	2197	2479	1662	28.65	25.77	28.64	45.15	59.96	42.32	0.00145553	1.03995	up	--	--	--	--	--	--	Leucine rich adaptor protein	--	S	Function unknown	1-phosphatidylinositol 3-phosphate 5-kinase-like isoform X1 [Anoplophora glabripennis]
c25441.graph_c0	1395	1508	1520	2479	2434	3466	136.86	119.58	129.77	185.11	212.76	317.76	0.00379831	1.03972	up	--	--	--	--	--	--	Microtubule-Associated protein Jupiter	--	S	Function unknown	jupiter microtubule associated homolog 1 [Anoplophora glabripennis]
c53697.graph_c1	2101	2316	2716	4406	5337	3698	51.9	46.23	57.86	84.06	120.06	86.96	0.00168352	1.03026	up	--	--	Cellular Component: membrane (GO:0016020);;	--	--	--	Zona pellucida-like domain	--	S	Function unknown	uncharacterized protein LOC111517227 [Leptinotarsa decemlineata]
c57952.graph_c0	126	152	146	250	331	216	3.37	3.2	3.01	4.21	6.39	4.5	0.00743962	1.02837	up	--	--	--	--	--	--	--	--	S	Function unknown	LOW QUALITY PROTEIN: uncharacterized protein LOC108915505 [Anoplophora glabripennis]
c56943.graph_c0	278	489	465	817	798	666	4.46	6.37	6.49	10.11	11.66	10.22	0.00145514	1.026	up	[K]	Transcription	Molecular Function: transferase activity, transferring glycosyl groups (GO:0016757);; Molecular Function: organic cyclic compound binding (GO:0097159);; Molecular Function: heterocyclic compound binding (GO:1901363);;	K10798|0|tca:655924|K10798 poly [ADP-ribose] polymerase [EC:2.4.2.30] | (RefSeq) Parp; poly-(ADP-ribose) polymerase	[KLO]	--	Poly(ADP-ribose) polymerase catalytic domain;; Poly(ADP-ribose) polymerase, regulatory domain;; Poly(ADP-ribose) polymerase and DNA-Ligase Zn-finger region;; PADR1 (NUC008) domain;; WGR domain;; BRCA1 C Terminus (BRCT) domain;; twin BRCT domain	Poly [ADP-ribose] polymerase OS=Sarcophaga peregrina OX=7386 PE=1 SV=1	S	Function unknown	poly [ADP-ribose] polymerase [Anoplophora glabripennis]
c56125.graph_c0	12432	15720	13565	21299	26965	29237	534.85	548.67	507.53	703.77	1048.31	1192.3	0.0029111	1.02228	up	--	--	--	--	--	--	--	--	--	--	uncharacterized protein LOC108911260 [Anoplophora glabripennis]
c59460.graph_c0	4983	5959	7096	11981	12865	8830	40.43	39.33	50.1	77.99	101.67	68.55	0.00141427	1.01832	up	--	--	Molecular Function: calcium ion binding (GO:0005509);; Biological Process: homophilic cell adhesion via plasma membrane adhesion molecules (GO:0007156);; Cellular Component: integral component of membrane (GO:0016021);;	--	[W]	Extracellular structures	Cadherin domain;; Concanavalin A-like lectin/glucanases superfamily	Calsyntenin-1 OS=Drosophila melanogaster OX=7227 GN=Cals PE=1 SV=2	U	Intracellular trafficking, secretion, and vesicular transport	calsyntenin-1 [Anoplophora glabripennis]
c55637.graph_c1	290	440	329	649	585	728	8.59	9.63	7.74	13.33	14.28	18.41	0.0021653	1.01777	up	--	--	Cellular Component: integral component of membrane (GO:0016021);;	--	--	--	Domain of unknown function (DUF4481)	--	S	Function unknown	uncharacterized protein LOC108903770 isoform X1 [Anoplophora glabripennis]
c51509.graph_c0	663	836	896	1629	1448	1389	20.75	21.18	25.34	39.28	41.3	41.61	0.000118238	1.01768	up	--	--	Cellular Component: integral component of membrane (GO:0016021);;	--	--	--	--	--	S	Function unknown	uncharacterized protein LOC108909160 [Anoplophora glabripennis]
c59345.graph_c0	316	370	396	734	674	611	5.27	5.04	4.98	6.15	6.15	7.21	0.000324233	1.01304	up	--	--	Cellular Component: integral component of membrane (GO:0016021);;	K15289|0|tca:658468|K15289 solute carrier family 35, member F5 | (RefSeq) Slc35f5; solute carrier family 35, member F5	[S]	Function unknown	EamA-like transporter family;; Rhomboid family;; EF-hand domain pair;; EF-hand domain;; EF hand	Rhomboid-related protein 1 OS=Caenorhabditis elegans OX=6239 GN=rom-1 PE=3 SV=2	EG	--	solute carrier family 35 member F5 [Anoplophora glabripennis]
c43589.graph_c0	680	1324	977	479	347	502	33.35	52.69	41.68	18.06	15.36	23.31	0.00674595	-1.01692	down	[I]	Lipid transport and metabolism	Molecular Function: catalytic activity (GO:0003824);;	K13239|1.8195e-90|tca:662039|K13239 peroxisomal 3,2-trans-enoyl-CoA isomerase [EC:5.3.3.8] | (RefSeq) enoyl-CoA delta isomerase 2, mitochondrial	[I]	Lipid transport and metabolism	Enoyl-CoA hydratase/isomerase;; Enoyl-CoA hydratase/isomerase	Uncharacterized protein B0272.4 OS=Caenorhabditis elegans OX=6239 GN=B0272.4 PE=3 SV=1	I	Lipid transport and metabolism	enoyl-CoA delta isomerase 2, mitochondrial [Anoplophora glabripennis]
c54750.graph_c0	672	776	829	355	351	326	18.75	17.58	20.13	7.62	8.88	8.65	0.000347412	-1.01971	down	--	--	Cellular Component: integral component of membrane (GO:0016021);;	--	--	--	--	--	S	Function unknown	uncharacterized protein LOC108914725 [Anoplophora glabripennis]
c44739.graph_c0	11892	16802	9945	6387	5301	5858	415.21	476.16	302.15	171.59	167.69	194.38	0.0038156	-1.01987	down	[CP]	Energy production and conversion ;; Inorganic ion transport and metabolism	Cellular Component: mitochondrial inner membrane (GO:0005743);; Molecular Function: NADH dehydrogenase (ubiquinone) activity (GO:0008137);; Cellular Component: integral component of membrane (GO:0016021);; Biological Process: ATP synthesis coupled electron transport (GO:0042773);; Cellular Component: respiratory chain (GO:0070469);;	K03883|4.78281e-147|tca:803820|K03883 NADH-ubiquinone oxidoreductase chain 5 [EC:1.6.5.3] | (RefSeq) ND5; NADH dehydrogenase subunit 5	[C]	Energy production and conversion	--	NADH-ubiquinone oxidoreductase chain 5 OS=Drosophila melanogaster OX=7227 GN=mt:ND5 PE=3 SV=4	C	Energy production and conversion	NADH dehydrogenase subunit 5 (mitochondrion) [Monochamus alternatus]
c53104.graph_c0	5747	9116	8245	2965	3511	3774	234.83	301.26	276.1	94.79	127.56	159.15	0.00192985	-1.02016	down	[IQR]	Lipid transport and metabolism ;; Secondary metabolites biosynthesis, transport and catabolism ;; General function prediction only	Cellular Component: membrane (GO:0016020);; Molecular Function: oxidoreductase activity (GO:0016491);; Molecular Function: lyase activity (GO:0016829);; Biological Process: oxidation-reduction process (GO:0055114);;	K12405|0|phu:Phum_PHUM414590|K12405 3-hydroxyacyl-CoA dehydrogenase / 3a,7a,12a-trihydroxy-5b-cholest-24-enoyl-CoA hydratase / enoyl-CoA hydratase 2 [EC:1.1.1.35 4.2.1.107 4.2.1.119] | (RefSeq) estradiol 17 beta-dehydrogenase, putative	[I]	Lipid transport and metabolism	short chain dehydrogenase;; MaoC like domain;; Enoyl-(Acyl carrier protein) reductase;; SCP-2 sterol transfer family;; N-terminal half of MaoC dehydratase;; KR domain;; short chain dehydrogenase	Peroxisomal multifunctional enzyme type 2 OS=Drosophila melanogaster OX=7227 GN=Mfe2 PE=1 SV=1	I	Lipid transport and metabolism	peroxisomal multifunctional enzyme type 2 isoform X3 [Anoplophora glabripennis]
c58050.graph_c3	5378	7224	5665	4152	2219	2042	168.73	184	154.65	100.29	63.17	60.93	0.00979598	-1.02145	down	[C]	Energy production and conversion	Molecular Function: pyruvate dehydrogenase (acetyl-transferring) activity (GO:0004739);; Biological Process: acetyl-CoA biosynthetic process from pyruvate (GO:0006086);; Biological Process: oxidation-reduction process (GO:0055114);;	K00162|1.41226e-97|tca:658707|K00162 pyruvate dehydrogenase E1 component beta subunit [EC:1.2.4.1] | (RefSeq) pyruvate dehydrogenase E1 component subunit beta, mitochondrial	[C]	Energy production and conversion	--	Pyruvate dehydrogenase E1 component subunit beta, mitochondrial OS=Caenorhabditis elegans OX=6239 GN=pdhb-1 PE=1 SV=2	C	Energy production and conversion	pyruvate dehydrogenase E1 component subunit beta, mitochondrial [Anoplophora glabripennis]
c55299.graph_c0	917	1363	1265	565	604	422	16.26	19.88	18.24	8.32	11.2	9.43	0.00127762	-1.02211	down	[K]	Transcription	--	--	[R]	General function prediction only	Leucine rich repeat;; Leucine Rich repeats (2 copies)	Protein artichoke OS=Drosophila melanogaster OX=7227 GN=atk PE=1 SV=2	S	Function unknown	insulin-like growth factor-binding protein complex acid labile subunit isoform X1 [Anoplophora glabripennis]
c44564.graph_c0	2557	3425	2684	1327	1145	1436	113.86	122.85	103.23	45.52	45.8	60.29	0.000896752	-1.02245	down	--	--	Cellular Component: cytoplasm (GO:0005737);; Biological Process: negative regulation of signal transduction (GO:0009968);;	--	--	--	RTP801 C-terminal region	Protein charybde OS=Drosophila melanogaster OX=7227 GN=chrb PE=2 SV=2	S	Function unknown	protein charybde [Anoplophora glabripennis]
c59408.graph_c0	324	455	313	180	158	154	7.85	8.73	6.31	3.71	3.35	3.23	0.00271297	-1.02873	down	--	--	--	--	--	--	THAP domain	--	--	--	PREDICTED: uncharacterized protein LOC103314812 isoform X1 [Tribolium castaneum]
c51974.graph_c0	1507	1819	1780	1173	580	588	48.84	47.92	50.14	29.26	17.25	18.13	0.00961536	-1.03036	down	--	--	Biological Process: lipid metabolic process (GO:0006629);; Molecular Function: phosphoric diester hydrolase activity (GO:0008081);;	--	[T]	Signal transduction mechanisms	--	--	S	Function unknown	PI-PLC X domain-containing protein 1 [Anoplophora glabripennis]
c44200.graph_c0	730	898	832	283	442	368	31.44	30.71	29.97	9.1	16.56	14.42	0.00679879	-1.03039	down	[R]	General function prediction only	Molecular Function: GTP binding (GO:0005525);; Cellular Component: intracellular (GO:0005622);; Biological Process: small GTPase mediated signal transduction (GO:0007264);;	K07918|1.15492e-112|tca:662875|K07918 Ras-related protein Rab-32 | (RefSeq) ras-related protein Rab-38	[T]	Signal transduction mechanisms	Ras family;; Ras of Complex, Roc, domain of DAPkinase;; ADP-ribosylation factor family;; Gtr1/RagA G protein conserved region	Ras-related protein Rab-32A OS=Dictyostelium discoideum OX=44689 GN=rab32A PE=1 SV=1	S	Function unknown	ras-related protein Rab-32 isoform X3 [Anoplophora glabripennis]
c51455.graph_c0	922	1087	1090	429	472	484	28.49	27.27	29.33	10.23	13.24	14.23	0.000626496	-1.03316	down	[F]	Nucleotide transport and metabolism	Cellular Component: nucleus (GO:0005634);; Cellular Component: cytoplasm (GO:0005737);; Biological Process: nucleoside metabolic process (GO:0009116);; Molecular Function: S-methyl-5-thioadenosine phosphorylase activity (GO:0017061);; Biological Process: L-methionine salvage from methylthioadenosine (GO:0019509);; Biological Process: purine-containing compound salvage (GO:0043101);;	K00772|2.09098e-123|xma:102225028|K00772 5'-methylthioadenosine phosphorylase [EC:2.4.2.28] | (RefSeq) mtap; methylthioadenosine phosphorylase	[F]	Nucleotide transport and metabolism	Phosphorylase superfamily	S-methyl-5'-thioadenosine phosphorylase OS=Anopheles gambiae OX=7165 GN=AGAP005129 PE=3 SV=4	F	Nucleotide transport and metabolism	S-methyl-5'-thioadenosine phosphorylase [Anoplophora glabripennis]
c57753.graph_c0	518	447	536	279	222	186	7.43	5.22	6.7	3.09	2.9	2.55	0.00419189	-1.03422	down	--	--	Molecular Function: metalloendopeptidase activity (GO:0004222);; Cellular Component: proteinaceous extracellular matrix (GO:0005578);; Biological Process: proteolysis (GO:0006508);; Biological Process: integrin-mediated signaling pathway (GO:0007229);; Molecular Function: zinc ion binding (GO:0008270);;	--	[O]	Posttranslational modification, protein turnover, chaperones	Reprolysin family propeptide;; ADAM-TS Spacer 1;; Reprolysin (M12B) family zinc metalloprotease;; Metallo-peptidase family M12;; Thrombospondin type 1 domain;; Metallo-peptidase family M12B Reprolysin-like;; Metallo-peptidase family M12B Reprolysin-like;; Metallo-peptidase family M12B Reprolysin-like	A disintegrin and metalloproteinase with thrombospondin motifs gon-1 OS=Caenorhabditis elegans OX=6239 GN=gon-1 PE=1 SV=3	S	Function unknown	PREDICTED: A disintegrin and metalloproteinase with thrombospondin motifs 7 isoform X1 [Tribolium castaneum]
c56229.graph_c0	3980	4921	5375	3004	2021	1448	65.46	65.08	76.29	37.67	30.65	22.35	0.00513682	-1.03567	down	[G]	Carbohydrate transport and metabolism	Molecular Function: beta-N-acetylhexosaminidase activity (GO:0004563);; Biological Process: carbohydrate metabolic process (GO:0005975);; Cellular Component: integral component of membrane (GO:0016021);;	K20730|0|tca:656027|K20730 beta-hexosaminidase Fdl [EC:3.2.1.52] | (RefSeq) Fdl; fused lobes	[G]	Carbohydrate transport and metabolism	Glycosyl hydrolase family 20, catalytic domain;; beta-acetyl hexosaminidase like	Probable beta-hexosaminidase fdl OS=Drosophila melanogaster OX=7227 GN=fdl PE=1 SV=1	G	Carbohydrate transport and metabolism	probable beta-hexosaminidase fdl [Anoplophora glabripennis]
c59315.graph_c1	2664	2102	3320	1638	981	1083	41.81	23.66	43.12	19.88	12.38	15.95	0.00940451	-1.03598	down	--	--	--	--	--	--	--	--	--	--	uncharacterized protein LOC108911485 isoform X1 [Anoplophora glabripennis]
c53987.graph_c2	143478	156503	151320	87940	63131	53487	3747.06	3291.65	3442.26	1921.59	1558.15	1368.56	0.000907296	-1.04392	down	--	--	Molecular Function: nucleic acid binding (GO:0003676);; Molecular Function: metal ion binding (GO:0046872);;	--	[R]	General function prediction only	Reverse transcriptase (RNA-dependent DNA polymerase)	Retrovirus-related Pol polyprotein from type-2 retrotransposable element R2DM OS=Drosophila melanogaster OX=7227 GN=pol PE=3 SV=1	S	Function unknown	hypothetical protein TcasGA2_TC034495 [Tribolium castaneum]
c51684.graph_c0	902	643	818	435	359	284	66.48	39.34	53.18	25.86	22.71	20.23	0.00937508	-1.05149	down	--	--	--	--	--	--	Cuticle protein CPCFC	--	--	--	uncharacterized protein LOC108913030 [Anoplophora glabripennis]
c53218.graph_c0	3862	4616	6084	1783	2475	2092	79.13	77.73	110.07	27.32	46.19	41	0.00345469	-1.05196	down	[G]	Carbohydrate transport and metabolism	Molecular Function: hydrolase activity, hydrolyzing O-glycosyl compounds (GO:0004553);; Biological Process: carbohydrate metabolic process (GO:0005975);; Cellular Component: integral component of membrane (GO:0016021);;	--	[G]	Carbohydrate transport and metabolism	Glycosyl hydrolases family 31	--	G	Carbohydrate transport and metabolism	myogenesis-regulating glycosidase isoform X3 [Anoplophora glabripennis]
c57090.graph_c0	4231	6189	4945	2792	1974	2043	102.01	120.97	102.02	49.4	40.16	45.24	0.000282964	-1.05519	down	--	--	Molecular Function: nucleotide binding (GO:0000166);; Molecular Function: nucleic acid binding (GO:0003676);;	K14947|0|tca:659398|K14947 epithelial splicing regulatory protein 1/2 | (RefSeq) RNA-binding protein fusilli	[AR]	--	RNA recognition motif. (a.k.a. RRM, RBD, or RNP domain)	RNA-binding protein fusilli OS=Drosophila melanogaster OX=7227 GN=fus PE=2 SV=1	S	Function unknown	RNA-binding protein fusilli isoform X1 [Anoplophora glabripennis]
c58923.graph_c0	851	900	1173	585	364	358	23.22	14.92	17.34	7.99	4.37	8.58	0.00267959	-1.05736	down	--	--	Molecular Function: serine-type endopeptidase inhibitor activity (GO:0004867);; Biological Process: negative regulation of endopeptidase activity (GO:0010951);; Cellular Component: integral component of membrane (GO:0016021);;	--	--	--	Laminin G domain;; Laminin G domain;; Kunitz/Bovine pancreatic trypsin inhibitor domain;; EGF-like domain;; Concanavalin A-like lectin/glucanases superfamily	Neurexin-4 OS=Drosophila melanogaster OX=7227 GN=Nrx-IV PE=1 SV=2	S	Function unknown	contactin-associated protein-like 2 isoform X2 [Anoplophora glabripennis]
c57463.graph_c0	985	1780	1403	804	512	511	31.24	43.22	39.01	19.89	14.15	15	0.00232692	-1.0608	down	--	--	--	K20840|1.86872e-114|tca:664550|K20840 MFS transporter, PCFT/HCP family, solute carrier family 46, member 3 | (RefSeq) uncharacterized LOC664550	--	--	zinc-finger of a C2HC-type	--	S	Function unknown	uncharacterized protein LOC108913016 isoform X2 [Anoplophora glabripennis]
c53836.graph_c1	1397	1354	1429	584	550	704	50.23	39.67	45.11	16.25	17.96	24.21	0.00157883	-1.06981	down	[E]	Amino acid transport and metabolism	Molecular Function: catalytic activity (GO:0003824);; Biological Process: biosynthetic process (GO:0009058);; Molecular Function: pyridoxal phosphate binding (GO:0030170);;	K00816|0|tca:655252|K00816 kynurenine---oxoglutarate transaminase / cysteine-S-conjugate beta-lyase / glutamine---phenylpyruvate transaminase [EC:2.6.1.7 4.4.1.13 2.6.1.64] | (RefSeq) kynurenine--oxoglutarate transaminase 3	[E]	Amino acid transport and metabolism	Aminotransferase class I and II	Kynurenine--oxoglutarate transaminase OS=Dictyostelium discoideum OX=44689 GN=ccbl PE=3 SV=1	E	Amino acid transport and metabolism	kynurenine--oxoglutarate transaminase 3 [Anoplophora glabripennis]
c51295.graph_c0	1857	2234	2772	1216	934	855	52.62	51.63	67.92	26.91	23.79	22.93	0.000329433	-1.07263	down	[C]	Energy production and conversion	Molecular Function: oxidoreductase activity, acting on the aldehyde or oxo group of donors, disulfide as acceptor (GO:0016624);; Biological Process: oxidation-reduction process (GO:0055114);;	K00166|0|tca:660327|K00166 2-oxoisovalerate dehydrogenase E1 component alpha subunit [EC:1.2.4.4] | (RefSeq) 2-oxoisovalerate dehydrogenase subunit alpha, mitochondrial	[C]	Energy production and conversion	Dehydrogenase E1 component;; Transketolase, thiamine diphosphate binding domain	2-oxoisovalerate dehydrogenase subunit alpha, mitochondrial OS=Caenorhabditis elegans OX=6239 GN=bckd-1A PE=1 SV=2	C	Energy production and conversion	2-oxoisovalerate dehydrogenase subunit alpha, mitochondrial [Anoplophora glabripennis]
c53197.graph_c1	877	1461	1425	417	603	576	25.85	34.96	36.55	9.47	16.15	16.16	0.00485964	-1.07351	down	[C]	Energy production and conversion	Molecular Function: oxidoreductase activity, acting on CH-OH group of donors (GO:0016614);; Molecular Function: flavin adenine dinucleotide binding (GO:0050660);; Biological Process: oxidation-reduction process (GO:0055114);;	--	[C]	Energy production and conversion	FAD linked oxidases, C-terminal domain;; FAD binding domain	--	C	Energy production and conversion	D-2-hydroxyglutarate dehydrogenase, mitochondrial-like [Anoplophora glabripennis]
c59226.graph_c0	1500	2408	3187	1096	869	1060	53.63	72.58	101.87	31.76	29.1	39.64	0.00302844	-1.07858	down	[T]	Signal transduction mechanisms	Molecular Function: kinase activity (GO:0016301);; Biological Process: phosphorylation (GO:0016310);;	K00898|5.86122e-108|tca:662090|K00898 pyruvate dehydrogenase kinase 2/3/4 [EC:2.7.11.2] | (RefSeq) pyruvate dehydrogenase (acetyl-transferring) kinase, mitochondrial	[T]	Signal transduction mechanisms	Histidine kinase-, DNA gyrase B-, and HSP90-like ATPase	[Pyruvate dehydrogenase (acetyl-transferring)] kinase, mitochondrial OS=Drosophila melanogaster OX=7227 GN=Pdk PE=2 SV=2	T	Signal transduction mechanisms	pyruvate dehydrogenase (acetyl-transferring) kinase, mitochondrial isoform X2 [Anoplophora glabripennis]
c41675.graph_c0	5945	8657	8059	2585	3306	3756	359.42	423.9	423.41	119.74	179.66	214.27	0.0021223	-1.07952	down	--	--	Cellular Component: integral component of membrane (GO:0016021);; Molecular Function: heme binding (GO:0020037);; Molecular Function: metal ion binding (GO:0046872);;	--	[C]	Energy production and conversion	--	Cytochrome b5 OS=Drosophila melanogaster OX=7227 GN=Cyt-b5 PE=2 SV=1	CI	--	cytochrome b5 [Anoplophora glabripennis]
c56729.graph_c1	6755	7891	5255	3329	2713	2713	156.87	148.63	106.44	59.56	57.16	60.53	0.00153565	-1.08153	down	[C]	Energy production and conversion	Molecular Function: dihydrolipoyllysine-residue succinyltransferase activity (GO:0004149);; Biological Process: tricarboxylic acid cycle (GO:0006099);; Cellular Component: oxoglutarate dehydrogenase complex (GO:0045252);;	K00658|9.72274e-163|tca:659954|K00658 2-oxoglutarate dehydrogenase E2 component (dihydrolipoamide succinyltransferase) [EC:2.3.1.61] | (RefSeq) dihydrolipoyllysine-residue succinyltransferase component of 2-oxoglutarate dehydrogenase complex, mitochondrial	[C]	Energy production and conversion	2-oxoacid dehydrogenases acyltransferase (catalytic domain);; Biotin-requiring enzyme;; Biotin-lipoyl like	Dihydrolipoyllysine-residue succinyltransferase component of 2-oxoglutarate dehydrogenase complex, mitochondrial OS=Dictyostelium discoideum OX=44689 GN=odhB PE=1 SV=1	C	Energy production and conversion	AGAP004055-PA-like protein [Anopheles sinensis]
c53614.graph_c0	772	636	896	294	345	363	26.3	17.79	26.62	7.87	10.51	11.63	0.00471736	-1.08266	down	[G]	Carbohydrate transport and metabolism	Cellular Component: membrane (GO:0016020);; Molecular Function: transferase activity, transferring hexosyl groups (GO:0016758);;	K00699|0|tca:660290|K00699 glucuronosyltransferase [EC:2.4.1.17] | (RefSeq) UDP-glucuronosyltransferase 1-7	[GC]	--	UDP-glucoronosyl and UDP-glucosyl transferase;; Glycosyltransferase family 28 C-terminal domain	Putative UDP-glucuronosyltransferase ugt-58 OS=Caenorhabditis elegans OX=6239 GN=ugt-58 PE=3 SV=2	S	Function unknown	UDP-glucuronosyltransferase 1-3 isoform X1 [Anoplophora glabripennis]
c55147.graph_c0	640	586	544	359	252	177	15.72	11.85	11.69	6.8	5.74	4.14	0.00922798	-1.08725	down	--	--	--	--	[TV]	--	--	--	S	Function unknown	uncharacterized protein LOC108907975 [Anoplophora glabripennis]
c50541.graph_c0	1089	1231	1292	444	544	562	58.29	53.07	60.41	17.7	26.34	28.15	0.000931004	-1.08811	down	[I]	Lipid transport and metabolism	Molecular Function: hydrolase activity (GO:0016787);;	K18399|2.29732e-54|tca:657706|K18399 valacyclovir hydrolase [EC:3.1.-.-] | (RefSeq) valacyclovir hydrolase	[R]	General function prediction only	alpha/beta hydrolase fold;; Alpha/beta hydrolase of unknown function (DUF1057);; alpha/beta hydrolase fold	--	S	Function unknown	valacyclovir hydrolase-like [Anoplophora glabripennis]
c21863.graph_c0	1385	1606	1780	848	631	592	81.25	76.33	90.74	38.15	33.3	32.77	0.000142785	-1.09257	down	--	--	--	--	--	--	Thyroid hormone-inducible hepatic protein Spot 14	--	S	Function unknown	mid1-interacting protein 1-like [Anoplophora glabripennis]
c57112.graph_c1	1489	2176	2919	867	793	1103	59.33	73.93	97.82	25.36	27.09	41.18	0.00407917	-1.09647	down	--	--	Biological Process: fatty acid metabolic process (GO:0006631);; Cellular Component: membrane (GO:0016020);;	--	[I]	Lipid transport and metabolism	GNS1/SUR4 family	Elongation of very long chain fatty acids protein AAEL008004 OS=Aedes aegypti OX=7159 GN=AAEL008004 PE=2 SV=2	I	Lipid transport and metabolism	elongation of very long chain fatty acids protein AAEL008004-like [Anoplophora glabripennis]
c52669.graph_c1	6868	7286	6112	3661	2502	2707	265.69	231.59	217.23	104.64	89.74	96.56	0.000632381	-1.09652	down	[E]	Amino acid transport and metabolism	Molecular Function: L-aspartate:2-oxoglutarate aminotransferase activity (GO:0004069);; Biological Process: cellular amino acid metabolic process (GO:0006520);; Biological Process: biosynthetic process (GO:0009058);; Molecular Function: pyridoxal phosphate binding (GO:0030170);; Molecular Function: L-phenylalanine:2-oxoglutarate aminotransferase activity (GO:0080130);;	K14454|0|tca:658043|K14454 aspartate aminotransferase, cytoplasmic [EC:2.6.1.1] | (RefSeq) aspartate aminotransferase, cytoplasmic	[E]	Amino acid transport and metabolism	Aminotransferase class I and II	Probable aspartate aminotransferase, cytoplasmic OS=Caenorhabditis elegans OX=6239 GN=got-1.2 PE=3 SV=1	E	Amino acid transport and metabolism	aspartate aminotransferase, cytoplasmic [Anoplophora glabripennis]
c47955.graph_c0	1503	1888	1685	732	797	649	79.82	86.63	75.86	33.94	36.61	35.32	0.000134114	-1.0966	down	[O]	Posttranslational modification, protein turnover, chaperones	Molecular Function: transferase activity (GO:0016740);;	K00799|3.92118e-79|tca:654964|K00799 glutathione S-transferase [EC:2.5.1.18] | (RefSeq) glutathione S-transferase 1	[O]	Posttranslational modification, protein turnover, chaperones	Glutathione S-transferase, N-terminal domain;; Glutathione S-transferase, C-terminal domain;; Glutathione S-transferase, N-terminal domain;; Glutathione S-transferase, C-terminal domain;; Glutathione S-transferase, N-terminal domain	Glutathione S-transferase 1 OS=Manduca sexta OX=7130 GN=GST1 PE=2 SV=1	O	Posttranslational modification, protein turnover, chaperones	glutathione S-transferase 1 isoform X1 [Anoplophora glabripennis]
c51259.graph_c0	11462	11876	12741	5788	4975	4870	378.07	317.88	365.83	146.93	148.82	152.7	5.09166e-05	-1.09781	down	[R]	General function prediction only	Molecular Function: translation initiation factor activity (GO:0003743);; Biological Process: translational initiation (GO:0006413);; Molecular Function: kinase activity (GO:0016301);; Biological Process: phosphorylation (GO:0016310);;	K13137|0|tca:658063|K13137 serine-threonine kinase receptor-associated protein | (RefSeq) serine-threonine kinase receptor-associated protein	[I]	Lipid transport and metabolism	WD domain, G-beta repeat;; Anaphase-promoting complex subunit 4 WD40 domain	Serine-threonine kinase receptor-associated protein OS=Dictyostelium discoideum OX=44689 GN=strap PE=3 SV=1	S	Function unknown	serine-threonine kinase receptor-associated protein [Anoplophora glabripennis]
c47219.graph_c0	425	642	517	310	193	179	8.89	10.91	9.42	5	3.67	3.57	0.00197357	-1.10083	down	--	--	--	--	--	--	Domain of unknown function (DUF4371)	--	S	Function unknown	zinc finger MYM-type protein 1-like [Anoplophora glabripennis]
c54116.graph_c0	19527	23814	15750	11116	7033	7600	806.22	797.53	565.76	352.54	262.76	298.15	0.00234142	-1.10124	down	[C]	Energy production and conversion	Biological Process: carbohydrate metabolic process (GO:0005975);; Biological Process: malate metabolic process (GO:0006108);; Molecular Function: L-malate dehydrogenase activity (GO:0030060);; Biological Process: oxidation-reduction process (GO:0055114);;	K00026|1.17283e-173|tca:662339|K00026 malate dehydrogenase [EC:1.1.1.37] | (RefSeq) malate dehydrogenase, mitochondrial	[C]	Energy production and conversion	lactate/malate dehydrogenase, alpha/beta C-terminal domain;; lactate/malate dehydrogenase, NAD binding domain;; 3-beta hydroxysteroid dehydrogenase/isomerase family	Probable malate dehydrogenase, mitochondrial OS=Caenorhabditis elegans OX=6239 GN=mdh-2 PE=3 SV=1	C	Energy production and conversion	malate dehydrogenase, mitochondrial [Anoplophora glabripennis]
c56095.graph_c0	4545	5605	6353	3199	2042	1887	148.69	158.01	164.28	69.96	51.31	56.09	0.000658346	-1.10155	down	--	--	Cellular Component: lysosomal membrane (GO:0005765);; Cellular Component: integral component of membrane (GO:0016021);; Molecular Function: oxidoreductase activity (GO:0016491);; Cellular Component: late endosome membrane (GO:0031902);; Molecular Function: metal ion binding (GO:0046872);; Biological Process: oxidation-reduction process (GO:0055114);;	--	[C]	Energy production and conversion	Eukaryotic cytochrome b561	Putative cytochrome b561 OS=Caenorhabditis elegans OX=6239 GN=F55H2.5 PE=3 SV=1	O	Posttranslational modification, protein turnover, chaperones	cytochrome b reductase 1 isoform X1 [Anoplophora glabripennis]
c56131.graph_c0	5860	7519	7370	4712	2411	1923	126.73	145.33	131.78	71.52	40.72	48.09	0.00953618	-1.10201	down	--	--	Molecular Function: ubiquitin-protein transferase activity (GO:0004842);; Molecular Function: zinc ion binding (GO:0008270);; Cellular Component: integral component of membrane (GO:0016021);; Biological Process: protein ubiquitination (GO:0016567);; Molecular Function: ligase activity (GO:0016874);;	K11972|0|tca:100142087|K11972 E3 ubiquitin-protein ligase RNF19A [EC:2.3.2.27] | (RefSeq) E3 ubiquitin-protein ligase RNF19A	[O]	Posttranslational modification, protein turnover, chaperones	IBR domain, a half RING-finger domain	Uncharacterized protein DDB_G0292642 OS=Dictyostelium discoideum OX=44689 GN=DDB_G0292642 PE=4 SV=2	O	Posttranslational modification, protein turnover, chaperones	E3 ubiquitin-protein ligase RNF19A isoform X2 [Anoplophora glabripennis]
c55820.graph_c0	502	1025	650	358	294	265	11.37	18.75	12.69	6.35	6.22	5.73	0.00267178	-1.10477	down	[P]	Inorganic ion transport and metabolism	Molecular Function: solute:proton antiporter activity (GO:0015299);; Cellular Component: integral component of membrane (GO:0016021);; Biological Process: hydrogen ion transmembrane transport (GO:1902600);;	--	[P]	Inorganic ion transport and metabolism	Sodium/hydrogen exchanger family	--	P	Inorganic ion transport and metabolism	sodium/hydrogen exchanger 9B1 isoform X1 [Anoplophora glabripennis]
c52576.graph_c0	6796	8770	9021	3653	3480	3328	218.32	228.71	252.21	90.34	101.37	101.68	1.24804e-05	-1.10492	down	[R]	General function prediction only	Biological Process: ethanol oxidation (GO:0006069);; Molecular Function: zinc ion binding (GO:0008270);; Molecular Function: S-(hydroxymethyl)glutathione dehydrogenase activity (GO:0051903);;	K00121|0|tca:654905|K00121 S-(hydroxymethyl)glutathione dehydrogenase / alcohol dehydrogenase [EC:1.1.1.284 1.1.1.1] | (RefSeq) Fdh; formaldehyde dehydrogenase	[Q]	Secondary metabolites biosynthesis, transport and catabolism	Alcohol dehydrogenase GroES-like domain;; Zinc-binding dehydrogenase	Alcohol dehydrogenase class-3 OS=Drosophila melanogaster OX=7227 GN=Fdh PE=1 SV=3	C	Energy production and conversion	alcohol dehydrogenase class-3 [Anoplophora glabripennis]
c48083.graph_c0	257096	355818	189143	133301	104365	106894	14331.2	16071.8	9167.09	5697.37	5239.64	5630	0.0036945	-1.10764	down	[C]	Energy production and conversion	Cellular Component: mitochondrial inner membrane (GO:0005743);; Biological Process: mitochondrial electron transport, ubiquinol to cytochrome c (GO:0006122);; Molecular Function: ubiquinol-cytochrome-c reductase activity (GO:0008121);; Molecular Function: electron carrier activity (GO:0009055);; Cellular Component: respiratory chain complex III (GO:0045275);; Molecular Function: metal ion binding…	K00412|0|tca:803817|K00412 ubiquinol-cytochrome c reductase cytochrome b subunit | (RefSeq) CYTB; cytochrome b	[C]	Energy production and conversion	--	Cytochrome b OS=Drosophila melanogaster OX=7227 GN=mt:Cyt-b PE=3 SV=2	C	Energy production and conversion	cytochrome b (mitochondrion) [Monochamus alternatus]
c55529.graph_c0	4324	5615	5596	1940	2825	1780	73.43	75.47	83.02	25.29	44.78	28.36	0.00193463	-1.10866	down	[F]	Nucleotide transport and metabolism	Molecular Function: uridine phosphorylase activity (GO:0004850);; Cellular Component: cytoplasm (GO:0005737);; Biological Process: nucleoside metabolic process (GO:0009116);; Biological Process: nucleotide catabolic process (GO:0009166);;	K00757|0|tca:656823|K00757 uridine phosphorylase [EC:2.4.2.3] | (RefSeq) uridine phosphorylase 1	[F]	Nucleotide transport and metabolism	Phosphorylase superfamily	Uridine and thymidine phosphorylase OS=Caenorhabditis elegans OX=6239 GN=upp-1 PE=1 SV=2	F	Nucleotide transport and metabolism	uridine phosphorylase 1 isoform X1 [Anoplophora glabripennis]
c51517.graph_c0	841	819	619	382	242	363	70.42	54.98	45.09	23.13	17.47	28.39	0.00629816	-1.11315	down	--	--	--	--	--	--	--	--	--	--	uncharacterized protein LOC108912430 [Anoplophora glabripennis]
c57560.graph_c0	541	635	601	348	160	256	124.46	120.25	123.63	60.05	32.37	55.36	0.00545292	-1.11451	down	--	--	Cellular Component: integral component of membrane (GO:0016021);; Biological Process: oxidation-reduction process (GO:0055114);; Molecular Function: fatty-acyl-CoA reductase (alcohol-forming) activity (GO:0080019);;	K13356|8.8626e-15|tca:655283|K13356 alcohol-forming fatty acyl-CoA reductase [EC:1.2.1.84] | (RefSeq) putative fatty acyl-CoA reductase CG5065	[I]	Lipid transport and metabolism	Male sterility protein	Putative fatty acyl-CoA reductase CG5065 OS=Drosophila melanogaster OX=7227 GN=CG5065 PE=3 SV=1	S	Function unknown	fatty acyl-CoA reductase wat-like [Anoplophora glabripennis]
c55725.graph_c0	717	1388	1040	379	429	484	17.65	27.5	22.57	7.29	9.52	11.38	0.00225673	-1.12143	down	--	--	Biological Process: transport (GO:0006810);; Cellular Component: integral component of membrane (GO:0016021);;	K13354|1.72174e-114|tca:660427|K13354 solute carrier family 25 (peroxisomal adenine nucleotide transporter), member 17 | (RefSeq) peroxisomal membrane protein PMP34	[C]	Energy production and conversion	Mitochondrial carrier protein	Mitochondrial substrate carrier family protein Q OS=Dictyostelium discoideum OX=44689 GN=mcfQ PE=2 SV=1	S	Function unknown	peroxisomal membrane protein PMP34 [Anoplophora glabripennis]
c59021.graph_c0	10679	12150	16087	3788	6424	5873	195.24	179.6	252.47	49.88	99.21	97.69	0.00686532	-1.12156	down	--	--	--	--	[I]	Lipid transport and metabolism	Domain of unknown function (DUF1943);; Lipoprotein amino terminal region;; Domain of Unknown Function (DUF1081)	Apolipophorins OS=Locusta migratoria OX=7004 PE=1 SV=2	S	Function unknown	uncharacterized protein LOC108907336 [Anoplophora glabripennis]
c58608.graph_c0	1135	1490	1035	696	458	411	18.03	19.33	14.61	8.45	6.85	6.07	0.00177544	-1.12385	down	[G]	Carbohydrate transport and metabolism	Molecular Function: hydrolase activity (GO:0016787);;	K05546|0|tca:655389|K05546 alpha 1,3-glucosidase [EC:3.2.1.84] | (RefSeq) neutral alpha-glucosidase C	[GMO]	--	Glycosyl hydrolases family 31;; Galactose mutarotase-like	Neutral alpha-glucosidase AB OS=Dictyostelium discoideum OX=44689 GN=modA PE=3 SV=1	G	Carbohydrate transport and metabolism	neutral alpha-glucosidase C isoform X3 [Anoplophora glabripennis]
c58842.graph_c0	1216	1705	1837	671	667	644	15.17	17.4	20.61	6.75	7.91	7.93	5.558e-05	-1.12545	down	[T]	Signal transduction mechanisms	--	--	--	--	Pyruvate phosphate dikinase, PEP/pyruvate binding domain;; PEP-utilising enzyme, mobile domain	--	G	Carbohydrate transport and metabolism	uncharacterized protein LOC108908020 [Anoplophora glabripennis]
c50989.graph_c0	6529	5373	11616	3547	3574	2729	107.45	71.9	166.48	45.09	53.79	43.25	0.00946396	-1.1308	down	--	--	Molecular Function: nucleotide binding (GO:0000166);; Molecular Function: RNA binding (GO:0003723);; Cellular Component: nucleus (GO:0005634);; Biological Process: RNA processing (GO:0006396);; Cellular Component: intracellular ribonucleoprotein complex (GO:0030529);;	K18733|7.84519e-177|tca:664329|K18733 la-related protein 6 | (RefSeq) la-related protein 6	[R]	General function prediction only	La domain;; SUZ-C motif	La protein homolog OS=Drosophila melanogaster OX=7227 GN=La PE=1 SV=2	S	Function unknown	la-related protein 6 [Anoplophora glabripennis]
c50389.graph_c0	5358	6089	6203	2213	2366	2777	183.26	169.04	184.64	58.26	73.33	90.28	0.000255165	-1.13306	down	[C]	Energy production and conversion	Molecular Function: magnesium ion binding (GO:0000287);; Molecular Function: isocitrate dehydrogenase (NADP+) activity (GO:0004450);; Biological Process: tricarboxylic acid cycle (GO:0006099);; Biological Process: isocitrate metabolic process (GO:0006102);; Molecular Function: NAD binding (GO:0051287);;	K00031|0|tca:659013|K00031 isocitrate dehydrogenase [EC:1.1.1.42] | (RefSeq) isocitrate dehydrogenase [NADP], mitochondrial	[C]	Energy production and conversion	Isocitrate/isopropylmalate dehydrogenase	Isocitrate dehydrogenase [NADP], mitochondrial OS=Dictyostelium discoideum OX=44689 GN=idhM PE=3 SV=1	C	Energy production and conversion	isocitrate dehydrogenase [NADP], mitochondrial [Anoplophora glabripennis]
c55620.graph_c0	1008	1029	1384	548	459	432	13.39	10.69	16.1	5.82	5.71	5.77	0.000224237	-1.13451	down	--	--	Molecular Function: transcription factor activity, sequence-specific DNA binding (GO:0003700);; Biological Process: regulation of transcription, DNA-templated (GO:0006355);; Molecular Function: sequence-specific DNA binding (GO:0043565);;	K09428|0|tca:655028|K09428 E74-like factor 1/2/4 | (RefSeq) ecdysone-induced protein 74EF	[K]	Transcription	Ets-domain	Ecdysone-induced protein 74EF isoform A OS=Drosophila melanogaster OX=7227 GN=Eip74EF PE=2 SV=2	K	Transcription	PREDICTED: ecdysone-induced protein 74EF isoform A isoform X1 [Tribolium castaneum]
c55351.graph_c0	516	819	793	244	350	273	16.64	20.92	21.87	5.56	10.41	7.26	0.00164084	-1.14014	down	[I]	Lipid transport and metabolism	Molecular Function: transporter activity (GO:0005215);; Molecular Function: carboxylic ester hydrolase activity (GO:0052689);;	--	[R]	General function prediction only	Carboxylesterase family;; alpha/beta hydrolase fold;; Prolyl oligopeptidase family;; Carboxylesterase family	Esterase B1 OS=Culex pipiens OX=7175 GN=B1 PE=3 SV=1	I	Lipid transport and metabolism	esterase B1 [Anoplophora glabripennis]
c58660.graph_c1	2996	4526	4826	1424	1998	1609	77.35	94.88	108.43	28.32	46.84	39.56	0.000971215	-1.14062	down	--	;;	Biological Process: phospholipid biosynthetic process (GO:0008654);; Cellular Component: integral component of membrane (GO:0016021);; Molecular Function: phosphotransferase activity, for other substituted phosphate groups (GO:0016780);;	K00993|0|tca:663101|K00993 ethanolaminephosphotransferase [EC:2.7.8.1] | (RefSeq) ethanolaminephosphotransferase 1-like	[I]	Lipid transport and metabolism	CDP-alcohol phosphatidyltransferase	Uncharacterized CDP-alcohol phosphatidyltransferase class-I family protein 2 OS=Dictyostelium discoideum OX=44689 GN=captB PE=3 SV=1	I	Lipid transport and metabolism	ethanolaminephosphotransferase 1-like [Anoplophora glabripennis]
c59422.graph_c2	12891	14151	11703	8125	3610	4697	460.23	410.72	364.11	223.48	116.91	159.39	0.00522528	-1.1526	down	[C]	Energy production and conversion	Molecular Function: aconitate hydratase activity (GO:0003994);; Cellular Component: mitochondrion (GO:0005739);; Biological Process: tricarboxylic acid cycle (GO:0006099);; Molecular Function: metal ion binding (GO:0046872);; Molecular Function: 4 iron, 4 sulfur cluster binding (GO:0051539);;	K01681|0|tca:663732|K01681 aconitate hydratase [EC:4.2.1.3] | (RefSeq) probable aconitate hydratase, mitochondrial	[CE]	--	Aconitase C-terminal domain	Probable aconitate hydratase, mitochondrial OS=Caenorhabditis elegans OX=6239 GN=aco-2 PE=3 SV=2	C	Energy production and conversion	probable aconitate hydratase, mitochondrial [Anoplophora glabripennis]
c52423.graph_c0	4518	6006	7734	2215	2629	2559	158.67	171.21	236.34	59.85	83.65	85.41	0.000500367	-1.15322	down	[I]	Lipid transport and metabolism	Biological Process: metabolic process (GO:0008152);; Molecular Function: transferase activity, transferring acyl groups other than amino-acyl groups (GO:0016747);;	K07509|0|tca:664130|K07509 acetyl-CoA acyltransferase [EC:2.3.1.16] | (RefSeq) trifunctional enzyme subunit beta, mitochondrial	[I]	Lipid transport and metabolism	Thiolase, N-terminal domain;; Thiolase, C-terminal domain;; Beta-ketoacyl synthase, N-terminal domain	Uncharacterized protein B0303.3 OS=Caenorhabditis elegans OX=6239 GN=B0303.3 PE=3 SV=1	I	Lipid transport and metabolism	daf22 [Monochamus alternatus]
c59029.graph_c0	7782	9142	7959	3838	3326	3182	135.83	129.5	123.68	49.42	51.17	51.79	1.62272e-05	-1.15435	down	--	--	Molecular Function: calcium ion binding (GO:0005509);; Cellular Component: integral component of membrane (GO:0016021);; Biological Process: transmembrane transport (GO:0055085);;	K15105|0|tca:659073|K15105 solute carrier family 25 (mitochondrial aspartate/glutamate transporter), member 12/13 | (RefSeq) calcium-binding mitochondrial carrier protein Aralar1	[C]	Energy production and conversion	Mitochondrial carrier protein;; EF hand;; EF-hand domain pair;; EF-hand domain pair;; EF-hand domain;; EF hand;; PX domain;; Vps5 C terminal like	Calcium-binding mitochondrial carrier protein Aralar1 OS=Drosophila melanogaster OX=7227 GN=aralar1 PE=2 SV=1	S	Function unknown	calcium-binding mitochondrial carrier protein Aralar1 isoform X1 [Anoplophora glabripennis]
c59579.graph_c0	268	299	366	113	120	148	12.15	9.98	12.94	3.48	4.66	7.09	0.00161187	-1.15605	down	--	--	--	--	--	--	--	--	S	Function unknown	putative RNA-directed DNA polymerase from transposon BS-like Protein [Tribolium castaneum]
c53554.graph_c0	833	1095	1047	473	383	371	12.17	13.03	13.31	5.33	5.09	5.19	1.63986e-05	-1.15703	down	[K]	Transcription	Cellular Component: membrane (GO:0016020);;	--	[R]	General function prediction only	Leucine rich repeat;; Leucine Rich repeats (2 copies);; Leucine rich repeats (6 copies);; Leucine-rich repeat;; Leucine Rich Repeat;; Leucine Rich repeat	Toll-like receptor Tollo OS=Drosophila melanogaster OX=7227 GN=Tollo PE=1 SV=1	S	Function unknown	insulin-like growth factor-binding protein complex acid labile subunit [Anoplophora glabripennis]
c59510.graph_c0	350	483	358	211	131	150	10.38	13.17	9.92	4.35	2.94	3.13	0.000945865	-1.16327	down	--	--	--	--	[R]	General function prediction only	Zinc-finger double domain	--	S	Function unknown	zinc finger protein 845-like [Anoplophora glabripennis]
c56017.graph_c0	15972	29701	25785	8917	10109	9564	632.16	954.48	882.9	265.09	359.92	359.36	0.000308856	-1.16347	down	[HR]	Coenzyme transport and metabolism ;; General function prediction only	Molecular Function: cis-stilbene-oxide hydrolase activity (GO:0033961);;	K10719|0|tca:659305|K10719 juvenile hormone epoxide hydrolase | (RefSeq) Tcjheh-r5; juvenile hormone epoxide hydrolase-like protein 5	[R]	General function prediction only	Epoxide hydrolase N terminus;; alpha/beta hydrolase fold	Juvenile hormone epoxide hydrolase 1 OS=Ctenocephalides felis OX=7515 GN=EH1 PE=1 SV=3	S	Function unknown	juvenile hormone epoxide hydrolase 1 [Anoplophora glabripennis]
c20482.graph_c0	888	1005	1240	292	513	453	50.89	46.62	61.74	12.82	26.44	24.5	0.00527753	-1.16578	down	--	--	--	--	[A]	RNA processing and modification	Leucine-rich repeat;; Leucine Rich repeats (2 copies);; Leucine rich repeat	--	S	Function unknown	leucine-rich melanocyte differentiation-associated protein-like isoform X1 [Anoplophora glabripennis]
c59499.graph_c1	1237	1193	1248	507	543	468	31.44	24.23	27.37	9.7	12.48	11.2	0.000182296	-1.16674	down	--	--	Molecular Function: transporter activity (GO:0005215);; Biological Process: transport (GO:0006810);; Cellular Component: integral component of membrane (GO:0016021);;	K09884|7.10745e-132|tca:663053|K09884 aquaporin rerated protein, invertebrate | (RefSeq) aquaporin-12	--	--	Major intrinsic protein	Aquaporin-11 OS=Milnesium tardigradum OX=46460 GN=AQP11 PE=2 SV=2	U	Intracellular trafficking, secretion, and vesicular transport	aquaporin-11 [Anoplophora glabripennis]
c54385.graph_c0	814	1217	1918	600	576	409	58.48	72.45	124.12	32.7	36.56	27.15	0.00483495	-1.16815	down	--	--	Molecular Function: kinase activity (GO:0016301);; Biological Process: phosphorylation (GO:0016310);;	K00898|5.98519e-139|tca:662090|K00898 pyruvate dehydrogenase kinase 2/3/4 [EC:2.7.11.2] | (RefSeq) pyruvate dehydrogenase (acetyl-transferring) kinase, mitochondrial	[T]	Signal transduction mechanisms	Mitochondrial branched-chain alpha-ketoacid dehydrogenase kinase	[Pyruvate dehydrogenase (acetyl-transferring)] kinase, mitochondrial OS=Drosophila melanogaster OX=7227 GN=Pdk PE=2 SV=2	T	Signal transduction mechanisms	pyruvate dehydrogenase (acetyl-transferring) kinase, mitochondrial isoform X1 [Anoplophora glabripennis]
c59267.graph_c0	1561	1753	1947	702	506	919	26.65	28.22	29.16	8.96	7.84	15.27	0.00210549	-1.17672	down	[O]	Posttranslational modification, protein turnover, chaperones	--	--	[E]	Amino acid transport and metabolism	Trypsin;; Sushi repeat (SCR repeat)	Modular serine protease OS=Drosophila melanogaster OX=7227 GN=modSP PE=1 SV=2	O	Posttranslational modification, protein turnover, chaperones	uncharacterized protein LOC108909690 [Anoplophora glabripennis]
c51346.graph_c0	3536	4508	4723	2269	1395	1556	142.63	147.59	165.96	70.44	50.97	59.62	9.98755e-05	-1.17742	down	[G]	Carbohydrate transport and metabolism	Molecular Function: adenosine kinase activity (GO:0004001);; Biological Process: purine ribonucleoside salvage (GO:0006166);; Biological Process: AMP biosynthetic process (GO:0006167);; Biological Process: phosphorylation (GO:0016310);;	K00856|7.29532e-56|tca:659475|K00856 adenosine kinase [EC:2.7.1.20] | (RefSeq) adenosine kinase	[G]	Carbohydrate transport and metabolism	pfkB family carbohydrate kinase	Adenosine kinase OS=Dictyostelium discoideum OX=44689 GN=adk PE=3 SV=2	G	Carbohydrate transport and metabolism	adenosine kinase [Anoplophora glabripennis]
c57300.graph_c0	14047	23945	22717	7878	9439	6825	255.14	293.99	286.29	89.71	120.47	114.19	0.000293485	-1.1796	down	[C]	Energy production and conversion	Molecular Function: DNA binding (GO:0003677);; Molecular Function: biotin carboxylase activity (GO:0004075);; Molecular Function: pyruvate carboxylase activity (GO:0004736);; Molecular Function: ATP binding (GO:0005524);; Biological Process: pyruvate metabolic process (GO:0006090);; Biological Process: gluconeogenesis (GO:0006094);; Molecular Function: biotin binding (GO:0009374);; Molecular Func…	K01958|0|tca:662701|K01958 pyruvate carboxylase [EC:6.4.1.1] | (RefSeq) pyruvate carboxylase, mitochondrial	[C]	Energy production and conversion	Carbamoyl-phosphate synthase L chain, ATP binding domain;; Conserved carboxylase domain;; Biotin carboxylase, N-terminal domain;; Biotin carboxylase C-terminal domain;; HMGL-like;; Biotin-requiring enzyme;; D-ala D-ala ligase C-terminus;; ATP-grasp domain;; ATP-grasp domain;; Biotin-lipoyl like;; RimK-like ATP-grasp domain	Pyruvate carboxylase 1 OS=Caenorhabditis elegans OX=6239 GN=pyc-1 PE=1 SV=1	C	Energy production and conversion	pyruvate carboxylase, mitochondrial [Anoplophora glabripennis]
c58580.graph_c0	2754	1826	3217	1315	964	949	45.23	22.03	48.43	16.12	14.03	13.81	0.0035864	-1.18241	down	[T]	Signal transduction mechanisms	Molecular Function: protein kinase activity (GO:0004672);; Molecular Function: ATP binding (GO:0005524);; Biological Process: protein phosphorylation (GO:0006468);;	K08875|0|tca:661173|K08875 nuclear receptor-binding protein | (RefSeq) nuclear receptor-binding protein homolog	[T]	Signal transduction mechanisms	Protein kinase domain;; Protein tyrosine kinase	Nuclear receptor-binding protein homolog OS=Drosophila melanogaster OX=7227 GN=Madm PE=1 SV=1	S	Function unknown	nuclear receptor-binding protein homolog [Anoplophora glabripennis]
c55235.graph_c0	1424	2078	2005	1040	517	674	33.21	41.13	42.11	21.17	19.64	18.04	0.00101512	-1.18729	down	[G]	Carbohydrate transport and metabolism	Cellular Component: membrane (GO:0016020);;	K08220|9.84667e-165|tca:107397418|K08220 MFS transporter, FLVCR family, feline leukemia virus subgroup C receptor-related protein | (RefSeq) uncharacterized MFS-type transporter C09D4.1-like	[R]	General function prediction only	Major Facilitator Superfamily;; Organic Anion Transporter Polypeptide (OATP) family;; Sugar (and other) transporter	Uncharacterized MFS-type transporter C09D4.1 OS=Caenorhabditis elegans OX=6239 GN=C09D4.1 PE=3 SV=2	U	Intracellular trafficking, secretion, and vesicular transport	uncharacterized MFS-type transporter C09D4.1-like [Anoplophora glabripennis]
c53130.graph_c0	3937	4202	5918	1168	2350	2004	88.52	77.01	115.82	22.39	50.55	44.25	0.00981066	-1.19115	down	--	--	--	--	--	--	Protein of unknown function (DUF229);; Sulfatase	--	S	Function unknown	uncharacterized protein LOC108904033 [Anoplophora glabripennis]
c58332.graph_c0	462	339	498	191	181	158	11.49	8.92	10.34	4.77	5.63	4.35	0.00193513	-1.19447	down	[G]	Carbohydrate transport and metabolism	Molecular Function: ribokinase activity (GO:0004747);; Biological Process: D-ribose metabolic process (GO:0006014);; Biological Process: carbohydrate phosphorylation (GO:0046835);;	K00852|8.19702e-129|tca:662716|K00852 ribokinase [EC:2.7.1.15] | (RefSeq) ribokinase	[G]	Carbohydrate transport and metabolism	pfkB family carbohydrate kinase;; Phosphomethylpyrimidine kinase	Ribokinase OS=Leishmania major OX=5664 GN=LMJF_27_0420 PE=1 SV=1	G	Carbohydrate transport and metabolism	ribokinase-like isoform X1 [Anoplophora glabripennis]
c56024.graph_c2	2479	2876	1851	1214	885	840	139.77	135.69	95.34	59.05	48.65	51.03	0.000969184	-1.19747	down	--	--	--	--	[C]	Energy production and conversion	Leucine-rich repeat;; Leucine Rich repeats (2 copies);; Leucine rich repeat	--	S	Function unknown	leucine-rich melanocyte differentiation-associated protein-like isoform X1 [Anoplophora glabripennis]
c50221.graph_c0	328	423	695	218	156	196	21.57	22.62	39.67	10.84	9.19	12.16	0.00304949	-1.20096	down	[Q]	Secondary metabolites biosynthesis, transport and catabolism	--	K17362|5.2388e-49|tca:103314417|K17362 acyl-coenzyme A thioesterase 13 [EC:3.1.2.-] | (RefSeq) acyl-coenzyme A thioesterase 13	[R]	General function prediction only	Thioesterase superfamily	Putative esterase F42H10.6 OS=Caenorhabditis elegans OX=6239 GN=F42H10.6 PE=1 SV=2	Q	Secondary metabolites biosynthesis, transport and catabolism	acyl-coenzyme A thioesterase 13 [Anoplophora glabripennis]
c49408.graph_c0	7386	10519	11347	4471	3381	3757	285.16	329.52	381.15	132.74	118.13	137.69	1.09956e-05	-1.20238	down	--	--	Molecular Function: growth factor activity (GO:0008083);;	--	--	--	PTN/MK heparin-binding protein family, C-terminal domain	--	S	Function unknown	midkine-A-like [Anoplophora glabripennis]
c50770.graph_c0	2256	2733	2468	710	1100	1120	89.55	87.68	86.69	22.1	40	42.55	0.00170416	-1.20391	down	[CIR]	Energy production and conversion ;; Lipid transport and metabolism ;; General function prediction only	Molecular Function: FMN binding (GO:0010181);; Molecular Function: oxidoreductase activity (GO:0016491);; Biological Process: oxidation-reduction process (GO:0055114);;	K11517|1.72908e-87|tca:659094|K11517 (S)-2-hydroxy-acid oxidase [EC:1.1.3.15] | (RefSeq) hydroxyacid oxidase 1	[C]	Energy production and conversion	FMN-dependent dehydrogenase;; FMN-dependent dehydrogenase;; IMP dehydrogenase / GMP reductase domain;; Conserved region in glutamate synthase	Hydroxyacid oxidase OS=Dictyostelium discoideum OX=44689 GN=haox PE=3 SV=1	C	Energy production and conversion	hydroxyacid oxidase 1 [Anoplophora glabripennis]
c56630.graph_c0	22255	24628	22655	15719	6561	6300	1010.43	898.45	895.73	545	266.06	266.41	0.0087984	-1.20405	down	[FE]	Nucleotide transport and metabolism ;; Amino acid transport and metabolism	Molecular Function: magnesium ion binding (GO:0000287);; Molecular Function: ribose phosphate diphosphokinase activity (GO:0004749);; Biological Process: ribonucleoside monophosphate biosynthetic process (GO:0009156);; Biological Process: nucleotide biosynthetic process (GO:0009165);; Molecular Function: kinase activity (GO:0016301);; Biological Process: phosphorylation (GO:0016310);;	K00948|2.26638e-150|tca:658841|K00948 ribose-phosphate pyrophosphokinase [EC:2.7.6.1] | (RefSeq) ribose-phosphate pyrophosphokinase 1	[FE]	--	Phosphoribosyl synthetase-associated domain;; Phosphoribosyl transferase domain;; Cyclophilin type peptidyl-prolyl cis-trans isomerase/CLD;; N-terminal domain of ribose phosphate pyrophosphokinase	Ribose-phosphate pyrophosphokinase A OS=Dictyostelium discoideum OX=44689 GN=prsA PE=1 SV=1	F	Nucleotide transport and metabolism	ribose-phosphate pyrophosphokinase 1 isoform X1 [Anoplophora glabripennis]
c54498.graph_c0	264	475	443	112	167	175	10.33	16.31	15.39	2.97	5.62	5.89	0.00401954	-1.2086	down	--	--	Molecular Function: DNA binding (GO:0003677);; Molecular Function: DNA primase activity (GO:0003896);; Biological Process: DNA replication, synthesis of RNA primer (GO:0006269);; Molecular Function: metal ion binding (GO:0046872);; Molecular Function: 4 iron, 4 sulfur cluster binding (GO:0051539);; Cellular Component: primosome complex (GO:1990077);;	K02685|2.17107e-106|tca:660563|K02685 DNA primase large subunit [EC:2.7.7.-] | (RefSeq) DNA primase large subunit	[L]	Replication, recombination and repair	Eukaryotic and archaeal DNA primase, large subunit;; Eukaryotic and archaeal DNA primase, large subunit	DNA primase large subunit OS=Drosophila melanogaster OX=7227 GN=DNApol-alpha60 PE=1 SV=2	L	Replication, recombination and repair	DNA primase large subunit [Anoplophora glabripennis]
c51155.graph_c0	2579	2989	3263	1338	1066	1118	99.95	93.74	109.77	39.76	37.32	41.07	3.92151e-06	-1.20944	down	[I]	Lipid transport and metabolism	Molecular Function: acyl-CoA dehydrogenase activity (GO:0003995);; Molecular Function: flavin adenine dinucleotide binding (GO:0050660);; Biological Process: oxidation-reduction process (GO:0055114);;	K09478|0|tca:660569|K09478 short/branched chain acyl-CoA dehydrogenase [EC:1.3.99.12] | (RefSeq) short/branched chain specific acyl-CoA dehydrogenase, mitochondrial	[I]	Lipid transport and metabolism	Acyl-CoA dehydrogenase, C-terminal domain;; Acyl-CoA dehydrogenase, N-terminal domain;; Acyl-CoA dehydrogenase, middle domain;; Acyl-CoA dehydrogenase, C-terminal domain	Probable short/branched chain specific acyl-CoA dehydrogenase OS=Dictyostelium discoideum OX=44689 GN=acadsb PE=3 SV=1	I	Lipid transport and metabolism	short/branched chain specific acyl-CoA dehydrogenase, mitochondrial isoform X2 [Anoplophora glabripennis]
c50287.graph_c0	3490	3397	5044	1525	1709	1455	175.96	140.76	213.84	61.45	75.17	72.92	0.000240168	-1.221	down	[G]	Carbohydrate transport and metabolism	Cellular Component: membrane (GO:0016020);;	K09884|1.08179e-79|tca:659318|K09884 aquaporin rerated protein, invertebrate | (RefSeq) uncharacterized LOC659318	[G]	Carbohydrate transport and metabolism	Major intrinsic protein	Aquaporin AQPAe.a OS=Aedes aegypti OX=7159 GN=AAEL003512 PE=2 SV=2	G	Carbohydrate transport and metabolism	aquaporin-like isoform X1 [Anoplophora glabripennis]
c54395.graph_c0	2135	3045	3160	1390	1021	867	26.97	31.39	35.06	13.67	12.33	10.59	4.66759e-05	-1.22514	down	--	--	--	--	[R]	General function prediction only	SAM domain (Sterile alpha motif);; SAM domain (Sterile alpha motif)	--	S	Function unknown	caskin-1 isoform X2 [Leptinotarsa decemlineata]
c58115.graph_c0	4551	5260	5179	2793	1776	1423	71.06	66.92	70.42	33.69	25.33	21.53	0.000413946	-1.22543	down	[O]	Posttranslational modification, protein turnover, chaperones	Molecular Function: ATP binding (GO:0005524);; Biological Process: proteolysis (GO:0006508);; Molecular Function: peptidase activity (GO:0008233);;	K03544|0|tca:658404|K03544 ATP-dependent Clp protease ATP-binding subunit ClpX | (RefSeq) ATP-dependent Clp protease ATP-binding subunit clpX-like, mitochondrial	[O]	Posttranslational modification, protein turnover, chaperones	AAA domain (Cdc48 subfamily);; ATPase family associated with various cellular activities (AAA);; C-terminal, D2-small domain, of ClpB protein;; Sigma-54 interaction domain;; AAA domain (dynein-related subfamily);; Magnesium chelatase, subunit ChlI	ATP-dependent protease ATPase subunit HslU2 OS=Trypanosoma brucei brucei (strain 927/4 GUTat10.1) OX=185431 GN=HslU2 PE=3 SV=1	O	Posttranslational modification, protein turnover, chaperones	ATP-dependent Clp protease ATP-binding subunit clpX-like, mitochondrial isoform X1 [Anoplophora glabripennis]
c54661.graph_c0	394	558	663	203	206	215	11.06	12.72	16.22	4.39	5.25	5.75	0.000146965	-1.22651	down	[C]	Energy production and conversion	Molecular Function: succinate-semialdehyde dehydrogenase [NAD(P)+] activity (GO:0009013);; Biological Process: gamma-aminobutyric acid catabolic process (GO:0009450);; Biological Process: oxidation-reduction process (GO:0055114);;	K00139|0|tca:661308|K00139 succinate-semialdehyde dehydrogenase [EC:1.2.1.24] | (RefSeq) glutarate-semialdehyde dehydrogenase DavD	[C]	Energy production and conversion	Aldehyde dehydrogenase family	Aldehyde dehydrogenase OS=Enchytraeus buchholzi OX=34589 GN=ALDH PE=2 SV=1	C	Energy production and conversion	uncharacterized protein LOC108911319 [Anoplophora glabripennis]
c55169.graph_c0	3126	4913	5938	1784	1948	1641	101.72	132.52	171.17	44.12	58.06	51.46	0.000162898	-1.22757	down	[QV]	Secondary metabolites biosynthesis, transport and catabolism ;; Defense mechanisms	Molecular Function: oxidoreductase activity (GO:0016491);; Molecular Function: metal ion binding (GO:0046872);;	K15003|0|tca:664295|K15003 cytochrome P450 family 9 [EC:1.14.-.-] | (RefSeq) CYP9Z4, GLEAN_06444; cytochrome P450 9Z4	[Q]	Secondary metabolites biosynthesis, transport and catabolism	Cytochrome P450	Cytochrome P450 9e2 OS=Blattella germanica OX=6973 GN=CYP9E2 PE=2 SV=1	Q	Secondary metabolites biosynthesis, transport and catabolism	cytochrome P450 9e2-like [Anoplophora glabripennis]
c55571.graph_c1	2967	3598	4087	1208	1401	1511	73.3	75.56	87.53	24.45	32.95	40.76	7.70974e-05	-1.23064	down	[IQ]	Lipid transport and metabolism ;; Secondary metabolites biosynthesis, transport and catabolism	Molecular Function: catalytic activity (GO:0003824);;	--	[I]	Lipid transport and metabolism	AMP-binding enzyme;; AMP-binding enzyme C-terminal domain	Probable 4-coumarate--CoA ligase 1 OS=Dictyostelium discoideum OX=44689 GN=4cl1 PE=3 SV=1	IQ	--	probable 4-coumarate--CoA ligase 3 [Anoplophora glabripennis]
c56670.graph_c0	1635	1807	1971	789	807	515	39.59	35.09	40.91	14.38	17.47	11.7	0.000142364	-1.24422	down	[O]	Posttranslational modification, protein turnover, chaperones	Molecular Function: peptidase activity (GO:0008233);; Molecular Function: metal ion binding (GO:0046872);;	K08002|0|tca:660850|K08002 matrix metalloproteinase-24 (membrane-inserted) [EC:3.4.24.-] | (RefSeq) Mmp-3; matrix metalloproteinase 3	[OW]	--	Matrixin;; Hemopexin	Matrix metalloproteinase-2 OS=Drosophila melanogaster OX=7227 GN=Mmp2 PE=2 SV=1	O	Posttranslational modification, protein turnover, chaperones	matrix metalloproteinase-2-like isoform X1 [Anoplophora glabripennis]
c57862.graph_c0	1598	2260	2019	864	761	647	36.73	42.3	40.37	15.31	15.91	14.19	3.59102e-06	-1.24623	down	--	--	--	--	--	--	Transposase IS4;; Transposase IS4;; Transposase IS4	--	S	Function unknown	piggyBac transposable element-derived protein 2-like [Leptinotarsa decemlineata]
c59635.graph_c0	15061	11893	17230	5119	6851	5219	155.32	107.85	164.68	42.06	69.68	53.55	0.000977399	-1.24679	down	[O]	Posttranslational modification, protein turnover, chaperones	Molecular Function: serine-type peptidase activity (GO:0008236);;	--	[E]	Amino acid transport and metabolism	Transposase;; Trypsin	Spaetzle-processing enzyme OS=Drosophila melanogaster OX=7227 GN=SPE PE=1 SV=2	O	Posttranslational modification, protein turnover, chaperones	uncharacterized protein LOC108917267 [Anoplophora glabripennis]
c55813.graph_c2	196402	197681	204470	87525	78928	67716	2064.11	1647.02	1861.44	793.47	814.92	718.36	9.14656e-06	-1.24922	down	--	--	--	--	--	--	--	--	S	Function unknown	UNKNOWN [Stylonychia lemnae]
c47862.graph_c0	2044	2647	3369	874	1415	762	93.29	97.97	133.74	30.64	58.33	32.95	0.00260036	-1.2515	down	[K]	Transcription	--	--	[R]	General function prediction only	Leucine rich repeat;; Leucine rich repeats (6 copies);; Leucine Rich repeats (2 copies);; Leucine-rich repeat;; Leucine Rich Repeat	Toll-like receptor 6 OS=Drosophila melanogaster OX=7227 GN=Toll-6 PE=1 SV=1	S	Function unknown	decorin-like [Anoplophora glabripennis]
c57239.graph_c0	1499	1359	2089	745	659	518	48.09	36.04	57.96	18.79	18.77	16.14	0.000303428	-1.2533	down	--	--	Cellular Component: integral component of membrane (GO:0016021);; Molecular Function: transferase activity, transferring glycosyl groups (GO:0016757);;	K21032|0|tca:662815|K21032 beta-1,4-glucuronyltransferase 1 [EC:2.4.1.-] | (RefSeq) beta-1,4-glucuronyltransferase 1	[G]	Carbohydrate transport and metabolism	Glycosyl-transferase for dystroglycan	Glycosyltransferase-like protein gnt14 OS=Dictyostelium discoideum OX=44689 GN=gnt14 PE=2 SV=1	S	Function unknown	beta-1,4-glucuronyltransferase 1 isoform X2 [Anoplophora glabripennis]
c52507.graph_c0	35209	38799	47332	9270	22330	14042	297.34	264.6	345	60.14	170.58	115.45	0.00950271	-1.25483	down	[UW]	Intracellular trafficking, secretion, and vesicular transport ;; Extracellular structures	--	K06237|0|tca:663310|K06237 collagen, type IV, alpha | (RefSeq) collagen alpha-2(IV) chain	[W]	Extracellular structures	Collagen triple helix repeat (20 copies);; C-terminal tandem repeated domain in type 4 procollagen	Collagen alpha-1(IV) chain OS=Caenorhabditis elegans OX=6239 GN=emb-9 PE=1 SV=5	S	Function unknown	collagen alpha-1(IV) chain, partial [Anoplophora glabripennis]
c55513.graph_c0	449	598	744	193	294	189	9.18	8.67	11.88	4.01	4.02	3.13	0.00139095	-1.25495	down	[U]	Intracellular trafficking, secretion, and vesicular transport	--	K17495|0|tca:103312732|K17495 CUB and sushi domain-containing protein | (RefSeq) sushi, von Willebrand factor type A, EGF and pentraxin domain-containing protein 1	[T]	Signal transduction mechanisms	von Willebrand factor type A domain;; Sushi repeat (SCR repeat);; Pentaxin family;; HYR domain;; EGF-like domain;; Putative ephrin-receptor like;; Concanavalin A-like lectin/glucanases superfamily;; von Willebrand factor type A domain	Neurogenic locus Notch protein OS=Drosophila melanogaster OX=7227 GN=N PE=1 SV=3	S	Function unknown	sushi, von Willebrand factor type A, EGF and pentraxin domain-containing protein 1-like [Leptinotarsa decemlineata]
c56214.graph_c0	2163	2707	3238	1008	985	1087	43.57	44.04	55.79	16.08	18.54	20.88	1.3507e-05	-1.25966	down	[I]	Lipid transport and metabolism	Biological Process: fatty acid metabolic process (GO:0006631);; Molecular Function: oxidoreductase activity, acting on the CH-CH group of donors (GO:0016627);; Biological Process: oxidation-reduction process (GO:0055114);;	K00232|0|tca:658001|K00232 acyl-CoA oxidase [EC:1.3.3.6] | (RefSeq) peroxisomal acyl-coenzyme A oxidase 3	[IQ]	--	Acyl-CoA oxidase;; Acyl-CoA dehydrogenase, middle domain;; Acyl-CoA dehydrogenase, C-terminal domain	Probable peroxisomal acyl-coenzyme A oxidase 1.5 OS=Caenorhabditis elegans OX=6239 GN=acox-1.5 PE=3 SV=1	I	Lipid transport and metabolism	peroxisomal acyl-coenzyme A oxidase 3 isoform X1 [Anoplophora glabripennis]
c50862.graph_c0	822	1472	1481	269	535	575	53.54	77.95	84.28	13.38	31.33	35.28	0.00974128	-1.26493	down	[IQR]	Lipid transport and metabolism ;; Secondary metabolites biosynthesis, transport and catabolism ;; General function prediction only	Molecular Function: oxidoreductase activity (GO:0016491);; Biological Process: oxidation-reduction process (GO:0055114);;	K03331|1.20528e-80|tca:659735|K03331 L-xylulose reductase [EC:1.1.1.10] | (RefSeq) L-xylulose reductase	[Q]	Secondary metabolites biosynthesis, transport and catabolism	short chain dehydrogenase;; Enoyl-(Acyl carrier protein) reductase;; KR domain;; NAD dependent epimerase/dehydratase family;; Enoyl-(Acyl carrier protein) reductase	L-xylulose reductase OS=Caenorhabditis elegans OX=6239 GN=dhs-21 PE=1 SV=2	S	Function unknown	L-xylulose reductase [Anoplophora glabripennis]
c52267.graph_c0	408	592	592	134	242	214	16.94	18.18	19.15	3.98	7.97	9.21	0.00252703	-1.26888	down	--	--	Molecular Function: G-protein coupled receptor activity (GO:0004930);; Biological Process: cell surface receptor signaling pathway (GO:0007166);; Biological Process: G-protein coupled receptor signaling pathway (GO:0007186);; Cellular Component: integral component of membrane (GO:0016021);; Molecular Function: dopamine binding (GO:0035240);; Molecular Function: L-DOPA binding (GO:0072544);; Molec…	K08470|3.48692e-168|tca:658302|K08470 Ocular albinism type 1 protein | (RefSeq) G-protein coupled receptor 143	--	--	Ocular albinism type 1 protein;; 7 transmembrane receptor (Secretin family)	Cyclic AMP receptor-like protein A OS=Dictyostelium discoideum OX=44689 GN=crlA PE=2 SV=1	U	Intracellular trafficking, secretion, and vesicular transport	G-protein coupled receptor 143 [Anoplophora glabripennis]
c55638.graph_c0	714	724	827	243	305	306	66.73	54.49	68.98	17.07	25.95	28.14	0.000173585	-1.27886	down	--	--	--	--	[R]	General function prediction only	Reverse transcriptase (RNA-dependent DNA polymerase);; Transcription activator MBF2	Probable RNA-directed DNA polymerase from transposon BS OS=Drosophila melanogaster OX=7227 GN=RTase PE=2 SV=1	S	Function unknown	hypothetical protein B7P43_G12677 [Cryptotermes secundus]
c47273.graph_c0	473	366	494	224	110	182	15.68	9.84	14.24	5.71	3.3	5.73	0.0033851	-1.27912	down	[QV]	Secondary metabolites biosynthesis, transport and catabolism ;; Defense mechanisms	Molecular Function: monooxygenase activity (GO:0004497);; Molecular Function: oxidoreductase activity, acting on paired donors, with incorporation or reduction of molecular oxygen (GO:0016705);; Molecular Function: metal ion binding (GO:0046872);;	K10722|9.99278e-177|tca:658665|K10722 ecdysteroid 2-hydroxylase | (RefSeq) CYP315A1; cytochrome P450 315a1, mitochondrial	[Q]	Secondary metabolites biosynthesis, transport and catabolism	Cytochrome P450	Cytochrome P450 315a1, mitochondrial OS=Drosophila melanogaster OX=7227 GN=sad PE=2 SV=1	Q	Secondary metabolites biosynthesis, transport and catabolism	cytochrome P450 315a1, mitochondrial [Anoplophora glabripennis]
c56399.graph_c0	1023	1495	1082	789	314	284	18.06	21.45	16.61	10.75	5.04	4.8	0.00943537	-1.28367	down	--	--	--	--	--	--	--	--	S	Function unknown	uncharacterized protein LOC108917570 isoform X1 [Anoplophora glabripennis]
c56781.graph_c0	11187	9531	16019	3648	6495	3592	789.43	547.29	1018.08	199	422.49	243.57	0.00535168	-1.28376	down	[O]	Posttranslational modification, protein turnover, chaperones	Molecular Function: hydrolase activity (GO:0016787);;	--	[E]	Amino acid transport and metabolism	Trypsin	Serine protease easter OS=Drosophila melanogaster OX=7227 GN=ea PE=1 SV=3	O	Posttranslational modification, protein turnover, chaperones	uncharacterized protein LOC108917267 [Anoplophora glabripennis]
c40718.graph_c0	243	458	380	181	108	115	22.81	34.73	30.96	12.94	9.03	10.09	0.000660128	-1.2855	down	--	--	Biological Process: proton transport (GO:0015992);; Cellular Component: vacuolar proton-transporting V-type ATPase complex (GO:0016471);; Molecular Function: hydrolase activity, acting on acid anhydrides, catalyzing transmembrane movement of substances (GO:0016820);; Biological Process: transmembrane transport (GO:0055085);;	K02152|1.69528e-27|tca:658882|K02152 V-type H+-transporting ATPase subunit G | (RefSeq) V-type proton ATPase subunit G	[C]	Energy production and conversion	Vacuolar (H+)-ATPase G subunit	V-type proton ATPase subunit G OS=Drosophila melanogaster OX=7227 GN=Vha13 PE=3 SV=1	C	Energy production and conversion	V-type proton ATPase subunit G-like [Anoplophora glabripennis]
c53839.graph_c0	2888	2128	2568	1433	792	742	80.83	48.58	63	31.02	20.27	19.92	0.00232622	-1.28569	down	--	--	Biological Process: transport (GO:0006810);; Cellular Component: membrane (GO:0016020);; Cellular Component: cell junction (GO:0030054);;	--	--	--	Innexin	Innexin inx7 OS=Drosophila melanogaster OX=7227 GN=Inx7 PE=2 SV=1	S	Function unknown	innexin inx7 isoform X1 [Anoplophora glabripennis]
c58270.graph_c0	53774	65256	103349	20262	38618	22488	1029.47	1017.79	1711.52	304.98	675.07	416.78	0.00559159	-1.28781	down	[E]	Amino acid transport and metabolism	Molecular Function: catalytic activity (GO:0003824);; Biological Process: polyamine biosynthetic process (GO:0006596);;	K01581|3.49485e-127|tca:656985|K01581 ornithine decarboxylase [EC:4.1.1.17] | (RefSeq) ornithine decarboxylase 1	[E]	Amino acid transport and metabolism	Pyridoxal-dependent decarboxylase, pyridoxal binding domain	Ornithine decarboxylase 1 OS=Drosophila melanogaster OX=7227 GN=Odc1 PE=2 SV=3	E	Amino acid transport and metabolism	ornithine decarboxylase 1-like [Anoplophora glabripennis]
c57726.graph_c0	3105	4811	4265	1703	1222	1617	250.73	301.17	296.83	118.43	81.48	127	1.22088e-05	-1.28838	down	--	--	--	--	--	--	Domain of unknown function (DUF4505)	UPF0598 protein CG30010 OS=Drosophila melanogaster OX=7227 GN=CG30010 PE=2 SV=1	S	Function unknown	UPF0598 protein CG30010 isoform X1 [Anoplophora glabripennis]
c52956.graph_c0	3446	4202	4894	2144	1474	1136	53.38	52.8	64.98	25.09	20.73	19.54	0.000129545	-1.2895	down	--	--	--	--	[K]	Transcription	Helix-loop-helix DNA-binding domain	Protein WBSCR14 homolog OS=Caenorhabditis elegans OX=6239 GN=mml-1 PE=1 SV=2	S	Function unknown	MLX-interacting protein isoform X1 [Anoplophora glabripennis]
c58070.graph_c0	3159	4061	3711	1324	1357	1404	79.15	81.82	76.74	24.84	33.7	38.14	1.7456e-06	-1.28983	down	[E]	Amino acid transport and metabolism	--	--	[H]	Coenzyme transport and metabolism	Flavin containing amine oxidoreductase;; NAD(P)-binding Rossmann-like domain;; FAD binding domain	Protein anon-37Cs (Fragment) OS=Drosophila simulans OX=7240 GN=anon-37Cs PE=3 SV=1	S	Function unknown	spermine oxidase [Anoplophora glabripennis]
c38746.graph_c0	2440	2848	4029	626	1379	1374	134.22	126.9	192.64	26.4	68.34	71.45	0.0099585	-1.29143	down	[IQR]	Lipid transport and metabolism ;; Secondary metabolites biosynthesis, transport and catabolism ;; General function prediction only	Molecular Function: oxidoreductase activity (GO:0016491);; Biological Process: oxidation-reduction process (GO:0055114);;	--	[R]	General function prediction only	Enoyl-(Acyl carrier protein) reductase;; short chain dehydrogenase;; KR domain	Dehydrogenase/reductase SDR family member 4 OS=Caenorhabditis elegans OX=6239 GN=dhrs-4 PE=1 SV=1	S	Function unknown	uncharacterized protein LOC108904377 [Anoplophora glabripennis]
c59077.graph_c1	77140	94094	50227	38402	30696	15767	707.3	714.03	359.98	313.53	278.93	178.28	0.00816628	-1.29308	down	--	--	--	K17751|0|tca:659358|K17751 myosin heavy chain 6/7 | (RefSeq) Mhc1; myosin heavy chain 1	[Z]	Cytoskeleton	Myosin head (motor domain);; Myosin tail;; IQ calmodulin-binding motif;; Fatty acid desaturase;; Cytochrome b5-like Heme/Steroid binding domain;; Myosin tail;; Myosin head (motor domain);; Myosin N-terminal SH3-like domain	Myosin heavy chain, muscle OS=Drosophila melanogaster OX=7227 GN=Mhc PE=1 SV=4	Z	Cytoskeleton	myosin heavy chain, muscle isoform X23 [Leptinotarsa decemlineata]
c48142.graph_c0	1353	1368	1307	765	347	434	42.99	35.12	35.92	18.52	9.64	13.07	0.00125971	-1.29732	down	[P]	Inorganic ion transport and metabolism	Biological Process: sulfate transport (GO:0008272);; Molecular Function: sulfate transmembrane transporter activity (GO:0015116);; Cellular Component: membrane (GO:0016020);; Biological Process: transmembrane transport (GO:0055085);;	K14708|0|tca:657432|K14708 solute carrier family 26 (sodium-independent sulfate anion transporter), member 11 | (RefSeq) sodium-independent sulfate anion transporter-like	[P]	Inorganic ion transport and metabolism	Sulfate permease family	Sulfate permease family protein 3 OS=Caenorhabditis elegans OX=6239 GN=sulp-3 PE=2 SV=3	P	Inorganic ion transport and metabolism	sodium-independent sulfate anion transporter-like isoform X2 [Anoplophora glabripennis]
c58384.graph_c0	3127	3631	2946	1661	962	1070	62.64	59.19	50.4	24.43	17.38	20.37	0.000124413	-1.29746	down	--	--	Molecular Function: G-protein coupled receptor activity (GO:0004930);; Biological Process: signal transduction (GO:0007165);; Cellular Component: membrane (GO:0016020);;	K04585|2.22194e-110|tca:103312672|K04585 parathyroid hormone receptor 1 | (RefSeq) pthrl1; parathyroid hormone/parathyroid hormone-related peptide receptor	[T]	Signal transduction mechanisms	7 transmembrane receptor (Secretin family)	Diuretic hormone receptor OS=Acheta domesticus OX=6997 PE=2 SV=1	U	Intracellular trafficking, secretion, and vesicular transport	parathyroid hormone/parathyroid hormone-related peptide receptor [Anoplophora glabripennis]
c50750.graph_c0	3347	4631	4763	1497	1789	1413	149.02	166.91	184.24	51.16	71.55	60.09	9.02428e-06	-1.29919	down	--	--	Cellular Component: integral component of membrane (GO:0016021);;	K10703|5.02753e-95|tca:656186|K10703 very-long-chain (3R)-3-hydroxyacyl-CoA dehydratase [EC:4.2.1.134] | (RefSeq) very-long-chain (3R)-3-hydroxyacyl-CoA dehydratase hpo-8	[R]	General function prediction only	Protein tyrosine phosphatase-like protein, PTPLA	Very-long-chain (3R)-3-hydroxyacyl-CoA dehydratase hpo-8 OS=Caenorhabditis elegans OX=6239 GN=hpo-8 PE=3 SV=2	S	Function unknown	very-long-chain (3R)-3-hydroxyacyl-CoA dehydratase 2 [Anoplophora glabripennis]
c53804.graph_c0	5586	7427	9367	4504	1782	2154	103.85	110.98	153.71	60.38	28.94	37.15	0.00350426	-1.29943	down	[I]	Lipid transport and metabolism	Biological Process: metabolic process (GO:0008152);; Cellular Component: integral component of membrane (GO:0016021);; Molecular Function: ligase activity (GO:0016874);;	K01897|0|tca:662595|K01897 long-chain acyl-CoA synthetase [EC:6.2.1.3] | (RefSeq) long-chain-fatty-acid--CoA ligase 4	[I]	Lipid transport and metabolism	AMP-binding enzyme;; AMP-binding enzyme C-terminal domain	Fatty acyl-CoA synthetase B OS=Dictyostelium discoideum OX=44689 GN=fcsB PE=2 SV=1	I	Lipid transport and metabolism	long-chain-fatty-acid--CoA ligase 4 isoform X3 [Anoplophora glabripennis]
c56500.graph_c1	5434	7591	10040	2005	2927	3394	217.13	204.9	343.32	56.7	98.96	115.52	0.00163512	-1.30095	down	[I]	Lipid transport and metabolism	Molecular Function: acyl-CoA dehydrogenase activity (GO:0003995);; Molecular Function: flavin adenine dinucleotide binding (GO:0050660);; Biological Process: oxidation-reduction process (GO:0055114);;	K00249|0|tca:659081|K00249 acyl-CoA dehydrogenase [EC:1.3.8.7] | (RefSeq) probable medium-chain specific acyl-CoA dehydrogenase, mitochondrial	[I]	Lipid transport and metabolism	Acyl-CoA dehydrogenase, C-terminal domain;; Acyl-CoA dehydrogenase, N-terminal domain;; Acyl-CoA dehydrogenase, middle domain;; Acyl-CoA dehydrogenase, C-terminal domain	Probable medium-chain specific acyl-CoA dehydrogenase, mitochondrial OS=Drosophila melanogaster OX=7227 GN=CG12262 PE=2 SV=1	I	Lipid transport and metabolism	probable medium-chain specific acyl-CoA dehydrogenase, mitochondrial [Anoplophora glabripennis]
c53002.graph_c0	2251	2646	2902	870	960	1052	68.23	64.81	76.51	20.37	26.69	30.32	1.36794e-05	-1.30165	down	[I]	Lipid transport and metabolism	Molecular Function: methylcrotonoyl-CoA carboxylase activity (GO:0004485);; Cellular Component: mitochondrial matrix (GO:0005759);; Biological Process: leucine metabolic process (GO:0006551);; Biological Process: regulation of eclosion (GO:0007563);;	K01969|0|tca:659023|K01969 3-methylcrotonyl-CoA carboxylase beta subunit [EC:6.4.1.4] | (RefSeq) probable methylcrotonoyl-CoA carboxylase beta chain, mitochondrial	[EI]	--	Carboxyl transferase domain;; Carboxyl transferase domain;; Carboxyl transferase domain	Probable methylcrotonoyl-CoA carboxylase beta chain, mitochondrial OS=Drosophila melanogaster OX=7227 GN=l(2)04524 PE=2 SV=1	I	Lipid transport and metabolism	probable methylcrotonoyl-CoA carboxylase beta chain, mitochondrial [Anoplophora glabripennis]
c57319.graph_c1	1907	1940	2944	977	813	741	48.76	40.95	66.05	19.89	19.32	18.64	5.77148e-05	-1.30468	down	--	--	--	--	--	--	Ecdysteroid kinase;; Protein of unknown function (DUF1679);; Phosphotransferase enzyme family	--	S	Function unknown	uncharacterized protein LOC108907575 [Anoplophora glabripennis]
c56133.graph_c0	4484	7219	3868	1329	1812	2495	226.4	293.28	165.37	51.8	83.4	115.65	0.00507421	-1.30726	down	[G]	Carbohydrate transport and metabolism	Molecular Function: sedoheptulose-7-phosphate:D-glyceraldehyde-3-phosphate glyceronetransferase activity (GO:0004801);; Cellular Component: cytoplasm (GO:0005737);; Biological Process: carbohydrate metabolic process (GO:0005975);; Biological Process: pentose-phosphate shunt (GO:0006098);;	K00616|0|tca:656816|K00616 transaldolase [EC:2.2.1.2] | (RefSeq) probable transaldolase	[G]	Carbohydrate transport and metabolism	Transaldolase/Fructose-6-phosphate aldolase	Probable transaldolase OS=Drosophila melanogaster OX=7227 GN=Taldo PE=2 SV=2	G	Carbohydrate transport and metabolism	transaldolase [Anoplophora glabripennis]
c56438.graph_c1	5580	4626	7173	2207	2082	2190	156.13	105.11	174.7	47.59	52.88	58.34	0.00011169	-1.30926	down	[QV]	Secondary metabolites biosynthesis, transport and catabolism ;; Defense mechanisms	Cellular Component: membrane (GO:0016020);; Molecular Function: oxidoreductase activity (GO:0016491);; Molecular Function: metal ion binding (GO:0046872);;	K14999|0|tca:659050|K14999 cytochrome P450 family 6 [EC:1.14.-.-] | (RefSeq) CYP6BK2; cytochrome P450 6BK2	[Q]	Secondary metabolites biosynthesis, transport and catabolism	Cytochrome P450	Probable cytochrome P450 6a14 OS=Drosophila melanogaster OX=7227 GN=Cyp6a14 PE=3 SV=2	Q	Secondary metabolites biosynthesis, transport and catabolism	probable cytochrome P450 6a14 [Anoplophora glabripennis]
c57445.graph_c0	3889	4672	5152	1666	1566	1804	47.25	46.14	54.93	15.7	17.39	21.45	1.84749e-06	-1.31477	down	[G]	Carbohydrate transport and metabolism	Cellular Component: integral component of membrane (GO:0016021);; Molecular Function: transmembrane transporter activity (GO:0022857);; Biological Process: transmembrane transport (GO:0055085);;	--	[R]	General function prediction only	Major Facilitator Superfamily;; Sugar (and other) transporter;; Dihydrodipicolinate synthetase family	Putative transporter svop-1 OS=Caenorhabditis elegans OX=6239 GN=svop-1 PE=3 SV=5	G	Carbohydrate transport and metabolism	synaptic vesicle 2-related protein [Anoplophora glabripennis]
c53125.graph_c0	4833	6698	6385	1939	2455	2122	140.51	158.6	162.44	44.76	65.35	60.88	1.04269e-05	-1.31675	down	[G]	Carbohydrate transport and metabolism	Biological Process: carbohydrate metabolic process (GO:0005975);; Molecular Function: kinase activity (GO:0016301);; Biological Process: phosphorylation (GO:0016310);; Molecular Function: phosphotransferase activity, alcohol group as acceptor (GO:0016773);;	--	[G]	Carbohydrate transport and metabolism	FGGY family of carbohydrate kinases, N-terminal domain;; FGGY family of carbohydrate kinases, C-terminal domain;; FGGY family of carbohydrate kinases, C-terminal domain	--	G	Carbohydrate transport and metabolism	FGGY carbohydrate kinase domain-containing protein [Anoplophora glabripennis]
c49049.graph_c0	10935	13837	16266	2599	6704	5300	210.72	217.28	273.63	38.53	117.65	97.81	0.00864867	-1.31857	down	[H]	Coenzyme transport and metabolism	Biological Process: cellular protein modification process (GO:0006464);; Molecular Function: transferase activity (GO:0016740);;	K10105|7.09287e-79|tca:656237|K10105 lipoyltransferase 1 | (RefSeq) lipoyltransferase 1, mitochondrial	[H]	Coenzyme transport and metabolism	--	--	H	Coenzyme transport and metabolism	lipoyltransferase 1, mitochondrial [Anoplophora glabripennis]
c53394.graph_c0	1448	914	1729	549	422	554	74.57	36.86	85.61	23.38	20.62	30.65	0.00189213	-1.32207	down	[Q]	Secondary metabolites biosynthesis, transport and catabolism	Biological Process: fatty acid alpha-oxidation (GO:0001561);; Molecular Function: phytanoyl-CoA dioxygenase activity (GO:0048244);;	K00477|7.92864e-107|tca:658138|K00477 phytanoyl-CoA hydroxylase [EC:1.14.11.18] | (RefSeq) phytanoyl-CoA dioxygenase, peroxisomal	[I]	Lipid transport and metabolism	Phytanoyl-CoA dioxygenase (PhyH)	Probable phytanoyl-CoA dioxygenase OS=Caenorhabditis elegans OX=6239 GN=ZK550.6 PE=3 SV=2	Q	Secondary metabolites biosynthesis, transport and catabolism	probable phytanoyl-CoA dioxygenase [Anoplophora glabripennis]
c53550.graph_c0	2712	2917	3021	883	863	1405	98.06	84.84	94.95	26.5	30.33	50.17	0.000587755	-1.32234	down	--	--	Molecular Function: transferase activity, transferring glycosyl groups (GO:0016757);;	K00699|8.60921e-24|tca:660793|K00699 glucuronosyltransferase [EC:2.4.1.17] | (RefSeq) UDP-glucuronosyltransferase 2B10-like	[GC]	--	UDP-glucoronosyl and UDP-glucosyl transferase	--	S	Function unknown	uncharacterized protein LOC108904558 [Anoplophora glabripennis]
c52059.graph_c0	5363	7021	5286	3390	1528	1685	159.72	169.14	134.96	78.35	40.52	47.55	0.00116578	-1.32671	down	[T]	Signal transduction mechanisms	Molecular Function: cystathionine beta-synthase activity (GO:0004122);; Cellular Component: cytoplasm (GO:0005737);; Biological Process: cysteine biosynthetic process from serine (GO:0006535);; Biological Process: cysteine biosynthetic process via cystathionine (GO:0019343);;	K01697|0|tca:656954|K01697 cystathionine beta-synthase [EC:4.2.1.22] | (RefSeq) cystathionine beta-synthase	[E]	Amino acid transport and metabolism	Pyridoxal-phosphate dependent enzyme	Cystathionine beta-synthase OS=Dictyostelium discoideum OX=44689 GN=cysB PE=2 SV=2	E	Amino acid transport and metabolism	cystathionine beta-synthase [Anoplophora glabripennis]
c54405.graph_c0	65073	71595	73439	18138	38430	19020	468.81	419.54	460.89	101.01	252.84	131.22	0.00379855	-1.33331	down	[D]	Cell cycle control, cell division, chromosome partitioning	--	K06237|0|tca:103313111|K06237 collagen, type IV, alpha | (RefSeq) collagen alpha-2(IV) chain	[W]	Extracellular structures	Collagen triple helix repeat (20 copies);; C-terminal tandem repeated domain in type 4 procollagen	Collagen alpha-1(IV) chain OS=Drosophila melanogaster OX=7227 GN=Col4a1 PE=1 SV=3	S	Function unknown	collagen alpha-1(IV) chain [Anoplophora glabripennis]
c59041.graph_c1	9017	11826	11616	4519	3950	3366	195.91	209.19	219.82	75.79	77.87	69.83	1.97627e-07	-1.33385	down	[CR]	Energy production and conversion ;; General function prediction only	Molecular Function: zinc ion binding (GO:0008270);; Molecular Function: oxidoreductase activity (GO:0016491);; Biological Process: oxidation-reduction process (GO:0055114);;	--	[CR]	--	Zinc-binding dehydrogenase;; Alcohol dehydrogenase GroES-like domain;; Zinc-binding dehydrogenase	Quinone oxidoreductase-like protein 2 homolog OS=Nematostella vectensis OX=45351 GN=v1g238856 PE=3 SV=1	C	Energy production and conversion	synaptic vesicle membrane protein VAT-1 homolog-like [Anoplophora glabripennis]
c55731.graph_c0	2737	2619	2819	1390	841	816	63.35	49.25	56.8	24.82	17.69	18.01	0.000100368	-1.33506	down	--	--	--	--	--	--	--	--	--	--	uncharacterized protein LOC111692895 [Anoplophora glabripennis]
c49584.graph_c0	8842	9205	9150	3060	4219	2594	270.74	227.97	243.75	71.97	117.16	75.92	0.000153313	-1.34208	down	[CI]	Energy production and conversion ;; Lipid transport and metabolism	Molecular Function: binding (GO:0005488);; Cellular Component: membrane (GO:0016020);; Biological Process: single-organism metabolic process (GO:0044710);;	--	[I]	Lipid transport and metabolism	Cytochrome b5-like Heme/Steroid binding domain	Cytochrome b5-related protein OS=Drosophila melanogaster OX=7227 GN=Cyt-b5-r PE=2 SV=2	I	Lipid transport and metabolism	cytochrome b5-related protein [Anoplophora glabripennis]
c54056.graph_c0	6475	6537	7084	2326	2959	2010	94.43	77.49	89.47	26.4	39.09	28.18	4.62769e-05	-1.34368	down	[C]	Energy production and conversion	Cellular Component: mitochondrial inner membrane (GO:0005743);; Biological Process: NADPH regeneration (GO:0006740);; Molecular Function: NAD(P)+ transhydrogenase (AB-specific) activity (GO:0008750);; Biological Process: proton transport (GO:0015992);; Cellular Component: integral component of membrane (GO:0016021);; Molecular Function: NADP binding (GO:0050661);; Molecular Function: NAD binding …	K00323|0|tca:658942|K00323 NAD(P) transhydrogenase [EC:1.6.1.2] | (RefSeq) NAD(P) transhydrogenase, mitochondrial	--	--	NAD(P) transhydrogenase beta subunit;; Alanine dehydrogenase/PNT, C-terminal domain;; Alanine dehydrogenase/PNT, N-terminal domain;; 4TM region of pyridine nucleotide transhydrogenase, mitoch	--	C	Energy production and conversion	NAD(P) transhydrogenase, mitochondrial [Anoplophora glabripennis]
c58807.graph_c0	693	1156	619	445	162	291	17.93	25.47	14.93	8.78	3.86	7.52	0.00675206	-1.34554	down	--	--	--	--	--	--	--	--	S	Function unknown	uncharacterized protein LOC111692481 [Anoplophora glabripennis]
c55895.graph_c1	1297	1455	1862	793	322	563	37.02	36.1	47.92	17.04	8.1	15.82	0.00135775	-1.35025	down	[IQ]	Lipid transport and metabolism ;; Secondary metabolites biosynthesis, transport and catabolism	Molecular Function: catalytic activity (GO:0003824);; Biological Process: metabolic process (GO:0008152);; Cellular Component: membrane (GO:0016020);;	K00666|0|tca:662861|K00666 fatty-acyl-CoA synthase [EC:6.2.1.-] | (RefSeq) acyl-CoA synthetase family member 2, mitochondrial	[I]	Lipid transport and metabolism	AMP-binding enzyme;; AMP-binding enzyme C-terminal domain;; AMP-binding enzyme	Luciferin 4-monooxygenase OS=Luciola mingrelica OX=27446 PE=1 SV=1	IQ	--	acyl-CoA synthetase family member 2, mitochondrial isoform X1 [Anoplophora glabripennis]
c55880.graph_c0	463	1318	1098	473	260	275	7.12	16.4	15.1	5.61	3.59	3.92	0.00358416	-1.35607	down	[M]	Cell wall/membrane/envelope biogenesis	Molecular Function: cGMP-dependent protein kinase activity (GO:0004692);; Molecular Function: ATP binding (GO:0005524);; Biological Process: protein phosphorylation (GO:0006468);;	K07376|0|tca:657149|K07376 cGMP-dependent protein kinase 1 [EC:2.7.11.12] | (RefSeq) cGMP-dependent protein kinase, isozyme 1	[T]	Signal transduction mechanisms	Protein kinase domain;; Cyclic nucleotide-binding domain;; Protein tyrosine kinase	cGMP-dependent protein kinase, isozyme 1 OS=Drosophila melanogaster OX=7227 GN=Pkg21D PE=1 SV=2	T	Signal transduction mechanisms	cGMP-dependent protein kinase, isozyme 1 [Anoplophora glabripennis]
c56009.graph_c0	297	301	288	110	109	101	16.44	12.55	13.12	4.55	5.09	4.87	4.78094e-05	-1.35779	down	--	--	Molecular Function: transferase activity (GO:0016740);;	--	[R]	General function prediction only	--	Nose resistant to fluoxetine protein 6 OS=Caenorhabditis elegans OX=6239 GN=nrf-6 PE=1 SV=3	S	Function unknown	nose resistant to fluoxetine protein 6-like [Anoplophora glabripennis]
c51654.graph_c0	558	679	787	142	324	238	11.18	12.1	13.53	2.31	5.93	4.68	0.00361388	-1.36146	down	--	--	Cellular Component: integral component of membrane (GO:0016021);;	--	[R]	General function prediction only	Immunoglobulin domain;; Immunoglobulin I-set domain;; Immunoglobulin domain;; Immunoglobulin domain;; CD80-like C2-set immunoglobulin domain;; Immunoglobulin V-set domain;; Izumo-like Immunoglobulin domain;; Immunoglobulin C1-set domain	Synaptogenesis protein syg-2 OS=Caenorhabditis elegans OX=6239 GN=syg-2 PE=1 SV=1	S	Function unknown	PREDICTED: hemicentin-2 [Tribolium castaneum]
c49765.graph_c0	7279	8488	8008	2361	3073	2985	227.39	215.24	217.7	56.77	87.05	88.69	1.80917e-05	-1.36407	down	[G]	Carbohydrate transport and metabolism	Molecular Function: phosphoglycerate kinase activity (GO:0004618);; Molecular Function: ATP binding (GO:0005524);; Biological Process: glycolytic process (GO:0006096);;	K00927|0|pxy:105398548|K00927 phosphoglycerate kinase [EC:2.7.2.3] | (RefSeq) phosphoglycerate kinase	[G]	Carbohydrate transport and metabolism	Phosphoglycerate kinase	Phosphoglycerate kinase OS=Drosophila melanogaster OX=7227 GN=Pgk PE=2 SV=2	G	Carbohydrate transport and metabolism	probable phosphoglycerate kinase [Anoplophora glabripennis]
c53451.graph_c0	4467	3645	4167	1295	1846	1269	146.21	100.27	126.12	33.52	57.1	41.99	0.000351887	-1.36772	down	[E]	Amino acid transport and metabolism	Biological Process: arginine metabolic process (GO:0006525);; Molecular Function: transaminase activity (GO:0008483);; Molecular Function: pyridoxal phosphate binding (GO:0030170);;	K00819|0|tca:661018|K00819 ornithine--oxo-acid transaminase [EC:2.6.1.13] | (RefSeq) ornithine aminotransferase, mitochondrial	[E]	Amino acid transport and metabolism	Aminotransferase class-III	Ornithine aminotransferase, mitochondrial OS=Drosophila melanogaster OX=7227 GN=Oat PE=2 SV=1	E	Amino acid transport and metabolism	ornithine aminotransferase, mitochondrial [Anoplophora glabripennis]
c57267.graph_c0	1419	1619	1721	886	345	495	50.95	47.78	54.62	24.61	11.15	16.88	0.00115089	-1.36794	down	[C]	Energy production and conversion	Molecular Function: oxoglutarate dehydrogenase (succinyl-transferring) activity (GO:0004591);; Cellular Component: mitochondrion (GO:0005739);; Cellular Component: cytosol (GO:0005829);; Biological Process: tricarboxylic acid cycle (GO:0006099);; Molecular Function: thiamine pyrophosphate binding (GO:0030976);; Cellular Component: oxoglutarate dehydrogenase complex (GO:0045252);;	K15791|3.04401e-93|tca:656360|K15791 probable 2-oxoglutarate dehydrogenase E1 component DHKTD1 [EC:1.2.4.2] | (RefSeq) DHTKD1; probable 2-oxoglutarate dehydrogenase E1 component DHKTD1 homolog, mitochondrial	[G]	Carbohydrate transport and metabolism	Transketolase, pyrimidine binding domain	Probable 2-oxoglutarate dehydrogenase E1 component DHKTD1 homolog, mitochondrial OS=Caenorhabditis elegans OX=6239 GN=ogdh-2 PE=3 SV=4	C	Energy production and conversion	probable 2-oxoglutarate dehydrogenase E1 component DHKTD1, mitochondrial isoform X4 [Anoplophora glabripennis]
c47414.graph_c0	6596	6990	9331	1963	3510	2539	193.13	166.26	237.87	44.27	93.28	70.78	0.000678954	-1.36935	down	--	--	Molecular Function: lipid binding (GO:0008289);;	--	--	--	Haemolymph juvenile hormone binding protein (JHBP)	--	S	Function unknown	uncharacterized protein LOC108908942 [Anoplophora glabripennis]
c55300.graph_c0	5850	6195	8468	2931	2322	2072	143.72	134.57	195.09	57.84	52.7	49.46	5.58685e-06	-1.37066	down	[I]	Lipid transport and metabolism	Cellular Component: mitochondrion (GO:0005739);; Molecular Function: 3-oxoacid CoA-transferase activity (GO:0008260);; Biological Process: ketone body catabolic process (GO:0046952);;	K01027|0|tca:657047|K01027 3-oxoacid CoA-transferase [EC:2.8.3.5] | (RefSeq) succinyl-CoA:3-ketoacid coenzyme A transferase 1, mitochondrial	[C]	Energy production and conversion	Coenzyme A transferase	Succinyl-CoA:3-ketoacid-coenzyme A transferase, mitochondrial OS=Drosophila melanogaster OX=7227 GN=SCOT PE=1 SV=1	I	Lipid transport and metabolism	succinyl-CoA:3-ketoacid coenzyme A transferase 1, mitochondrial [Anoplophora glabripennis]
c54702.graph_c0	847	2370	1100	393	563	509	37.2	75.21	39.31	11.86	21.51	20.24	0.00485496	-1.37127	down	[R]	General function prediction only	Molecular Function: oxidoreductase activity (GO:0016491);; Biological Process: oxidation-reduction process (GO:0055114);;	K00010|1.21459e-124|tca:658577|K00010 myo-inositol 2-dehydrogenase / D-chiro-inositol 1-dehydrogenase [EC:1.1.1.18 1.1.1.369] | (RefSeq) inositol 2-dehydrogenase	[R]	General function prediction only	--	--	S	Function unknown	uncharacterized protein LOC108905396 [Anoplophora glabripennis]
c57500.graph_c0	4364	3950	4604	1224	1686	1666	102.72	75.53	94.33	22.21	36.07	37.38	0.000148666	-1.37238	down	--	--	--	--	--	--	--	--	--	--	uncharacterized protein LOC108909078 [Anoplophora glabripennis]
c56550.graph_c1	3262	4349	2884	2096	816	903	905.48	959.19	714.91	428.33	206.04	229.77	0.00345437	-1.37292	down	[F]	Nucleotide transport and metabolism	Molecular Function: IMP cyclohydrolase activity (GO:0003937);; Molecular Function: phosphoribosylaminoimidazolecarboxamide formyltransferase activity (GO:0004643);; Biological Process: purine nucleotide biosynthetic process (GO:0006164);;	K00602|1.36627e-44|tca:656241|K00602 phosphoribosylaminoimidazolecarboxamide formyltransferase / IMP cyclohydrolase [EC:2.1.2.3 3.5.4.10] | (RefSeq) bifunctional purine biosynthesis protein PURH	[F]	Nucleotide transport and metabolism	--	Bifunctional purine biosynthesis protein purH OS=Dictyostelium discoideum OX=44689 GN=purH PE=1 SV=1	F	Nucleotide transport and metabolism	bifunctional purine biosynthesis protein PURH [Anoplophora glabripennis]
c56451.graph_c0	11215	11997	11038	7097	3174	2263	260.17	241.31	235.4	143.07	78.41	67.61	0.00486492	-1.37531	down	[E]	Amino acid transport and metabolism	--	K00314|0|tca:656849|K00314 sarcosine dehydrogenase [EC:1.5.8.3] | (RefSeq) sarcosine dehydrogenase, mitochondrial	[E]	Amino acid transport and metabolism	FAD dependent oxidoreductase;; FAD binding domain;; NAD(P)-binding Rossmann-like domain;; FAD binding domain;; FAD dependent oxidoreductase central domain;; FAD dependent oxidoreductase;; Aminomethyltransferase folate-binding domain	--	E	Amino acid transport and metabolism	sarcosine dehydrogenase, mitochondrial [Anoplophora glabripennis]
c46591.graph_c0	321	380	520	187	123	121	14.43	13.9	19.94	6.43	5.01	5.16	9.89731e-05	-1.38262	down	[E]	Amino acid transport and metabolism	Molecular Function: pyrroline-5-carboxylate reductase activity (GO:0004735);; Cellular Component: integral component of membrane (GO:0016021);; Biological Process: oxidation-reduction process (GO:0055114);; Biological Process: L-proline biosynthetic process (GO:0055129);;	K00286|1.18001e-133|tca:664343|K00286 pyrroline-5-carboxylate reductase [EC:1.5.1.2] | (RefSeq) pyrroline-5-carboxylate reductase	[E]	Amino acid transport and metabolism	Pyrroline-5-carboxylate reductase dimerisation;; NADP oxidoreductase coenzyme F420-dependent	Putative pyrroline-5-carboxylate reductase OS=Caenorhabditis elegans OX=6239 GN=F55G1.9 PE=3 SV=1	E	Amino acid transport and metabolism	pyrroline-5-carboxylate reductase isoform X1 [Anoplophora glabripennis]
c58250.graph_c0	3286	4677	5460	1335	1655	1631	34.56	40.27	49.98	10.89	15.93	16.41	1.96365e-05	-1.38465	down	[I]	Lipid transport and metabolism	Cellular Component: exocyst (GO:0000145);; Biological Process: vesicle docking involved in exocytosis (GO:0006904);; Biological Process: protein transport (GO:0015031);; Molecular Function: hydrolase activity (GO:0016787);;	K06111|0|tca:659685|K06111 exocyst complex component 4 | (RefSeq) exocyst complex component 4	[U]	Intracellular trafficking, secretion, and vesicular transport	Carboxylesterase family;; alpha/beta hydrolase fold;; Sec8 exocyst complex component specific domain	Exocyst complex component 4 OS=Drosophila melanogaster OX=7227 GN=Sec8 PE=1 SV=3	U	Intracellular trafficking, secretion, and vesicular transport	exocyst complex component 4 [Anoplophora glabripennis]
c54004.graph_c0	703	792	826	153	302	342	25.72	23.25	25.48	4.48	10.12	11.57	0.00326617	-1.38495	down	--	--	--	K19283|2.05962e-94|tca:659580|K19283 prostatic aicd phosphatase [EC:3.1.3.2 3.1.3.5] | (RefSeq) venom acid phosphatase Acph-1	[I]	Lipid transport and metabolism	Histidine phosphatase superfamily (branch 2)	Venom acid phosphatase Acph-1 OS=Apis mellifera OX=7460 PE=1 SV=1	S	Function unknown	venom acid phosphatase Acph-1-like [Anoplophora glabripennis]
c56230.graph_c1	12321	8333	18290	6945	2847	4190	539.74	275.6	700.99	233.57	110.37	170.77	0.0056645	-1.38693	down	[QV]	Secondary metabolites biosynthesis, transport and catabolism ;; Defense mechanisms	Cellular Component: membrane (GO:0016020);; Molecular Function: oxidoreductase activity (GO:0016491);; Molecular Function: metal ion binding (GO:0046872);;	K14999|0|tca:658544|K14999 cytochrome P450 family 6 [EC:1.14.-.-] | (RefSeq) probable cytochrome P450 6a23	[Q]	Secondary metabolites biosynthesis, transport and catabolism	Cytochrome P450	Cytochrome P450 6A1 OS=Musca domestica OX=7370 GN=CYP6A1 PE=2 SV=1	Q	Secondary metabolites biosynthesis, transport and catabolism	probable cytochrome P450 6a14 isoform X2 [Anoplophora glabripennis]
c55874.graph_c0	2391	1877	3901	1283	762	854	58.85	36.86	82.41	23.9	17	20.81	0.00117345	-1.3877	down	[QV]	Secondary metabolites biosynthesis, transport and catabolism ;; Defense mechanisms	Molecular Function: monooxygenase activity (GO:0004497);; Molecular Function: iron ion binding (GO:0005506);; Cellular Component: integral component of membrane (GO:0016021);; Molecular Function: oxidoreductase activity, acting on paired donors, with incorporation or reduction of molecular oxygen (GO:0016705);; Molecular Function: heme binding (GO:0020037);; Biological Process: oxidation-reductio…	K14999|0|tca:664471|K14999 cytochrome P450 family 6 [EC:1.14.-.-] | (RefSeq) CYP6BQ7; probable cytochrome P450 6a14	[Q]	Secondary metabolites biosynthesis, transport and catabolism	Cytochrome P450	Cytochrome P450 6a8 OS=Drosophila melanogaster OX=7227 GN=Cyp6a8 PE=2 SV=2	Q	Secondary metabolites biosynthesis, transport and catabolism	probable cytochrome P450 6a23 [Anoplophora glabripennis]
c51472.graph_c0	980	1245	1204	431	397	374	37.11	38.15	39.15	12.35	13.33	13.59	9.87533e-08	-1.38832	down	[QR]	Secondary metabolites biosynthesis, transport and catabolism ;; General function prediction only	Molecular Function: zinc ion binding (GO:0008270);; Molecular Function: oxidoreductase activity (GO:0016491);; Biological Process: oxidation-reduction process (GO:0055114);;	K13948|8.32391e-151|tca:657348|K13948 prostaglandin reductase 1 [EC:1.3.1.74 1.3.1.48] | (RefSeq) prostaglandin reductase 1	[R]	General function prediction only	N-terminal domain of oxidoreductase;; Zinc-binding dehydrogenase;; Zinc-binding dehydrogenase	--	S	Function unknown	prostaglandin reductase 1 isoform X1 [Anoplophora glabripennis]
c53053.graph_c0	4014	5022	5492	1517	1919	1601	104.24	106.35	124.71	27.01	41.87	38.47	3.58789e-06	-1.38958	down	[R]	General function prediction only	Molecular Function: ion binding (GO:0043167);; Molecular Function: organic cyclic compound binding (GO:0097159);; Molecular Function: heterocyclic compound binding (GO:1901363);;	--	[R]	General function prediction only	Zinc-finger double domain;; Zinc finger, C2H2 type;; C2H2-type zinc finger;; C2H2-type zinc finger;; Zinc-finger of C2H2 type;; Zinc-finger double-stranded RNA-binding;; Pyridoxamine 5'-phosphate oxidase	Krueppel homolog 1 OS=Drosophila melanogaster OX=7227 GN=Kr-h1 PE=2 SV=2	S	Function unknown	zinc finger protein 2 [Anoplophora glabripennis]
c56529.graph_c0	15236	19363	24764	6739	7643	6136	228.27	238.38	317.97	78.39	103.18	87.44	4.77039e-06	-1.39295	down	[F]	Nucleotide transport and metabolism	Molecular Function: dihydroorotate dehydrogenase activity (GO:0004152);; Cellular Component: cytoplasm (GO:0005737);; Biological Process: 'de novo' pyrimidine nucleobase biosynthetic process (GO:0006207);; Molecular Function: iron-sulfur cluster binding (GO:0051536);; Biological Process: oxidation-reduction process (GO:0055114);;	K00207|0|tca:658821|K00207 dihydropyrimidine dehydrogenase (NADP+) [EC:1.3.1.2] | (RefSeq) dihydropyrimidine dehydrogenase [NADP(+)]	[F]	Nucleotide transport and metabolism	Dihydroorotate dehydrogenase;; Dihydroprymidine dehydrogenase domain II, 4Fe-4S cluster;; Pyridine nucleotide-disulphide oxidoreductase;; NAD(P)-binding Rossmann-like domain;; Pyridine nucleotide-disulphide oxidoreductase;; 4Fe-4S dicluster domain;; 4Fe-4S dicluster domain;; 4Fe-4S dicluster domain;; 4Fe-4S binding domain	Dihydropyrimidine dehydrogenase [NADP(+)] OS=Caenorhabditis elegans OX=6239 GN=dpyd-1 PE=3 SV=2	F	Nucleotide transport and metabolism	dihydropyrimidine dehydrogenase [NADP(+)] [Anoplophora glabripennis]
c56001.graph_c2	607	591	781	177	224	282	27.7	21.61	32.37	5.96	8.92	12.03	0.000382645	-1.39596	down	--	--	--	--	--	--	Domain of unknown function (DUF4817)	--	S	Function unknown	hypothetical protein B7P43_G05336 [Cryptotermes secundus]
c53364.graph_c0	24581	26688	26806	13329	6875	7578	454.91	403.87	437.05	190.47	116.64	134.79	7.40595e-05	-1.39808	down	[C]	Energy production and conversion	Molecular Function: magnesium ion binding (GO:0000287);; Molecular Function: isocitrate dehydrogenase (NADP+) activity (GO:0004450);; Biological Process: isocitrate metabolic process (GO:0006102);; Molecular Function: NAD binding (GO:0051287);; Biological Process: oxidation-reduction process (GO:0055114);;	K00031|0|tca:657289|K00031 isocitrate dehydrogenase [EC:1.1.1.42] | (RefSeq) isocitrate dehydrogenase [NADP] cytoplasmic	[C]	Energy production and conversion	Isocitrate/isopropylmalate dehydrogenase	Isocitrate dehydrogenase [NADP], mitochondrial OS=Dictyostelium discoideum OX=44689 GN=idhM PE=3 SV=1	C	Energy production and conversion	isocitrate dehydrogenase [NADP] cytoplasmic [Anoplophora glabripennis]
c55126.graph_c0	9370	10075	13812	3664	4392	3450	268.55	252.21	342.85	82.56	119.57	90.07	1.20042e-05	-1.39892	down	[T]	Signal transduction mechanisms	Molecular Function: sphingomyelin phosphodiesterase activity (GO:0004767);; Biological Process: sphingomyelin catabolic process (GO:0006685);; Molecular Function: hydrolase activity, acting on glycosyl bonds (GO:0016798);;	K12350|2.87654e-145|tca:655418|K12350 sphingomyelin phosphodiesterase [EC:3.1.4.12] | (RefSeq) sphingomyelin phosphodiesterase	[I]	Lipid transport and metabolism	--	Sphingomyelin phosphodiesterase 1 OS=Caenorhabditis elegans OX=6239 GN=asm-1 PE=1 SV=2	S	Function unknown	sphingomyelin phosphodiesterase 1 [Anoplophora glabripennis]
c55395.graph_c1	566	582	595	151	283	168	13.04	10.97	12.03	3.36	7.48	5.02	0.00108273	-1.40014	down	[G]	Carbohydrate transport and metabolism	--	--	[G]	Carbohydrate transport and metabolism	Major Facilitator Superfamily	--	G	Carbohydrate transport and metabolism	monocarboxylate transporter 14 isoform X2 [Anoplophora glabripennis]
c44207.graph_c0	803	659	724	197	286	280	42.46	28.71	33.2	7.87	13.59	14.04	0.00052255	-1.40082	down	[QR]	Secondary metabolites biosynthesis, transport and catabolism ;; General function prediction only	Molecular Function: zinc ion binding (GO:0008270);; Molecular Function: oxidoreductase activity (GO:0016491);; Biological Process: oxidation-reduction process (GO:0055114);;	K13948|6.61852e-164|tca:657348|K13948 prostaglandin reductase 1 [EC:1.3.1.74 1.3.1.48] | (RefSeq) prostaglandin reductase 1	[R]	General function prediction only	N-terminal domain of oxidoreductase;; Zinc-binding dehydrogenase;; Zinc-binding dehydrogenase	Probable quinone oxidoreductase OS=Leishmania amazonensis OX=5659 PE=3 SV=1	S	Function unknown	prostaglandin reductase 1 [Anoplophora glabripennis]
c47431.graph_c0	6302	9054	10986	2202	3211	3466	168.19	196.25	255.23	45.28	77.82	88.1	0.000252847	-1.40263	down	[E]	Amino acid transport and metabolism	Molecular Function: transaminase activity (GO:0008483);; Biological Process: biosynthetic process (GO:0009058);; Molecular Function: pyridoxal phosphate binding (GO:0030170);;	K00814|0|phu:Phum_PHUM470220|K00814 alanine transaminase [EC:2.6.1.2] | (RefSeq) Alanine aminotransferase, putative	[E]	Amino acid transport and metabolism	Aminotransferase class I and II	Probable alanine aminotransferase, mitochondrial OS=Dictyostelium discoideum OX=44689 GN=gpt PE=3 SV=1	E	Amino acid transport and metabolism	alanine aminotransferase 1 [Anoplophora glabripennis]
c56348.graph_c0	3550	4941	3834	1443	1308	1509	155.99	178.94	149.19	46.01	52.75	65.09	7.86845e-07	-1.40266	down	--	--	--	--	[S]	Function unknown	--	--	S	Function unknown	transmembrane protein 135-like [Anoplophora glabripennis]
c51626.graph_c0	1250	1722	2352	348	799	630	27.39	30.29	46.11	5.81	15.55	13.94	0.00396081	-1.4035	down	[IQ]	Lipid transport and metabolism ;; Secondary metabolites biosynthesis, transport and catabolism	--	--	[I]	Lipid transport and metabolism	AMP-binding enzyme;; AMP-binding enzyme;; AMP-binding enzyme C-terminal domain	Probable 4-coumarate--CoA ligase 3 OS=Dictyostelium discoideum OX=44689 GN=4cl3 PE=3 SV=2	IQ	--	4-coumarate--CoA ligase 1-like [Anoplophora glabripennis]
c54013.graph_c0	11828	12548	11277	7006	3439	2329	271.53	234.02	225.39	123.99	71.78	50.98	0.00281049	-1.40434	down	[C]	Energy production and conversion	Molecular Function: aconitate hydratase activity (GO:0003994);; Cellular Component: mitochondrion (GO:0005739);; Biological Process: tricarboxylic acid cycle (GO:0006099);; Molecular Function: metal ion binding (GO:0046872);; Molecular Function: 4 iron, 4 sulfur cluster binding (GO:0051539);;	K01681|0|tca:663732|K01681 aconitate hydratase [EC:4.2.1.3] | (RefSeq) probable aconitate hydratase, mitochondrial	[CE]	--	Aconitase family (aconitate hydratase)	Probable aconitate hydratase, mitochondrial OS=Caenorhabditis elegans OX=6239 GN=aco-2 PE=3 SV=2	C	Energy production and conversion	probable aconitate hydratase, mitochondrial [Anoplophora glabripennis]
c53950.graph_c1	3328	4162	4713	1758	1181	1307	86.33	87.83	107.98	35.6	28.69	32.69	7.6284e-07	-1.4046	down	[R]	General function prediction only	Molecular Function: acyl-CoA dehydrogenase activity (GO:0003995);; Molecular Function: flavin adenine dinucleotide binding (GO:0050660);; Biological Process: oxidation-reduction process (GO:0055114);;	K10251|2.78059e-167|tca:660392|K10251 17beta-estradiol 17-dehydrogenase / very-long-chain 3-oxoacyl-CoA reductase [EC:1.1.1.62 1.1.1.330] | (RefSeq) very-long-chain 3-oxoacyl-CoA reductase	[I]	Lipid transport and metabolism	short chain dehydrogenase;; Enoyl-(Acyl carrier protein) reductase;; KR domain	Very-long-chain 3-oxooacyl-coA reductase let-767 OS=Caenorhabditis elegans OX=6239 GN=let-767 PE=1 SV=2	S	Function unknown	very-long-chain 3-oxoacyl-CoA reductase [Anoplophora glabripennis]
c48922.graph_c0	4913	7327	9435	2362	2772	2225	131.86	151.85	238.81	49.34	74.54	53.37	2.61186e-05	-1.4051	down	[G]	Carbohydrate transport and metabolism	Cellular Component: integral component of membrane (GO:0016021);; Molecular Function: substrate-specific transmembrane transporter activity (GO:0022891);; Biological Process: transmembrane transport (GO:0055085);;	K14258|0|tca:655737|K14258 facilitated trehalose transporter | (RefSeq) facilitated trehalose transporter Tret1	[R]	General function prediction only	Sugar (and other) transporter;; Major Facilitator Superfamily	Facilitated trehalose transporter Tret1 OS=Culex quinquefasciatus OX=7176 GN=Tret1 PE=3 SV=1	G	Carbohydrate transport and metabolism	facilitated trehalose transporter Tret1-like isoform X3 [Anoplophora glabripennis]
c44004.graph_c0	2982	4243	5239	832	1910	1413	556.67	635.47	846.37	116.57	309.86	240.73	0.00278597	-1.40781	down	--	--	--	--	[R]	General function prediction only	Kazal-type serine protease inhibitor domain;; Kazal-type serine protease inhibitor domain	Turripeptide Ici9.1 (Fragment) OS=Iotyrris cingulifera OX=553733 PE=2 SV=1	S	Function unknown	serine protease inhibitor Kazal-type 1-like [Anoplophora glabripennis]
c58984.graph_c0	1743	2090	2442	1159	562	484	27.56	26.93	33.55	14.56	8.1	7.29	0.000682402	-1.41053	down	[C]	Energy production and conversion	Molecular Function: oxoglutarate dehydrogenase (succinyl-transferring) activity (GO:0004591);; Biological Process: tricarboxylic acid cycle (GO:0006099);; Molecular Function: thiamine pyrophosphate binding (GO:0030976);;	K15791|0|tca:656360|K15791 probable 2-oxoglutarate dehydrogenase E1 component DHKTD1 [EC:1.2.4.2] | (RefSeq) DHTKD1; probable 2-oxoglutarate dehydrogenase E1 component DHKTD1 homolog, mitochondrial	[G]	Carbohydrate transport and metabolism	Dehydrogenase E1 component;; Reverse transcriptase (RNA-dependent DNA polymerase)	Probable 2-oxoglutarate dehydrogenase E1 component DHKTD1 homolog, mitochondrial OS=Drosophila melanogaster OX=7227 GN=CG1544 PE=2 SV=2	C	Energy production and conversion	probable 2-oxoglutarate dehydrogenase E1 component DHKTD1 homolog, mitochondrial isoform X2 [Anoplophora glabripennis]
c57290.graph_c0	385	373	804	155	179	194	10.35	7.59	19.2	2.6	4.46	4.62	0.00199963	-1.41139	down	--	--	Cellular Component: integral component of membrane (GO:0016021);; Biological Process: dsRNA transport (GO:0033227);; Molecular Function: RNA transmembrane transporter activity (GO:0051033);;	--	--	--	dsRNA-gated channel SID-1	Systemic RNA interference defective protein 1 OS=Caenorhabditis elegans OX=6239 GN=sid-1 PE=1 SV=2	U	Intracellular trafficking, secretion, and vesicular transport	SID1 transmembrane family member 1 [Anoplophora glabripennis]
c51177.graph_c0	1091	915	1408	306	429	433	49.7	33.78	55.74	10.7	17.64	18.67	0.000383385	-1.41492	down	[T]	Signal transduction mechanisms	--	K18201|7.19259e-114|tca:663889|K18201 hydroxylysine kinase [EC:2.7.1.81] | (RefSeq) hydroxylysine kinase	--	--	Phosphotransferase enzyme family	--	S	Function unknown	hydroxylysine kinase [Anoplophora glabripennis]
c55578.graph_c0	1877	1059	1374	613	345	581	54.04	24.88	33.87	13.01	9.08	14.64	0.0031134	-1.41493	down	[E]	Amino acid transport and metabolism	Molecular Function: transporter activity (GO:0005215);; Cellular Component: integral component of membrane (GO:0016021);; Biological Process: transmembrane transport (GO:0055085);;	K14388|0|tca:662639|K14388 solute carrier family 5 (sodium-coupled monocarboxylate transporter), member 8/12 | (RefSeq) putative sodium-dependent multivitamin transporter	[P]	Inorganic ion transport and metabolism	Sodium:solute symporter family	Putative sodium-dependent multivitamin transporter OS=Drosophila melanogaster OX=7227 GN=CG32669 PE=2 SV=1	E	Amino acid transport and metabolism	putative sodium-dependent multivitamin transporter [Anoplophora glabripennis]
c49114.graph_c0	990	1253	1258	625	345	255	49.47	50.74	54.65	23.96	15.55	12.06	0.000458577	-1.41505	down	[E]	Amino acid transport and metabolism	Biological Process: polyamine metabolic process (GO:0006595);; Molecular Function: transferase activity (GO:0016740);;	K00797|8.77333e-141|tca:655282|K00797 spermidine synthase [EC:2.5.1.16] | (RefSeq) spermidine synthase	[E]	Amino acid transport and metabolism	Spermine/spermidine synthase domain;; Spermidine synthase tetramerisation domain	Spermidine synthase OS=Dictyostelium discoideum OX=44689 GN=spsA PE=3 SV=2	E	Amino acid transport and metabolism	spermidine synthase [Anoplophora glabripennis]
c53055.graph_c0	721	746	749	161	330	261	20.67	17.37	18.69	3.56	8.59	7.12	0.00132741	-1.41681	down	[I]	Lipid transport and metabolism	--	--	[R]	General function prediction only	Carboxylesterase family;; alpha/beta hydrolase fold	Esterase B1 OS=Culex pipiens OX=7175 GN=B1 PE=3 SV=1	I	Lipid transport and metabolism	esterase B1 [Anoplophora glabripennis]
c52854.graph_c0	4673	6027	6130	1481	1947	2239	162.05	173.79	183.29	42.31	60.1	80.88	3.76042e-05	-1.42097	down	[I]	Lipid transport and metabolism	Molecular Function: 3-hydroxyacyl-CoA dehydrogenase activity (GO:0003857);; Biological Process: fatty acid metabolic process (GO:0006631);; Biological Process: oxidation-reduction process (GO:0055114);; Molecular Function: NAD+ binding (GO:0070403);;	K13247|2.23964e-172|tca:656318|K13247 L-gulonate 3-dehydrogenase [EC:1.1.1.45] | (RefSeq) lambda-crystallin	[I]	Lipid transport and metabolism	3-hydroxyacyl-CoA dehydrogenase, NAD binding domain;; 3-hydroxyacyl-CoA dehydrogenase, C-terminal domain;; NAD binding domain of 6-phosphogluconate dehydrogenase;; D-isomer specific 2-hydroxyacid dehydrogenase, NAD binding domain;; UDP-glucose/GDP-mannose dehydrogenase family, NAD binding domain	--	I	Lipid transport and metabolism	lambda-crystallin homolog [Anoplophora glabripennis]
c55494.graph_c0	14162	28777	20883	8142	7823	5521	234.62	394.9	302.76	105.03	118.06	87.21	3.65205e-05	-1.42282	down	[G]	Carbohydrate transport and metabolism	Cellular Component: endoplasmic reticulum membrane (GO:0005789);; Biological Process: glycogen catabolic process (GO:0005980);; Molecular Function: glycogen phosphorylase activity (GO:0008184);; Cellular Component: integral component of membrane (GO:0016021);; Molecular Function: pyridoxal phosphate binding (GO:0030170);;	K00688|0|tca:657406|K00688 glycogen phosphorylase [EC:2.4.1.1] | (RefSeq) glycogen phosphorylase	[G]	Carbohydrate transport and metabolism	Carbohydrate phosphorylase	Glycogen phosphorylase OS=Drosophila melanogaster OX=7227 GN=GlyP PE=2 SV=2	G	Carbohydrate transport and metabolism	glycogen phosphorylase [Anoplophora glabripennis]
c57210.graph_c0	379	599	824	108	202	276	6.43	8.81	12.23	1.4	3.18	4.35	0.00800551	-1.42544	down	--	--	Biological Process: ion transport (GO:0006811);;	K03440|0|tca:661065|K03440 acid-sensing ion channel, other | (RefSeq) pickpocket protein 28	[PT]	--	Amiloride-sensitive sodium channel;; Amiloride-sensitive sodium channel	Pickpocket protein 28 OS=Drosophila melanogaster OX=7227 GN=ppk28 PE=1 SV=2	S	Function unknown	pickpocket protein 28-like isoform X1 [Anoplophora glabripennis]
c56140.graph_c0	1809	2227	2520	582	931	687	44.63	44.63	54.14	11.07	20.87	16.15	7.37326e-05	-1.4281	down	[G]	Carbohydrate transport and metabolism	Molecular Function: beta-galactosidase activity (GO:0004565);; Biological Process: carbohydrate metabolic process (GO:0005975);;	--	[G]	Carbohydrate transport and metabolism	Glycosyl hydrolases family 35;; Beta-galactosidase	Beta-galactosidase 1 OS=Dictyostelium discoideum OX=44689 GN=glb1 PE=3 SV=1	G	Carbohydrate transport and metabolism	beta-galactosidase-1-like protein 2 [Anoplophora glabripennis]
c51093.graph_c0	1285	1731	2036	312	834	517	29.86	32.98	41.54	5.61	17.51	11.39	0.0045646	-1.42835	down	--	--	--	--	--	--	--	--	--	--	uncharacterized protein LOC108911265 [Anoplophora glabripennis]
c58962.graph_c0	6056	7190	8729	1258	3376	2606	72.73	71.21	92.98	12.13	37.6	30.68	0.00454293	-1.43112	down	[P]	Inorganic ion transport and metabolism	--	--	[R]	General function prediction only	Eukaryotic-type carbonic anhydrase	Putative carbonic anhydrase-like protein 2 OS=Caenorhabditis elegans OX=6239 GN=cah-2 PE=1 SV=3	P	Inorganic ion transport and metabolism	carbonic anhydrase-related protein 10 [Anoplophora glabripennis]
c56311.graph_c0	4041	5984	9265	2543	1946	1939	70.76	86.05	138.81	33.75	30.6	33.03	9.35163e-05	-1.43912	down	[I]	Lipid transport and metabolism	Molecular Function: O-acyltransferase activity (GO:0008374);; Cellular Component: integral component of membrane (GO:0016021);; Biological Process: cellular lipid metabolic process (GO:0044255);;	K00629|0|tca:656036|K00629 glycerol-3-phosphate O-acyltransferase 1/2 [EC:2.3.1.15] | (RefSeq) glycerol-3-phosphate acyltransferase 1, mitochondrial	[I]	Lipid transport and metabolism	Acyltransferase	Probable glycerol-3-phosphate acyltransferase, mitochondrial OS=Caenorhabditis elegans OX=6239 GN=acl-6 PE=3 SV=1	I	Lipid transport and metabolism	glycerol-3-phosphate acyltransferase 1, mitochondrial isoform X2 [Anoplophora glabripennis]
c58191.graph_c0	1013	1380	1607	577	402	374	21.89	22.73	29.85	9.08	7.62	7.38	2.99711e-06	-1.44024	down	--	--	--	--	--	--	7 transmembrane receptor (Secretin family)	G-protein coupled receptor Mth2 OS=Drosophila yakuba OX=7245 GN=mth2 PE=3 SV=1	S	Function unknown	G-protein coupled receptor Mth2-like [Anoplophora glabripennis]
c54352.graph_c2	2115	2717	2129	1485	403	537	47.95	48.91	41.65	25.39	8	12.02	0.00864248	-1.44052	down	--	--	--	K04506|2.46552e-125|tca:100142361|K04506 E3 ubiquitin-protein ligase SIAH1 [EC:2.3.2.27] | (RefSeq) E3 ubiquitin-protein ligase sina	[R]	General function prediction only	Seven in absentia protein family	E3 ubiquitin-protein ligase sina OS=Schistosoma mansoni OX=6183 GN=SINA PE=1 SV=1	O	Posttranslational modification, protein turnover, chaperones	E3 ubiquitin-protein ligase sina [Anoplophora glabripennis]
c54684.graph_c0	2564	3283	4290	1045	1288	1043	72.65	75.25	105.84	23.16	33.47	28.7	8.49293e-06	-1.44083	down	[IQ]	Lipid transport and metabolism ;; Secondary metabolites biosynthesis, transport and catabolism	Molecular Function: catalytic activity (GO:0003824);; Biological Process: metabolic process (GO:0008152);; Cellular Component: membrane (GO:0016020);;	--	[I]	Lipid transport and metabolism	AMP-binding enzyme;; AMP-binding enzyme C-terminal domain	Luciferin 4-monooxygenase OS=Aquatica lateralis OX=7052 PE=2 SV=1	IQ	--	4-coumarate--CoA ligase 1-like [Anoplophora glabripennis]
c57762.graph_c0	7641	6852	11399	2358	3533	2771	143.18	105.86	187.96	34	60.37	50.56	0.000264361	-1.44147	down	[T]	Signal transduction mechanisms	Molecular Function: protein serine/threonine kinase activity (GO:0004674);; Molecular Function: ATP binding (GO:0005524);; Biological Process: protein phosphorylation (GO:0006468);;	K07359|0|tca:661026|K07359 calcium/calmodulin-dependent protein kinase kinase 2 [EC:2.7.11.17] | (RefSeq) calcium/calmodulin-dependent protein kinase kinase 2	[T]	Signal transduction mechanisms	Protein kinase domain;; Protein tyrosine kinase;; Phosphotransferase enzyme family	Calcium/calmodulin-dependent protein kinase kinase OS=Caenorhabditis elegans OX=6239 GN=ckk-1 PE=1 SV=2	T	Signal transduction mechanisms	calcium/calmodulin-dependent protein kinase kinase [Anoplophora glabripennis]
c58558.graph_c0	10631	10767	11714	4495	3934	2914	130.59	107.55	125.36	42.65	44.06	34.23	1.91158e-06	-1.44201	down	[C]	Energy production and conversion	Molecular Function: ATP citrate synthase activity (GO:0003878);; Molecular Function: ATP binding (GO:0005524);; Cellular Component: cytoplasm (GO:0005737);; Biological Process: acetyl-CoA biosynthetic process (GO:0006085);; Biological Process: citrate metabolic process (GO:0006101);; Biological Process: lipid metabolic process (GO:0006629);; Molecular Function: metal ion binding (GO:0046872);; Mo…	K01648|0|tca:656728|K01648 ATP citrate (pro-S)-lyase [EC:2.3.3.8] | (RefSeq) ATP-citrate synthase	[C]	Energy production and conversion	ATP citrate lyase citrate-binding;; Citrate synthase, C-terminal domain;; CoA-ligase;; CoA binding domain;; ATP-grasp domain	Probable ATP-citrate synthase OS=Caenorhabditis elegans OX=6239 GN=acly-1 PE=3 SV=1	C	Energy production and conversion	ATP-citrate synthase isoform X2 [Anoplophora glabripennis]
c55524.graph_c0	3677	2781	3619	1341	777	1352	106.44	62.33	92.31	29	19.04	37.43	0.00036938	-1.44252	down	[G]	Carbohydrate transport and metabolism	Biological Process: glucose transport (GO:0015758);; Cellular Component: integral component of membrane (GO:0016021);; Biological Process: hexose transmembrane transport (GO:0035428);; Molecular Function: sugar transmembrane transporter activity (GO:0051119);;	K08145|0|tca:657731|K08145 MFS transporter, SP family, solute carrier family 2 (facilitated glucose transporter), member 8 | (RefSeq) facilitated trehalose transporter Tret1	[R]	General function prediction only	Sugar (and other) transporter;; Major Facilitator Superfamily	Facilitated trehalose transporter Tret1 OS=Culex quinquefasciatus OX=7176 GN=Tret1 PE=3 SV=1	G	Carbohydrate transport and metabolism	facilitated trehalose transporter Tret1-like isoform X1 [Anoplophora glabripennis]
c54849.graph_c0	2757	1541	2865	806	861	797	78.11	36.46	70.02	17.47	22.33	23.08	0.00080161	-1.44273	down	[K]	Transcription	--	--	[R]	General function prediction only	Leucine rich repeat;; Leucine Rich repeats (2 copies);; Leucine rich repeats (6 copies);; Leucine Rich Repeat;; Leucine Rich repeat	Leucine-rich repeat-containing protein let-4 OS=Caenorhabditis elegans OX=6239 GN=let-4 PE=2 SV=2	S	Function unknown	leucine-rich repeat neuronal protein 3 [Anoplophora glabripennis]
c55573.graph_c2	11131	13780	11227	2704	3303	5929	395.38	383.5	386.99	103.11	148.66	214.6	0.0016742	-1.44505	down	[IQR]	Lipid transport and metabolism ;; Secondary metabolites biosynthesis, transport and catabolism ;; General function prediction only	Molecular Function: oxidoreductase activity (GO:0016491);; Biological Process: oxidation-reduction process (GO:0055114);;	K00069|1.21819e-109|tca:655267|K00069 15-hydroxyprostaglandin dehydrogenase (NAD) [EC:1.1.1.141] | (RefSeq) 15-hydroxyprostaglandin dehydrogenase [NAD(+)]	[IR]	--	short chain dehydrogenase;; Enoyl-(Acyl carrier protein) reductase;; KR domain	Alcohol dehydrogenase 2 OS=Ceratitis capitata OX=7213 GN=ADH2 PE=3 SV=1	S	Function unknown	15-hydroxyprostaglandin dehydrogenase [NAD(+)]-like [Anoplophora glabripennis]
c50545.graph_c0	361	526	660	160	106	242	10.69	12.99	17.04	3.65	2.85	6.82	0.00185405	-1.44552	down	[QV]	Secondary metabolites biosynthesis, transport and catabolism ;; Defense mechanisms	--	K15005|2.08696e-129|tca:100142088|K15005 cytochrome P450 family 28 [EC:1.14.-.-] | (RefSeq) cytochrome P450 6k1-like	[Q]	Secondary metabolites biosynthesis, transport and catabolism	Cytochrome P450	Cytochrome P450 6j1 OS=Blattella germanica OX=6973 GN=CYP6J1 PE=2 SV=1	Q	Secondary metabolites biosynthesis, transport and catabolism	uncharacterized protein LOC108906388 [Anoplophora glabripennis]
c51109.graph_c0	1400	2204	2096	563	639	680	45.34	57.64	58.82	14.17	18.63	21.42	2.69753e-06	-1.44605	down	--	--	Cellular Component: Golgi apparatus (GO:0005794);; Cellular Component: membrane (GO:0016020);; Molecular Function: transferase activity, transferring glycosyl groups (GO:0016757);; Biological Process: glycosylation (GO:0070085);;	K00753|1.49577e-172|tca:656368|K00753 glycoprotein 3-alpha-L-fucosyltransferase [EC:2.4.1.214] | (RefSeq) glycoprotein 3-alpha-L-fucosyltransferase A	[GE]	--	Fucosyltransferase, N-terminal;; Glycosyltransferase family 10 (fucosyltransferase) C-term;; Glycosyltransferase family 10 (fucosyltransferase) C-term	Glycoprotein 3-alpha-L-fucosyltransferase A OS=Drosophila melanogaster OX=7227 GN=FucTA PE=2 SV=2	S	Function unknown	glycoprotein 3-alpha-L-fucosyltransferase A [Anoplophora glabripennis]
c56623.graph_c0	598	752	729	219	234	242	66.78	67.61	70.12	16.77	22.45	27.51	7.14153e-07	-1.44802	down	--	--	--	--	--	--	--	--	S	Function unknown	transposase-like protein [Lasius niger]
c57684.graph_c0	4685	3834	6677	1700	1822	1591	125.45	84.98	159.68	35.3	46.21	40.66	5.86911e-05	-1.45074	down	[QV]	Secondary metabolites biosynthesis, transport and catabolism ;; Defense mechanisms	Cellular Component: membrane (GO:0016020);; Molecular Function: oxidoreductase activity (GO:0016491);; Molecular Function: metal ion binding (GO:0046872);;	K14999|0|tca:659050|K14999 cytochrome P450 family 6 [EC:1.14.-.-] | (RefSeq) CYP6BK2; cytochrome P450 6BK2	[Q]	Secondary metabolites biosynthesis, transport and catabolism	Cytochrome P450	Probable cytochrome P450 6a14 OS=Drosophila melanogaster OX=7227 GN=Cyp6a14 PE=3 SV=2	Q	Secondary metabolites biosynthesis, transport and catabolism	probable cytochrome P450 6a14 [Anoplophora glabripennis]
c56352.graph_c0	10975	13585	12702	4484	4338	3704	284.37	286.66	286.14	88.4	102.77	91.35	1.30132e-08	-1.45199	down	[G]	Carbohydrate transport and metabolism	Molecular Function: magnesium ion binding (GO:0000287);; Molecular Function: phosphoglucomutase activity (GO:0004614);; Molecular Function: phosphoglycerate mutase activity (GO:0004619);; Molecular Function: protein serine/threonine kinase activity (GO:0004674);; Molecular Function: ATP binding (GO:0005524);; Biological Process: glycogen biosynthetic process (GO:0005978);; Biological Process: glu…	K01835|0|tca:654888|K01835 phosphoglucomutase [EC:5.4.2.2] | (RefSeq) phosphoglucomutase	[G]	Carbohydrate transport and metabolism	Phosphoglucomutase/phosphomannomutase, alpha/beta/alpha domain I;; Phosphoglucomutase/phosphomannomutase, alpha/beta/alpha domain III;; Phosphoglucomutase/phosphomannomutase, alpha/beta/alpha domain II;; Phosphoglucomutase/phosphomannomutase, C-terminal domain	Phosphoglucomutase OS=Drosophila melanogaster OX=7227 GN=Pgm PE=1 SV=1	G	Carbohydrate transport and metabolism	phosphoglucomutase isoform X2 [Anoplophora glabripennis]
c52705.graph_c0	2226	3585	3951	1327	1098	820	66.3	86.49	100.47	29.66	30.21	22.83	8.24485e-06	-1.45247	down	[E]	Amino acid transport and metabolism	Molecular Function: 4-aminobutyrate transaminase activity (GO:0003867);; Cellular Component: mitochondrion (GO:0005739);; Biological Process: gamma-aminobutyric acid catabolic process (GO:0009450);; Molecular Function: pyridoxal phosphate binding (GO:0030170);; Molecular Function: identical protein binding (GO:0042802);;	K13524|0|tca:656992|K13524 4-aminobutyrate aminotransferase / (S)-3-amino-2-methylpropionate transaminase [EC:2.6.1.19 2.6.1.22] | (RefSeq) 4-aminobutyrate aminotransferase, mitochondrial-like	[E]	Amino acid transport and metabolism	Aminotransferase class-III;; Aminotransferase class I and II;; Aminotransferase class-III	4-aminobutyrate aminotransferase OS=Dictyostelium discoideum OX=44689 GN=gabT PE=3 SV=1	E	Amino acid transport and metabolism	4-aminobutyrate aminotransferase, mitochondrial [Anoplophora glabripennis]
c57560.graph_c2	4929	6037	5338	2697	1203	1658	402.41	390.43	390.55	164.44	86.97	129.71	0.000114385	-1.45354	down	[Q]	Secondary metabolites biosynthesis, transport and catabolism	--	K13356|8.09579e-72|tca:655283|K13356 alcohol-forming fatty acyl-CoA reductase [EC:1.2.1.84] | (RefSeq) putative fatty acyl-CoA reductase CG5065	[I]	Lipid transport and metabolism	Male sterility protein;; Male sterility protein	Fatty acyl-CoA reductase wat OS=Drosophila melanogaster OX=7227 GN=wat PE=1 SV=1	S	Function unknown	fatty acyl-CoA reductase wat-like [Anoplophora glabripennis]
c59463.graph_c0	1059	800	1444	434	315	370	17.47	11.29	20.22	5.99	5.06	6.49	0.000151724	-1.45404	down	--	--	--	--	--	--	--	--	--	--	uncharacterized protein LOC111692235 [Anoplophora glabripennis]
c58917.graph_c0	3846	5273	5303	1361	1895	1500	95.62	105.16	112.93	32.71	43.05	43	5.11904e-06	-1.45411	down	[G]	Carbohydrate transport and metabolism	Molecular Function: 1,4-alpha-glucan branching enzyme activity (GO:0003844);; Molecular Function: hydrolase activity, hydrolyzing O-glycosyl compounds (GO:0004553);; Biological Process: glycogen biosynthetic process (GO:0005978);; Molecular Function: cation binding (GO:0043169);;	K00700|0|tca:657075|K00700 1,4-alpha-glucan branching enzyme [EC:2.4.1.18] | (RefSeq) 1,4-alpha-glucan-branching enzyme	[G]	Carbohydrate transport and metabolism	Alpha amylase, C-terminal all-beta domain;; Carbohydrate-binding module 48 (Isoamylase N-terminal domain);; Alpha amylase, catalytic domain	1,4-alpha-glucan-branching enzyme OS=Dictyostelium discoideum OX=44689 GN=glgB PE=3 SV=1	G	Carbohydrate transport and metabolism	1,4-alpha-glucan-branching enzyme [Anoplophora glabripennis]
c56152.graph_c0	1329	2218	1554	559	638	489	43.27	59.15	43.42	14.39	19.86	16.14	6.34158e-06	-1.45509	down	--	--	--	--	--	--	7 transmembrane receptor (Secretin family);; Frizzled/Smoothened family membrane region;; Methuselah N-terminus	G-protein coupled receptor Mth2 OS=Drosophila simulans OX=7240 GN=mth2 PE=3 SV=1	S	Function unknown	G-protein coupled receptor Mth2-like [Anoplophora glabripennis]
c49166.graph_c0	302	404	484	123	139	130	14.02	15.21	19.54	4.38	5.83	5.72	9.60361e-06	-1.45755	down	--	--	Cellular Component: nucleus (GO:0005634);; Biological Process: regulation of transcription, DNA-templated (GO:0006355);; Molecular Function: sequence-specific DNA binding (GO:0043565);;	K09341|1.06721e-82|tca:641531|K09341 homeobox protein MSX | (RefSeq) Msh, Tc-msh; muscle segment homeodomain protein	[R]	General function prediction only	Homeobox domain	Muscle segmentation homeobox OS=Drosophila melanogaster OX=7227 GN=Dr PE=2 SV=2	K	Transcription	homeobox protein MSX-3-like [Anoplophora glabripennis]
c54954.graph_c0	991	3348	1845	493	740	715	22.72	63.77	37.32	8.83	15.04	15.9	0.00399689	-1.46046	down	[EH]	Amino acid transport and metabolism ;; Coenzyme transport and metabolism	Molecular Function: magnesium ion binding (GO:0000287);; Cellular Component: integral component of membrane (GO:0016021);; Molecular Function: lyase activity (GO:0016829);; Molecular Function: thiamine pyrophosphate binding (GO:0030976);;	K12261|0|tca:664029|K12261 2-hydroxyacyl-CoA lyase 1 [EC:4.1.-.-] | (RefSeq) 2-hydroxyacyl-CoA lyase 1	[EH]	--	Thiamine pyrophosphate enzyme, N-terminal TPP binding domain;; Thiamine pyrophosphate enzyme, central domain;; Thiamine pyrophosphate enzyme, C-terminal TPP binding domain;; CO dehydrogenase beta subunit/acetyl-CoA synthase epsilon subunit	Probable 2-hydroxyacyl-CoA lyase 1 OS=Dictyostelium discoideum OX=44689 GN=hacl1 PE=3 SV=1	E	Amino acid transport and metabolism	2-hydroxyacyl-CoA lyase 1 [Anoplophora glabripennis]
c57803.graph_c0	1365	1898	1453	279	551	693	178.35	199.89	164.71	27.61	63.51	83.84	0.00281049	-1.4623	down	[C]	Energy production and conversion	Molecular Function: phosphoglycerate kinase activity (GO:0004618);; Cellular Component: cytoplasm (GO:0005737);; Biological Process: glycolytic process (GO:0006096);; Biological Process: one-carbon metabolic process (GO:0006730);; Biological Process: biosynthetic process (GO:0009058);; Biological Process: 10-formyltetrahydrofolate catabolic process (GO:0009258);; Molecular Function: formyltetrahy…	K00289|2.03149e-102|tca:658435|K00289 formyltetrahydrofolate dehydrogenase [EC:1.5.1.6] | (RefSeq) cytosolic 10-formyltetrahydrofolate dehydrogenase	[F]	Nucleotide transport and metabolism	Aldehyde dehydrogenase family	Aldehyde dehydrogenase OS=Enchytraeus buchholzi OX=34589 GN=ALDH PE=2 SV=1	C	Energy production and conversion	cytosolic 10-formyltetrahydrofolate dehydrogenase [Anoplophora glabripennis]
c56949.graph_c0	640	469	864	321	174	177	21.26	11.39	25.19	6.92	4.37	4.31	0.000900209	-1.46296	down	--	--	--	--	--	--	Transcription factor IIIC subunit delta N-term	--	S	Function unknown	uncharacterized protein LOC108910411 [Anoplophora glabripennis]
c58387.graph_c0	9562	12416	13753	4332	3445	4050	117.07	125.14	146.57	42.26	39.28	47.69	3.48135e-08	-1.46537	down	[I]	Lipid transport and metabolism	Biological Process: metabolic process (GO:0008152);; Cellular Component: membrane (GO:0016020);; Molecular Function: hydrolase activity (GO:0016787);;	K01062|1.71221e-154|tca:659999|K01062 platelet-activating factor acetylhydrolase [EC:3.1.1.47] | (RefSeq) platelet-activating factor acetylhydrolase	[I]	Lipid transport and metabolism	Platelet-activating factor acetylhydrolase, isoform II;; Enoyl-CoA hydratase/isomerase;; Enoyl-CoA hydratase/isomerase	Probable enoyl-CoA hydratase, mitochondrial OS=Caenorhabditis elegans OX=6239 GN=ech-6 PE=3 SV=1	I	Lipid transport and metabolism	platelet-activating factor acetylhydrolase-like [Anoplophora glabripennis]
c49828.graph_c0	3677	4458	5739	1079	1604	1811	224.86	220.82	305.08	50.57	88.23	104.8	0.000169838	-1.46763	down	[IQR]	Lipid transport and metabolism ;; Secondary metabolites biosynthesis, transport and catabolism ;; General function prediction only	Biological Process: carbohydrate metabolic process (GO:0005975);; Molecular Function: oxidoreductase activity (GO:0016491);; Biological Process: oxidation-reduction process (GO:0055114);;	K03331|2.18396e-129|tca:660788|K03331 L-xylulose reductase [EC:1.1.1.10] | (RefSeq) L-xylulose reductase	[Q]	Secondary metabolites biosynthesis, transport and catabolism	Enoyl-(Acyl carrier protein) reductase;; short chain dehydrogenase;; KR domain;; NAD(P)H-binding;; NAD dependent epimerase/dehydratase family	L-xylulose reductase OS=Caenorhabditis elegans OX=6239 GN=dhs-21 PE=1 SV=2	S	Function unknown	uncharacterized protein LOC108905100 [Anoplophora glabripennis]
c56526.graph_c0	565	835	762	289	212	211	11.18	14.06	14.24	4.34	3.9	3.94	3.17334e-07	-1.47638	down	[M]	Cell wall/membrane/envelope biogenesis	Molecular Function: transporter activity (GO:0005215);; Cellular Component: membrane (GO:0016020);; Biological Process: transmembrane transport (GO:0055085);;	K14388|0|tca:107397947|K14388 solute carrier family 5 (sodium-coupled monocarboxylate transporter), member 8/12 | (RefSeq) sodium-coupled monocarboxylate transporter 1-like	[P]	Inorganic ion transport and metabolism	Sodium:solute symporter family	Putative sodium-dependent multivitamin transporter OS=Drosophila melanogaster OX=7227 GN=CG32669 PE=2 SV=1	E	Amino acid transport and metabolism	sodium-coupled monocarboxylate transporter 1-like isoform X1 [Anoplophora glabripennis]
c41174.graph_c0	6143	11869	6059	1839	3155	2688	260.78	408.68	223.75	59.99	121.08	108.2	0.000969184	-1.478	down	[C]	Energy production and conversion	Molecular Function: oxidoreductase activity (GO:0016491);; Biological Process: oxidation-reduction process (GO:0055114);;	--	[Q]	Secondary metabolites biosynthesis, transport and catabolism	short chain dehydrogenase;; Enoyl-(Acyl carrier protein) reductase;; KR domain;; NAD(P)H-binding;; NAD dependent epimerase/dehydratase family	Farnesol dehydrogenase OS=Aedes aegypti OX=7159 GN=SDR-1 PE=1 SV=2	S	Function unknown	farnesol dehydrogenase-like isoform X1 [Anoplophora glabripennis]
c59166.graph_c0	453	485	904	207	170	218	16.29	13.93	25.77	8.3	6.65	8.66	0.000242992	-1.48691	down	[E]	Amino acid transport and metabolism	Molecular Function: carboxy-lyase activity (GO:0016831);; Biological Process: carboxylic acid metabolic process (GO:0019752);; Molecular Function: pyridoxal phosphate binding (GO:0030170);;	--	[E]	Amino acid transport and metabolism	Pyridoxal-dependent decarboxylase conserved domain;; Beta-eliminating lyase;; Aminotransferase class-V	Glutamate decarboxylase OS=Drosophila melanogaster OX=7227 GN=Gad1 PE=2 SV=2	E	Amino acid transport and metabolism	cysteine sulfinic acid decarboxylase-like [Anoplophora glabripennis]
c56289.graph_c1	3716	3804	4463	1774	1084	1117	155.84	128.96	161.75	57.53	41.24	44.18	2.87638e-06	-1.49255	down	[I]	Lipid transport and metabolism	Molecular Function: glutaryl-CoA dehydrogenase activity (GO:0004361);; Cellular Component: mitochondrial matrix (GO:0005759);; Cellular Component: microtubule associated complex (GO:0005875);; Biological Process: lysine catabolic process (GO:0006554);; Biological Process: tryptophan metabolic process (GO:0006568);; Biological Process: hydroxylysine catabolic process (GO:0046948);; Molecular Funct…	K00252|8.1144e-119|tca:660326|K00252 glutaryl-CoA dehydrogenase [EC:1.3.8.6] | (RefSeq) glutaryl-CoA dehydrogenase, mitochondrial	[E]	Amino acid transport and metabolism	Acyl-CoA dehydrogenase, C-terminal domain;; Acyl-CoA dehydrogenase, C-terminal domain	Glutaryl-CoA dehydrogenase, mitochondrial OS=Dictyostelium discoideum OX=44689 GN=gcdh PE=3 SV=1	I	Lipid transport and metabolism	glutaryl-CoA dehydrogenase, mitochondrial [Anoplophora glabripennis]
c55518.graph_c0	6346	6508	5120	2721	1408	1875	168.21	130.04	97.46	49.84	27.35	43.78	6.82749e-05	-1.49442	down	[C]	Energy production and conversion	Molecular Function: nucleic acid binding (GO:0003676);; Molecular Function: glycerol-3-phosphate dehydrogenase [NAD+] activity (GO:0004367);; Biological Process: carbohydrate metabolic process (GO:0005975);; Biological Process: nucleobase-containing compound metabolic process (GO:0006139);; Molecular Function: methyltransferase activity (GO:0008168);; Cellular Component: glycerol-3-phosphate dehy…	K00006|0|tca:663884|K00006 glycerol-3-phosphate dehydrogenase (NAD+) [EC:1.1.1.8] | (RefSeq) glycerol-3-phosphate dehydrogenase [NAD(+)], cytoplasmic	[C]	Energy production and conversion	NAD-dependent glycerol-3-phosphate dehydrogenase N-terminus;; NAD-dependent glycerol-3-phosphate dehydrogenase C-terminus;; NAD-dependent glycerol-3-phosphate dehydrogenase N-terminus;; NAD-dependent glycerol-3-phosphate dehydrogenase C-terminus	Glycerol-3-phosphate dehydrogenase [NAD(+)], cytoplasmic OS=Drosophila melanogaster OX=7227 GN=Gpdh PE=1 SV=3	C	Energy production and conversion	glycerol-3-phosphate dehydrogenase [NAD(+)], cytoplasmic isoform X3 [Anoplophora glabripennis]
c46872.graph_c0	445	762	254	145	142	182	12.89	18.8	6.63	3.85	3.77	6.36	0.00403935	-1.49472	down	[QV]	Secondary metabolites biosynthesis, transport and catabolism ;; Defense mechanisms	Molecular Function: monooxygenase activity (GO:0004497);; Molecular Function: iron ion binding (GO:0005506);; Cellular Component: integral component of membrane (GO:0016021);; Molecular Function: oxidoreductase activity, acting on paired donors, with incorporation or reduction of molecular oxygen (GO:0016705);; Molecular Function: heme binding (GO:0020037);; Biological Process: oxidation-reductio…	K10723|0|tca:661451|K10723 ecdysone 20-monooxygenase [EC:1.14.99.22] | (RefSeq) Cyp314a1; cytochrome P450 CYP314A1	[Q]	Secondary metabolites biosynthesis, transport and catabolism	Cytochrome P450	Ecdysone 20-monooxygenase OS=Drosophila melanogaster OX=7227 GN=shd PE=1 SV=3	Q	Secondary metabolites biosynthesis, transport and catabolism	ecdysone 20-monooxygenase [Anoplophora glabripennis]
c55262.graph_c0	51174	60014	62540	20941	21647	13949	1486.72	1452.58	1626.89	467.42	562.42	391.87	1.05011e-06	-1.50105	down	[P]	Inorganic ion transport and metabolism	Molecular Function: catalase activity (GO:0004096);; Biological Process: response to oxidative stress (GO:0006979);; Molecular Function: heme binding (GO:0020037);; Biological Process: hydrogen peroxide catabolic process (GO:0042744);; Molecular Function: metal ion binding (GO:0046872);; Biological Process: oxidation-reduction process (GO:0055114);; Biological Process: cellular oxidant detoxifica…	K03781|0|tca:655157|K03781 catalase [EC:1.11.1.6] | (RefSeq) catalase-like	[P]	Inorganic ion transport and metabolism	Catalase	Catalase OS=Drosophila melanogaster OX=7227 GN=Cat PE=1 SV=2	P	Inorganic ion transport and metabolism	catalase [Anoplophora glabripennis]
c57358.graph_c0	21618	27409	42721	10051	10345	8854	616.74	628.87	1048.27	224.74	271.17	236.3	1.08376e-05	-1.50375	down	[QV]	Secondary metabolites biosynthesis, transport and catabolism ;; Defense mechanisms	Molecular Function: monooxygenase activity (GO:0004497);; Molecular Function: iron ion binding (GO:0005506);; Molecular Function: oxidoreductase activity, acting on paired donors, with incorporation or reduction of molecular oxygen (GO:0016705);; Molecular Function: heme binding (GO:0020037);; Biological Process: oxidation-reduction process (GO:0055114);;	K15003|0|tca:664295|K15003 cytochrome P450 family 9 [EC:1.14.-.-] | (RefSeq) CYP9Z4, GLEAN_06444; cytochrome P450 9Z4	[Q]	Secondary metabolites biosynthesis, transport and catabolism	Cytochrome P450	Cytochrome P450 9e2 OS=Blattella germanica OX=6973 GN=CYP9E2 PE=2 SV=1	Q	Secondary metabolites biosynthesis, transport and catabolism	uncharacterized protein LOC108904004 [Anoplophora glabripennis]
c52082.graph_c1	12152	14013	12361	7953	2712	2234	271.92	261.49	245.32	139.49	56.24	52.35	0.00520821	-1.5047	down	[G]	Carbohydrate transport and metabolism	Molecular Function: transporter activity (GO:0005215);; Biological Process: sodium ion transport (GO:0006814);; Cellular Component: integral component of membrane (GO:0016021);; Biological Process: transmembrane transport (GO:0055085);;	K14445|0|tca:660775|K14445 solute carrier family 13 (sodium-dependent dicarboxylate transporter), member 2/3/5 | (RefSeq) protein I'm not dead yet	[P]	Inorganic ion transport and metabolism	Sodium:sulfate symporter transmembrane region;; Citrate transporter	Protein I'm not dead yet OS=Drosophila melanogaster OX=7227 GN=Indy PE=2 SV=2	P	Inorganic ion transport and metabolism	protein I'm not dead yet isoform X1 [Anoplophora glabripennis]
c37253.graph_c0	2275	5637	3640	1217	1113	1276	132.13	265.26	183.8	54.17	58.18	69.97	6.3503e-05	-1.50972	down	[P]	Inorganic ion transport and metabolism	Molecular Function: ferroxidase activity (GO:0004322);; Cellular Component: cell (GO:0005623);; Biological Process: iron ion transport (GO:0006826);; Biological Process: cellular iron ion homeostasis (GO:0006879);; Molecular Function: ferric iron binding (GO:0008199);; Biological Process: oxidation-reduction process (GO:0055114);;	K00522|2.53235e-84|tca:656261|K00522 ferritin heavy chain [EC:1.16.3.2] | (RefSeq) soma ferritin	[P]	Inorganic ion transport and metabolism	Ferritin-like domain	Soma ferritin OS=Lymnaea stagnalis OX=6523 PE=2 SV=2	P	Inorganic ion transport and metabolism	ferritin, heavy subunit [Anoplophora glabripennis]
c53888.graph_c0	1577	1967	2876	504	856	649	53.76	57.35	82.87	13.83	26.93	21.02	0.000201645	-1.51402	down	[QV]	Secondary metabolites biosynthesis, transport and catabolism ;; Defense mechanisms	Molecular Function: oxidoreductase activity (GO:0016491);; Molecular Function: metal ion binding (GO:0046872);;	K15001|6.36766e-167|tca:641609|K15001 cytochrome P450 family 4 [EC:1.14.-.-] | (RefSeq) CYP4Q4; cytochrome P450 monooxygenase CYP4Q4	[QI]	--	Cytochrome P450	Cytochrome P450 4C1 OS=Blaberus discoidalis OX=6981 GN=CYP4C1 PE=2 SV=1	Q	Secondary metabolites biosynthesis, transport and catabolism	uncharacterized protein LOC108904025 [Anoplophora glabripennis]
c57039.graph_c0	401	752	814	153	244	211	10.4	15.87	18.36	3.05	5.75	5.2	0.000246951	-1.51442	down	[I]	Lipid transport and metabolism	Molecular Function: catalytic activity (GO:0003824);;	K01796|0|tca:663495|K01796 alpha-methylacyl-CoA racemase [EC:5.1.99.4] | (RefSeq) alpha-methylacyl-CoA racemase	[I]	Lipid transport and metabolism	CoA-transferase family III	CaiB/baiF CoA-transferase family protein ZK892.4 OS=Caenorhabditis elegans OX=6239 GN=ZK892.4 PE=3 SV=3	C	Energy production and conversion	alpha-methylacyl-CoA racemase [Anoplophora glabripennis]
c52625.graph_c0	2319	2857	3848	922	949	991	286.91	314.07	531.6	107.33	131.61	134.99	8.92742e-07	-1.51463	down	[QV]	Secondary metabolites biosynthesis, transport and catabolism ;; Defense mechanisms	Molecular Function: oxidoreductase activity (GO:0016491);; Molecular Function: metal ion binding (GO:0046872);;	K15003|1.50111e-163|tca:664295|K15003 cytochrome P450 family 9 [EC:1.14.-.-] | (RefSeq) CYP9Z4, GLEAN_06444; cytochrome P450 9Z4	[Q]	Secondary metabolites biosynthesis, transport and catabolism	Cytochrome P450;; Cytochrome P450	Cytochrome P450 9e2 OS=Blattella germanica OX=6973 GN=CYP9E2 PE=2 SV=1	Q	Secondary metabolites biosynthesis, transport and catabolism	uncharacterized protein LOC108904004 [Anoplophora glabripennis]
c49410.graph_c0	577	536	1036	288	263	140	19.42	14.45	30.18	7.42	7.9	4.47	0.000953941	-1.51541	down	[G]	Carbohydrate transport and metabolism	Molecular Function: transporter activity (GO:0005215);;	K08145|8.24306e-149|tca:658509|K08145 MFS transporter, SP family, solute carrier family 2 (facilitated glucose transporter), member 8 | (RefSeq) facilitated trehalose transporter Tret1-like	[R]	General function prediction only	Sugar (and other) transporter;; Major Facilitator Superfamily	Facilitated trehalose transporter Tret1-2 homolog OS=Drosophila melanogaster OX=7227 GN=Tret1-2 PE=2 SV=1	G	Carbohydrate transport and metabolism	facilitated trehalose transporter Tret1-like [Anoplophora glabripennis]
c44028.graph_c0	4135	4166	5419	1262	1600	1512	227.93	186.27	259.99	53.22	79.42	78.69	3.39118e-06	-1.51645	down	[K]	Transcription	Molecular Function: transferase activity (GO:0016740);; Biological Process: primary metabolic process (GO:0044238);; Biological Process: cellular macromolecule metabolic process (GO:0044260);;	--	[T]	Signal transduction mechanisms	Leucine rich repeat;; Leucine Rich repeats (2 copies);; Leucine-rich repeat;; Leucine Rich Repeat	Toll-like receptor 7 OS=Drosophila melanogaster OX=7227 GN=Toll-7 PE=1 SV=1	S	Function unknown	SLIT and NTRK-like protein 6 [Anoplophora glabripennis]
c56703.graph_c0	7651	9310	10902	3840	3087	2057	180.15	178.08	223.49	69.7	66.08	46.17	4.80343e-06	-1.51769	down	[C]	Energy production and conversion	Molecular Function: methylmalonate-semialdehyde dehydrogenase (acylating) activity (GO:0004491);; Cellular Component: mitochondrion (GO:0005739);; Biological Process: valine metabolic process (GO:0006573);; Molecular Function: malonate-semialdehyde dehydrogenase (acetylating) activity (GO:0018478);; Biological Process: thymine metabolic process (GO:0019859);; Biological Process: oxidation-reducti…	K00140|0|tca:663091|K00140 malonate-semialdehyde dehydrogenase (acetylating) / methylmalonate-semialdehyde dehydrogenase [EC:1.2.1.18 1.2.1.27] | (RefSeq) probable methylmalonate-semialdehyde dehydrogenase [acylating], mitochondrial	[EG]	--	Aldehyde dehydrogenase family	Probable methylmalonate-semialdehyde dehydrogenase [acylating], mitochondrial OS=Aedes aegypti OX=7159 GN=AAEL001134 PE=3 SV=1	I	Lipid transport and metabolism	probable methylmalonate-semialdehyde dehydrogenase [acylating], mitochondrial [Anoplophora glabripennis]
c53224.graph_c0	2160	2216	3529	850	921	745	63.41	52.81	90.16	19.22	24.53	20.81	7.81945e-06	-1.51937	down	--	--	--	--	--	--	Ecdysteroid kinase;; Ecdysteroid kinase;; Protein of unknown function (DUF1679);; Phosphotransferase enzyme family	--	S	Function unknown	uncharacterized protein LOC108907576 [Anoplophora glabripennis]
c58364.graph_c1	27957	44608	31849	14546	9416	9344	397.59	508.13	367.75	137	95.19	136.79	1.41038e-06	-1.52852	down	[Q]	Secondary metabolites biosynthesis, transport and catabolism	--	K00665|0|tca:660178|K00665 fatty acid synthase, animal type [EC:2.3.1.85] | (RefSeq) fatty acid synthase	[I]	Lipid transport and metabolism	Beta-ketoacyl synthase, N-terminal domain;; Beta-ketoacyl synthase, C-terminal domain;; Ketoacyl-synthetase C-terminal extension;; Polyketide synthase dehydratase;; KR domain;; Zinc-binding dehydrogenase;; Zinc-binding dehydrogenase;; Thioesterase domain;; Phosphopantetheine attachment site	Probable polyketide synthase 1 OS=Dictyostelium discoideum OX=44689 GN=stlA PE=1 SV=1	Q	Secondary metabolites biosynthesis, transport and catabolism	fatty acid synthase [Anoplophora glabripennis]
c54237.graph_c1	4139	5444	4889	2300	1121	1241	153.6	162.72	159.13	64.91	38.17	43.4	2.21846e-05	-1.5316	down	[C]	Energy production and conversion	Molecular Function: catalytic activity (GO:0003824);; Biological Process: metabolic process (GO:0008152);;	K00167|0|tca:663575|K00167 2-oxoisovalerate dehydrogenase E1 component beta subunit [EC:1.2.4.4] | (RefSeq) 2-oxoisovalerate dehydrogenase subunit beta, mitochondrial	[C]	Energy production and conversion	Transketolase, pyrimidine binding domain;; Transketolase, C-terminal domain	2-oxoisovalerate dehydrogenase subunit beta, mitochondrial OS=Dictyostelium discoideum OX=44689 GN=bkdB PE=3 SV=1	C	Energy production and conversion	2-oxoisovalerate dehydrogenase subunit beta, mitochondrial [Anoplophora glabripennis]
c52813.graph_c0	2739	3455	2778	1199	670	997	122.59	125.44	108.19	41.22	27.09	42.29	5.15842e-06	-1.53519	down	[G]	Carbohydrate transport and metabolism	--	K01053|1.934e-159|tca:656019|K01053 gluconolactonase [EC:3.1.1.17] | (RefSeq) uncharacterized LOC656019	[PT]	--	SMP-30/Gluconolaconase/LRE-like region;; Two component regulator propeller	--	G	Carbohydrate transport and metabolism	uncharacterized protein LOC108909467 [Anoplophora glabripennis]
c53695.graph_c1	7561	9578	7876	2860	2682	2402	154.71	159.6	140.52	45.08	49.93	46.33	7.00854e-09	-1.53579	down	[G]	Carbohydrate transport and metabolism	Molecular Function: UTP:glucose-1-phosphate uridylyltransferase activity (GO:0003983);; Biological Process: UDP-glucose metabolic process (GO:0006011);;	K00963|0|tca:660308|K00963 UTP--glucose-1-phosphate uridylyltransferase [EC:2.7.7.9] | (RefSeq) UTP--glucose-1-phosphate uridylyltransferase	[G]	Carbohydrate transport and metabolism	UTP--glucose-1-phosphate uridylyltransferase;; Riboflavin kinase	UTP--glucose-1-phosphate uridylyltransferase 2 OS=Dictyostelium discoideum OX=44689 GN=ugpB PE=2 SV=1	G	Carbohydrate transport and metabolism	UTP--glucose-1-phosphate uridylyltransferase isoform X1 [Anoplophora glabripennis]
c56803.graph_c0	89962	95867	97729	43859	26470	21178	2645.73	2284.3	2453.77	946.96	672.77	738.46	1.52335e-05	-1.54001	down	[QV]	Secondary metabolites biosynthesis, transport and catabolism ;; Defense mechanisms	Molecular Function: NADPH-hemoprotein reductase activity (GO:0003958);; Cellular Component: endoplasmic reticulum membrane (GO:0005789);; Molecular Function: FMN binding (GO:0010181);; Cellular Component: integral component of membrane (GO:0016021);; Biological Process: oxidation-reduction process (GO:0055114);;	K00327|0|tca:659809|K00327 NADPH-ferrihemoprotein reductase [EC:1.6.2.4] | (RefSeq) NADPH--cytochrome P450 reductase-like	[C]	Energy production and conversion	FAD binding domain;; Oxidoreductase NAD-binding domain	NADPH--cytochrome P450 reductase OS=Drosophila melanogaster OX=7227 GN=Cpr PE=2 SV=2	P	Inorganic ion transport and metabolism	NADPH--cytochrome P450 reductase isoform X2 [Anoplophora glabripennis]
c57882.graph_c0	536	777	1868	349	268	346	22.03	26.25	58.88	9.33	7.94	12.6	0.00297059	-1.54977	down	[V]	Defense mechanisms	Molecular Function: nucleotide binding (GO:0000166);; Biological Process: transport (GO:0006810);; Cellular Component: membrane (GO:0016020);; Molecular Function: ATPase activity (GO:0016887);;	K05658|0|tca:655590|K05658 ATP-binding cassette, subfamily B (MDR/TAP), member 1 [EC:3.6.3.44] | (RefSeq) multidrug resistance protein 1B	[Q]	Secondary metabolites biosynthesis, transport and catabolism	ABC transporter transmembrane region;; ABC transporter	Multidrug resistance protein homolog 49 OS=Drosophila melanogaster OX=7227 GN=Mdr49 PE=2 SV=2	V	Defense mechanisms	multidrug resistance protein 1-like isoform X2 [Anoplophora glabripennis]
c48016.graph_c0	2049	4914	3242	680	1232	1123	85.99	166.47	118.15	21.94	46.82	44.64	0.000661279	-1.55622	down	--	--	Molecular Function: protein-N-terminal asparagine amidohydrolase activity (GO:0008418);;	K14662|0|tca:655408|K14662 protein N-terminal asparagine amidohydrolase [EC:3.5.1.121] | (RefSeq) protein N-terminal asparagine amidohydrolase	--	--	Protein N-terminal asparagine amidohydrolase	--	S	Function unknown	protein N-terminal asparagine amidohydrolase [Anoplophora glabripennis]
c51143.graph_c0	5761	6467	4399	1754	2192	1276	221.72	201.93	147.29	51.9	76.35	46.62	5.75563e-05	-1.5592	down	[G]	Carbohydrate transport and metabolism	Biological Process: carbohydrate metabolic process (GO:0005975);; Molecular Function: isomerase activity (GO:0016853);;	K01785|8.08244e-149|tca:660201|K01785 aldose 1-epimerase [EC:5.1.3.3] | (RefSeq) aldose 1-epimerase	[G]	Carbohydrate transport and metabolism	Aldose 1-epimerase	--	G	Carbohydrate transport and metabolism	aldose 1-epimerase-like [Anoplophora glabripennis]
c57420.graph_c0	2224	2134	3358	856	749	796	36.01	28.12	47.41	11.86	11.19	12.23	1.55039e-06	-1.56027	down	[QV]	Secondary metabolites biosynthesis, transport and catabolism ;; Defense mechanisms	Molecular Function: binding (GO:0005488);; Molecular Function: oxidoreductase activity (GO:0016491);;	K15003|3.86678e-139|tca:662432|K15003 cytochrome P450 family 9 [EC:1.14.-.-] | (RefSeq) CYP9AD1; cytochrome P450 9AD1	[Q]	Secondary metabolites biosynthesis, transport and catabolism	Cytochrome P450	Cytochrome P450 9e2 OS=Blattella germanica OX=6973 GN=CYP9E2 PE=2 SV=1	Q	Secondary metabolites biosynthesis, transport and catabolism	cytochrome P450 monooxygenase CYP9AD2 [Tenebrio molitor]
c56575.graph_c0	476	775	738	121	293	181	19.85	26.06	27	4.82	12.35	5.81	0.0010377	-1.56277	down	[E]	Amino acid transport and metabolism	--	K00273|3.82632e-100|tca:663711|K00273 D-amino-acid oxidase [EC:1.4.3.3] | (RefSeq) D-aspartate oxidase	[E]	Amino acid transport and metabolism	FAD dependent oxidoreductase	D-amino-acid oxidase OS=Caenorhabditis elegans OX=6239 GN=daao-1 PE=1 SV=2	E	Amino acid transport and metabolism	D-aspartate oxidase [Anoplophora glabripennis]
c51525.graph_c0	338	417	437	113	117	137	15.1	15.36	17.01	3.95	4.74	5.8	1.14067e-06	-1.56285	down	[G]	Carbohydrate transport and metabolism	--	K01053|9.33785e-101|tca:656019|K01053 gluconolactonase [EC:3.1.1.17] | (RefSeq) uncharacterized LOC656019	[PT]	--	SMP-30/Gluconolaconase/LRE-like region;; Two component regulator propeller	--	G	Carbohydrate transport and metabolism	uncharacterized protein LOC108909467 [Anoplophora glabripennis]
c50100.graph_c0	2767	3144	3515	624	1327	912	125.32	116.31	138.22	21.76	53.88	40.18	0.000248024	-1.56578	down	--	--	--	--	--	--	--	--	--	--	chemokine C-C motif receptor-like 2 [Anoplophora glabripennis]
c59646.graph_c1	10452	9597	13902	4324	3179	3078	258.51	192.77	299.29	82.43	71.43	72.54	6.64511e-07	-1.57558	down	[QV]	Secondary metabolites biosynthesis, transport and catabolism ;; Defense mechanisms	--	K14999|0|tca:658976|K14999 cytochrome P450 family 6 [EC:1.14.-.-] | (RefSeq) Cyp6bk4; cytochrome P450 CYP6BK4	[Q]	Secondary metabolites biosynthesis, transport and catabolism	Cytochrome P450	Probable cytochrome P450 6a14 OS=Drosophila melanogaster OX=7227 GN=Cyp6a14 PE=3 SV=2	Q	Secondary metabolites biosynthesis, transport and catabolism	uncharacterized protein LOC108915211 [Anoplophora glabripennis]
c58638.graph_c0	3869	5066	5322	919	1723	1629	60.1	64.41	71.15	11.72	24.32	25.97	0.000112395	-1.57579	down	--	--	Biological Process: regulation of transcription, DNA-templated (GO:0006355);;	K02633|0|tca:659015|K02633 period circadian protein | (RefSeq) Per, clk-6; period	[T]	Signal transduction mechanisms	PAS fold;; PAS domain;; PAS fold;; Period protein 2/3C-terminal region	Period circadian protein (Fragment) OS=Drosophila willistoni OX=7260 GN=per PE=3 SV=2	K	Transcription	period circadian protein isoform X3 [Anoplophora glabripennis]
c56480.graph_c0	3585	4303	3806	2057	835	797	72.3	72.33	66.8	32.14	15.09	15.06	0.000391535	-1.57853	down	[I]	Lipid transport and metabolism	Molecular Function: biotin carboxylase activity (GO:0004075);; Molecular Function: ATP binding (GO:0005524);; Molecular Function: metal ion binding (GO:0046872);;	K01965|0|tca:663547|K01965 propionyl-CoA carboxylase alpha chain [EC:6.4.1.3] | (RefSeq) PCCA; propionyl-CoA carboxylase alpha chain, mitochondrial	[IE]	--	Carbamoyl-phosphate synthase L chain, ATP binding domain;; Biotin carboxylase C-terminal domain;; Biotin carboxylase, N-terminal domain;; D-ala D-ala ligase C-terminus;; ATP-grasp domain;; ATP-grasp domain;; RimK-like ATP-grasp domain	Propionyl-CoA carboxylase alpha chain, mitochondrial OS=Caenorhabditis elegans OX=6239 GN=pcca-1 PE=1 SV=1	I	Lipid transport and metabolism	propionyl-CoA carboxylase alpha chain, mitochondrial [Anoplophora glabripennis]
c57658.graph_c4	939	1549	1315	200	459	459	44.79	61.13	57.28	9.97	20.11	21.88	0.00104694	-1.58199	down	[EF]	Amino acid transport and metabolism ;; Nucleotide transport and metabolism	Molecular Function: serine-pyruvate transaminase activity (GO:0004760);; Molecular Function: alanine-glyoxylate transaminase activity (GO:0008453);;	K00830|1.41242e-133|tca:657046|K00830 alanine-glyoxylate transaminase / serine-glyoxylate transaminase / serine-pyruvate transaminase [EC:2.6.1.44 2.6.1.45 2.6.1.51] | (RefSeq) serine--pyruvate aminotransferase, mitochondrial	[R]	General function prediction only	Aminotransferase class-V	Serine--pyruvate aminotransferase OS=Dictyostelium discoideum OX=44689 GN=agxt PE=3 SV=1	E	Amino acid transport and metabolism	serine--pyruvate aminotransferase, mitochondrial [Anoplophora glabripennis]
c57780.graph_c0	1289	1453	1657	729	342	305	16.35	14.48	19.12	6.78	3.75	3.67	0.000127171	-1.58294	down	[X]	Mobilome: prophages, transposons	--	--	[R]	General function prediction only	Reverse transcriptase (RNA-dependent DNA polymerase);; Integrase core domain;; His(2)-Cys(2) zinc finger	Retrovirus-related Pol polyprotein from transposon 297 OS=Drosophila melanogaster OX=7227 GN=pol PE=3 SV=1	L	Replication, recombination and repair	PREDICTED: uncharacterized protein K02A2.6-like [Crassostrea gigas]
c57083.graph_c0	2821	3577	4746	923	1232	1187	69.44	71.5	101.67	17.51	27.55	27.84	4.44929e-06	-1.58345	down	[C]	Energy production and conversion	Molecular Function: oxidoreductase activity (GO:0016491);; Molecular Function: iron-sulfur cluster binding (GO:0051536);; Biological Process: oxidation-reduction process (GO:0055114);;	K00311|0|tca:658421|K00311 electron-transferring-flavoprotein dehydrogenase [EC:1.5.5.1] | (RefSeq) electron transfer flavoprotein-ubiquinone oxidoreductase, mitochondrial	[C]	Energy production and conversion	Electron transfer flavoprotein-ubiquinone oxidoreductase, 4Fe-4S;; FAD binding domain;; FAD dependent oxidoreductase;; FAD dependent oxidoreductase;; NAD(P)-binding Rossmann-like domain	Electron transfer flavoprotein-ubiquinone oxidoreductase, mitochondrial OS=Caenorhabditis elegans OX=6239 GN=let-721 PE=3 SV=2	C	Energy production and conversion	electron transfer flavoprotein-ubiquinone oxidoreductase, mitochondrial [Anoplophora glabripennis]
c53594.graph_c0	648	744	506	265	149	178	21.24	21.3	14.86	7	5.06	7.54	3.20927e-05	-1.58543	down	--	--	Molecular Function: monooxygenase activity (GO:0004497);; Molecular Function: iron ion binding (GO:0005506);; Cellular Component: integral component of membrane (GO:0016021);; Molecular Function: oxidoreductase activity, acting on paired donors, with incorporation or reduction of molecular oxygen (GO:0016705);; Molecular Function: heme binding (GO:0020037);; Biological Process: oxidation-reductio…	K14999|1.67154e-12|tca:664463|K14999 cytochrome P450 family 6 [EC:1.14.-.-] | (RefSeq) CYP6BQ12; cytochrome P450 6BQ12	[Q]	Secondary metabolites biosynthesis, transport and catabolism	Cytochrome P450	Probable cytochrome P450 6a13 OS=Drosophila melanogaster OX=7227 GN=Cyp6a13 PE=2 SV=1	Q	Secondary metabolites biosynthesis, transport and catabolism	cytochrome P450, partial [Leptinotarsa decemlineata]
c52033.graph_c0	1413	1771	1946	878	449	270	18.74	19.1	22.47	8.99	5.43	3.43	0.000727031	-1.58561	down	--	--	Molecular Function: steroid hormone receptor activity (GO:0003707);; Molecular Function: RNA polymerase II transcription factor activity, ligand-activated sequence-specific DNA binding (GO:0004879);; Cellular Component: nucleus (GO:0005634);; Biological Process: regulation of transcription, DNA-templated (GO:0006355);; Molecular Function: zinc ion binding (GO:0008270);; Biological Process: intrac…	K14032|0|tca:655884|K14032 nuclear receptor subfamily 2 group F member 3 | (RefSeq) Svp; seven up	[T]	Signal transduction mechanisms	Ligand-binding domain of nuclear hormone receptor;; Zinc finger, C4 type (two domains)	Steroid receptor seven-up, isoforms B/C OS=Drosophila melanogaster OX=7227 GN=svp PE=1 SV=1	K	Transcription	steroid receptor seven-up, isoforms B/C [Anoplophora glabripennis]
c57690.graph_c1	2002	2007	2638	873	506	673	45.95	37.01	53.93	15.09	10.42	15.05	2.04309e-06	-1.58745	down	--	--	--	--	[R]	General function prediction only	Sulfotransferase domain;; Sulfotransferase family	--	S	Function unknown	estrogen sulfotransferase-like [Anoplophora glabripennis]
c53830.graph_c1	442	702	694	292	126	145	19.65	24.74	25.39	10.39	5.09	5.66	0.000126241	-1.58898	down	--	--	--	--	--	--	--	--	--	--	uncharacterized protein LOC108918002 isoform X1 [Anoplophora glabripennis]
c41058.graph_c0	22464	28548	62814	19330	8796	6530	413.05	426.58	1005.66	274.22	147.22	114.62	0.00479537	-1.58947	down	[G]	Carbohydrate transport and metabolism	Cellular Component: integral component of membrane (GO:0016021);; Molecular Function: transmembrane transporter activity (GO:0022857);; Biological Process: transmembrane transport (GO:0055085);;	K06258|0|tca:660155|K06258 MFS transporter, VNT family, synaptic vesicle glycoprotein 2 | (RefSeq) synaptic vesicle glycoprotein 2B	[R]	General function prediction only	Major Facilitator Superfamily;; Sugar (and other) transporter	Putative transporter svop-1 OS=Caenorhabditis elegans OX=6239 GN=svop-1 PE=3 SV=5	G	Carbohydrate transport and metabolism	synaptic vesicle glycoprotein 2B [Anoplophora glabripennis]
c24608.graph_c0	6164	8550	9223	2277	2236	2675	296.05	332.96	385.27	83.96	96.94	121.65	4.22276e-08	-1.59085	down	--	--	Cellular Component: cytoplasm (GO:0005737);; Biological Process: lipid metabolic process (GO:0006629);; Cellular Component: integral component of membrane (GO:0016021);; Molecular Function: oxidoreductase activity, acting on the CH-CH group of donors (GO:0016627);; Biological Process: oxidation-reduction process (GO:0055114);;	K10258|2.91862e-127|aec:105153980|K10258 very-long-chain enoyl-CoA reductase [EC:1.3.1.93] | (RefSeq) very-long-chain enoyl-CoA reductase	[I]	Lipid transport and metabolism	3-oxo-5-alpha-steroid 4-dehydrogenase	Probable very-long-chain enoyl-CoA reductase art-1 OS=Caenorhabditis elegans OX=6239 GN=art-1 PE=3 SV=1	S	Function unknown	probable very-long-chain enoyl-CoA reductase art-1 [Anoplophora glabripennis]
c56004.graph_c0	1889	1043	1916	254	740	472	60.64	27.18	53.53	6.28	21.54	14.42	0.00686544	-1.5928	down	[G]	Carbohydrate transport and metabolism	--	K00699|6.25753e-180|tca:656120|K00699 glucuronosyltransferase [EC:2.4.1.17] | (RefSeq) UDP-glucuronosyltransferase 2B16	[GC]	--	UDP-glucoronosyl and UDP-glucosyl transferase;; Glycosyltransferase family 28 C-terminal domain	Putative UDP-glucuronosyltransferase ugt-58 OS=Caenorhabditis elegans OX=6239 GN=ugt-58 PE=3 SV=2	S	Function unknown	UDP-glucuronosyltransferase 2B7-like [Anoplophora glabripennis]
c48221.graph_c0	1902	3733	2653	855	671	940	112.51	179.04	136.8	38.82	35.81	52.58	3.64355e-06	-1.59394	down	[F]	Nucleotide transport and metabolism	--	K13485|2.85192e-28|tca:100142320|K13485 2-oxo-4-hydroxy-4-carboxy-5-ureidoimidazoline decarboxylase [EC:4.1.1.97] | (RefSeq) 2-oxo-4-hydroxy-4-carboxy-5-ureidoimidazoline decarboxylase	--	--	--	--	S	Function unknown	2-oxo-4-hydroxy-4-carboxy-5-ureidoimidazoline decarboxylase [Anoplophora glabripennis]
c49167.graph_c1	1319	3479	3455	1324	492	644	78.74	177.63	193.35	57.8	26.09	37.33	0.00184647	-1.5972	down	[F]	Nucleotide transport and metabolism	Molecular Function: adenylate kinase activity (GO:0004017);; Molecular Function: ATP binding (GO:0005524);; Cellular Component: cytoplasm (GO:0005737);; Biological Process: ATP metabolic process (GO:0046034);; Biological Process: nucleotide phosphorylation (GO:0046939);;	K00939|1.0327e-101|tca:662933|K00939 adenylate kinase [EC:2.7.4.3] | (RefSeq) adenylate kinase isoenzyme 1	[F]	Nucleotide transport and metabolism	Adenylate kinase;; AAA domain;; AAA domain	Adenylate kinase isoenzyme 1 OS=Caenorhabditis elegans OX=6239 GN=F38B2.4 PE=2 SV=1	F	Nucleotide transport and metabolism	adenylate kinase isoenzyme 1 isoform X2 [Anoplophora glabripennis]
c53120.graph_c0	20939	22607	18801	12333	3041	4265	2804.88	2440.69	2188.46	1246.93	360.17	526.16	0.00471504	-1.59815	down	[G]	Carbohydrate transport and metabolism	Molecular Function: hydrolase activity, hydrolyzing O-glycosyl compounds (GO:0004553);; Biological Process: carbohydrate metabolic process (GO:0005975);;	--	[G]	Carbohydrate transport and metabolism	Glycosyl hydrolase family 1	Myrosinase 1 OS=Brevicoryne brassicae OX=69196 PE=1 SV=1	G	Carbohydrate transport and metabolism	myrosinase 1-like [Anoplophora glabripennis]
c54767.graph_c0	243	459	667	166	114	124	4.21	7.14	10.37	2.24	1.8	2.05	0.000196302	-1.60092	down	[T]	Signal transduction mechanisms	Molecular Function: 3',5'-cyclic-nucleotide phosphodiesterase activity (GO:0004114);; Biological Process: signal transduction (GO:0007165);; Molecular Function: metal ion binding (GO:0046872);;	K13763|0|tca:656211|K13763 cGMP-specific 3',5'-cyclic phosphodiesterase, invertebrate [EC:3.1.4.35] | (RefSeq) cGMP-specific 3',5'-cyclic phosphodiesterase	[T]	Signal transduction mechanisms	3'5'-cyclic nucleotide phosphodiesterase;; GAF domain;; GAF domain;; GAF domain	cGMP-specific 3',5'-cyclic phosphodiesterase OS=Drosophila willistoni OX=7260 GN=Pde6 PE=3 SV=1	T	Signal transduction mechanisms	cGMP-specific 3',5'-cyclic phosphodiesterase [Anoplophora glabripennis]
c52919.graph_c0	1549	905	1226	350	340	447	95.06	44.32	66.73	17.6	18.02	26.61	0.00024844	-1.60188	down	[G]	Carbohydrate transport and metabolism	Cellular Component: membrane (GO:0016020);; Molecular Function: transferase activity, transferring hexosyl groups (GO:0016758);;	K00699|5.8699e-104|tca:656290|K00699 glucuronosyltransferase [EC:2.4.1.17] | (RefSeq) 2-hydroxyacylsphingosine 1-beta-galactosyltransferase-like	[GC]	--	UDP-glucoronosyl and UDP-glucosyl transferase;; Glycosyltransferase family 28 C-terminal domain	Putative UDP-glucuronosyltransferase ugt-50 OS=Caenorhabditis elegans OX=6239 GN=ugt-50 PE=1 SV=2	S	Function unknown	UDP-glucuronosyltransferase 2B15 [Anoplophora glabripennis]
c54893.graph_c0	1091	1429	1795	381	522	379	21.66	22.99	30.97	5.85	9.39	7.2	2.92546e-06	-1.60199	down	--	--	Molecular Function: nucleic acid binding (GO:0003676);; Molecular Function: transcription factor activity, sequence-specific DNA binding (GO:0003700);; Biological Process: transcription, DNA-templated (GO:0006351);; Biological Process: developmental process (GO:0032502);; Biological Process: regulation of biological process (GO:0050789);;	K09213|4.29959e-158|tca:656763|K09213 hunchback | (RefSeq) Hb; hunchback	[R]	General function prediction only	Zinc finger, C2H2 type;; Zinc-finger double domain;; C2H2-type zinc-finger domain	Protein hunchback OS=Tribolium castaneum OX=7070 GN=hb PE=3 SV=2	S	Function unknown	protein hunchback-like [Anoplophora glabripennis]
c48666.graph_c0	1651	2363	2152	707	585	567	125.21	145.04	141.79	40.97	39.73	40.41	5.23308e-10	-1.60218	down	[E]	Amino acid transport and metabolism	Molecular Function: extracellular matrix structural constituent (GO:0005201);; Cellular Component: basement membrane (GO:0005604);; Cellular Component: mitochondrion (GO:0005739);; Cellular Component: glycine cleavage complex (GO:0005960);; Biological Process: glycine decarboxylation via glycine cleavage system (GO:0019464);; Biological Process: extracellular matrix organization (GO:0030198);; Bi…	K02437|3.50669e-68|tca:657447|K02437 glycine cleavage system H protein | (RefSeq) glycine cleavage system H protein, mitochondrial	[E]	Amino acid transport and metabolism	Glycine cleavage H-protein	Glycine cleavage system H protein, mitochondrial OS=Drosophila melanogaster OX=7227 GN=ppl PE=2 SV=1	E	Amino acid transport and metabolism	glycine cleavage system H protein, mitochondrial [Anoplophora glabripennis]
c54913.graph_c1	14526	15634	23274	2647	7749	5169	287.48	251.3	400.9	41.33	139.44	97.58	0.00228373	-1.60518	down	--	--	--	--	--	--	--	--	S	Function unknown	golgin subfamily B member 1 [Anoplophora glabripennis]
c55722.graph_c1	786	693	1072	385	147	251	8.34	5.97	9.91	3.14	1.42	2.55	0.000378322	-1.6057	down	--	--	Molecular Function: transporter activity (GO:0005215);; Cellular Component: plasma membrane (GO:0005886);; Biological Process: ion transport (GO:0006811);; Cellular Component: integral component of membrane (GO:0016021);;	--	[Q]	Secondary metabolites biosynthesis, transport and catabolism	Organic Anion Transporter Polypeptide (OATP) family;; Major Facilitator Superfamily;; Kazal-type serine protease inhibitor domain;; Organic Anion Transporter Polypeptide (OATP) family;; Organic Anion Transporter Polypeptide (OATP) family	--	P	Inorganic ion transport and metabolism	solute carrier organic anion transporter family member 5A1 [Anoplophora glabripennis]
c50616.graph_c0	963	428	1089	430	131	218	44.79	16.14	44.06	15.36	5.5	9.6	0.00896968	-1.60698	down	--	--	Cellular Component: membrane (GO:0016020);; Molecular Function: oxidoreductase activity (GO:0016491);; Molecular Function: metal ion binding (GO:0046872);;	K14999|1.23482e-121|tca:658130|K14999 cytochrome P450 family 6 [EC:1.14.-.-] | (RefSeq) CYP6BK13; cytochrome P450 6BK13	[Q]	Secondary metabolites biosynthesis, transport and catabolism	Cytochrome P450	Cytochrome P450 6A1 OS=Musca domestica OX=7370 GN=CYP6A1 PE=2 SV=1	Q	Secondary metabolites biosynthesis, transport and catabolism	cytochrome P450 6a2 isoform X1 [Anoplophora glabripennis]
c57546.graph_c0	5108	6506	7135	1701	1880	1994	137.68	136.22	171.51	34.25	46.85	51.4	2.02919e-08	-1.60903	down	[QV]	Secondary metabolites biosynthesis, transport and catabolism ;; Defense mechanisms	Cellular Component: membrane (GO:0016020);; Molecular Function: oxidoreductase activity (GO:0016491);; Molecular Function: metal ion binding (GO:0046872);;	K14999|0|tca:664465|K14999 cytochrome P450 family 6 [EC:1.14.-.-] | (RefSeq) CYP6BQ11; cytochrome P450 6BQ11	[Q]	Secondary metabolites biosynthesis, transport and catabolism	Cytochrome P450	Cytochrome P450 6a2 OS=Drosophila melanogaster OX=7227 GN=Cyp6a2 PE=2 SV=2	Q	Secondary metabolites biosynthesis, transport and catabolism	probable cytochrome P450 6a20 [Anoplophora glabripennis]
c54784.graph_c1	1125	1042	1079	316	393	275	42.54	32.09	35.46	9.9	13.49	9.9	2.70223e-06	-1.61063	down	[E]	Amino acid transport and metabolism	Molecular Function: argininosuccinate synthase activity (GO:0004055);; Molecular Function: ATP binding (GO:0005524);; Biological Process: arginine biosynthetic process (GO:0006526);; Biological Process: vesicle docking involved in exocytosis (GO:0006904);;	K01940|0|tca:655659|K01940 argininosuccinate synthase [EC:6.3.4.5] | (RefSeq) argininosuccinate synthase	[E]	Amino acid transport and metabolism	Arginosuccinate synthase	Argininosuccinate synthase OS=Aedes aegypti OX=7159 GN=AAEL004701 PE=3 SV=1	E	Amino acid transport and metabolism	argininosuccinate synthase [Anoplophora glabripennis]
c53236.graph_c1	607	927	683	198	216	241	22.11	29.13	21.8	6.34	7.35	8.49	7.4034e-07	-1.6147	down	[O]	Posttranslational modification, protein turnover, chaperones	--	K01374|2.95588e-94|hst:105183495|K01374 cathepsin O [EC:3.4.22.42] | (RefSeq) cathepsin O-like	[O]	Posttranslational modification, protein turnover, chaperones	Papain family cysteine protease;; Peptidase C1-like family	Cysteine proteinase 1 OS=Leishmania pifanoi OX=5682 GN=CYS1 PE=2 SV=2	O	Posttranslational modification, protein turnover, chaperones	cathepsin O [Anoplophora glabripennis]
c59543.graph_c0	19390	18786	19525	5267	6929	5153	178.72	142.19	156.17	37.39	58.04	44.74	7.91539e-07	-1.61567	down	[QV]	Secondary metabolites biosynthesis, transport and catabolism ;; Defense mechanisms	Molecular Function: binding (GO:0005488);; Molecular Function: oxidoreductase activity (GO:0016491);;	K14999|2.32168e-110|tca:664483|K14999 cytochrome P450 family 6 [EC:1.14.-.-] | (RefSeq) CYP6BQ1; cytochrome P450 6A1	[Q]	Secondary metabolites biosynthesis, transport and catabolism	Cytochrome P450	Cytochrome P450 6a8 OS=Drosophila melanogaster OX=7227 GN=Cyp6a8 PE=2 SV=2	Q	Secondary metabolites biosynthesis, transport and catabolism	cytochrome P450 6a8-like [Anoplophora glabripennis]
c57374.graph_c0	1553	2413	3770	432	1046	725	41.42	53.84	91.06	9.3	26.09	21.01	0.00176847	-1.61704	down	[QV]	Secondary metabolites biosynthesis, transport and catabolism ;; Defense mechanisms	Molecular Function: iron ion binding (GO:0005506);; Molecular Function: oxidoreductase activity, acting on paired donors, with incorporation or reduction of molecular oxygen (GO:0016705);; Molecular Function: heme binding (GO:0020037);; Biological Process: oxidation-reduction process (GO:0055114);;	K15001|1.95984e-114|tca:660538|K15001 cytochrome P450 family 4 [EC:1.14.-.-] | (RefSeq) Cyp4bn1; cytochrome P450 CYP4BN1	[QI]	--	Cytochrome P450	Probable cytochrome P450 4d14 OS=Drosophila melanogaster OX=7227 GN=Cyp4d14 PE=3 SV=1	Q	Secondary metabolites biosynthesis, transport and catabolism	cytochrome P450 4d2 [Anoplophora glabripennis]
[truncated: 180 more rows]

## Sheet: aECM-related DEGs for Fig. 3A
#ID	CK1_Count	CK2_Count	CK3_Count	Bx1_Count	Bx2_Count	Bx3_Count	CK1_FPKM	CK2_FPKM	CK3_FPKM	Bx1_FPKM	Bx2_FPKM	Bx3_FPKM	FDR	log2FC	regulated	COG_class	COG_class_annotation	GO_annotation	KEGG_annotation	KOG_class	KOG_class_annotation	Pfam_annotation	Swissprot_annotation	eggNOG_class	eggNOG_class_annotation	SP(Sec/SPI)	OTHER	CS Position	flybase	gene group	location	nr_annotation
[truncated: 251 more rows]

## Sheet: Data for Fig. 3B
FPKM values of 45 selected aECM genes
Gene	Null-1	Null-2	Null-3	Heavy-1	Heavy-2	Heavy-3
Mucin91C	8.23	7.15	8.66	28.77	86.78	65.75
Muc5ACl	6.43	15.45	14.01	29.34	104.31	76.69
[truncated: 43 more rows]
