# Supplementary material for: Hypoxia-induced tracheal elasticity in vector beetle facilitates the loading of pinewood nematode
Source: eLife. 2023 Mar 30;12:e84621. doi: 10.7554/eLife.84621 (PMC10063229; doi:10.7554/eLife.84621)
Supplement: Figure 4—source data 1. [file elife-84621-fig4-data1.xlsx]

## Sheet: Sheet1
Figure 4A.RT-qPCR					Figure 4B.RT-qPCR					Figure 4C. RT-qPCR of Muc91C
	Muc91C	Muc5ACL	Muc3A			Muc91C	Muc5ACL	Muc3A			without PWN	with PWN
Null-1	0.543774	0.989657	0.526224		Normoxia-1	2.15706	0.711203	2.22684		Trachea-1	0.836536	6.44196
Null-2	1.11405	1.09051	1.16372		Normoxia-2	2.78871	0.878633	0.864537		Trachea-2	0.974342	8.61888
Null-3	2.2542	0.572362	0.863788		Normoxia-3	1.12999	0.951538	0.913831		Trachea-3	1.3449	5.96904
Null-4	1.22334	0.976032	2.23264		Normoxia-4	0.48921	1.24258	0.771105		Trachea-4	0.912249	9.17368
Null-5	0.552958	1.79626	0.846012		Normoxia-5	0.300721	1.03407	0.737135
Null-6	1.46214	1.33793	1.13978							Muscle-1	0.0430602	0.122216
Null-7	0.773593	0.712025	1.67452		1%O2-6h-1	1.14224	0.459563	1.10957		Muscle-2	0.0347342	0.132816
Null-8	1.43742	0.96929	0.524404		1%O2-6h-2	1.45687	1.61702	1.21841		Muscle-3	0.0491216	0.173439
					1%O2-6h-3	0.227763	0.866537	0.779165		Muscle-4	0.0522835	0.162386
Light-1	3.93576	0.993092	0.797607		1%O2-6h-4	0.281364	1.1434	1.23542
Light-2	2.17905	1.64718	1.24293		1%O2-6h-5	0.266718	1.1355	1.91853		Gut-1	0.0241388	1.36841
Light-3	1.24841	1.41912	1.04156							Gut-2	0.070928	1.47683
Light-4	3.02563	0.820742	0.869797		1%O2-12h-1	3.51433	0.587774	2.13613		Gut-3	0.079247	2.69914
Light-5	4.72462	0.604997	0.985379		1%O2-12h-2	3.79261	0.746562	2.55797		Gut-4	0.0484453	0.735858
Light-6	2.17673	4.61075	2.3194		1%O2-12h-3	5.38289	1.67985	1.06069
Light-7	2.03866	0.602904	1.41299		1%O2-12h-4	1.1206	0.347078	0.613442
					1%O2-12h-5	5.21665	1.00231	1.34257
Heavy-1	6.2577	1.75321	2.04734
Heavy-2	8.09203	1.27899	2.16407		1%O2-24h-1	1.15219	1.07054	0.760489
Heavy-3	2.52252	1.45902	1.73357		1%O2-24h-2	1.20252	0.80571	0.72951
Heavy-4	4.58289	1.55833	1.53554		1%O2-24h-3	0.380286	0.634342	0.952638
Heavy-5	8.08052	2.07053	1.0026		1%O2-24h-4	0.711282	1.99078	1.44894
Heavy-6	2.65688	3.09513	2.80646		1%O2-24h-5	0.665323	0.535268	0.574349
Heavy-7	3.85243	2.25012	0.90047
