# Supplementary material for: Hypoxia-induced tracheal elasticity in vector beetle facilitates the loading of pinewood nematode
Source: eLife. 2023 Mar 30;12:e84621. doi: 10.7554/eLife.84621 (PMC10063229; doi:10.7554/eLife.84621)
Supplement: Figure 7—figure supplement 1—source data 1. [file elife-84621-fig7-figsupp1-data1.xlsx]

## Sheet: Sheet1
Figure 6-figure supplement 1
A.RT-qPCR				B.Survival rate under 1%O2 for 12h					C.Survival rate in PWN loading assay
iGFP	iMuc91C				total number	survival number				total number	survival number
0.567881	0.224602			iGFP	20	20			iGFP	10	6
4.3822	0.481969			iMuc91C	20	20			iMuc91C	10	7
1.88641	0.1588
0.581759	0.211297
0.366161	0.266003
