# Supplementary material for: Hypoxia-induced tracheal elasticity in vector beetle facilitates the loading of pinewood nematode
Source: eLife. 2023 Mar 30;12:e84621. doi: 10.7554/eLife.84621 (PMC10063229; doi:10.7554/eLife.84621)
Supplement: Figure 7—source data 1. [file elife-84621-fig7-data1.xlsx]

## Sheet: Sheet1
Figure 6A. Thinkness			Figure 6B. Elasticity			Figure 6C. PWN loading number
iGFP+1%O2 12h	iMuc91C+1%O2 12h		iGFP+1%O2 12h	iMuc91C+1%O2 12h		iGFP+1%O2 12h	iMuc91C+1%O2 12h
545.246	360.826		1.89618	3.4135		35097.9	10678.9
567.171	361.837		1.62313	3.72275		17383.3	12007.7
456.348	439.883		2.4891	7.25065		21436.3	12245.5
1089	465.401		3.86638	2.95506		25716.4	7960.91
1850.75	310.719		3.65441	3.64391		17110.6	6956.9
1581.26	571.588		2.42687	2.3428		16000	15173
1147.42	193.863		2.17513	10.5331			7877
768.11	235.99		3.07915	4.10706
690.78	460.112		3.32109	4.11807
1161.59	669.713		4.18792	5.49577
	465.557
	589.08
	239.895
	222.306
	194.798
